# Supplementary material for: Physicochemical properties and Mycobacterium tuberculosis transporters: keys to efficacious antitubercular drugs?
Source: Royal Society of Chemistry journal article supplement (doi:10.1039/d0md00265h), 2020-12-07
Supplement: d0md00265h1.xlsx [file d0md00265h1.xlsx]

## Sheet: TB177 Dcmr
			Chrom logDv3	CMR	EXP Abs	Set	PFI	#Ar			MW
GSK1829676A			5.53	10.613	TB177	TB177	9.53	4			411.38
GSK353069A			4.23	6.057	TB177	TB177	6.23	2			205.28
GSK1829820A			4.07	8.175	TB177	TB177	7.07	3			285.36
GR135486X			4.15	6.217	TB177	TB177	6.15	2			219.67
GSK163574A			5.19	9.449	TB177	TB177	9.19	4			334.4
GSK749336A			5.73	10.17	TB177	TB177	8.73	3			350.41
GW861072X			5.52	10.034	TB177	TB177	7.52	2			356.44
GSK1329419A			3.28	8.944	TB177	TB177	7.28	4			320.32
GSK358607A			4.57	9.859	TB177	TB177	7.57	3			352.38
GSK2111534A			4.67	8.393	TB177	TB177	7.67	3			299.76
SB‐829405			3.93	10.989	TB177	TB177	5.93	2			385.88
GSK153890A			4.8	8.985	TB177	TB177	8.8	4			320.37
GSK888636A			5.7	10.108	TB177	TB177	9.7	4			345.4
GSK1829736A			5.14	9.395	TB177	TB177	8.14	3			402.2
GSK1829729A			3.85	8.221	TB177	TB177	6.85	3			339.34
GSK2200160A			5.15	9.623	TB177	TB177	7.15	2			333.51
GW623128X			6.24	9.271	TB177	TB177	8.24	2			328.84
GSK2200150A			4.38	9.943	TB177	TB177	6.38	2			357.47
GSK1759150A			4.56	10.165	TB177	TB177	7.56	3			356.46
GSK1829732A			3.9	9.005	TB177	TB177	6.9	3			377.32
GSK463114A			4.98	9.706	TB177	TB177	7.98	3			336.38
GSK1783710A			3.35	10.714	TB177	TB177	6.35	3			383.47
SB‐204804‐A			4.45	10.402	TB177	TB177	7.45	3			352.47
GSK1180781A			5.73	11.267	TB177	TB177	8.73	3			410.46
GSK1220329A			4.27	7.155	TB177	TB177	6.27	2			267.35
GSK1829819A			3.55	7.58	TB177	TB177	6.55	3			269.3
GSK1121877A			5.21	13.702	TB177	TB177	9.21	4			467.56
GW339742X			2.38	13.709	TB177	TB177	5.38	3			545.56
GSK1955236A			6.25	9.983	TB177	TB177	10.25	4			349.82
GSK810016A			5.33	10.661	TB177	TB177	9.33	4			379.48
GW356807A			0.03	13.733	TB177	TB177	3.03	3			482.54
GSK731389A			5.06	9.02	TB177	TB177	7.06	2			335.44
GW876411A			3.63	8.985	TB177	TB177	7.63	4			320.37
GSK921190A			4.92	9.236	TB177	TB177	7.92	3			327.42
GW859039X			7.01	10.375	TB177	TB177	9.01	2			374.5
GSK1519001A			3.11	12.05	TB177	TB177	7.11	4			412.49
GSK2059310A			4.57	12.588	TB177	TB177	8.57	4			450.56
SB‐435634			3.47	6.53	TB177	TB177	5.47	2			228.25
GSK1744926A			6.08	10.028	TB177	TB177	8.08	2			397.35
GSK1750922A			3.92	9.246	TB177	TB177	5.92	2			364.36
GSK957094A			4.08	7.902	TB177	TB177	7.08	3			265.31
GSK1829733A			4.79	9.957	TB177	TB177	7.79	3			391.39
GSK695914A			6.61	11.965	TB177	TB177	10.61	4			397.47
GR135487X			4.3	6.236	TB177	TB177	6.3	2			253.22
GSK735816A			5.86	8.768	TB177	TB177	9.86	4			328.39
BRL‐7940SA			5.17	9.872	TB177	TB177	6.17	1			347.46
GSK124576A			5.62	9.866	TB177	TB177	8.62	3			385.25
BRL‐8088SA			3.3	9.24	TB177	TB177	5.3	2			311.38
BRL‐10988SA			4.54	10.371	TB177	TB177	5.54	1			375.47
CCI7967			4.48	10.933	TB177	TB177	7.48	3			380.87
GSK254610A			5.86	11.909	TB177	TB177	8.86	3			441.51
GSK810037A			4.2	8.71	TB177	TB177	8.2	4			328.42
GSK426032A			4.74	10.97	TB177	TB177	7.74	3			425.39
GR223839X			5.74	9.274	TB177	TB177	9.74	4			324.42
GSK735826A			5.6	9.345	TB177	TB177	9.6	4			354.41
GSK861337A			5.13	10.073	TB177	TB177	8.13	3			364.39
GSK829969A			4.85	8.554	TB177	TB177	7.85	3			319.4
GSK124945A			5.88	8.503	TB177	TB177	8.88	3			307.32
GSK1859936A			5.23	11.42	TB177	TB177	8.23	3			410.49
GSK1742694A			6.04	9.131	TB177	TB177	9.04	3			332.44
GSK498315A			4.02	8.495	TB177	TB177	7.02	3			309.32
GSK1996236A			5.99	9.952	TB177	TB177	8.99	3			368.38
GW360240X			2.83	9.369	TB177	TB177	5.83	3			324.38
SB‐650816			4.63	9.997	TB177	TB177	7.63	3			348.4
GSK1829674A			5.12	8.931	TB177	TB177	8.12	3			388.17
GSK762874A			4.27	8.983	TB177	TB177	7.27	3			309.36
BRL‐10143SA			4.45	8.944	TB177	TB177	.	1			319.4
GSK353071A			4.84	6.959	TB177	TB177	6.84	2			231.32
GW857165X			5.52	9.403	TB177	TB177	8.52	3			371.23
GSK1829671A			3.82	8.541	TB177	TB177	6.82	3			363.29
GSK847913A			6.23	8.858	TB177	TB177	9.23	3			347.36
GSK994258A			6.33	9.985	TB177	TB177	9.33	3			336.43
GSK353496A			4.28	5.866	TB177	TB177	6.28	2			211.31
GSK1829728A			3.74	8.09	TB177	TB177	6.74	3			337.3
GSK547481A			1.16	15.218	TB177	TB177	5.16	4			549.71
GSK1365028A			5.2	9.622	TB177	TB177	8.2	3			339.41
GSK920684A			4.94	8.598	TB177	TB177	7.94	3			329.35
BRL‐51091AM			4.76	8.999	TB177	TB177	5.76	1			360.24
GSK2200157A			4.52	9.028	TB177	TB177	6.52	2			317.45
GSK2043267A			5.57	11.595	TB177	TB177	9.57	4			433.43
SB‐516933			5.61	10.377	TB177	TB177	7.61	2			350.41
GSK385518A			4.76	7.175	TB177	TB177	6.76	2			240.3
GSK798463A			4.56	9.318	TB177	TB177	7.56	3			335.36
GSK1072678A			5.37	9.236	TB177	TB177	8.37	3			327.42
BRL‐8903SA			4.03	8.48	TB177	TB177	5.03	1			305.38
GSK1829727A			3.43	7.626	TB177	TB177	6.43	3			323.27
GSK237561A			4.54	9.121	TB177	TB177	8.54	4			336.37
GSK262906A			5.31	9.741	TB177	TB177	6.31	1			345.43
GR153167X			6.28	9.652	TB177	TB177	9.28	3			357.43
GSK2032710A			6.06	12.511	TB177	TB177	9.06	3			435.58
GSK1985270A			5.73	9.793	TB177	TB177	7.73	2			383.84
GSK1589671A			5.64	11.091	TB177	TB177	8.64	3			434.48
GSK381407A			5.13	10.492	TB177	TB177	9.13	4			358.82
SB‐712970			3.96	10.067	TB177	TB177	5.96	2			368.43
GW713556X			5.09	9.439	TB177	TB177	7.09	2			340.37
GSK1826247A			4.38	12.71	TB177	TB177	8.38	4			465.54
SB‐811137‐V			3.96	13.03	TB177	TB177	5.96	2			443.64
GSK754716A			4.67	7.265	TB177	TB177	7.67	3			318.13
GSK705278A			3.94	8.854	TB177	TB177	7.94	4			318.33
GSK1941290A			6.08	13.602	TB177	TB177	10.08	4			475.61
GSK1826825A			6.41	10.108	TB177	TB177	9.41	3			427.64
GSK1589673A			5.81	11.899	TB177	TB177	8.81	3			458.48
GSK847920A			5.56	9.227	TB177	TB177	9.56	4			302.37
GSK275628A			5.64	11.344	TB177	TB177	9.64	4			435.32
GSK636544A			5.47	9.775	TB177	TB177	7.47	2			345.87
GSK1434490A			5.41	9.99	TB177	TB177	8.41	3			382.39
GSK1731114A			5.37	10.194	TB177	TB177	7.37	2			370.46
GSK345724A			4.28	6.125	TB177	TB177	6.28	2			256.22
BRL‐51093AM			4.52	8.944	TB177	TB177	5.52	1			319.4
GSK937733A			5.35	11.411	TB177	TB177	8.35	3			458.43
GSK1402290A			5.86	9.491	TB177	TB177	9.86	4			315.37
GSK1588120A			0.68	10.019	TB177	TB177	.	3			317.43
GSK130506A			5.82	8.373	TB177	TB177	8.82	3			367.71
GSK1925843A			5.22	10.665	TB177	TB177	8.22	3			392.93
GSK991960A			4.47	9.84	TB177	TB177	7.47	3			412.87
GSK445886A			5.14	7.747	TB177	TB177	8.14	3			288.76
GSK1302651A			5.06	8.253	TB177	TB177	8.06	3			283.76
GSK937213A			6.13	10.118	TB177	TB177	9.13	3			365.43
GSK270670A			4.96	9.868	TB177	TB177	7.96	3			373.43
GI247341A			1.95	12.782	TB177	TB177	4.95	3			504.52
GSK1829660A			5.63	9.293	TB177	TB177	8.63	3			307.39
GSK547543A			0.44	15.198	TB177	TB177	4.44	4			544.67
GI103688B			‐2.67	11.399	TB177	TB177	‐0.67	2			430.46
GSK1729177A			4.27	12.384	TB177	TB177	7.27	3			435.54
GSK1758774A			5.52	10.012	TB177	TB177	7.52	2			412.32
GSK1650514A			5.45	8.941	TB177	TB177	8.45	3			351.83
GSK1812410A			5.46	8.959	TB177	TB177	8.46	3			301.34
GSK831784A			5.11	11.499	TB177	TB177	8.11	3			406.48
GSK1857145A			4.98	10.839	TB177	TB177	8.98	4			377.46
GSK848336A			5.84	8.795	TB177	TB177	7.84	2			294.39
GSK1051703A			3.75	9.507	TB177	TB177	6.75	3			335.36
GSK437009A			5.17	9.27	TB177	TB177	8.17	3			320.39
GSK276001A			4.7	9.972	TB177	TB177	7.7	3			349.4
GSK1826089A			4.97	13.691	TB177	TB177	8.97	4			494.63
GSK479031A			5.16	8.737	TB177	TB177	8.16	3			302.82
GSK1055950A			4.27	12.384	TB177	TB177	7.27	3			435.54
GSK1829816A			3.86	7.246	TB177	TB177	5.86	2			245.32
GSK1905227A			2.51	9.08	TB177	TB177	5.51	3			291.39
SB‐811796‐V			4.03	12.429	TB177	TB177	6.03	2			427.6
GSK1863309A			6.08	10.243	TB177	TB177	9.08	3			352.45
GSK316438A			5.27	7.972	TB177	TB177	8.27	3			346.21
SB‐706404			4.51	8.641	TB177	TB177	6.51	2			351.26
GSK547511A			2.51	15.409	TB177	TB177	6.51	4			543.69
GSK1691553A			4.88	9.696	TB177	TB177	8.88	4			347.39
GSK146660A			5.69	9.952	TB177	TB177	8.69	3			368.38
GSK468214A			2.02	9.865	TB177	TB177	5.02	3			389.46
GSK1733953A			6	10.32	TB177	TB177	9	3			385.82
GSK690382A			5.77	9.37	TB177	TB177	9.77	4			340.42
SB‐552112			6.65	12.913	TB177	TB177	9.65	3			412.52
GSK2157753A			4.57	8.943	TB177	TB177	6.57	2			320.43
GSK1832831A			4.63	10.884	TB177	TB177	7.63	3			359.47
GSK347301A			3.59	8.45	TB177	TB177	6.59	3			325.28
GSK1385423A			4.27	12.184	TB177	TB177	8.27	4			430.46
GSK1372568A			4.53	8.239	TB177	TB177	7.53	3			301.39
GSK1788487A			4.67	10.18	TB177	TB177	8.67	4			386.86
GSK920703A			6.33	10.191	TB177	TB177	9.33	3			375.9
GSK1107112A			4.72	7.772	TB177	TB177	6.72	2			314.79
GSK1598164A			2.45	12.282	TB177	TB177	6.45	4			416.54
GSK921295A			5.4	9.236	TB177	TB177	8.4	3			327.42
GW664700A			1.89	10.471	TB177	TB177	3.89	2			371.5
GW369335X			3.8	9.697	TB177	TB177	7.8	4			318.4
GSK889423A			5.8	9.687	TB177	TB177	8.8	3			344.84
GSK1668869A			4.94	8.555	TB177	TB177	7.94	3			344.77
GSK547487A			0.55	14.077	TB177	TB177	4.55	4			501.61
GSK892651A			4.02	7.711	TB177	TB177	7.02	3			271.34
GSK275984A			4.64	9.957	TB177	TB177	7.64	3			331.41
GSK352635A			3.64	4.174	TB177	TB177	5.64	2			222.56
SB‐746177			5.55	9.189	TB177	TB177	8.55	3			305.37
GSK1518999A			3.46	12.514	TB177	TB177	7.46	4			426.51
GSK1570606A			4.99	8.445	TB177	TB177	7.99	3			313.35
GV187303X			5.22	9.065	TB177	TB177	8.22	3			290.36
SB‐354364			4.96	10.108	TB177	TB177	6.96	2			349.42
GSK1635139A			3.92	11.156	TB177	TB177	6.92	3			380.5
GSK1310678A			4.66	7.311	TB177	TB177	7.66	3			300.24
GSK1611550A			5.16	9.047	TB177	TB177	8.16	3			325.38
GSK1174628A			2.05	6.209	TB177	TB177	4.05	2			259.3
GSK133167A			1.97	11.069	TB177	TB177	4.97	3			377.48

## Sheet: Drugs & pipeline
	Status	TB Drug	class	MW	clog P	HBD	HBA	Lip vio	cmr	Chrom logD	PFI	SMILES
1	TB Pipeline	GSK-656	Boronate	257	0.2	3	5	0	6.3	0	1	OCCOc1ccc(c2c1B(O)O[C@@H]2CN)Cl
1	TB Pipeline	Delpazolid	Oxazolidinone	308	1.4	1	7	0	7.9	1.8	2.8	OC[C@H]1CN(C(=O)O1)c1ccc(c(c1)F)N1CCN(N=C1)C
4	TB Pipeline	SQ109	Adaman	331	6.8	2	2	1	10.5	6.3	6.3	C/C(=C\CNCCNC1C2CC3CC1CC(C2)C3)/CCC=C(C)C
1	TB Pipeline	Sutezolid	Oxazolidinone	353	1	1	6	0	9.1	3.7	4.7	CC(=O)NC[C@@H]1OC(=O)N(C1)c1ccc(c(c1)F)N1CCSCC1
2	TB Pipeline	TBA-7371	DprE1	355	1.2	2	7	0	9.6	2.4	5.4	OCCNC(=O)c1cn(c2c1ncc(c2)C)Cc1ncnc(c1C)OC
1	TB Pipeline	TBI-223	Oxazolidinone	365	0.7	1	8	0	8.9	3.1	4.1	COC(=O)NC[C@@H]1OC(=O)N(C1)c1ccc(c(c1)F)N1CC2(C1)COC2
1	TB Pipeline	Contezolid	Oxazolidinone	408	2.3	1	8	0	9.4	3.1	5.1	O=C1CCN(C=C1)c1c(F)cc(c(c1F)F)N1C[C@@H](OC1=O)CNc1ccon1
2	TB Pipeline	BTZ043	DprE1	431	2.5	0	8	0	9.7	6.8	8.8	C[C@H]1COC2(O1)CCN(CC2)c1nc(=O)c2c(s1)c(cc(c2)C(F)(F)F)[N+](=O)[O-]
2	TB Pipeline	Macozinone	DprE1	456	5.1	0	7	1	11.2	8.9	10.9	[O-][N+](=O)c1cc(cc2c1sc(nc2=O)N1CCN(CC1)CC1CCCCC1)C(F)(F)F
1	TB Pipeline	OPC-167832	DprE1	457	3.3	3	6	0	10.8	3.9	5.9	O=C1CCc2c(N1)c(F)ccc2OC[C@]1(O)CCN(C[C@H]1O)c1c(F)cc(cc1F)Cl
3	TB Pipeline	SPR720	Benzimidazoylurea	508	-0.4	5	11	3	12.3	0.7	3.7	CCNC(=O)Nc1nc2c([nH]1)cc(c(c2C1CCCO1)F)c1cnc(nc1)C(OP(=O)(O)O)(C)C
5	TB Pipeline	Telacebec	Imidazopyrdine	557	7.6	1	6	2	14.5	8.6	12.6	CCc1nc2n(c1C(=O)NCc1ccc(cc1)N1CCC(CC1)c1ccc(cc1)OC(F)(F)F)cc(cc2)Cl
6	TB Pipeline	Riminophenazine	Clofazimine	590	6.7	1	8	2	15.8	8.3	12.3	CO[C@@H]1CC[C@H](CC1)/N=c/1\cc2c(cc1Nc1cccnc1OC)nc1c(n2c2ccc(cc2)OC(F)(F)F)cccc1
1	TB Drug	Cycloserine	SHM	102	-1.2	2	4	0	2.3	-0.1	-0.1	N[C@@H]1CONC1=O
1	TB Drug	Pyrazinamide	SHM	123	-0.7	1	4	0	3.1	-0.6	0.4	NC(=O)C1=NC=CN=C1
1	TB Drug	Isoniazid	SHM	137	-0.7	2	4	0	3.7	-0.6	0.4	NNC(=O)C1=CC=NC=C1
1	TB Drug	p-amino salicylic acid	SHM	153	1.1	3	4	0	3.9	-1.3	-0.3	NC1=CC(=C(C=C1)C(O)=O)O
1	TB Drug	Ethionamide	SHM	166	1.7	1	2	0	5.1	2.3	3.3	CCc1cc(ccn1)C(N)=S
1	TB Drug	Ethambutol	SHM	204	0.1	4	4	0	5.9	-0.1	-0.1	CC[C@H](CO)NCCN[C@H](CC)CO
2	TB Drug	Ciprofloxacin	Fluoroquinilone	331	-0.7	2	6	0	8.7	0.8	2.8	OC(=O)c1cn(C2CC2)c2cc(N3CCNCC3)c(F)cc2c1=O
2	TB Drug	Oflaxacin	Fluoroquinilone	361	-0.5	1	7	0	9.3	1	3	CC1COc2c(N3CCN(C)CC3)c(F)cc3c2n1cc(C(O)=O)c3=O
3	TB Drug	Linezolid	Oxazolidinone	338	0.2	1	7	0	8.5	2	3	CC(=O)NCC1CN(C(=O)O1)C2=CC(=C(C=C2)N3CCOCC3)F
4	TB Drug	Pretomanid	Nitroimidazole	359	2.8	0	8	0	7.7	6	8	[O-][N+](=O)c1cn2c(n1)OC[C@H](C2)OCc1ccc(cc1)OC(F)(F)F
4	TB Drug	Delamanid	Nitroimidazole	534	5.3	0	10	3	12.9	8	11	C[C@]1(COc2ccc(cc2)N2CCC(CC2)Oc2ccc(OC(F)(F)F)cc2)Cn2cc(nc2O1)[N+]([O-])=O
4	TB Drug	Bedaquiline	Arylquinoline	556	6.9	1	3	2	15	6	11.9	CN(C)CC[C@](O)([C@H](c1ccccc1)c1cnc2ccc(Br)cc2c1)c1cccc2ccccc12
5	TB Drug	Kanamycin	Aminoglycoside	484	-3.9	11	15	2	11.2	0.9	0.9	NC[C@H]1O[C@H](O[C@@H]2[C@@H](N)C[C@@H](N)[C@H](O[C@H]3O[C@H](CO)[C@@H](O)[C@H](N)[C@H]3O)[C@H]2O)[C@H](O)[C@@H](O)[C@@H]1O
5	TB Drug	Streptomycin	Aminoglycoside	571	-3.5	14	19	3	13.3	-5	-5	C[C@H]1[C@@](C=O)(O)[C@@H](O[C@H]2[C@@H](NC)[C@H](O)[C@@H](O)[C@H](CO)O2)[C@H](O[C@@H]3[C@@H](NC(N)=N)[C@H](O)[C@@H](NC(N)=N)[C@H](O)[C@H]3O)O1
6	TB Drug	Rifamycin	Rifamycin	698	4.2	13	6	3	18.2	4.6	6.6	CO[C@H]1\C=C\O[C@@]2(C)Oc3c(C)c(O)c4c(O)c(NC(=O)\C(=C/C=C/[C@H](C)[C@H](O)[C@@H](C)[C@@H](O)[C@@H](C)[C@H](OC(=O)C)[C@@H]1C)\C)cc(O)c4c3C2=O
6	TB Drug	Rifampicin	Rifamycin	823	3.7	6	16	3	22	4.3	6.3	CO[C@H]1\C=C\O[C@@]2(C)Oc3c(C)c(O)c4c(O)c(NC(=O)\C(C)=C/C=C/[C@H](C)[C@H](O)[C@@H](C)[C@@H](O)[C@@H](C)[C@H](OC(C)=O)[C@@H]1C)c(\C=N\N1CCN(C)CC1)c(O)c4c3C2=O

## Sheet: TB review data
SMILES	SUBSTANCE NAME	mw	clogp	liphbd	liphba		cmr	cChrom log D7.4	PFI
CC(=O)OC1=C(C=CC=C1)C(O)=O	ASPIRIN	180.16	1.023	1	4		4.458	-0.24	0.76
COC(=O)[C@@H](N1CCC2=C(C1)C=CS2)C3=CC=CC=C3Cl	CLOPIDOGREL BISULFATE	321.82	4.208	0	3		8.663	6.73	8.73
CN1CC[C@@]23[C@H]4CCC(=O)[C@@H]2OC5=C(O)C=CC(=C35)C[C@@H]14	HYDROMORPHONE HYDROCHLORIDE	285.34	0.72	1	4		7.791	0.98	1.98
NC(N)=N	GUANIDINE HYDROCHLORIDE	59.07	-2.387	3	3		1.57	-1.08	-1.08
CCC(C)C1(CC)C(=O)NC(=O)NC1=O	BUTABARBITAL SODIUM	212.25	1.583	2	5		5.482	2.61	2.61
CCOC(=O)C1(CCN(C)CC1)C2=CC=CC=C2	MEPERIDINE HYDROCHLORIDE	247.34	2.227	0	3		7.243	3.69	4.69
CNC(C)CC1=CC=CC=C1	METHAMPHETAMINE HYDROCHLORIDE	149.24	1.888	1	1		4.912	1.52	2.52
CN1C(=O)OC(C)(C)C1=O	TRIMETHADIONE	143.14	-0.117	0	4		3.376	1.57	1.57
CC[C@@H](CO)NC(=O)[C@H]1CN(C)[C@@H]2CC3=C[NH]C4=CC=CC(=C34)C2=C1	METHYLERGONOVINE MALEATE	339.44	1.758	3	5		9.918	2.9	4.9
CCCC1=C[C](=O)[NH][C](=S)[NH]1	PROPYLTHIOURACIL	170.23	0.971	2	3		4.94	2.99	3.99
CCC(=O)C(CC(C)N(C)C)(C1=CC=CC=C1)C2=CC=CC=C2	METHADONE HYDROCHLORIDE	309.45	4.167	0	2		9.778	5	7
CCN(CC)CCOC(=O)C1(CCCCC1)C2CCCCC2	DICYCLOMINE HYDROCHLORIDE	309.49	6.138	0	3		9.192	6.88	6.88
OC(=O)C1=CC(=CC=C1O)N=NC2=CC=C(C=C2)[S](=O)(=O)NC3=NC=CC=C3	SULFASALAZINE	398.39	3.995	3	9		10.563	1.9	4.9
NC1CONC1=O	CYCLOSERINE	102.09	-1.192	2	4		2.318	-0.05	-0.05
C[C@]12CCC(=O)C=C1CC[C@H]3[C@@H]4CC[C@](O)(C(=O)CO)[C@@]4(C)CC(O)[C@H]23	HYDROCORTISONE	362.47	1.887	3	5		9.789	1.72	1.72
O=C1CN(\N=C\C2=CC=C(O2)[N](=O)=O)C(=O)N1	NITROFURANTOIN	238.16	-0.467	1	9		5.496	0.48	1.48
CCC1=C(C(=NC(=N1)N)N)C2=CC=C(Cl)C=C2	PYRIMETHAMINE	248.71	3.003	2	4		6.934	3.32	5.32
O=C1NC(=O)C(N1)(C2=CC=CC=C2)C3=CC=CC=C3	PHENYTOIN	252.27	2.085	2	4		7.223	3.38	5.38
CC(COC1=CC=CC=C1)N(CCCl)CC2=CC=CC=C2	PHENOXYBENZAMINE HYDROCHLORIDE	303.83	4.917	0	2		8.996	8.03	10.03
C[N+]1(C)C2CC(CC1C3OC23)OC(=O)C(CO)C4=CC=CC=C4	METHSCOPOLAMINE BROMIDE	318.39	-2.474	1	5		8.674	1.59	2.59
CN(CC1=CN=C2N=C(N)N=C(N)C2=N1)C3=CC=C(C=C3)C(=O)NC(CCC(O)=O)C(O)=O	METHOTREXATE SODIUM	454.45	-0.529	5	13		11.642	-0.03	2.97
CN(C)C(=O)OC1=C[N+](=CC=C1)C	PYRIDOSTIGMINE BROMIDE	181.21	-4.264	0	4		4.979	-0.89	0.11
COC(=O)C(C1CCCCN1)C2=CC=CC=C2	METHYLPHENIDATE HYDROCHLORIDE	233.31	2.555	1	3		6.779	2.26	3.26
CCN(CCO)CCCC(C)NC1=C2C=CC(=CC2=NC=C1)Cl	HYDROXYCHLOROQUINE SULFATE	335.88	4.116	2	4		9.722	2.09	4.09
CC(C)CCC[C@@H](C)CCC[C@@H](C)CCC\C(C)=C\CC1=C(C)C(=O)C2=C(C=CC=C2)C1=O	PHYTONADIONE	450.71	12.012	0	2		13.975	8.62	9.62
N[C@@H](CC1=CC(=C(OC2=CC=C(O)C(=C2)I)C(=C1)I)I)C(O)=O	LIOTHYRONINE SODIUM	650.98	2.631	3	5		11.374	1.62	3.62
CN1C(=O)CC(C)(C1=O)C2=CC=CC=C2	METHSUXIMIDE	203.24	1.461	0	3		5.734	3.07	4.07
CCN1C(=O)NC(C1=O)C2=CC=CC=C2	ETHOTOIN	204.23	1.482	1	4		5.639	2.04	3.04
CC1C[C@H]2[C@@H]3CC[C@](O)(C(=O)CO)[C@@]3(C)CC(O)[C@@H]2[C@@]4(C)C=CC(=O)C=C14	METHYLPREDNISOLONE	374.48	1.742	3	5		10.303	2.81	2.81
CCCCNC1=CC=C(C=C1)C(=O)OCCOCCOCCOCCOCCOCCOCCOCCOCCOC	BENZONATATE	603.75	2.22	1	12		15.755	5	6
CCN(CC)C(C)C(=O)C1=CC=CC=C1	DIETHYLPROPION HYDROCHLORIDE	205.3	2.85	0	2		6.34	3.66	4.66
CC1=CC(=NO1)C(=O)NNCC2=CC=CC=C2	ISOCARBOXAZID	231.25	0.994	2	5		6.367	2.2	4.2
CCCC(C)(COC(N)=O)COC(=O)NC(C)C	CARISOPRODOL	260.33	2.341	2	6		6.858	4.17	4.17
CC1C[C@@H]2[C@H](CC[C@@]3(C)[C@H]2CC[C@]3(OC(C)=O)C(C)=O)[C@@]4(C)CCC(=O)C=C14	MEDROXYPROGESTERONE ACETATE	386.53	4.196	0	4		10.91	7.46	7.46
CN1C2CCC1CC(C2)OC(=O)C(CO)C3=CC=CC=C3	ATROPINE SULFATE	289.38	1.299	1	4		8.146	2.04	3.04
CC(=O)S[C@@H]1CC2=CC(=O)CC[C@]2(C)[C@H]3CC[C@@]4(C)[C@@H](CC[C@@]45CCC(=O)O5)[C@H]13	SPIRONOLACTONE	416.58	2.839	0	4		11.539	8.26	8.26
CCOC(=O)C1(CCN(CC1)CCC(C#N)(C2=CC=CC=C2)C3=CC=CC=C3)C4=CC=CC=C4	DIPHENOXYLATE HYDROCHLORIDE	452.6	5.331	0	4		13.671	7.94	10.94
NNCCC1=CC=CC=C1	PHENELZINE SULFATE	136.2	1.033	2	2		4.354	1.43	2.43
C[N+]1(C)CCC(C1)OC(=O)C(O)(C2CCCC2)C3=CC=CC=C3	GLYCOPYRROLATE	318.44	0.121	1	4		9.163	4.73	5.73
CC1=CC(=CC(=C1)OCC2CNC(=O)O2)C	METAXALONE	221.26	2.145	1	4		6.005	4.43	5.43
N[S](=O)(=O)C1=C(Cl)C=C2NC=N[S](=O)(=O)C2=C1	CHLOROTHIAZIDE	295.71	-1	2	7		6.14	-0.29	0.71
CC1=NC=C([N]1CCO)[N](=O)=O	METRONIDAZOLE	171.16	-0.457	1	6		4.063	0.09	1.09
CN1C(=O)CN=C(C2=CC=CC=C2)C3=C1C=CC(=C3)Cl	DIAZEPAM	284.74	2.961	0	3		8.117	5.66	7.66
CNCCCN1C2=CC=CC=C2CCC3=CC=CC=C13	DESIPRAMINE HYDROCHLORIDE	266.39	4.468	1	2		8.543	3.83	5.83
CCC1OC(=O)C(C)C(OC2C[C@@](C)(OC)C(O)C(C)O2)C(C)C(OC3OC(C)CC(C3O)N(C)C)[C@](C)(O)CC(C)C(=O)C(C)C(O)[C@]1(C)O	ERYTHROMYCIN STEARATE	733.94	1.611	5	14		18.93	4.75	4.75
O=[C]1N=CN=C2[NH][NH]C=C12	ALLOPURINOL	136.11	-1.056	2	5		3.386	-1.06	0.94
CNC1=NC2=C(C=C(Cl)C=C2)C(=[N](=O)C1)C3=CC=CC=C3	CHLORDIAZEPOXIDE HYDROCHLORIDE	299.76	2.465	1	4		8.539	2.97	4.97
N[S](=O)(=O)C1=C(Cl)C=C(NCC2=CC=CO2)C(=C1)C(O)=O	FUROSEMIDE	330.74	1.9	3	7		7.631	0.66	2.66
OCC1OC(OC2C(CO)O[C@](O)(CO)C2O)C(O)C(O)C1O	LACTULOSE	342.3	-3.59	8	11		7.072	0.11	0.11
CC1=C(C)C(=CC=C1)NC2=CC=CC=C2C(O)=O	MEFENAMIC ACID	241.29	5.137	2	3		7.149	2.95	4.95
CCC(=C)C(=O)C1=CC=C(OCC(O)=O)C(=C1Cl)Cl	ETHACRYNIC ACID	303.14	3.445	1	4		7.346	3.54	4.54
CCN(CC)CCOC1=CC=C(C=C1)\C(=C(\Cl)C2=CC=CC=C2)C3=CC=CC=C3	CLOMIPHENE CITRATE	405.97	7.151	0	2		12.561	6.45	9.45
CC1[C@H]2C(O)[C@H]3C(N(C)C)C(=C(C(N)=O)C(=O)[C@@]3(O)C(=C2C(=O)C4=C1C=CC=C4O)O)O	DOXYCYCLINE HYCLATE	444.44	-0.499	6	10		11.288	1.96	2.96
NC(=O)N1C2=CC=CC=C2C=CC3=CC=CC=C13	CARBAMAZEPINE	236.27	2.38	1	3		7.161	4.28	6.28
C[N]1C=NC(=C1SC2=NC=NC3=C2[NH]C=N3)[N](=O)=O	AZATHIOPRINE	277.26	0.512	1	9		6.784	2.37	5.37
CC1(C)S[C@@H]2[C@H](NC(=O)COC3=CC=CC=C3)C(=O)N2[C@H]1C(O)=O	PENICILLIN V POTASSIUM	350.39	1.944	2	7		8.929	0.82	1.82
OCCOCCN1CCN(CC1)C(C2=CC=CC=C2)C3=CC=C(Cl)C=C3	HYDROXYZINE PAMOATE	374.91	3.995	1	4		10.732	5.54	7.54
CC(C)(S)[C@@H](N)C(O)=O	PENICILLAMINE	149.21	-1.729	2	3		3.86	-0.9	-0.9
CCC[C@@H]1C[C@H](N(C)C1)C(O)=N[C@H]([C@H](C)Cl)[C@H]2O[C@H](SC)[C@H](O)[C@@H](O)[C@H]2O	CLINDAMYCIN HYDROCHLORIDE	424.98	2.81	4	7		10.794	2.52	2.52
NC(=O)C1=NC=CN=C1	PYRAZINAMIDE	123.11	-0.676	1	4		3.135	-0.62	0.38
NC1=C(F)C=N[C](=O)[NH]1	FLUCYTOSINE	129.09	-1.635	2	4		2.864	-0.53	0.47
CC1=C(N2[C@H](SC1)C(NC(=O)C(N)C3=CC=CC=C3)C2=O)C(O)=O	CEPHALEXIN	347.39	-1.84	3	7		9.195	-0.15	0.85
CC1=C(C(=O)NC2[C@H]3SC(C)(C)C(N3C2=O)C(O)=O)C(=NO1)C4=C(Cl)C=CC=C4Cl	DICLOXACILLIN SODIUM	470.32	2.981	2	8		11.273	1.88	3.88
CO[C@H]1\C=C\O[C@@]2(C)OC3=C(C2=O)C4=C(O)C(=C(NC(=O)\C(=C/C=C/[C@H](C)[C@H](O)[C@@H](C)[C@@H](O)[C@@H](C)[C@H](OC(C)=O)[C@@H]1C)C)C(=C4C(=C3C)O)O)\C=N\N5CCN(C)CC5	RIFAMPIN	822.95	3.71	6	16		22.008	4.29	6.29
NNC(=O)C1=CC=NC=C1	ISONIAZID	137.14	-0.668	2	4		3.714	-0.64	0.36
OC(=O)C1N=C(C2=CC=CC=C2)C3=C(NC1=O)C=CC(=C3)Cl	CLORAZEPATE DIPOTASSIUM	314.73	2.51	2	5		8.306	1.32	3.32
C[C@]1(O)CC[C@H]2[C@@H]3CC[C@H]4CC(=O)\C(C[C@]4(C)[C@H]3CC[C@]12C)=C/O	OXYMETHOLONE	332.48	4.137	2	3		9.6	4.53	4.53
C[C@]12CC(=O)[C@H]3[C@@H](CCC4=CC(=O)C=C[C@]34C)[C@@H]1CC[C@]2(O)C(=O)CO	PREDNISONE	358.43	1.661	2	5		9.722	2.56	2.56
CC(=O)OCC(=O)[C@@]1(O)CC[C@H]2[C@@H]3CCC4=CC(=O)CC[C@]4(C)[C@H]3C(=O)C[C@]12C	CORTISONE ACETATE	402.49	2.022	1	6		10.635	3.54	3.54
CCCC(C)(COC(N)=O)COC(N)=O	MEPROBAMATE	218.25	0.915	2	6		5.467	2.68	2.68
CC(CN1C2=CC=CC=C2SC3=CC=CC=C13)N(C)C	PROMETHAZINE HYDROCHLORIDE	284.42	4.6	0	2		8.885	4.31	6.31
N[S](=O)(=O)C1=C(Cl)C=C2NCN[S](=O)(=O)C2=C1	HYDROCHLOROTHIAZIDE	297.73	-0.365	3	7		6.318	0.84	1.84
C[C@]12CC[C@H]3[C@@H](CCC4=CC(=O)CC[C@H]34)[C@@H]1CC[C@@]2(O)C#C	NORETHINDRONE	298.43	2.79	1	2		8.78	5.44	5.44
C[C@]1(O)CC[C@H]2[C@@H]3CCC4=CC(=O)CC[C@]4(C)[C@H]3CC[C@]12C	METHYLTESTOSTERONE	302.46	3.928	1	2		8.983	5.58	5.58
CN(C)CCCN1C2=CC=CC=C2SC3=C1C=C(Cl)C=C3	CHLORPROMAZINE HYDROCHLORIDE	318.86	5.5	0	2		9.377	4.55	6.55
CC1NC2=CC(=C(C=C2C(=O)N1C3=CC=CC=C3C)[S](N)(=O)=O)Cl	METOLAZONE	365.83	2.056	2	6		9.383	4.13	6.13
CC(C)C(C)C=CC(C)[C@H]1CC[C@H]2C(CCC[C@]12C)=CC=C3CC(O)CCC3=C	ERGOCALCIFEROL	396.66	9.391	1	1		12.987	9.78	9.78
C[C@@](CC1=CC(=C(O)C=C1)O)(NN)C(O)=O	CARBIDOPA	226.23	-0.445	5	6		5.776	-2.25	-1.25
COC(=O)NC1=NC2=C([NH]1)C=C(C=C2)C(=O)C3=CC=CC=C3	MEBENDAZOLE	295.3	3.077	2	6		8.091	3.92	6.92
ClC1=CC=CC=C1C2=NCC(=O)NC3=C2C=C(C=C3)[N](=O)=O	CLONAZEPAM	315.71	2.384	1	6		8.264	4.99	6.99
CCN(CC)CCCC(C)NC1=C2C=CC(=CC2=NC=C1)Cl	CHLOROQUINE PHOSPHATE	319.88	5.06	1	3		9.568	3.89	5.89
CC1C[C@H]2[C@@H]3CCC4=CC(=O)C=C[C@]4(C)[C@@]3(F)C(O)C[C@]2(C)[C@@]1(O)C(=O)CO	DEXAMETHASONE	392.47	1.785	3	5		10.319	3.11	3.11
CC(N)CC1=CC=CC=C1	DEXTROAMPHETAMINE SULFATE	135.21	1.742	1	1		4.449	0.71	1.71
C1N2CN3CN1CN(C2)C3	METHENAMINE HIPPURATE	140.19	2.435	0	4		3.903	-0.75	-0.75
CC(C)CC1(CC=C)C(=O)NC(=O)NC1=O	BUTALBITAL	224.26	1.628	2	5		5.921	2.96	2.96
COC1=CC2=C(C=C1)C=C(C=C2)C(C)C(O)=O	NAPROXEN	230.26	2.816	1	3		6.574	1.69	3.69
COC1=CC=CC=C1OCC(O)COC(N)=O	METHOCARBAMOL	241.24	0.146	2	6		6.024	2.22	3.22
CN(C)CCCN1C2=CC=CC=C2CCC3=CC=CC=C13	IMIPRAMINE HYDROCHLORIDE	280.42	5.037	0	2		9.006	4.13	6.13
CCCN(CCC)[S](=O)(=O)C1=CC=C(C=C1)C(O)=O	PROBENECID	285.36	3.371	1	5		7.365	1.78	2.78
COC1=CC2=C(C=CN=C2C=C1)C(O)[C@H]3C[C@@H]4CCN3CC4C=C	QUINIDINE SULFATE	324.42	2.785	1	4		9.562	2.4	4.4
CC(=O)NC1=CC=C(O)C=C1	ACETAMINOPHEN	151.16	0.494	2	3		4.174	0.44	1.44
CC1C(OCCN1C)C2=CC=CC=C2	PHENDIMETRAZINE TARTRATE	191.27	2.125	0	2		5.816	2.6	3.6
CN(C)CCC=C1C2=CC=CC=C2CCC3=CC=CC=C13	AMITRIPTYLINE HYDROCHLORIDE	277.41	4.851	0	1		9.152	4.73	6.73
CC(C)N(CCC(C(N)=O)(C1=CC=CC=C1)C2=NC=CC=C2)C(C)C	DISOPYRAMIDE PHOSPHATE	339.48	2.576	1	4		10.4	2.64	4.64
CCCC(CCC)C(O)=O	VALPROIC ACID	144.21	2.76	1	2		4.077	-0.42	-0.42
CCC1(C(=O)NCNC1=O)C2=CC=CC=C2	PRIMIDONE	218.26	0.882	2	4		6.103	0.21	1.21
CC(=O)NC1=NN=C(S1)[S](N)(=O)=O	ACETAZOLAMIDE	222.24	-0.981	2	7		4.649	-0.32	0.68
O=[N](=O)OC1CO[C@@H]2C(CO[C@H]12)O[N](=O)=O	ISOSORBIDE DINITRATE	236.14	0.219	0	10		4.441	5.02	5.02
CN(C)CCOC(C)(C1=CC=CC=C1)C2=CC=CC=N2	DOXYLAMINE SUCCINATE	270.38	2.354	0	3		8.293	2.73	4.73
COC1=C2O[C@H]3C(O)C=C[C@H]4[C@H]5CC(=C2[C@@]34CCN5C)C=C1	CODEINE PHOSPHATE	299.37	0.977	1	4		8.347	0.95	1.95
CC1(C)S[C@@H]2C(NC(=O)C(N)C3=CC=C(O)C=C3)C(=O)N2C1C(O)=O	AMOXICILLIN	365.4	-1.872	4	8		9.298	-0.23	0.77
C[C@](N)(CC1=CC=C(O)C=C1)C(O)=O	METYROSINE	195.22	-1.667	3	4		5.254	-2.01	-1.01
NC1=CC=C(C=C1)[S](=O)(=O)C2=CC=C(N)C=C2	DAPSONE	248.3	0.886	2	4		6.81	1.11	3.11
CC(C)(C)NCC(O)COC1=CC=CC2=C1CC(O)C(O)C2	NADOLOL	309.41	0.379	4	5		8.594	0.51	1.51
NNC1=NN=CC2=CC=CC=C12	HYDRALAZINE HYDROCHLORIDE	160.18	1.173	2	4		4.692	0.88	2.88
OCCN(CCO)C1=NC2=C(N=C(N=C2N3CCCCC3)N(CCO)CCO)C(=N1)N4CCCCC4	DIPYRIDAMOLE	504.64	1.492	4	12		13.613	2.51	4.51
CC(C)(N)CC1=CC=CC=C1	PHENTERMINE HYDROCHLORIDE	149.24	2.141	1	1		4.912	1.32	2.32
CC1=NN=C2CN=C(C3=CC=CC=C3)C4=C(C=CC(=C4)Cl)[N]12	ALPRAZOLAM	308.77	2.555	0	4		8.84	5.03	8.03
N[S](=O)(=O)C1=C(Cl)C=CC(=C1)C2(O)NC(=O)C3=CC=CC=C23	CHLORTHALIDONE	338.76	0.448	3	6		8.24	2.69	4.69
COC(=O)C1=C(C)NC(=C(C1C2=CC=CC=C2[N](=O)=O)C(=O)OC)C	NIFEDIPINE	346.34	3.125	1	8		9.072	4.13	5.13
CC(C)[N+](C)(CCOC(=O)C1C2=CC=CC=C2OC3=CC=CC=C13)C(C)C	PROPANTHELINE BROMIDE	368.5	1.493	0	4		10.924	6.18	8.18
CC1=CC(=CC=C1)CN2CCN(CC2)C(C3=CC=CC=C3)C4=CC=C(Cl)C=C4	MECLIZINE HYDROCHLORIDE	390.96	6.732	0	2		12.009	8.4	11.4
CN1CCN(CCCN2C3=CC=CC=C3SC4=C2C=C(C=C4)C(F)(F)F)CC1	TRIFLUOPERAZINE HYDROCHLORIDE	407.5	4.892	0	3		10.978	5.99	7.99
C[N]1[C](=O)[N](C)C2=C([NH]C=N2)[C]1=O	THEOPHYLLINE ANHYDROUS	180.17	-0.034	1	6		4.527	0.14	2.14
CN(C)CCOC(C1=CC=CC=C1)C2=CC=CC=C2	DIPHENHYDRAMINE HYDROCHLORIDE	255.36	3.452	0	2		8.041	5.14	7.14
CC1=NN=C2CN=C(C3=CC=CC=C3Cl)C4=C(C=CC(=C4)Cl)[N]12	TRIAZOLAM	343.21	2.618	0	4		9.331	6.01	9.01
CN1C(CCl)NC2=CC(=C(C=C2[S]1(=O)=O)[S](N)(=O)=O)Cl	METHYCLOTHIAZIDE	360.22	0.937	2	7		7.737	3.38	4.38
CN1CC(C=C2[C@H]1CC3=C[NH]C4=CC=CC2=C34)C(=O)N[C@]5(C)O[C@@]6(O)[C@@H]7CCCN7C(=O)C(CC8=CC=CC=C8)N6C5=O	ERGOTAMINE TARTRATE	581.67	4.661	3	10		16.105	3.99	6.99
CC(=O)NO	ACETOHYDROXAMIC ACID	75.07	-1.594	2	3		1.662	-1.6	-1.6
CCCC(C)C1(CC=C)C(=O)NC(=O)NC1=O	SECOBARBITAL SODIUM	238.29	2.157	2	5		6.385	3.93	3.93
CC1=CC(=NO1)N[S](=O)(=O)C2=CC=C(N)C=C2	SULFAMETHOXAZOLE	253.28	0.563	2	6		6.276	1.39	3.39
CC(C)NCC(O)COC1=CC=CC2=CC=CC=C12	PROPRANOLOL HYDROCHLORIDE	259.35	2.753	2	3		7.834	2.92	4.92
COC1=C2O[C@H]3C(=O)CC[C@H]4[C@H]5CC(=C2[C@@]34CCN5C)C=C1	HYDROCODONE BITARTRATE	299.37	1.126	0	4		8.255	2.04	3.04
C[C@]1(O)CC[C@H]2[C@@H]3CCC4=CC(=O)CC[C@]4(C)[C@@]3(F)C(O)C[C@]12C	FLUOXYMESTERONE	336.45	2.844	2	3		9.152	3.27	3.27
CSC1=CC2=C(SC3=CC=CC=C3N2CCC4CCCCN4C)C=C1	THIORIDAZINE HYDROCHLORIDE	370.57	6.203	0	2		11.369	5.12	7.12
CCC1NC(=O)C(C(O)C(C)CC=CC)N(C)C(=O)C(C(C)C)N(C)C(=O)C(CC(C)C)N(C)C(=O)C(CC(C)C)N(C)C(=O)C(C)NC(=O)C(C)NC(=O)C(CC(C)C)N(C)C(=O)C(NC(=O)C(CC(C)C)N(C)C(=O)CN(C)C1=O)C(C)C	CYCLOSPORINE	1202.63	14.36	5	23		33.332
CC(C)CC1=CC=C(C=C1)C(C)C(O)=O	IBUPROFEN	206.28	3.679	1	2		6.124	2.12	3.12
C[C@](N)(CC1=CC=C(O)C(=C1)O)C(O)=O	METHYLDOPA	211.22	-2.264	4	5		5.407	-1.49	-0.49
COCCC1=CC=C(OCC(O)CNC(C)C)C=C1	METOPROLOL TARTRATE	267.37	1.486	2	4		7.691	1.3	2.3
CCCNC(=O)N[S](=O)(=O)C1=CC=C(Cl)C=C1	CHLORPROPAMIDE	276.74	2.35	2	5		6.681	1.49	2.49
CC(CCC1=CC=CC=C1)NCC(O)C2=CC(=C(O)C=C2)C(N)=O	LABETALOL HYDROCHLORIDE	328.41	2.5	4	5		9.526	1.67	3.67
CCCC(=O)NC1=CC(=C(OCC(O)CNC(C)C)C=C1)C(C)=O	ACEBUTOLOL HYDROCHLORIDE	336.43	1.71	3	6		9.369	1.12	2.12
COC1=CC2=C(C=C1)[N](C(=C2CC(O)=O)C)C(=O)C3=CC=C(Cl)C=C3	INDOMETHACIN	357.79	4.18	1	5		9.505	2.86	5.86
CC1=CN=C(C=N1)C(=O)NCCC2=CC=C(C=C2)[S](=O)(=O)NC(=O)NC3CCCCC3	GLIPIZIDE	445.54	2.571	3	9		11.752	2.43	4.43
COC1=C(OC)C=C(CCN(C)CCCC(C#N)(C(C)C)C2=CC(=C(OC)C=C2)OC)C=C1	VERAPAMIL HYDROCHLORIDE	454.61	4.466	0	6		13.152	4.07	6.07
COC1=C(C=C(Cl)C=C1)C(=O)NCCC2=CC=C(C=C2)[S](=O)(=O)NC(=O)NC3CCCCC3	GLYBURIDE	494	4.239	3	8		12.819	4.42	6.42
CC1OC(=O)CC(O)CC(O)CC(O)CCC(O)C(O)CC(=O)CC(O)C(C(O)CC(OC2OC(C)C(O)C(N)C2O)C=CC=CC=CC=CCCC=CC=CC(C)C(O)C1C)C(O)=O	NYSTATIN	926.11	-1.295	12	18		24.088	3.16	3.16
NCCNCCNCCN	TRIENTINE HYDROCHLORIDE	146.24	-2.369	4	4		4.435	-1.14	-1.14
C[N+](C)(C)CC(O)CC(O)=O	LEVOCARNITINE	162.21	-4.767	2	4		4.223	-0.95	-0.95
CNNCC1=CC=C(C=C1)C(=O)NC(C)C	PROCARBAZINE HYDROCHLORIDE	221.3	-0.083	3	4		6.613	1.73	2.73
C[S](=O)(=O)OCCCCO[S](C)(=O)=O	BUSULFAN	246.29	-0.592	0	6		5.011	0.77	0.77
COC1=CC2=C(C[C@H]3[C@H]4CCCC[C@@]24CCN3C)C=C1	DEXTROMETHORPHAN HYDROBROMIDE	271.4	3.945	0	2		8.244	3.87	4.87
CCN(CC)CCNC(=O)C1=CC(=C(N)C=C1OC)Cl	METOCLOPRAMIDE HYDROCHLORIDE	299.8	2.229	2	5		8.185	1.44	2.44
OC(=O)CCCC1=CC=C(C=C1)N(CCCl)CCCl	CHLORAMBUCIL	304.21	3.631	1	3		7.939	3.23	4.23
CCOC(=O)C(CCC1=CC=CC=C1)NC(C)C(=O)N2CCCC2C(O)=O	ENALAPRIL MALEATE	376.45	0.667	2	7		10.155	1.95	2.95
CCN(CC)CCN1C(=O)CN=C(C2=CC=CC=C2F)C3=C1C=CC(=C3)Cl	FLURAZEPAM HYDROCHLORIDE	387.88	4.215	0	4		10.82	4.35	6.35
CC[P+](CC)(CC)[Au-]SC1OC(COC(C)=O)C(OC(C)=O)C(OC(C)=O)C1OC(C)=O	AURANOFIN	678.48	3.791	0	9		12.025
COC1=C2O[C](=O)C=CC2=CC3=C1OC=C3	METHOXSALEN	216.19	2.305	0	4		5.682	4.16	7.16
NC(N)=NC(=O)C1=C(N)N=C(N)C(=N1)Cl	AMILORIDE HYDROCHLORIDE ANHYDROUS	229.63	-2.222	4	8		5.539	0.07	1.07
ClC1=C(NC2=NCCN2)C(=CC=C1)Cl	CLONIDINE HYDROCHLORIDE	230.09	1.727	2	3		5.814	3.34	4.34
NC(=N)NC(=O)CC1=C(Cl)C=CC=C1Cl	GUANFACINE HYDROCHLORIDE	246.09	1.37	3	4		6.027	2.35	3.35
CN(C)CC\C=C1\C2=CC=CC=C2COC3=CC=CC=C13	DOXEPIN HYDROCHLORIDE	279.38	4.092	0	2		8.841	4.87	6.87
CC1=C(Cl)C(=C(Cl)C=C1)NC2=CC=CC=C2C(O)=O	MECLOFENAMATE SODIUM	296.15	6.256	2	3		7.668	3.44	5.44
CN1C(=O)C(O)N=C(C2=CC=CC=C2)C3=C1C=CC(=C3)Cl	TEMAZEPAM	300.74	2.34	1	4		8.27	5.01	7.01
COC1=C2O[C@H]3C(=O)CC[C@@]4(O)[C@H]5CC(=C2[C@@]34CCN5C)C=C1	OXYCODONE HYDROCHLORIDE	315.37	-0.039	1	5		8.408	0.57	1.57
CCCCC(C)(O)CC=CC1C(O)CC(=O)C1CCCCCCC(=O)OC	MISOPROSTOL	382.54	3.072	2	5		10.709	5.26	5.26
ClC1=CC=C(NC(=N)NC(=N)NCCCCCCNC(=N)NC(=N)NC2=CC=C(Cl)C=C2)C=C1	CHLORHEXIDINE GLUCONATE	505.45	4.81	10	10		13.798	2.64	4.64
NC12CC3CC(CC(C3)C1)C2	AMANTADINE HYDROCHLORIDE	151.25	1.995	1	1		4.652	0.19	0.19
CN1CC[C@@]23[C@H]4OC5=C(O)C=CC(=C25)C[C@@H]1[C@@H]3C=CC4O	MORPHINE SULFATE	285.34	0.572	2	4		7.883	0.47	1.47
OC(CCN1CCCCC1)(C2CCCCC2)C3=CC=CC=C3	TRIHEXYPHENIDYL HYDROCHLORIDE	301.47	5.151	1	2		9.349	4.41	5.41
CNCCC(OC1=CC=C(C=C1)C(F)(F)F)C2=CC=CC=C2	FLUOXETINE HYDROCHLORIDE	309.33	4.566	1	2		8.087	4.88	6.88
OC(=O)C1=C[N](C2CC2)C3=CC(=C(F)C=C3[C]1=O)N4CCNCC4	CIPROFLOXACIN HYDROCHLORIDE	331.35	-0.725	2	6		8.716	0.84	2.84
NC(N)=NC1=NC(=CS1)CSCCC(N)=N[S](N)(=O)=O	FAMOTIDINE	337.44	-0.581	4	9		8.142	1.71	2.71
ClC1=CC=CC(=C1)N2CCN(CCC[N]3N=C4C=CC=C[N]4[C]3=O)CC2	TRAZODONE HYDROCHLORIDE	371.87	3.85	0	6		10.406	3.04	6.04
C[C@H](CCC(O)=O)[C@H]1CC[C@H]2[C@@H]3[C@@H](O)C[C@@H]4C[C@H](O)CC[C@]4(C)[C@H]3CC[C@]12C	URSODIOL	392.58	4.514	3	4		11.094	2.91	2.91
NCCCCC(NC(CCC1=CC=CC=C1)C(O)=O)C(=O)N2CCCC2C(O)=O	LISINOPRIL	405.5	-1.822	4	8		10.988	0.15	1.15
OCCN1CCN(CCCN2C3=CC=CC=C3SC4=C2C=C(C=C4)C(F)(F)F)CC1	FLUPHENAZINE HYDROCHLORIDE	437.53	4.318	1	4		11.595	5.04	7.04
CN1CCN(CC\C=C2\C3=CC=CC=C3SC4=C2C=C(C=C4)[S](=O)(=O)N(C)C)CC1	THIOTHIXENE	443.62	3.228	0	5		12.782	5.64	7.64
CC(S)C(O)=NCC(O)=O	TIOPRONIN	163.19	0.016	2	4		3.836	-0.69	-0.69
ClC1=CC2=C(O[C](=O)[NH]2)C=C1	CHLORZOXAZONE	169.56	1.871	1	3		4.084	2.11	4.11
NC1=CC(=NC(=[N]1=O)N)N2CCCCC2	MINOXIDIL	209.25	0.021	2	6		5.781	0.97	1.97
CC(C)NCC(O)C1=CC(=CC(=C1)O)O	METAPROTERENOL SULFATE	211.26	0.083	4	4		5.836	-1.31	-0.31
NCC(CC(O)=O)C1=CC=C(Cl)C=C1	BACLOFEN	213.66	-0.62	2	3		5.593	-0.65	0.35
NC1=NC(=C2N=C(C3=CC=CC=C3)C(=NC2=N1)N)N	TRIAMTERENE	253.27	1.608	3	7		7.149	0.63	3.63
CN(C)CCC=C1C2=CC=CC=C2C=CC3=CC=CC=C13	CYCLOBENZAPRINE HYDROCHLORIDE	275.39	5.097	0	1		9.127	6.38	8.38
CNCCCC12CCC(C3=CC=CC=C13)C4=CC=CC=C24	MAPROTILINE HYDROCHLORIDE	277.41	4.524	1	1		8.924	4.94	6.94
OC1N=C(C2=CC=CC=C2)C3=C(NC1=O)C=CC(=C3)Cl	OXAZEPAM	286.72	2.305	2	4		7.806	3.96	5.96
OC1N=C(C2=CC=CC=C2Cl)C3=C(NC1=O)C=CC(=C3)Cl	LORAZEPAM	321.16	2.368	2	4		8.297	4.76	6.76
CN1CCN(CC1)C2=NC3=CC=CC=C3OC4=C2C=C(Cl)C=C4	LOXAPINE SUCCINATE	327.81	3.981	0	4		9.201	5.39	7.39
CC1(C)S[C@@H]2C(NC(=O)C(N)C3=CC=CC=C3)C(=O)N2C1C(O)=O	AMPICILLIN TRIHYDRATE	349.41	-1.204	3	7		9.144	-0.07	0.93
OC1(CCN(CCCC(=O)C2=CC=C(F)C=C2)CC1)C3=CC=C(Cl)C=C3	HALOPERIDOL LACTATE	375.87	3.849	1	3		10.261	4.62	6.62
CC(=O)O[C@@]1(CC[C@H]2[C@@H]3C=C(C)C4=CC(=O)CC[C@]4(C)[C@H]3CC[C@]12C)C(C)=O	MEGESTROL ACETATE	384.52	3.772	0	4		10.656	6.45	6.45
OCCN1CCN(CCCN2C3=CC=CC=C3SC4=C2C=C(Cl)C=C4)CC1	PERPHENAZINE	403.97	4.007	1	4		11.576	5.12	7.12
CN(C)C1[C@@H]2C[C@H]3C(=C(O)[C@]2(O)C(=O)C(=C1O)C(N)=O)C(=O)C4=C(O)C=CC=C4[C@@]3(C)O	TETRACYCLINE HYDROCHLORIDE	444.44	-0.896	6	10		11.288	3.47	4.47
CC(C)(C)NCC(O)C1=CC(=C(O)C=C1)CO	ALBUTEROL SULFATE	239.31	0.061	4	4		6.763	-1.02	-0.02
CCCCNC(=O)N[S](=O)(=O)C1=CC=C(C)C=C1	TOLBUTAMIDE	270.35	2.497	2	5		7.117	2.27	3.27
CN\C(NCCSCC1=CC=C(CN(C)C)O1)=C/[N](=O)=O	RANITIDINE HYDROCHLORIDE	314.4	0.67	2	7		8.651	0.24	1.24
CN1CCN(CC1)C2=NC3=CC(=CC=C3NC4=CC=CC=C24)Cl	CLOZAPINE	326.83	3.564	1	4		9.417	4.37	6.37
COC1=C(OC)C=C2C(=NC(=NC2=C1)N3CCN(CC3)C(=O)C4=CC=CO4)N	PRAZOSIN HYDROCHLORIDE	383.41	2.028	1	9		10.197	2.59	5.59
CO\N=C(/C(=O)NC1[C@H]2SCC(=C(N2C1=O)C(O)=O)COC(N)=O)C3=CC=CO3	CEFUROXIME AXETIL	424.38	0.229	3	12		10.174	-0.06	0.94
CC(C[N+](C)(C)C)OC(N)=O	BETHANECHOL CHLORIDE	161.22	-4.01	1	4		4.439	0.19	0.19
CN1CCCC1C2=CN=CC=C2	NICOTINE	162.24	0.883	0	2		4.988	0.56	1.56
CN(C)C1=NC(=NC(=N1)N(C)C)N(C)C	ALTRETAMINE	210.28	1.665	0	6		5.944	1.64	2.64
CC1=N[S](=O)(=O)C2=C(N1)C=CC(=C2)Cl	DIAZOXIDE	230.67	1.421	1	4		5.363	0.71	1.71
CC(C)NCC(O)COC1=CC=C(CC(N)=O)C=C1	ATENOLOL	266.34	-0.109	3	5		7.478	-0.09	0.91
COC1=CC(=CC(=C1OC)OC)CC2=CN=C(N)N=C2N	TRIMETHOPRIM	290.32	0.981	2	7		7.829	2.01	4.01
CC(CN(C)C)CN1C2=CC=CC=C2CCC3=CC=CC=C13	TRIMIPRAMINE MALEATE	294.44	5.436	0	2		9.47	5.87	7.87
OC(=O)C1=CC(=CC=C1O)N=NC2=CC=C(O)C(=C2)C(O)=O	OLSALAZINE SODIUM	302.24	4.574	4	8		7.827	-0.41	1.59
OC(C[N]1C=NC=N1)(C[N]2C=NC=N2)C3=C(F)C=C(F)C=C3	FLUCONAZOLE	306.28	-0.44	1	7		7.301	1.7	4.7
CC(C)(C)NC[C@H](O)COC1=NSN=C1N2CCOCC2	TIMOLOL MALEATE	316.42	1.531	2	7		8.197	1.51	2.51
COC1=CC2=C(C=C1)N=C([NH]2)[S](=O)CC3=NC=C(C)C(=C3C)OC	OMEPRAZOLE MAGNESIUM	345.42	2.565	1	6		9.36	3.73	6.73
CC\1=C(CC(O)=O)C2=CC(=CC=C2C1=C\C3=CC=C(C=C3)[S](C)=O)F	SULINDAC	356.41	3.157	1	3		9.878	2.15	4.15
CCN(CC)CC#CCOC(=O)C(O)(C1CCCCC1)C2=CC=CC=C2	OXYBUTYNIN CHLORIDE	357.49	4.687	1	4		10.516	7.59	8.59
COC1=C(OC)C=C2C(=NC(=NC2=C1)N3CCN(CC3)C(=O)C4COC5=CC=CC=C5O4)N	DOXAZOSIN MESYLATE	451.48	3.532	1	10		12.039	3.84	6.84
CN(C)C1[C@@H]2C[C@@H]3CC4=C(C(=CC=C4N(C)C)O)C(=O)C3=C(O)[C@]2(O)C(=O)C(=C1O)C(N)=O	MINOCYCLINE HYDROCHLORIDE	457.48	0.206	5	10		11.968	1.58	2.58
NC1=NC2=C(N(C=O)C(CNC3=CC=C(C=C3)C(=O)NC(CCC(O)=O)C(O)=O)CN2)[C](=O)[NH]1	LEUCOVORIN CALCIUM	473.45	-1.452	7	14		11.744	-0.56	1.44
NC[C@H]1O[C@H](O[C@@H]2[C@@H](N)C[C@@H](N)[C@H](O)[C@H]2O[C@@H]3O[C@H](CO)[C@@H](O[C@H]4O[C@@H](CN)[C@@H](O)[C@H](O)[C@H]4N)[C@H]3O)[C@H](N)[C@@H](O)[C@@H]1O	NEOMYCIN SULFATE	614.65	-6.466	13	19		14.338	1.6	1.6
OCC1CCC(O1)[N]2C=NC3=C2[NH]C=N[C]3=O	DIDANOSINE	236.23	-0.849	2	7		5.834	0.01	2.01
CCOC(=O)C1=C(C)NC(=C(C1C2=C(Cl)C(=CC=C2)Cl)C(=O)OC)C	FELODIPINE	384.25	5.297	1	5		9.907	5.82	6.82
CCOC(=O)C(CCC1=CC=CC=C1)NC(C)C(=O)N2[C@H]3CCC[C@H]3CC2C(O)=O	RAMIPRIL	416.52	1.54	2	7		11.369	3.08	4.08
CCC(C)(C)C(=O)OC1CC(C)C=C2C=CC(C)C(CCC3CC(O)CC(=O)O3)[C@@H]12	SIMVASTATIN	418.57	4.481	1	5		11.72	8.58	8.58
CCOC(=O)C(CCC1=CC=CC=C1)NC2CCC3=CC=CC=C3N(CC(O)=O)C2=O	BENAZEPRIL HYDROCHLORIDE	424.5	1.824	2	7		11.739	2.99	4.99
CCOC(=O)C(CCC1=CC=CC=C1)NC(C)C(=O)N2CC3=CC=CC=C3CC2C(O)=O	QUINAPRIL HYDROCHLORIDE	438.52	1.736	2	7		12.203	3.25	5.25
CN(C)C(=O)C(CCN1CCC(O)(CC1)C2=CC=C(Cl)C=C2)(C3=CC=CC=C3)C4=CC=CC=C4	LOPERAMIDE HYDROCHLORIDE	477.05	4.662	1	4		14.053	4.32	7.32
CN1CC(C[C@H]2[C@H]1CC3=C[NH]C4=CC=CC2=C34)C(=O)N[C@]5(C)O[C@@]6(O)[C@@H]7CCCN7C(=O)C(CC8=CC=CC=C8)N6C5=O	DIHYDROERGOCORNINE MESYLATE	583.69	4.765	3	10		16.131	4.84	7.84
CCC1OC(=O)C(C)C(O[C@H]2C[C@@](C)(OC)C(O)C(C)O2)C(C)C(O[C@@H]3OC(C)CC(C3O)N(C)C)[C@@](C)(CC(C)C(=O)C(C)C(O)[C@]1(C)O)OC	CLARITHROMYCIN	747.96	2.374	4	14		19.394	4.34	4.34
NC1=CC(=C(O)C=C1)C(O)=O	MESALAMINE	153.14	1.056	3	4		3.863	-1.16	-0.16
CC(C)NCC(O)COC1=CC=CC2=C1C=C[NH]2	PINDOLOL	248.33	1.671	3	4		7.264	1.34	3.34
OC(=O)C1=C(O)C=CC(=C1)C2=C(F)C=C(F)C=C2	DIFLUNISAL	250.2	4.397	2	3		6.036	0.92	2.92
CNCCC=C1C2=CC=CC=C2CCC3=CC=CC=C13	NORTRIPTYLINE HYDROCHLORIDE	263.38	4.315	1	1		8.688	3.75	5.75
OC(=O)CCC1=NC(=C(O1)C2=CC=CC=C2)C3=CC=CC=C3	OXAPROZIN	293.32	2.948	1	4		8.294	3.41	6.41
CNC1CCC(C2=CC(=C(Cl)C=C2)Cl)C3=CC=CC=C13	SERTRALINE HYDROCHLORIDE	306.23	5.347	1	1		8.693	5.7	7.7
ClC1=CC2=C(OC3=CC=CC=C3N=C2N4CCNCC4)C=C1	AMOXAPINE	313.79	3.406	1	4		8.737	3.61	5.61
CN1CCCC1CCO[C@](C)(C2=CC=CC=C2)C3=CC=C(Cl)C=C3	CLEMASTINE FUMARATE	343.9	5.447	0	2		10.21	6.1	8.1
CC(C)(C)NC(=O)C1CC[C@H]2[C@@H]3CC[C@H]4NC(=O)C=C[C@]4(C)[C@H]3CC[C@]12C	FINASTERIDE	372.55	3.013	2	4		10.995	6.27	6.27
CCOC(=O)C1=C(COCCN)NC(=C(C1C2=CC=CC=C2Cl)C(=O)OC)C	AMLODIPINE BESYLATE	408.88	3.434	2	7		10.865	3.18	4.18
COC1=CC=C(C=C1)C2SC3=CC=CC=C3N(CCN(C)C)C(=O)C2OC(C)=O	DILTIAZEM HYDROCHLORIDE	414.52	3.647	0	6		11.582	5	7
C[C@]12CC[C@H]3[C@@H](CCC4=CC(=CC=C34)OC(=O)N(CCCl)CCCl)[C@@H]1CCC2O	ESTRAMUSTINE PHOSPHATE SODIUM	440.41	4.92	1	4		11.734	7.63	8.63
COC(=O)C1=C(C)NC(=C(C1C2=CC(=CC=C2)[N](=O)=O)C(=O)OCCN(C)CC3=CC=CC=C3)C	NICARDIPINE HYDROCHLORIDE	479.53	5.23	1	9		13.343	5.34	7.34
CCC(C)[N]1N=C[N]([C]1=O)C2=CC=C(C=C2)N3CCN(CC3)C4=CC=C(OCC5CO[C@@](C[N]6C=NC=N6)(O5)C7=C(Cl)C=C(Cl)C=C7)C=C4	ITRACONAZOLE	705.64	5.99	0	12		18.815	6.72	11.72
CC1OC(CC(O)C1O)OC2C(O)CC(OC2C)OC3C(O)CC(OC3C)OC4CC[C@@]5(C)[C@H](CC[C@@H]6[C@@H]5CC(O)[C@]7(C)C(CC[C@]67O)C8=CC(=O)OC8)C4	DIGOXIN	780.95	1.423	6	14		19.851	2.63	2.63
COC1C=CO[C@@]2(C)OC3=C(C2=O)C4=C(C(=C3C)O)C(=O)C(=C5NC6(CCN(CC6)CC(C)C)N=C45)NC(=O)C(=CC=CC(C)C(O)C(C)C(O)C(C)C(OC(C)=O)C1C)C	RIFABUTIN	847.02	4.732	5	15		22.612	4.71	5.71
NCC1(CCCCC1)CC(O)=O	GABAPENTIN	171.24	-0.66	2	3		4.732	0.12	0.12
OC1CO[C@@H]2C(CO[C@H]12)O[N+]([O-])=O	ISOSORBIDE MONONITRATE	191.14	-2.514	1	7		3.829	0.93	0.93
C[N]1N=C(S[C]1=NC(C)=O)[S](N)(=O)=O	METHAZOLAMIDE	236.26	0.088	1	7		5.416	-0.41	0.59
NC(=O)OCC(COC(N)=O)C1=CC=CC=C1	FELBAMATE	238.24	0.497	2	6		6.123	1.64	2.64
CC1=CC(=C(C)C=C1)OCCCC(C)(C)C(O)=O	GEMFIBROZIL	250.34	3.937	1	3		7.205	4.37	5.37
CC(C(O)=O)C1=CC(=CC=C1)C(=O)C2=CC=CC=C2	KETOPROFEN	254.28	2.761	1	3		7.279	1.87	3.87
C[N]1C(=CC=C1C(=O)C2=CC=C(C)C=C2)CC(O)=O	TOLMETIN SODIUM	257.29	2.206	1	4		7.173	1.94	3.94
C[N]1C2=C(C(=O)C(CC2)C[N]3C=CN=C3C)C4=CC=CC=C14	ONDANSETRON HYDROCHLORIDE	293.37	2.716	0	4		8.641	2.59	5.59
CN(C)C(=O)CC1=C(N=C2C=CC(=C[N]12)C)C3=CC=C(C)C=C3	ZOLPIDEM TARTRATE	307.4	3.026	0	4		9.293	4.36	7.36
CC(C)NCC(O)COC1=CC=C(COCCOC(C)C)C=C1	BISOPROLOL FUMARATE	325.45	1.791	2	5		9.235	1.84	2.84
CN1C(=C(O)C2=C(C=CC=C2)[S]1(=O)=O)C(=O)NC3=NC=CC=C3	PIROXICAM	331.35	1.888	2	7		8.288	1.02	3.02
C[C@]12CC[C@H]3[C@@H](CCC4=CC(=CC=C34)O[S](O)(=O)=O)[C@@H]1CCC2=O	ESTROPIPATE	350.43	1.822	1	5		8.936	3.45	4.45
CCCC(NC(C)C(=O)N1[C@H]2CCCC[C@H]2CC1C(O)=O)C(=O)OCC	PERINDOPRIL ERBUMINE	368.47	1.21	2	7		9.786	2.04	2.04
CCOC(=O)N1CCC(CC1)=C2C3=C(CCC4=C2N=CC=C4)C=C(Cl)C=C3	LORATADINE	382.89	5.051	0	4		10.835	7.62	9.62
CC1=C(CCN2CCC(CC2)C3=NOC4=C3C=CC(=C4)F)[C](=O)[N]5CCCCC5=N1	RISPERIDONE	410.49	2.711	0	6		11.276	2.47	5.47
NCCS	CYSTEAMINE BITARTRATE	77.15	-0.252	1	1		2.28	-1.03	-1.03
CCC1(C)CC(=O)NC1=O	ETHOSUXIMIDE	141.17	0.395	1	3		3.687	0.6	0.6
CCC1C(COC1=O)CC2=CN=C[N]2C	PILOCARPINE HYDROCHLORIDE	208.26	-0.203	0	4		5.629	2.39	3.39
CC1=C[N](C2OC(CO)C=C2)[C](=O)[NH][C]1=O	STAVUDINE	224.22	-0.488	2	6		5.579	0.11	1.11
O=[N](=O)OCC(CO[N](=O)=O)O[N](=O)=O	NITROGLYCERIN	227.09	1.76	0	12		3.863	4.9	4.9
CC(C(O)=O)C1=CC(=C(C=C1)C2=CC=CC=C2)F	FLURBIPROFEN	244.26	3.754	1	2		6.795	2.07	4.07
NC1=CC=C(C=C1)[S](=O)(=O)NC2=NC=CC=N2	SULFADIAZINE	250.28	0.1	2	6		6.388	0.65	2.65
CN=C(NCCSCC1=C(C)[NH]C=N1)NC#N	CIMETIDINE	252.34	0.19	3	6		6.902	1.01	2.01
CCCCCC1=CC2=C([C@@H]3C=C(C)CC[C@H]3C(C)(C)O2)C(=C1)O	DRONABINOL	314.47	7.238	1	2		9.572	7.25	8.25
CC\C(C1=CC=CC=C1)=C(/C2=CC=CC=C2)C3=CC=C(OCCN(C)C)C=C3	TAMOXIFEN CITRATE	371.52	6.818	0	2		12.07	7.46	10.46
CC(C)[N]1C2=CC=CC=C2C(=C1C=CC(O)CC(O)CC(O)=O)C3=CC=C(F)C=C3	FLUVASTATIN SODIUM	411.47	4.048	3	5		11.516	2.33	5.33
CCC1OC(=O)C(C)C(OC2C[C@@](C)(OC)C(O)C(C)O2)C(C)C(OC3OC(C)CC(C3O)N(C)C)[C@](C)(O)CC(C)CN(C)C(C)C(O)[C@]1(C)O	AZITHROMYCIN DIHYDRATE	749	2.638	5	14		19.727	5.24	5.24
NC(CC1=CC(=C(OC2=CC(=C(O)C(=C2)I)I)C(=C1)I)I)C(O)=O	LEVOTHYROXINE SODIUM	776.87	3.508	3	5		12.681	2.07	4.07
COC1CC(CCC1O)C=C(C)C2OC(=O)C3CCCCN3C(=O)C(=O)[C@]4(O)OC(C(CC(C)CC(=CC(CC=C)C(=O)CC(O)C2C)C)OC)C(CC4C)OC	TACROLIMUS	804.03	5.776	3	13		21.535	5.99	5.99
NC1=CC(=C(C=C1)C(O)=O)O	AMINOSALICYLIC ACID	153.14	1.056	3	4		3.863	-1.26	-0.26
CC(N)COC1=C(C)C=CC=C1C	MEXILETINE HYDROCHLORIDE	179.26	2.569	1	2		5.529	2.8	3.8
NC1=N[C](=O)[N](C=C1)C2CSC(CO)O2	LAMIVUDINE	229.25	-1.462	2	6		5.639	-0.36	0.64
NC1=NC2=C(S1)C=C(OC(F)(F)F)C=C2	RILUZOLE	234.2	3.235	1	3		5.007	5.94	7.94
NCCCC(O)([P](O)(O)=O)[P](O)(O)=O	ALENDRONATE SODIUM	249.1	-5.642	6	8		4.748	0.11	0.11
NC1=NC(=C(N=N1)C2=C(Cl)C(=CC=C2)Cl)N	LAMOTRIGINE	256.09	2.534	2	5		6.287	3.35	5.35
COC1=CC=CC(=C1)[C@@]2(O)CCCCC2CN(C)C	TRAMADOL HYDROCHLORIDE	263.38	3.1	1	3		7.824	2.37	3.37
OC(=O)CC1=CC=CC=C1NC2=C(Cl)C=CC=C2Cl	DICLOFENAC SODIUM	296.15	4.576	2	3		7.668	3.3	5.3
CC(=O)CC(C1=CC=CC=C1)C2=C(O)C3=C(O[C]2=O)C=CC=C3	WARFARIN SODIUM	308.33	2.901	1	4		8.718	2.38	5.38
CC(C)C(N)C(=O)OCCOC[N]1C=NC2=C1[NH]C(=N[C]2=O)N	VALACYCLOVIR HYDROCHLORIDE	324.34	-1.402	3	10		8.176	1.39	3.39
OC1=C(C2CCC(CC2)C3=CC=C(Cl)C=C3)C(=O)C4=CC=CC=C4C1=O	ATOVAQUONE	366.84	6.351	1	3		10.022	6.61	8.61
NC(C(=O)NC1[C@H]2SCC(=C(N2C1=O)C(O)=O)Cl)C3=CC=CC=C3	CEFACLOR	367.8	-1.636	3	7		9.223	-0.02	0.98
CC1=C(OCC(F)(F)F)C=CN=C1C[S](=O)C2=NC3=CC=CC=C3[NH]2	LANSOPRAZOLE	369.36	2.598	1	5		8.789	4.69	7.69
COC(=O)C1=C(C)NC(=C(C1C2=CC=CC=C2[N](=O)=O)C(=O)OCC(C)C)C	NISOLDIPINE	388.42	4.582	1	8		10.463	5.87	6.87
NC1=NC(=CS1)C(=CCC(O)=O)C(=O)NC2[C@H]3SCC=C(N3C2=O)C(O)=O	CEFTIBUTEN DIHYDRATE	410.42	-1.21	4	10		9.96	-0.26	0.74
CCCCC1=NC(=C(CO)[N]1CC2=CC=C(C=C2)C3=CC=CC=C3C4=N[NH]N=N4)Cl	LOSARTAN POTASSIUM	422.92	3.862	2	7		11.664	3.81	7.81
CC(O)(C[S](=O)(=O)C1=CC=C(F)C=C1)C(=O)NC2=CC(=C(C=C2)C#N)C(F)(F)F	BICALUTAMIDE	430.37	2.707	2	6		9.489	4.33	6.33
COC1=C(C\C=C(/C)CCC(=O)OCCN2CCOCC2)C(=C3C(=O)OCC3=C1C)O	MYCOPHENOLATE MOFETIL	433.5	2.98	1	8		11.399	5.23	6.23
NC1=N[C](=O)C2=NC(=CN=C2[NH]1)CNC3=CC=C(C=C3)C(=O)NC(CCC(O)=O)C(O)=O	FOLIC ACID	441.4	-2.31	6	13		11.023	-0.6	2.4
CCOC(=O)C(CCC1=CC=CC=C1)NC(C)C(=O)N2CC3=CC(=C(OC)C=C3CC2C(O)=O)OC	MOEXIPRIL HYDROCHLORIDE	498.58	1.394	2	9		13.436	2.96	4.96
CC(C)(C)N=C(O)[C@@H]1C[C@@H]2CCCC[C@@H]2CN1C[C@@H](O)[C@H](CC3=CC=CC=C3)N=C(O)[C@H](CC(O)=N)NC(=O)C4=NC5=CC=CC=C5C=C4	SAQUINAVIR MESYLATE	670.86	5.845	6	11		18.949	4.87	7.87
NC(=N)NCCCC(NC(=O)C1CCCN1C(=O)C2CSSCCC(=O)NC(CC3=CC=C(O)C=C3)C(=O)NC(CC4=CC=CC=C4)C(=O)NC(CCC(N)=O)C(=O)NC(CC(N)=O)C(=O)N2)C(=O)NCC(N)=O	DESMOPRESSIN ACETATE	1069.22	-3.144	14	26		27.757
CC1OC1[P](O)(O)=O	FOSFOMYCIN TROMETHAMINE	138.06	-0.228	2	4		2.641	-0.62	-0.62
CCC(C(O)=O)C1=CC=CC=C1	SODIUM PHENYLBUTYRATE	164.2	2.252	1	2		4.733	0.86	1.86
CC(CC1=CC=CC=C1)N(C)CC#C	SELEGILINE HYDROCHLORIDE	187.29	2.844	0	1		6.101	4.77	5.77
OCCN1CC(O)C(O)C(O)C1CO	MIGLITOL	207.23	-1.256	5	6		4.845	-1.3	-1.3
CC(CS)C(=O)N1CCCC1C(O)=O	CAPTOPRIL	217.28	0.89	1	4		5.574	-0.14	-0.14
CC(N(O)C(N)=O)C1=CC2=CC=CC=C2S1	ZILEUTON	236.29	2.483	2	4		6.503	2.91	4.91
CC(NC(C)(C)C)C(=O)C1=CC(=CC=C1)Cl	BUPROPION HYDROCHLORIDE	239.74	3.211	1	2		6.831	4.9	5.9
COC1=CC(=C(OC)C=C1)C(O)CNC(=O)CN	MIDODRINE HYDROCHLORIDE	254.29	-0.354	3	6		6.704	-0.08	0.92
CCCSC1=CC2=C(C=C1)N=C(NC(=O)OC)[NH]2	ALBENDAZOLE	265.33	3.461	2	5		7.278	4.59	6.59
CN1CCN2C(C1)C3=CC=CC=C3CC4=C2N=CC=C4	MIRTAZAPINE	265.36	2.814	0	3		8.154	4.2	6.2
C[C@]12CC[C@H]3[C@@H](CCC4=C3C=CC(=C4)O)[C@@H]1CCC2O	ESTRADIOL	272.39	3.784	2	2		8.028	4.29	5.29
CN(C\C=C\C#CC(C)(C)C)CC1=CC=CC2=CC=CC=C12	TERBINAFINE HYDROCHLORIDE	291.44	5.96	0	1		9.771	9.12	11.12
CC(C)(C#N)C1=CC(=CC(=C1)C[N]2C=NC=N2)C(C)(C)C#N	ANASTROZOLE	293.37	1.475	0	5		8.409	6.14	8.14
CN1[C@@H]2CC[C@H]1CC(C2)OC(C3=CC=CC=C3)C4=CC=CC=C4	BENZTROPINE MESYLATE	307.44	3.52	0	2		9.541	5.01	7.01
CN(C)CCCN1C2=CC=CC=C2CCC3=C1C=C(Cl)C=C3	CLOMIPRAMINE HYDROCHLORIDE	314.86	5.921	0	2		9.498	5.2	7.2
CC1(C)NC(=O)N(C1=O)C2=CC(=C(C=C2)[N](=O)=O)C(F)(F)F	NILUTAMIDE	317.22	1.708	1	7		6.761	4.37	5.37
COC1=C(C)C(=C(\C=C\C(C)=C\C=C\C(C)=C\C(O)=O)C(=C1)C)C	ACITRETIN	326.44	6.065	1	3		10.646	5.54	6.54
FC1=CC=C(C=C1)C2CCNCC2COC3=CC4=C(OCO4)C=C3	PAROXETINE HYDROCHLORIDE	329.37	4.238	1	4		8.935	3.31	5.31
CN\C(NCCSCC1=CSC(=N1)CN(C)C)=C/[N](=O)=O	NIZATIDINE	331.45	-0.162	2	7		9.035	-0.04	0.96
C[C@]12CC3=C(ON=C3)C=C1CC[C@@H]4[C@@H]2CC[C@@]5(C)[C@H]4CC[C@@]5(O)C#C	DANAZOL	337.46	3.747	1	3		9.795	8.51	9.51
CC1COC2=C3[N]1C=C(C(O)=O)[C](=O)C3=CC(=C2N4CCN(C)CC4)F	LEVOFLOXACIN	361.37	-0.508	1	7		9.293	1.04	3.04
CC1=C(N2[C@H](SC1)C(NC(=O)C(N)C3=CC=C(O)C=C3)C2=O)C(O)=O	CEFADROXIL HEMIHYDRATE	363.39	-2.507	4	8		9.348	-0.14	0.86
CCCCNC1=C(OC2=CC=CC=C2)C(=CC(=C1)C(O)=O)[S](N)(=O)=O	BUMETANIDE	364.42	3.372	3	7		9.471	2.01	4.01
CC1CC2=CC=CC=C2N1NC(=O)C3=CC(=C(Cl)C=C3)[S](N)(=O)=O	INDAPAMIDE	365.83	2.957	2	6		9.383	3.8	5.8
CN1CCN(CCCN2C3=CC=CC=C3SC4=C2C=C(Cl)C=C4)CC1	PROCHLORPERAZINE MALEATE	373.94	4.582	0	3		10.959	6.31	8.31
COC1=C(OC)C=C2C(=O)C(CC3CCN(CC3)CC4=CC=CC=C4)CC2=C1	DONEPEZIL HYDROCHLORIDE	379.5	4.598	0	4		11.121	4.98	6.98
CCOC(=O)C(CCC1=CC=CC=C1)NC(C)C(=O)N2[C@H]3CCCC[C@@H]3CC2C(O)=O	TRANDOLAPRIL	430.55	2.099	2	7		11.833	3.18	4.18
OC(COC1=CC=CC2=C1[C](=O)C=C(O2)C(O)=O)COC3=C4[C](=O)C=C(OC4=CC=C3)C(O)=O	CROMOLYN SODIUM	468.37	1.481	3	11		11.305	-0.09	3.91
CC(C)C1=C(C(=O)NC2=CC=CC=C2)C(=C([N]1CCC(O)CC(O)CC(O)=O)C3=CC=C(F)C=C3)C4=CC=CC=C4	ATORVASTATIN CALCIUM	558.65	4.457	4	7		15.668	3.35	7.35
COC1=C(CC2=C[N](C)C3=C2C=C(NC(=O)OC4CCCC4)C=C3)C=CC(=C1)C(=O)N[S](=O)(=O)C5=CC=CC=C5C	ZAFIRLUKAST	575.68	7.092	2	9		15.74	4.45	8.45
OC1COC(OC2COC(O)C(O[S](O)(=O)=O)C2O[S](O)(=O)=O)C(O[S](O)(=O)=O)C1O[S](O)(=O)=O	PENTOSAN POLYSULFATE SODIUM	602.47	-4.452	6	21		9.941	-0.14	-0.14
CC(C)(C)NC(=O)C1CN(CCN1CC(O)CC(CC2=CC=CC=C2)C(=O)NC3C(O)CC4=CC=CC=C34)CC5=CN=CC=C5	INDINAVIR SULFATE	613.8	3.681	4	9		17.81	4.06	7.06
CC[C@H](C)[C@H]1O[C@]2(CC[C@@H]1C)C[C@@H]3C[C@@H](C\C=C(/C)[C@@H](O[C@H]4C[C@H](OC)[C@@H](O[C@H]5C[C@H](OC)[C@@H](O)[C@H](C)O5)[C@H](C)O4)[C@@H](C)\C=C\C=C6/CO[C@@H]7[C@H](O)C(=C[C@@H](C(=O)O3)[C@]67O)C)O2	IVERMECTIN	875.11	5.388	3	14		23.122	6.25	6.25
NC(N)=O	UREA C-14	60.06	-1.66	2	3		1.414	-1.56	-1.56
OC(=O)C1=CN=CC=C1	NIACIN	123.11	0.799	1	3		3.13	-0.34	0.66
NC1=N[C](=O)C2=C([NH]1)[N](COCCO)C=N2	ACYCLOVIR	225.21	-2.205	3	8		5.452	-0.64	1.36
ClC1=C(NC2=NCCN2)C3=NSN=C3C=C1	TIZANIDINE HYDROCHLORIDE	253.71	2.318	2	5		6.398	2.19	4.19
ClC1=CC=C2N=C3NC(=O)CN3CC2=C1Cl	ANAGRELIDE HYDROCHLORIDE	256.09	1.022	1	4		6.136	3.84	4.84
CCCN(CCC)CCC1=C2CC(=O)NC2=CC=C1	ROPINIROLE HYDROCHLORIDE	260.38	2.796	1	3		7.922	2.88	3.88
COC1=CC=C(C=C1)C(CN(C)C)C2(O)CCCCC2	VENLAFAXINE HYDROCHLORIDE	277.41	3.269	1	3		8.288	2.6	3.6
C[N]1C=NC2=C1[C](=O)[N](CCCCC(C)=O)[C](=O)[N]2C	PENTOXIFYLLINE	278.31	0.116	0	7		7.345	1.59	3.59
N#CC1=CC=C(C=C1)C([N]2C=NC=N2)C3=CC=C(C=C3)C#N	LETROZOLE	285.31	1.429	0	5		8.137	4.27	7.27
CC1C2CC3=CC=C(O)C=C3[C@]1(C)CCN2CC=C(C)C	PENTAZOCINE HYDROCHLORIDE	285.43	4.667	1	2		8.86	4.24	5.24
CCC1=C2[NH]C3=C(CCOC3(CC)CC(O)=O)C2=CC=C1	ETODOLAC	287.36	3.432	2	4		8.145	2.41	4.41
ClC1=CC2=C(C=C1)[N]3C=NN=C3CN=C2C4=CC=CC=C4	ESTAZOLAM	294.74	2.286	0	4		8.376	3.88	6.88
O=C1CN2[C@@H]3CC(C[C@H]2CC1C3)OC(=O)C4=C[NH]C5=C4C=CC=C5	DOLASETRON MESYLATE	324.38	2.344	1	5		8.969	3.7	5.7
CC1(C)O[C@@H]2CO[C@@]3(CO[S](N)(=O)=O)OC(C)(C)O[C@H]3[C@@H]2O1	TOPIRAMATE	339.36	0.042	1	9		7.371	1.03	1.03
CC1=C(SC=C1)C(=CCCN2CCCC(C2)C(O)=O)C3=C(C)C=CS3	TIAGABINE HYDROCHLORIDE	375.55	2.775	1	3		10.814	1.88	3.88
OCCOCCN1CCN(CC1)C2=NC3=CC=CC=C3SC4=CC=CC=C24	QUETIAPINE FUMARATE	383.51	2.992	1	5		11.06	3.65	5.65
OC(=O)COCCN1CCN(CC1)C(C2=CC=CC=C2)C3=CC=C(Cl)C=C3	CETIRIZINE HYDROCHLORIDE	388.89	2.08	1	5		10.767	2.98	4.98
CN(C)CCOC1=CC=C(C=C1)\C(=C(\CCCl)C2=CC=CC=C2)C3=CC=CC=C3	TOREMIFENE CITRATE	405.97	6.531	0	2		12.561	8.86	11.86
COC1=CC=CC=C1OCCNCC(O)COC2=CC=CC3=C2C4=CC=CC=C4[NH]3	CARVEDILOL	406.48	4.041	3	6		11.769	4.24	8.24
CCOC1=CC=CC=C1OCCNC(C)CC2=CC(=C(OC)C=C2)[S](N)(=O)=O	TAMSULOSIN HYDROCHLORIDE	408.51	2.167	2	7		10.979	3.35	5.35
CCCCC1=NC2(CCCC2)C(=O)N1CC3=CC=C(C=C3)C4=CC=CC=C4C5=N[NH]N=N5	IRBESARTAN	428.54	6.054	1	7		12.314	4.85	7.85
NCC1OC(OC2C(N)CC(N)C(OC3OC(CO)C(O)C(N)C3O)C2O)C(N)CC1O	TOBRAMYCIN	467.52	-3.445	10	14		11.215	1.09	1.09
CC(C)(C(O)=O)C1=CC=C(C=C1)C(O)CCCN2CCC(CC2)C(O)(C3=CC=CC=C3)C4=CC=CC=C4	FEXOFENADINE HYDROCHLORIDE	501.67	1.957	3	5		14.891	3.11	6.11
CC1=C(C=CC=C1O)C(=O)NC(CSC2=CC=CC=C2)C(O)CN3C[C@H]4CCCC[C@H]4CC3C(=O)NC(C)(C)C	NELFINAVIR MESYLATE	567.79	5.842	4	7		16.411	4.33	6.33
NCC1OC(OC2C(O)C(OC2CO)OC3C(O)C(N)CC(N)C3OC4OC(CO)C(O)C(O)C4N)C(N)C(O)C1O	PAROMOMYCIN SULFATE	615.63	-6.523	13	19		14.122	1.58	1.58
NC(=O)NO	HYDROXYUREA	76.06	-1.8	3	4		1.567	-0.8	-0.8
NC(=O)C1=N[N](C=N1)C2OC(CO)C(O)C2O	RIBAVIRIN	244.21	-2.849	4	9		5.318	-0.8	0.2
OC(=O)C1CC[N]2C1=CC=C2C(=O)C3=CC=CC=C3	KETOROLAC TROMETHAMINE	255.27	1.622	1	4		6.995	1.19	3.19
CN(C)CCC1=C[NH]C2=C1C=C(C[N]3C=NC=N3)C=C2	RIZATRIPTAN BENZOATE	269.35	1.178	1	5		8.012	0.54	3.54
CN(C)CCOC(C1=CC=CC=C1)C2=CC=CC=C2C	ORPHENADRINE CITRATE	269.39	3.901	0	2		8.504	4.55	6.55
CC1=C(C=NO1)C(=O)NC2=CC=C(C=C2)C(F)(F)F	LEFLUNOMIDE	270.21	2.324	1	4		6.045	4.23	6.23
NC(=O)C[S](=O)C(C1=CC=CC=C1)C2=CC=CC=C2	MODAFINIL	273.35	0.937	1	3		7.835	2.68	4.68
OC(CC1=CN=CC=C1)([P](O)(O)=O)[P](O)(O)=O	RISEDRONATE SODIUM	283.11	-2.622	5	8		5.752	-0.68	0.32
FC(F)(F)[C@]1(OC(=O)NC2=C1C=C(Cl)C=C2)C#CC3CC3	EFAVIRENZ	315.68	3.726	1	3		7.053	7.09	8.09
CN(C)CCCC1(OCC2=C1C=CC(=C2)C#N)C3=CC=C(F)C=C3	CITALOPRAM HYDROBROMIDE	324.4	3.132	0	3		9.284	4.11	6.11
CC(C)N(CCC(C1=CC=CC=C1)C2=C(O)C=CC(=C2)C)C(C)C	TOLTERODINE TARTRATE	325.5	5.24	1	2		10.36	6.43	8.43
CN[S](=O)(=O)CCC1=CC2=C([NH]C=C2C3CCN(C)CC3)C=C1	NARATRIPTAN HYDROCHLORIDE	335.47	1.696	2	5		9.413	2.07	4.07
OC1=C2O[C@H]3C(=O)CC[C@@]4(O)[C@H]5CC(=C2[C@@]34CCN5CC6CC6)C=C1	NALTREXONE HYDROCHLORIDE	341.41	0.359	2	5		9.198	1.12	2.12
NC1=NC(=C2N=C[N](C3CC(COC(=O)CO)C=C3)C2=N1)NC4CC4	ABACAVIR SULFATE	344.38	1.062	3	9		9.014	1.81	3.81
CCCCCOC(=O)NC1=N[C](=O)[N](C=C1F)C2OC(C)C(O)C2O	CAPECITABINE	359.35	0.841	3	9		8.436	3.26	4.26
C[C@]12CC(O)[C@H]3[C@@H](CCC4=CC(=O)C=C[C@]34C)[C@@H]1CC[C@]2(O)C(=O)CO	PREDNISOLONE	360.45	1.423	3	5		9.84	2.22	2.22
CC1=CC=C(C=C1)C2=CC(=N[N]2C3=CC=C(C=C3)[S](N)(=O)=O)C(F)(F)F	CELECOXIB	381.37	4.372	1	5		9.145	5.65	8.65
COC1=C(OC)C=C2C(=NC(=NC2=C1)N3CCN(CC3)C(=O)C4CCCO4)N	TERAZOSIN HYDROCHLORIDE	387.44	2.182	1	9		10.303	2.71	4.71
CCCCC(=O)N(CC1=CC=C(C=C1)C2=CC=CC=C2C3=N[NH]N=N3)C(C(C)C)C(O)=O	VALSARTAN	435.53	4.869	2	8		12.202	2.65	5.65
OC1=CC=C(C=C1)C2=C(C(=O)C3=CC=C(OCCN4CCCCC4)C=C3)C5=C(S2)C=C(O)C=C5	RALOXIFENE HYDROCHLORIDE	473.59	6.861	2	5		13.605	5.92	9.92
CCCC1=N[N](C)C2=C1[NH]C(=N[C]2=O)C3=C(OCC)C=CC(=C3)[S](=O)(=O)N4CCN(C)CC4	SILDENAFIL CITRATE	474.58	2.218	1	10		12.585	3.78	6.78
CC(C)(O)C1=CC=CC=C1CCC(SCC2(CC2)CC(O)=O)C3=CC=CC(=C3)C=CC4=NC5=C(C=CC(=C5)Cl)C=C4	MONTELUKAST SODIUM	586.19	8.472	2	4		17.462	6.34	10.34
CCOC1=NC2=C([N]1CC3=CC=C(C=C3)C4=CC=CC=C4C5=NN=N[NH]5)C(=CC=C2)C(=O)OC(C)OC(=O)OC6CCCCC6	CANDESARTAN CILEXETIL	610.67	7.084	1	12		16.461	5.69	10.69
CCCCC1=C(C(=O)C2=CC(=C(OCCN(CC)CC)C(=C2)I)I)C3=CC=CC=C3O1	AMIODARONE HYDROCHLORIDE	645.32	8.945	0	4		14.374	9.41	12.41
CC(C)CC1N2C(=O)[C@](NC(=O)C3CN(C)[C@@H]4CC5=C(Br)[NH]C6=CC=CC(=C56)C4=C3)(O[C@@]2(O)[C@@H]7CCCN7C1=O)C(C)C	BROMOCRIPTINE MESYLATE	654.61	6.585	3	10		16.69	4.27	6.27
COC1C=CO[C@@]2(C)OC3=C(C2=O)C4=C(C(=C3C)O)C(=C(NC(=O)C(=CC=CC(C)C(O)C(C)C(O)C(C)C(OC(C)=O)C1C)C)C(=C4O)C=NN5CCN(CC5)C6CCCC6)O	RIFAPENTINE	877.04	5.092	6	16		23.686	3.71	5.71
CNC(C)C(O)C1=CC=CC=C1	PSEUDOEPHEDRINE HYDROCHLORIDE	165.24	0.888	2	2		5.066	0.11	1.11
C[N]1N=NC2=C(N=C[N]2[C]1=O)C(N)=O	TEMOZOLOMIDE	194.15	-0.811	1	8		4.507	-0.01	1.99
ClCCN(CCCl)[P]1(=O)NCCCO1	CYCLOPHOSPHAMIDE	261.08	0.803	1	4		5.911	1.48	1.48
ClC1=CC=CC=C1CN2CCC3=C(C2)C=CS3	TICLOPIDINE HYDROCHLORIDE	263.78	4.388	0	1		7.547	8.29	10.29
C[C@]12CC[C@H]3[C@@H](CC(=C)C4=CC(=O)C=C[C@]34C)[C@@H]1CCC2=O	EXEMESTANE	296.41	3.278	0	2		8.739	5.67	5.67
CCN(CC)C(=O)\C(=C\C1=CC(=C(O)C(=C1)O)[N](=O)=O)C#N	ENTACAPONE	305.29	1.761	2	8		8.014	2.18	3.18
CCN(C(C)=O)C1=CC=CC(=C1)C2=CC=NC3=C(C=N[N]23)C#N	ZALEPLON	305.34	1.435	0	6		8.632	3.34	6.34
CCOC(=O)C1=CC(OC(CC)CC)C(NC(C)=O)C(N)C1	OSELTAMIVIR PHOSPHATE	312.41	2.132	2	6		8.586	1.59	1.59
CC1=CC2=C(C=C1C(=C)C3=CC=C(C=C3)C(O)=O)C(C)(C)CCC2(C)C	BEXAROTENE	348.49	8.194	1	2		10.827	6.43	8.43
CCC1=CN=C(CCOC2=CC=C(CC3SC(=O)NC3=O)C=C2)C=C1	PIOGLITAZONE HYDROCHLORIDE	356.44	3.533	1	5		9.921	5.19	7.19
CN(CCOC1=CC=C(CC2SC(=O)NC2=O)C=C1)C3=CC=CC=N3	ROSIGLITAZONE MALEATE	357.43	3.02	1	6		9.826	3.82	5.82
COCCCOC1=C(C)C(=NC=C1)C[S](=O)C2=NC3=CC=CC=C3[NH]2	RABEPRAZOLE SODIUM	359.44	2.078	1	6		9.823	3.17	6.17
O=C1CCC2=C(N1)C=CC(=C2)OCCCCC3=NN=N[N]3C4CCCCC4	CILOSTAZOL	369.47	3.528	1	7		10.228	5.67	7.67
COC1=C2[N](C=C(C(O)=O)[C](=O)C2=CC(=C1N3C[C@@H]4CCCN[C@@H]4C3)F)C5CC5	MOXIFLOXACIN HYDROCHLORIDE	401.44	-0.082	2	7		10.547	1.54	3.54
CN(CCOC1=CC=C(N[S](C)(=O)=O)C=C1)CCC2=CC=C(N[S](C)(=O)=O)C=C2	DOFETILIDE	441.56	1.994	2	8		11.451	3.03	5.03
CC(=O)N1CCN(CC1)C2=CC=C(OCC3COC(C[N]4C=CN=C4)(O3)C5=CC=C(Cl)C=C5Cl)C=C2	KETOCONAZOLE	531.43	3.635	0	8		13.892	5.12	8.12
COC1C[C@@H](CCC1O)CC(C)[C@@H]2CC(=O)C(C)C=C(C)C(O)C(OC)C(=O)C(C)CC(C)C=CC=CC=C(C)C(C[C@@H]3CCC(C)[C@@](O)(O3)C(=O)C(=O)N4CCCC[C@H]4C(=O)O2)OC	SIROLIMUS	914.19	7.039	3	14		24.792	7.23	7.23
C[N]1C=C[NH][C]1=S	METHIMAZOLE	114.17	-0.34	1	2		3.44	0.08	1.08
NCCCCCC(O)=O	AMINOCAPROIC ACID	131.18	-2.235	2	3		3.518	-1.15	-1.15
CCC(N1CCCC1=O)C(N)=O	LEVETIRACETAM	170.21	-0.344	1	4		4.519	-0.28	-0.28
CC1O[C@@]2(CS1)CN3CCC2CC3	CEVIMELINE HYDROCHLORIDE	199.31	1.141	0	2		5.611	0.41	0.41
N[S](=O)(=O)CC1=NOC2=CC=CC=C12	ZONISAMIDE	212.22	-0.363	1	5		5.084	1.99	3.99
CCN(C)C(=O)OC1=CC=CC(=C1)C(C)N(C)C	RIVASTIGMINE TARTRATE	250.34	2.099	0	4		7.325	2.29	3.29
NC(=O)N1C2=CC=CC=C2CC(=O)C3=CC=CC=C13	OXCARBAZEPINE	252.27	1.206	1	4		7.223	3.36	5.36
CN1CC[C@]23CCCC[C@H]2C1CC4=C3C=C(O)C=C4	LEVORPHANOL TARTRATE	257.38	3.529	1	2		7.78	3.29	4.29
CC(C)NCC(O)C1=CC=C(N[S](C)(=O)=O)C=C1	SOTALOL HYDROCHLORIDE	272.36	0.226	3	5		7.234	-0.14	0.86
CCN(CC)C(=S)SSC(=S)N(CC)CC	DISULFIRAM	296.52	3.88	0	2		8.949	9.04	9.04
CC(C)[C@@H]1CC[C@H](CC1)C(O)=N[C@H](CC2=CC=CC=C2)C(O)=O	NATEGLINIDE	317.43	4.857	2	4		9.074	4.33	5.33
COCCCC\C(=N/OCCN)C1=CC=C(C=C1)C(F)(F)F	FLUVOXAMINE MALEATE	318.34	3.025	1	4		8.08	3.66	4.66
CC(=O)NCC1CN(C(=O)O1)C2=CC(=C(C=C2)N3CCOCC3)F	LINEZOLID	337.35	0.168	1	7		8.471	2.04	3.04
CCCNCC(O)COC1=CC=CC=C1C(=O)CCC2=CC=CC=C2	PROPAFENONE HYDROCHLORIDE	341.45	3.636	2	4		10.085	3.3	5.3
CC(C)NC(=O)N[S](=O)(=O)C1=C(NC2=CC=CC(=C2)C)C=CN=C1	TORSEMIDE	348.42	3.208	3	7		9.322	2.64	4.64
CN1C(=C(O)C2=C(C=CC=C2)[S]1(=O)=O)C(=O)NC3=NC=C(C)S3	MELOXICAM	351.4	2.292	2	7		8.561	1.38	3.38
OC(=O)CCNC(=O)C1=CC=C(C=C1)N=NC2=CC=C(O)C(=C2)C(O)=O	BALSALAZIDE DISODIUM	357.32	3.315	4	9		9.47	-0.15	1.85
COC1=C(OC)C(=NC=C1)C[S](=O)C2=NC3=C([NH]2)C=C(OC(F)F)C=C3	PANTOPRAZOLE SODIUM	383.37	2.111	1	7		9.08	2.87	5.87
CCOC1=C(C=CC(=C1)CC(=O)NC(CC(C)C)C2=CC=CC=C2N3CCCCC3)C(O)=O	REPAGLINIDE	452.6	5.303	2	6		13.094	5.1	7.1
FC1=CC=C(C=C1)C(CCCN2CCC(CC2)[N]3[C](=O)[NH]C4=CC=CC=C34)C5=CC=C(F)C=C5	PIMOZIDE	461.56	6.401	1	4		13.227	7.67	11.67
CCCC1=NC2=C(C=C(C=C2C)C3=NC4=CC=CC=C4[N]3C)[N]1CC5=CC=C(C=C5)C6=CC=CC=C6C(O)=O	TELMISARTAN	514.63	7.293	1	6		15.47	5.68	11.68
CCC(CO)NCCNC(CC)CO	ETHAMBUTOL HYDROCHLORIDE	204.31	0.119	4	4		5.859	-0.14	-0.14
CC(C)(C)NCC(O)C1=CC(=CC(=C1)O)O	TERBUTALINE SULFATE	225.29	0.482	4	4		6.299	-1.08	-0.08
COC1=CC2=C(C=C1)C=C(CCC(C)=O)C=C2	NABUMETONE	228.29	2.982	0	2		6.884	5.17	7.17
CNC1CCC2=C(C1)C3=C([NH]2)C=CC(=C3)C(N)=O	FROVATRIPTAN SUCCINATE	243.31	0.718	3	4		7.185	0.14	2.14
CC(C)C(=O)NC1=CC(=C(C=C1)[N](=O)=O)C(F)(F)F	FLUTAMIDE	276.21	3.335	1	5		6.07	5.24	6.24
COC1=C2O[C@H]3CC(O)C=C[C@]34CCN(C)CC(=C24)C=C1	GALANTAMINE HYDROBROMIDE	287.36	1.025	1	4		8.061	0.71	1.71
ClC1=CC2=C(C=C1)C(=C3CCNCC3)C4=C(CC2)C=CC=N4	DESLORATADINE	310.83	3.826	1	2		9.255	3.62	5.62
CN(C)CCC1=C[NH]C2=C1C=C(C[S](=O)(=O)N3CCCC3)C=C2	ALMOTRIPTAN MALATE	335.47	1.793	1	5		9.413	2.07	4.07
COC1=CC2=C([NH]C(=N2)[S@@](=O)CC3=NC=C(C)C(=C3C)OC)C=C1	ESOMEPRAZOLE MAGNESIUM	345.42	2.565	1	6		9.36	4.06	7.06
CC(C)C(N)C(=O)OCC(CO)OC[N]1C=NC2=C1[NH]C(=N[C]2=O)N	VALGANCICLOVIR HYDROCHLORIDE	354.37	-1.78	4	11		8.793	1.27	3.27
O=C1CC2(CCCC2)CC(=O)N1CCCCN3CCN(CC3)C4=NC=CC=N4	BUSPIRONE HYDROCHLORIDE	385.51	2.185	0	7		10.796	3.95	4.95
COC1=CC(=CC(=C1OC)OC)C(=O)NCC2=CC=C(OCCN(C)C)C=C2	TRIMETHOBENZAMIDE HYDROCHLORIDE	388.46	2.332	1	7		10.76	2.62	4.62
CCC(C)C(=O)OC1CC(C)C=C2C=CC(C)C(CCC3CC(O)CC(=O)O3)[C@@H]12	LOVASTATIN	404.55	4.082	1	5		11.256	7.81	7.81
ClC1=C(CCN2CCN(CC2)C3=NSC4=CC=CC=C34)C=C5CC(=O)NC5=C1	ZIPRASIDONE HYDROCHLORIDE	412.94	4.21	1	5		11.475	6.19	9.19
CCCC1OC2C[C@H]3[C@@H]4CCC5=CC(=O)C=C[C@]5(C)[C@H]4C(O)C[C@]3(C)[C@@]2(O1)C(=O)CO	BUDESONIDE	430.54	2.905	2	6		11.67	4.53	4.53
CN1CCN(CC1)CC2=CC=C(C=C2)C(=O)NC3=CC(=C(C)C=C3)NC4=NC=CC(=N4)C5=CN=CC=C5	IMATINIB MESYLATE	493.62	4.379	2	8		14.632	3.23	7.23
CC(C)OC(=O)OCO[P](=O)(CO[C@H](C)C[N]1C=NC2=C(N)N=CN=C12)OCOC(=O)OC(C)C	TENOFOVIR DISOPROXIL FUMARATE	519.45	0.801	1	15		11.969	3.96	5.96
COC1=CC=CC=C1OC2=C(N[S](=O)(=O)C3=CC=C(C=C3)C(C)(C)C)N=C(N=C2OCCO)C4=NC=CC=N4	BOSENTAN	551.62	4.167	2	11		14.478	3.85	7.85
COC1=CC(=CC(=C1O)OC)C2[C@@H]3[C@H](COC3=O)C(OC4O[C@@H]5COC(C)O[C@H]5C(O)C4O)C6=CC7=C(OCO7)C=C26	ETOPOSIDE	588.56	-0.112	3	13		14.07	3.13	5.13
OCCCC(O)=O	SODIUM OXYBATE	104.11	-0.581	2	3		2.374	-0.81	-0.81
CN(C)C(=N)NC(N)=N	METFORMIN HYDROCHLORIDE	129.17	-1.428	4	5		3.521	-0.22	-0.22
O[S](=O)(=O)CCS	MESNA	142.19	-1.554	1	3		2.937	-1.54	-1.54
CNCCC(OC1=CC=CC=C1C)C2=CC=CC=C2	ATOMOXETINE HYDROCHLORIDE	255.36	3.937	1	2		8.041	4.88	6.88
CN(C)CCC(C1=CC=C(Cl)C=C1)C2=CC=CC=N2	CHLORPHENIRAMINE MALEATE	274.79	3.148	0	2		8.168	3.56	5.56
CC(=O)OC1=CC=CC=C1C(=O)NC2=NC=C(S2)[N](=O)=O	NITAZOXANIDE	307.28	1.243	1	8		7.394	3.77	5.77
CCCCCN(C)CCC(O)([P](O)(O)=O)[P](O)(O)=O	IBANDRONATE SODIUM	319.23	-3.373	5	8		7.067	-0.35	-0.35
CN(C)CCC[C@]1(OCC2=C1C=CC(=C2)C#N)C3=CC=C(F)C=C3	ESCITALOPRAM OXALATE	324.4	3.132	0	3		9.284	4.11	6.11
CC1=NC=C2CN=C(C3=CC=CC=C3F)C4=C(C=CC(=C4)Cl)[N]12	MIDAZOLAM HYDROCHLORIDE	325.77	3.422	0	3		9.067	5.9	8.9
CC(C1=NC=NC=C1F)[C@](O)(C[N]2C=NC=N2)C3=C(F)C=C(F)C=C3	VORICONAZOLE	349.32	0.523	1	6		8.351	3.84	6.84
CC(C)OC(=O)C(C)(C)OC1=CC=C(C=C1)C(=O)C2=CC=C(Cl)C=C2	FENOFIBRATE	360.83	5.233	0	4		9.779	8.32	10.32
C[C@]12CC(O)[C@@]3(F)[C@@H](CCC4=CC(=O)CC[C@]34C)[C@@H]1CC[C@]2(O)C(=O)CO	FLUDROCORTISONE ACETATE	380.46	1.73	3	5		9.804	2.45	2.45
CN1CCCC1CC2=C[NH]C3=C2C=C(CC[S](=O)(=O)C4=CC=CC=C4)C=C3	ELETRIPTAN HYDROBROMIDE	382.52	3.355	1	4		11.092	5.71	8.71
OC(CCC1C(N(C1=O)C2=CC=C(F)C=C2)C3=CC=C(O)C=C3)C4=CC=C(F)C=C4	EZETIMIBE	409.43	3.958	2	4		11.058	5.79	8.79
COC(=O)C1CC2=CC(=O)CC[C@]2(C)[C@@]34OC3C[C@@]5(C)[C@@H](CC[C@@]56CCC(=O)O6)[C@H]14	EPLERENONE	414.5	0.475	0	6		10.861	4.6	4.6
CCCC1=NC(=C([N]1CC2=CC=C(C=C2)C3=C(C=CC=C3)C4=NN=N[NH]4)C(O)=O)C(C)(C)O	OLMESARTAN MEDOXOMIL	446.51	2.5	3	9		12.289	1.85	5.85
ClC1=CC=CC(=C1Cl)N2CCN(CCCCOC3=CC4=C(CCC(=O)N4)C=C3)CC2	ARIPIPRAZOLE	448.39	5.312	1	5		12.225	7.05	9.05
CC(C)(C)C(=O)OCO[P](=O)(COCC[N]1C=NC2=C(N)N=CN=C12)OCOC(=O)C(C)(C)C	ADEFOVIR DIPIVOXIL	501.48	1.398	1	13		12.126	4.7	6.7
CC12CC3CC(C)(C1)CC(N)(C3)C2	MEMANTINE HYDROCHLORIDE	179.31	3.033	1	1		5.58	1.9	1.9
COC1=CC=CC=C1OCC(O)CO	GUAIFENESIN	198.22	0.102	2	4		5.156	0.88	1.88
CCCNC1CCC2=C(C1)SC(=N2)N	PRAMIPEXOLE DIHYDROCHLORIDE	211.33	1.168	2	3		6.093	0.77	1.77
CCCCN1CC(O)C(O)C(O)C1CO	MIGLUSTAT	219.28	0.906	4	5		5.619	-0.47	-0.47
NC1=N[C](=O)[N](C=C1F)C2CSC(CO)O2	EMTRICITABINE	247.24	-1.291	2	6		5.654	-0.14	0.86
NC1=NC2=C(N=C[N]2COC(CO)CO)[C](=O)[NH]1	GANCICLOVIR	255.23	-2.145	4	9		6.069	-0.77	1.23
O=C1CCC(N2C(=O)C3=CC=CC=C3C2=O)C(=O)N1	THALIDOMIDE	258.23	0.528	1	6		6.461	0.66	1.66
CN1CCC(CC1)=C2C3=CC=CC=C3C=CC4=CC=CC=C24	CYPROHEPTADINE HYDROCHLORIDE	287.41	5.302	0	1		9.413	5.97	7.97
CN(C)CCOC(C1=CC=C(Cl)C=C1)C2=CC=CC=N2	CARBINOXAMINE MALEATE	290.79	2.668	0	3		8.321	4.39	6.39
CN[S](=O)(=O)CC1=CC2=C([NH]C=C2CCN(C)C)C=C1	SUMATRIPTAN SUCCINATE	295.4	0.743	2	5		8.199	1.06	3.06
CC1=C(\C=C\C(C)=C\C=C\C(C)=C/C(O)=O)C(C)(C)CCC1	ISOTRETINOIN	300.44	6.744	1	2		10.098	6.2	6.2
CC(C)NCC(O)COC1=CC=C(CCOCC2CC2)C=C1	BETAXOLOL HYDROCHLORIDE	307.43	2.319	2	4		8.945	2.77	3.77
CN1CCN(CC1)C2=NC3=CC=CC=C3NC4=C2C=C(C)S4	OLANZAPINE	312.44	2.859	1	4		9.198	4.08	6.08
CC[C@]12CC[C@H]3[C@@H](CCC4=CC(=O)CC[C@H]34)[C@@H]1CC[C@@]2(O)C#C	LEVONORGESTREL	312.45	3.319	1	2		9.244	5.44	5.44
CC(=O)C1CC[C@H]2[C@@H]3CCC4=CC(=O)CC[C@]4(C)[C@H]3CC[C@]12C	PROGESTERONE	314.47	3.965	0	2		9.33	7.45	7.45
OC(C1CCCCN1)C2=CC(=NC3=C2C=CC=C3C(F)(F)F)C(F)(F)F	MEFLOQUINE HYDROCHLORIDE	378.32	3.669	2	3		8.313	3.88	5.88
CO\N=C1/CN(CC1CN)C2=NC3=C(C=C2F)[C](=O)C(=C[N]3C4CC4)C(O)=O	GEMIFLOXACIN MESYLATE	389.39	-1.245	2	9		9.929	1.01	3.01
CN1CC(=O)N2[C@H](CC3=C([NH]C4=CC=CC=C34)C2C5=CC6=C(OCO6)C=C5)C1=O	TADALAFIL	389.41	2.584	1	7		10.611	3.89	6.89
FC(F)(F)COC1=CC(=C(OCC(F)(F)F)C=C1)C(=O)NCC2CCCCN2	FLECAINIDE ACETATE	414.35	3.66	2	5		8.785	3.46	4.46
CC(CCCC(C)(C)O)[C@H]1CC[C@H]2C(CCC[C@]12C)=CC=C3CC(O)CC(O)C3=C	CALCITRIOL	416.65	6.038	3	3		12.855	6.76	6.76
CCC1=N[N](CCCN2CCN(CC2)C3=CC(=CC=C3)Cl)[C](=O)[N]1CCOC4=CC=CC=C4	NEFAZODONE HYDROCHLORIDE	470.01	5.725	0	7		13.238	6.36	9.36
CC(C)C1=NC(=NC(=C1C=CC(O)CC(O)CC(O)=O)C2=CC=C(F)C=C2)N(C)[S](C)(=O)=O	ROSUVASTATIN CALCIUM	481.54	1.898	3	9		12.146	2.61	4.61
CCCC1=NC(=C2[N]1[NH]C(=N[C]2=O)C3=C(OCC)C=CC(=C3)[S](=O)(=O)N4CCN(CC)CC4)C	VARDENAFIL HYDROCHLORIDE	488.61	1.797	1	10		13.048	4.67	7.67
CC(OC1OCCN(CC2=N[NH][C](=O)[NH]2)C1C3=CC=C(F)C=C3)C4=CC(=CC(=C4)C(F)(F)F)C(F)(F)F	APREPITANT	534.43	4.596	2	7		11.712	5.57	8.57
CCC(=O)OC(O[P](=O)(CCCCC1=CC=CC=C1)CC(=O)N2CC(CC2C(O)=O)C3CCCCC3)C(C)C	FOSINOPRIL SODIUM	563.67	7.445	1	8		15.191	5.45	6.45
S=[C]1N=C[NH]C2=C1[NH]C=N2	MERCAPTOPURINE	152.18	-1.33	2	4		4.242	0.99	2.99
CC(C)CC(CN)CC(O)=O	PREGABALIN	159.23	-0.915	2	3		4.445	-0.61	-0.61
CCC1=NC=CC(=C1)C(N)=S	ETHIONAMIDE	166.24	1.729	1	2		5.13	2.3	3.3
CC[S](=O)(=O)CC[N]1C(=NC=C1[N](=O)=O)C	TINIDAZOLE	247.27	-0.319	0	7		5.71	0.65	1.65
CC1=CC=C(C=C1)C(=O)C2=CC(=C(O)C(=C2)O)[N](=O)=O	TOLCAPONE	273.24	3.245	2	6		7.081	3.19	5.19
CC(NCCCC1=CC(=CC=C1)C(F)(F)F)C2=CC=CC3=CC=CC=C23	CINACALCET HYDROCHLORIDE	357.42	6.352	1	1		10.086	5.49	8.49
COC(=O)C1=C(C)NC(=C(C1C2=CC=CC3=NON=C23)C(=O)OC(C)C)C	ISRADIPINE	371.39	3.916	1	8		9.868	4.68	6.68
COC1=C(OC)C=C2C(=NC(=NC2=C1)N(C)CCCNC(=O)C3CCCO3)N	ALFUZOSIN HYDROCHLORIDE	389.46	2.548	2	9		10.48	2.04	4.04
CC1=C(OC2=C(C=CC=C2C(=O)OCCN3CCCCC3)[C]1=O)C4=CC=CC=C4	FLAVOXATE HYDROCHLORIDE	391.47	4.97	0	5		11.229	7.53	10.53
NC(=O)C(C1CCN(CCC2=CC3=C(OCC3)C=C2)C1)(C4=CC=CC=C4)C5=CC=CC=C5	DARIFENACIN HYDROBROMIDE	426.56	3.621	1	4		12.92	4.52	7.52
NC1=NC(=CS1)\C(=N\OCC(O)=O)C(=O)NC2[C@H]3SCC(=C(N3C2=O)C(O)=O)C=C	CEFIXIME	453.44	0.252	4	12		10.844	0.17	1.17
COC1C=CO[C@@]2(C)OC3=C(C)C(=C4C(=C(NC(=O)C(=CC=CC(C)C(O)C(C)C(O)C(C)C(OC(C)=O)C1C)C)C5=C(N=C6C=C(C)C=C[N]56)C4=C3C2=O)O)O	RIFAXIMIN	785.89	7.186	5	14		21.075	5.16	9.16
CCC1OC(=O)C(C)C(=O)C(C)C(OC2OC(C)CC(C2O)N(C)C)[C@@](C)(CC(C)C(=O)C(C)[C@H]3N(CCCC[N]4C=NC(=C4)C5=CC=CN=C5)C(=O)O[C@]13C)OC	TELITHROMYCIN	812.02	3.746	1	15		21.707	4.06	6.06
CC(N)C12CC3CC(CC(C3)C1)C2	RIMANTADINE HYDROCHLORIDE	179.31	3.963	1	1		5.58	2.14	2.14
CC(=O)NCCC[S](O)(=O)=O	ACAMPROSATE CALCIUM	181.21	-2.465	2	5		3.926	-0.72	-0.72
CC(C)(C)NC[C@H](O)C1=CC(=C(O)C=C1)CO	LEVALBUTEROL TARTRATE	239.31	0.061	4	4		6.763	-1.02	-0.02
NC1=CC=CC2=C1CN(C3CCC(=O)NC3=O)C2=O	LENALIDOMIDE	259.26	-0.412	2	6		6.794	-0.09	0.91
CCC(=O)NCCC1CCC2=C1C3=C(OCC3)C=C2	RAMELTEON	259.35	2.485	1	3		7.529	5.54	6.54
CC1=C[N](C2CC(N=[N+]=[N-])C(CO)O2)[C](=O)[NH][C]1=O	ZIDOVUDINE	267.25	0.044	2	9		6.355	1.12	2.12
NC1=N[C](=O)C2=C([NH]1)[N](C=N2)C3CC(O)C(CO)C3=C	ENTECAVIR	277.28	-1.959	4	8		7.105	-0.32	1.68
O=C1CN(\N=C\C2=CC=C(O2)C3=CC=C(C=C3)[N](=O)=O)C(=O)N1	DANTROLENE SODIUM	314.26	1.631	1	9		8.007	3.39	5.39
COC1=CC=C2N=CC=C(C(O)[C@@H]3CC4CC[N@]3CC4C=C)C2=C1	QUININE SULFATE	324.42	2.785	1	4		9.562	2.4	4.4
ClC1=CC=CC=C1C([N]2C=CN=C2)(C3=CC=CC=C3)C4=CC=CC=C4	CLOTRIMAZOLE	344.84	5.004	0	2		10.396	6.95	10.95
O=C(OC1CN2CCC1CC2)N3CCC4=CC=CC=C4C3C5=CC=CC=C5	SOLIFENACIN SUCCINATE	362.47	4.68	0	4		10.696	6.19	8.19
OC(=O)C1=CC=C(C=C1)[N]2N=C(N=C2C3=CC=CC=C3O)C4=CC=CC=C4O	DEFERASIROX	373.37	3.668	3	7		10.188	0.7	4.7
CN1CCN(CC1)C(=O)OC2N(C(=O)C3=NC=CN=C23)C4=NC=C(Cl)C=C4	ESZOPICLONE	388.81	1.253	0	9		9.744	3.47	5.47
CC=CC1=C(N2[C@H](SC1)[C@H](NC(=O)C(N)C3=CC=C(O)C=C3)C2=O)C(O)=O	CEFPROZIL	389.43	-1.873	4	8		10.098	0.15	1.15
COCCOC1=C(OCCOC)C=C2C(=NC=NC2=C1)NC3=CC=CC(=C3)C#C	ERLOTINIB HYDROCHLORIDE	393.44	4.192	1	7		11.03	5.45	8.45
CC(C=CC(C)C(C)(C)O)[C@H]1CC[C@H]2C(CCC[C@]12C)=C[CH]=[C]3CC(O)[CH2]C(O)C3	PARICALCITOL	416.65	5.688	3	3		12.703	6.99	6.99
CCCCC1=NC=C(\C=C(/CC2=CC=CS2)C(O)=O)[N]1CC3=CC=C(C=C3)C(O)=O	EPROSARTAN MESYLATE	424.52	4.804	2	6		11.881	1.51	4.51
CCNC(=O)N(CCCN(C)C)C(=O)C1C[C@H]2[C@@H](CC3=C[NH]C4=CC=CC2=C34)N(CC=C)C1	CABERGOLINE	451.62	4.171	2	7		13.32	2.43	4.43
CNC(=O)C1=NC=CC(=C1)OC2=CC=C(NC(=O)NC3=CC(=C(Cl)C=C3)C(F)(F)F)C=C2	SORAFENIB	464.83	5.455	3	7		11.224	5.53	8.53
CN(C)C1[C@@H]2C[C@@H]3C(O)C4=C(C(=CC=C4Cl)O)C(=O)C3=C(O)[C@]2(O)C(=O)C(=C1O)C(N)=O	DEMECLOCYCLINE HYDROCHLORIDE	464.86	-0.576	6	10		11.316	1.9	2.9
CCC1=C(C)CN(C(O)=NCCC2=CC=C(C=C2)[S](=O)(=O)NC(O)=N[C@H]3CC[C@H](C)CC3)C1=O	GLIMEPIRIDE	490.62	4.774	3	9		13.067	4.18	5.18
CCC[C@@]1(CCC2=CC=CC=C2)CC(=C([C@H](CC)C3=CC(=CC=C3)N[S](=O)(=O)C4=NC=C(C=C4)C(F)(F)F)C(=O)O1)O	TIPRANAVIR	602.67	7.764	2	7		15.496	6.22	9.22
NC1CC1C2=CC=CC=C2	TRANYLCYPROMINE SULFATE	133.19	1.478	1	1		4.311	-0.02	0.98
C#CCNC1CCC2=CC=CC=C12	RASAGILINE MESYLATE	171.24	2.344	1	1		5.46	3.96	4.96
C[N]1C=NC2=C1[C](=O)[N](C)[C](=O)[N]2C	CAFFEINE CITRATE	194.19	-0.04	0	6		4.99	0.11	2.11
C1NC[C@@H]2C[C@H]1C3=CC4=NC=CN=C4C=C23	VARENICLINE TARTRATE	211.27	0.899	1	3		6.287	-0.32	1.68
CC1=C[N](C2CC(O)C(CO)O2)[C](=O)[NH][C]1=O	TELBIVUDINE	242.23	-1.385	3	7		5.757	-0.39	0.61
ONC(=O)CCCCCCC(=O)NC1=CC=CC=C1	VORINOSTAT	264.32	0.989	3	5		7.361	2	3
CN1CC[C@@]23[C@H]4OC5=C(O)C=CC(=C25)C[C@@H]1[C@]3(O)CCC4=O	OXYMORPHONE HYDROCHLORIDE	301.34	-0.484	2	5		7.944	0.5	1.5
C[C@]1(O)CC[C@H]2[C@@H]3CC[C@H]4CC(=O)OC[C@]4(C)[C@H]3CC[C@]12C	OXANDROLONE	306.45	2.963	1	3		8.622	5	5
COC1=C(Cl)C2=C(C(=O)[C@]3(O2)C(C)CC(=O)C=C3OC)C(=C1)OC	GRISEOFULVIN	352.77	2.053	0	6		8.661	5.49	6.49
CCCCC(F)(F)[C@@]1(O)CC[C@H]2[C@@H](CC(=O)C2CCCCCCC(O)=O)O1	LUBIPROSTONE	390.47	3.832	2	5		9.66	3.23	3.23
CCN(CC)CCNC(=O)C1=C(C)[NH]C(=C1C)\C=C2/C(=O)NC3=C2C=C(F)C=C3	SUNITINIB MALATE	398.48	2.998	3	6		11.337	2.28	4.28
NC(CC(=O)N1CC[N]2C(=NN=C2C(F)(F)F)C1)CC3=CC(=C(F)C=C3F)F	SITAGLIPTIN PHOSPHATE	407.32	0.691	1	6		8.606	2.43	4.43
CCC(C)C(=O)OC1CC(O)C=C2C=CC(C)C(CCC(O)CC(O)CC(O)=O)[C@@H]12	PRAVASTATIN SODIUM	424.53	2.048	4	7		11.276	1.53	1.53
CC1=C(CCN2CCC(CC2)C3=NOC4=C3C=CC(=C4)F)[C](=O)[N]5CCCC(O)C5=N1	PALIPERIDONE	426.49	1.874	1	7		11.43	2.47	5.47
COC1=CC=CC=C1OCC(O)CN2CCN(CC2)CC(=O)NC3=C(C)C=CC=C3C	RANOLAZINE	427.55	1.012	2	7		12.189	4.48	6.48
CC1=NC(=CC(=N1)N2CCN(CCO)CC2)NC3=NC=C(S3)C(=O)NC4=C(C)C=CC=C4Cl	DASATINIB	488.01	2.379	3	9		13.039	3.69	6.69
CC(C)C(N1CCCNC1=O)C(=O)NC(CC(O)C(CC2=CC=CC=C2)NC(=O)COC3=C(C)C=CC=C3C)CC4=CC=CC=C4	LOPINAVIR	628.81	6.095	4	9		18.234	5.89	8.89
CC[C@@H]([C@H](C)O)[N]1N=C[N]([C]1=O)C2=CC=C(C=C2)N3CCN(CC3)C4=CC=C(OC[C@@H]5CO[C@@](C5)(C[N]6C=NC=N6)C7=C(F)C=C(F)C=C7)C=C4	POSACONAZOLE	700.79	4.113	1	12		18.791	5.92	10.92
CC(O)C(O)[C@H]1CNC2=C(N1)[C](=O)[NH]C(=N2)N	SAPROPTERIN DIHYDROCHLORIDE	241.25	-1.175	6	8		6.033	-0.48	0.52
CC(CC1=CC=CC=C1)NC(=O)C(N)CCCCN	LISDEXAMFETAMINE DIMESYLATE	263.38	0.81	3	4		8.005	0.92	1.92
CC1=C(C=CC(C)=CC=CC(C)=CC(O)=O)C(C)(C)CCC1	TRETINOIN	300.44	6.744	1	2		10.098	6.2	6.2
CN1C2CCCC1CC(C2)NC(=O)C3=N[N](C)C4=C3C=CC=C4	GRANISETRON HYDROCHLORIDE	312.42	1.715	1	5		9.115	2.2	4.2
CC(=O)OCC(CC[N]1C=NC2=CN=C(N)N=C12)COC(C)=O	FAMCICLOVIR	321.34	0.085	1	9		8.093	1.84	3.84
COC(C(OC1=NC(=CC(=N1)C)C)C(O)=O)(C2=CC=CC=C2)C3=CC=CC=C3	AMBRISENTAN	378.43	3.751	1	6		10.567	3.64	6.64
NC1=NC(=CS1)\C(=N\O)C(=O)NC2[C@H]3SCC(=C(N3C2=O)C(O)=O)C=C	CEFDINIR	395.41	-0.482	4	10		9.728	0.21	1.21
COCCOC(=O)C1=C(C)NC(=C(C1C2=CC(=CC=C2)[N](=O)=O)C(=O)OC(C)C)C	NIMODIPINE	418.45	4.003	1	9		11.08	5.24	6.24
COCC1=C(N2[C@H](SC1)C(NC(=O)\C(=N/OC)C3=CSC(=N3)N)C2=O)C(O)=O	CEFPODOXIME PROXETIL	427.45	-0.03	3	11		10.522	0.11	1.11
C[N]1[C](=O)C(=C(N=C1C(C)(C)NC(=O)C2=NN=C(C)O2)C(=O)NCC3=CC=C(F)C=C3)O	RALTEGRAVIR POTASSIUM	444.42	1.16	3	11		10.981	2.71	5.71
CCCCCCCCCCCC(CC1OC(=O)C1CCCCCC)OC(=O)C(CC(C)C)NC=O	ORLISTAT	495.75	8.609	1	6		14.232	10.65	10.65
CC(C)C1=NN=C(C)[N]1C2C[C@@H]3CC[C@H](C2)N3CC[C@H](N=C(O)C4CCC(F)(F)CC4)C5=CC=CC=C5	MARAVIROC	513.68	3.861	1	6		14.159	3.4	5.4
CC1=C[N](C=N1)C2=CC(=CC(=C2)NC(=O)C3=CC(=C(C)C=C3)NC4=NC=CC(=N4)C5=CN=CC=C5)C(F)(F)F	NILOTINIB	529.53	5.694	2	8		13.993	4.76	9.76
COCCCOC1=C(OC)C=CC(=C1)CC(CC(N)C(O)CC(C(C)C)C(=O)NCC(C)(C)C(N)=O)C(C)C	ALISKIREN HEMIFUMARATE	551.77	3.514	4	9		15.61	3.06	4.06
C[S](=O)(=O)CCNCC1=CC=C(O1)C2=CC3=C(C=C2)N=CN=C3NC4=CC(=C(OCC5=CC(=CC=C5)F)C=C4)Cl	LAPATINIB DITOSYLATE	581.06	5.815	2	8		15.291	6.02	11.02
C[C@H]1O[C@H](O[C@H]2[C@H](O)[C@@H](O)[C@H](O[C@@H]2CO)O[C@H]([C@H](O)CO)[C@H](O)[C@@H](O)C=O)[C@H](O)[C@@H](O)[C@@H]1N[C@H]3C=C(CO)[C@@H](O)[C@H](O)[C@H]3O	ACARBOSE	645.61	-6.681	14	19		14.222	0.85	0.85
N[C@@H](CCC(N)=O)C(O)=O	GLUTAMINE	146.15	-3.375	3	5		3.458	-0.11	-0.11
CC(O)([P](O)(O)=O)[P](O)(O)=O	ETIDRONATE DISODIUM	206.03	-2.543	5	7		3.452	-1.41	-1.41
NC(=O)C1=C[N](CC2=C(F)C=CC=C2F)N=N1	RUFINAMIDE	238.2	0.514	1	5		5.57	3.01	5.01
CNCCCC1C2=CC=CC=C2C=CC3=CC=CC=C13	PROTRIPTYLINE HYDROCHLORIDE	263.38	4.865	1	1		8.612	4.01	6.01
CN(C)CC(C1=CC=C(O)C=C1)C2(O)CCCCC2	DESVENLAFAXINE SUCCINATE	263.38	2.683	2	3		7.824	2.19	3.19
COC1=C2O[C@H]3C(O)CC[C@H]4[C@H]5CC(=C2[C@@]34CCN5C)C=C1	DIHYDROCODEINE BITARTRATE	301.39	1.261	1	4		8.373	1.16	2.16
COC1=C(OC)C=C2C3CC(=O)C(CC(C)C)CN3CCC2=C1	TETRABENAZINE	317.43	3.465	0	4		9.074	6.05	7.05
CC(C)(OC1=CC=C(C=C1)C(=O)C2=CC=C(Cl)C=C2)C(O)=O	FENOFIBRIC ACID	318.75	4.065	1	4		8.388	3.18	5.18
C[N@@+]1(CC[C@@]23C4OC5=C(O)C=CC(=C25)CC1[C@]3(O)CCC4=O)CC6CC6	METHYLNALTREXONE BROMIDE	356.44	-2.639	2	5		9.751	2.27	3.27
OC(CNCC(O)C1CCC2=C(O1)C=CC(=C2)F)C3CCC4=C(O3)C=CC(=C4)F	NEBIVOLOL HYDROCHLORIDE	405.44	3.5	3	5		10.495	3.62	5.62
CCOC1=CC=C(CC2=C(Cl)C=CC(=C2)C3OC(CO)C(O)C(O)C3O)C=C1	DAPAGLIFLOZIN PROPANEDIOL	408.88	3.369	4	6		10.607	3.74	5.74
CC(C)N(CCC(C1=CC=CC=C1)C2=C(OC(=O)C(C)C)C=CC(=C2)CO)C(C)C	FESOTERODINE FUMARATE	411.59	4.357	1	4		12.404	5.75	7.75
CC[C@@]1(O)C(=O)OCC2=C1C=C3[N](CC4=CC5=C(C=CC(=C5CN(C)C)O)N=C34)[C]2=O	TOPOTECAN HYDROCHLORIDE	421.45	0.71	2	8		11.435	0.92	3.92
CC1=CC(=CC(=C1OC2=C(Br)C(=NC(=N2)NC3=CC=C(C=C3)C#N)N)C)C#N	ETRAVIRINE	435.29	5.074	2	7		10.839	5.76	8.76
CC1=CC=C(C=C1C)N2N=C(C)\C(=N\NC3=C(O)C(=CC=C3)C4=CC=CC(=C4)C(O)=O)C2=O	ELTROMBOPAG OLAMINE	442.48	5.249	3	8		12.886	2.99	5.99
CC(C)CN(CC(O)C(CC1=CC=CC=C1)NC(=O)OC2CO[C@H]3OCC[C@@H]23)[S](=O)(=O)C4=CC=C(N)C=C4	DARUNAVIR ETHANOLATE	547.67	2.887	3	10		14.429	4.75	6.75
NC(CCC(O)=O)C=C	VIGABATRIN	129.16	-2.217	2	3		3.492	-1.18	-1.18
CCC(C(C)CN(C)C)C1=CC(=CC=C1)O	TAPENTADOL HYDROCHLORIDE	221.34	3.154	1	2		6.921	3.21	4.21
CCN(CC)C(=O)[C@@]1(CC1CN)C2=CC=CC=C2	MILNACIPRAN HYDROCHLORIDE	246.35	1.906	1	3		7.498	1.19	2.19
COCC(NC(C)=O)C(=O)NCC1=CC=CC=C1	LACOSAMIDE	250.3	0.392	2	5		6.897	1.39	2.39
NC(=O)C[S@@](=O)C(C1=CC=CC=C1)C2=CC=CC=C2	ARMODAFINIL	273.35	0.937	1	3		7.835	2.68	4.68
C[N]1C2=C(C(=O)N(CC2)CC3=C(C)[NH]C=N3)C4=CC=CC=C14	ALOSETRON HYDROCHLORIDE	294.36	1.737	1	5		8.545	2.31	5.31
COC1O[C@@H]2O[C@@]3(C)CC[C@H]4C(C)CC[C@@H](C1C)[C@@]24OO3	ARTEMETHER	298.38	3.055	0	5		7.781	4.17	4.17
NC(C(=O)N1C(CC2CC12)C#N)C34CC5CC(CC(O)(C5)C3)C4	SAXAGLIPTIN HYDROCHLORIDE	315.42	0.011	2	5		8.619	1.16	1.16
CC(C)COC1=C(C=C(C=C1)C2=NC(=C(S2)C(O)=O)C)C#N	FEBUXOSTAT	316.38	4.097	1	5		8.4	2.45	4.45
ClC(Cl)C(C1=CC=C(Cl)C=C1)C2=CC=CC=C2Cl	MITOTANE	320.03	6.06	0	0		8.093	8.35	10.35
CCC(=O)O[C@@](CC1=CC=CC=C1)([C@H](C)CN(C)C)C2=CC=CC=C2	PROPOXYPHENE NAPSYLATE	339.48	5.21	0	3		10.395	6.79	8.79
CC1=C(OCC(F)(F)F)C=CN=C1C[S@@](=O)C2=NC3=CC=CC=C3[NH]2	DEXLANSOPRAZOLE	369.36	2.598	1	5		8.789	4.69	7.69
CC(=O)OC1=CC2=C(CCN(C2)C(C(=O)C3CC3)C4=CC=CC=C4F)S1	PRASUGREL HYDROCHLORIDE	373.44	3.431	0	4		9.941	6.63	8.63
CCCCCC(O)CCC1C(O)C[C@@H]2CC3=C(C[C@H]12)C=CC=C3OCC(O)=O	TREPROSTINIL	390.52	3.723	3	5		10.866	3.57	4.57
C[C@H](CCC(O)=O)[C@H]1CC[C@H]2[C@@H]3[C@H](O)C[C@@H]4C[C@H](O)CC[C@]4(C)[C@H]3CC[C@]12C	CHENODIOL	392.58	4.514	3	4		11.094	2.91	2.91
COC1=CC=C2C(=C[C]1=O)C(CCC3=C2C(=C(OC)C(=C3)OC)OC)NC(C)=O	COLCHICINE	399.44	1.195	1	7		10.859	2.75	4.75
CC(C)[C@@H](C)\C=C\[C@@H](C)[C@H]1CC[C@H]2\C(CCC[C@]12C)=C\C=C3/C[C@@H](O)C[C@H](O)C3=C	DOXERCALCIFEROL	412.66	8.16	2	2		13.14	9.39	9.39
COC1=C(OCCCN2CCC(CC2)C3=NOC4=C3C=CC(=C4)F)C=CC(=C1)C(C)=O	ILOPERIDONE	426.49	3.916	0	6		11.541	5.97	8.97
C[N]1N=C2C=C(C=CC2=C1C)N(C)C3=CC=NC(=N3)NC4=CC=C(C)C(=C4)[S](N)(=O)=O	PAZOPANIB HYDROCHLORIDE	437.52	3.504	2	9		12.029	3.77	7.77
CC1=CC=CC=C1C(=O)NC2=CC(=C(C=C2)C(=O)N3CCCC(O)C4=C3C=CC(=C4)Cl)C	TOLVAPTAN	448.95	4.31	2	5		12.697	5.64	8.64
CO[C@]12CC[C@@]3(CC1[C@](C)(O)C(C)(C)C)C4CC5=C6C(=C(O)C=C5)OC2[C@@]36CCN4CC7CC7	BUPRENORPHINE HYDROCHLORIDE	467.65	3.989	2	5		13.313	4.18	5.18
CC(CC1=CC2=C(N(CCCO)CC2)C(=C1)C(N)=O)NCCOC3=CC=CC=C3OCC(F)(F)F	SILODOSIN	495.54	2.968	3	7		12.699	3.6	5.6
CCCCN(CCCC)CCCOC1=CC=C(C=C1)C(=O)C2=C(CCCC)OC3=C2C=C(N[S](C)(=O)=O)C=C3	DRONEDARONE	556.76	8.567	1	7		15.785	7	10
CC(C)CN(CC(O[P](O)(O)=O)C(CC1=CC=CC=C1)NC(=O)OC2CCOC2)[S](=O)(=O)C3=CC=C(N)C=C3	FOSAMPRENAVIR CALCIUM	585.61	2.501	4	12		14.622	1.02	3.02
COC1C[C@@H](CCC1OCCO)CC(C)[C@@H]2CC(=O)C(C)C=C(C)C(O)C(OC)C(=O)C(C)CC(C)C=CC=CC=C(C)C(C[C@@H]3CCC(C)[C@@](O)(O3)C(=O)C(=O)N4CCCC[C@H]4C(=O)O2)OC	EVEROLIMUS	958.24	7.103	3	15		25.873	7.52	7.52
N=[C]1C=C[NH]C=C1	DALFAMPRIDINE	94.12	-1.639	2	2		2.846	0.57	1.57
NCC1CCC(CC1)C(O)=O	TRANEXAMIC ACID	157.21	-1.801	2	3		4.268	-0.17	-0.17
NC(=O)NC(CCC(O)=O)C(O)=O	CARGLUMIC ACID	190.16	-1.935	4	7		4.111	-1.23	-1.23
CC(CC1=CC=CC=C1)N(C)CC2=CC=CC=C2	BENZPHETAMINE HYDROCHLORIDE	239.36	4.382	0	1		7.887	7.21	9.21
CN(C)CCC1=C[NH]C2=CC=C(CC3COC(=O)N3)C=C12	ZOLMITRIPTAN	287.36	1.288	2	5		8.265	1.95	3.95
CCCCCCCCC1=CC=C(CCC(N)(CO)CO)C=C1	FINGOLIMOD HYDROCHLORIDE	307.48	5.058	3	3		9.393	3.45	4.45
CC1=CC=C(C=C1)[S](=O)(=O)NC(=O)NN2CCCCCC2	TOLAZAMIDE	311.4	1.338	2	6		8.236	2.63	3.63
CN(C)CCC(C1=CC=C(Br)C=C1)C2=CC=CC=N2	BROMPHENIRAMINE MALEATE	319.25	3.298	0	2		8.453	4.15	6.15
CCOC(=O)C1=CN=C(C=C1)C#CC2=CC3=C(SCCC3(C)C)C=C2	TAZAROTENE	351.46	6.075	0	3		10.546	6.85	8.85
CCCCCCC(C)(C)C1=CC(=C2[C@@H]3CC(=O)CC[C@H]3C(C)(C)OC2=C1)O	NABILONE	372.55	6.72	1	3		11.024	8.05	9.05
OC(C(=O)OC1C[C@@H]2CC[C@H](C1)[N+]23CCCC3)(C4=CC=CC=C4)C5=CC=CC=C5	TROSPIUM CHLORIDE	392.52	-1.155	1	4		11.496	4.99	6.99
OC(CC(O)C=CC1=C(C2=CC=C(F)C=C2)C3=CC=CC=C3N=C1C4CC4)CC(O)=O	PITAVASTATIN CALCIUM	421.47	3.589	3	5		11.738	2.43	5.43
CN(C)C1=CC=C(C=C1)C2C[C@@]3(C)C(CC[C@]3(O)C(C)=O)C4CCC5=CC(=O)CCC5=C24	ULIPRISTAL ACETATE	433.59	3.97	1	4		12.573	6.22	7.22
CC(C)NC1=C(N=CC=C1)N2CCN(CC2)C(=O)C3=CC4=C([NH]3)C=CC(=C4)N[S](C)(=O)=O	DELAVIRDINE MESYLATE	456.57	2.412	3	9		12.486	3.24	6.24
O=C1C2C3CCC(C3)C2C(=O)N1CC4CCCCC4CN5CCN(CC5)C6=NSC7=CC=CC=C67	LURASIDONE HYDROCHLORIDE	492.68	5.614	0	6		14.005	7.1	9.1
CO\N=C(/C(=O)NC1[C@H]2SCC(=C(N2C1=O)C(O)=O)C=CC3=C(C)N=CS3)C4=CSC(=N4)N	CEFDITOREN PIVOXIL	506.57	1.465	3	11		12.993	0.44	2.44
C[C@]12CC[C@H]3[C@@H](CC[C@H]4NC(=O)C=C[C@]34C)[C@@H]1CC[C@@H]2C(=O)NC5=CC(=CC=C5C(F)(F)F)C(F)(F)F	DUTASTERIDE	528.54	4.94	2	4		12.671	8.29	9.29
CCCCCCOC(=O)N=C(N)C1=CC=C(NCC2=NC3=C(C=CC(=C3)C(=O)N(CCC(=O)OCC)C4=CC=CC=N4)[N]2C)C=C1	DABIGATRAN ETEXILATE MESYLATE	627.75	4.129	2	12		17.842	6.46	10.46
CC(C)C(NC(=O)N(C)CC1=CSC(=N1)C(C)C)C(=O)NC(CC(O)C(CC2=CC=CC=C2)NC(=O)OCC3=CN=CS3)CC4=CC=CC=C4	RITONAVIR	720.95	4.937	4	11		20.118	5.41	9.41
C[N]1C=C[C](=O)C(=C1C)O	DEFERIPRONE	139.15	-0.903	1	3		3.771	-0.62	0.38
COC1=CC(=C2N=CC=CC2=C1)NC(C)CCCN	PRIMAQUINE PHOSPHATE	259.35	2.598	2	4		7.839	0.99	2.99
NC(CC1=CC=C(C=C1)N(CCCl)CCCl)C(O)=O	MELPHALAN	305.2	-0.207	2	4		7.844	0.94	1.94
N#CCC(C1CCCC1)[N]2C=C(C=N2)C3=C4C=C[NH]C4=NC=N3	RUXOLITINIB	306.37	2.215	1	6		8.66	3.98	6.98
O=C1CN(CC2N1CCC3=CC=CC=C23)C(=O)C4CCCCC4	PRAZIQUANTEL	312.41	3.36	0	4		8.995	5.25	6.25
C[C@]12CCC(O)CC1=CC[C@@H]3[C@@H]2CC[C@@]4(C)[C@H]3CC=C4C5=CC=CN=C5	ABIRATERONE ACETATE	349.52	5.165	1	2		10.682	5.57	6.57
CC1=C(NC2=NC(=NC=C2)NC3=CC=C(C=C3)C#N)C(=CC(=C1)\C=C\C#N)C	RILPIVIRINE HYDROCHLORIDE	366.43	5.452	2	6		11.115	6.43	9.43
FC(F)OC1=C(OCC2CC2)C=C(C=C1)C(=O)NC3=C(Cl)C=NC=C3Cl	ROFLUMILAST	403.21	3.003	1	5		9.359	7.11	9.11
ClC1=CC=C(S1)C(=O)NC[C@H]2CN(C(=O)O2)C3=CC=C(C=C3)N4CCOCC4=O	RIVAROXABAN	435.88	2.394	1	8		10.839	4.02	6.02
NC(=O)C1=CC2=C(O1)C=CC(=C2)N3CCN(CCCCC4=C[NH]C5=C4C=C(C=C5)C#N)CC3	VILAZODONE HYDROCHLORIDE	441.54	4.077	2	7		12.835	4.26	8.26
C[C@@H](OC1=CC(=CN=C1N)C2=C[N](N=C2)C3CCNCC3)C4=C(Cl)C=CC(=C4Cl)F	CRIZOTINIB	450.34	4.288	2	6		11.676	3.25	6.25
CCOC1=NC2=CC=CC(=C2[N]1CC3=CC=C(C=C3)C4=CC=CC=C4C5=NO[C](=O)[NH]5)C(O)=O	AZILSARTAN KAMEDOXOMIL	456.46	4.925	2	9		12.331	2.26	7.26
CC#CC[N]1C(=NC2=C1[C](=O)[N](CC3=NC4=CC=CC=C4C(=N3)C)[C](=O)[N]2C)N5CCC[C@@H](N)C5	LINAGLIPTIN	472.55	1.909	1	10		13.375	2.91	6.91
COC1=C(OCC2CCN(C)CC2)C=C3N=CN=C(NC4=C(F)C=C(Br)C=C4)C3=C1	VANDETANIB	475.36	5.686	1	6		11.835	5.46	8.46
CCC[S](=O)(=O)NC1=C(F)C(=C(F)C=C1)C(=O)C2=C[NH]C3=NC=C(C=C23)C4=CC=C(Cl)C=C4	VEMURAFENIB	489.92	4.169	2	6		12.272	5.57	9.57
CCCSC1=NC2=C(N=N[N]2C3CC(OCCO)C(O)C3O)C(=N1)NC4CC4C5=CC(=C(F)C=C5)F	TICAGRELOR	522.57	3.346	4	10		13.006	2.69	5.69
CCC1C=C(C)C(O)CC=CC=C(COC2OC(C)C(OC(=O)C3=C(CC)C(=C(O)C(=C3O)Cl)Cl)C(O)C2OC)C(=O)OC(CC=C(C)C=C(C)C1OC4OC(C)(C)C(OC(=O)C(C)C)C(O)C4O)C(C)O	FIDAXOMICIN	1058.05	7.192	7	18		26.599
CC1CNCCC2=CC=C(Cl)C=C12	LORCASERIN HYDROCHLORIDE HEMIHYDRATE	195.69	3.236	1	1		5.69	2.38	3.38
NC(CC1=CC(=C(O)C=C1)O)C(O)=O	LEVODOPA	197.19	-2.82	4	5		4.944	-1.03	-0.03
CC(C(O)=O)C1=CC(=CC=C1)OC2=CC=CC=C2	FENOPROFEN CALCIUM	242.27	3.821	1	3		6.933	1.64	3.64
CC1=C2NC(=O)C3=C(N=CC=C3)N(C4CC4)C2=NC=C1	NEVIRAPINE HEMIHYDRATE	266.3	2.65	1	5		7.555	3.78	5.78
CN1C(=O)CC(=O)N(C2=CC=CC=C2)C3=C1C=CC(=C3)Cl	CLOBAZAM	300.74	2.438	0	4		8.178	3.52	5.52
CCOC(=O)NC1=C(N)C=C(NCC2=CC=C(F)C=C2)C=C1	EZOGABINE	303.34	2.003	3	5		8.365	3.92	5.92
N[S](=O)(=O)C1=CC(=C(Cl)C(=C1)[S](N)(=O)=O)Cl	DICHLORPHENAMIDE	305.14	0.241	2	6		6.154	2.43	3.43
C[C@@H]1CCN(C[C@@H]1N(C)C2=NC=NC3=C2C=C[NH]3)C(=O)CC#N	TOFACITINIB CITRATE	312.38	1.551	1	7		8.632	2.36	4.36
CCOC(=O)CCC\C=C/C/C=C\C\C=C/C/C=C\C\C=C/CC	ICOSAPENT ETHYL	330.51	7.813	0	2		10.443	9.52	9.52
CC1=CC=C(C=C1)\C(=C/CN2CCCC2)C3=CC=CC(=N3)\C=C\C(O)=O	ACRIVASTINE	348.45	1.461	1	4		10.648	2.07	4.07
O=[C]1[N](C=C(C=C1C2=CC=CC=C2C#N)C3=NC=CC=C3)C4=CC=CC=C4	PERAMPANEL	349.39	4.169	0	4		10.491	4.17	8.17
CN=C(O)C1=CC=CC=C1SC2=CC3=N[NH]C(=C3C=C2)\C=C\C4=CC=CC=N4	AXITINIB	386.47	4.465	2	5		11.691	6.13	10.13
CC(C)(C)C1=C(O)C=C(NC(=O)C2=C[NH]C3=CC=CC=C3[C]2=O)C(=C1)C(C)(C)C	IVACAFTOR	392.5	3.823	3	5		11.622	5.37	8.37
NC1=NC(=CS1)CC(=O)NC2=CC=C(CCNCC(O)C3=CC=CC=C3)C=C2	MIRABEGRON	396.51	1.32	4	6		11.387	2.43	5.43
C[S](=O)(=O)C1=CC(=C(C=C1)C(=O)NC2=CC=C(Cl)C(=C2)C3=CC=CC=N3)Cl	VISMODEGIB	421.29	2.744	1	5		10.687	5.23	8.23
CC1CN(CC[C@@]1(C)C2=CC(=CC=C2)O)CC(CC3=CC=CC=C3)C(=O)NCC(O)=O	ALVIMOPAN	424.54	2.164	3	6		12.167	1.54	3.54
CC#C[C@]1(O)CC[C@H]2[C@@H]3CCC4=CC(=O)CCC4=C3C(C[C@]12C)C5=CC=C(C=C5)N(C)C	MIFEPRISTONE	429.6	4.468	1	3		12.874	8.3	9.3
O[S](=O)(=O)OC1=CC=C(C=C1)C(C2=CC=C(O[S](O)(=O)=O)C=C2)C3=CC=CC=N3	SODIUM PICOSULFATE	437.44	-0.304	2	9		10.321	0.59	3.59
COC1=CC2=C(C=C1CC3=C(F)C(=CC=C3)Cl)[C](=O)C(=C[N]2[C@H](CO)C(C)C)C(O)=O	ELVITEGRAVIR	447.89	4.559	2	6		11.602	5.17	8.17
COC1=CC=C(C=C1)[N]2N=C(C(N)=O)C3=C2C(=O)N(CC3)C4=CC=C(C=C4)N5CCCCC5=O	APIXABAN	459.51	1.892	1	9		12.579	4.31	7.31
CNC(=O)C1=C(F)C=C(C=C1)N2C(=S)N(C(=O)C2(C)C)C3=CC=C(C#N)C(=C3)C(F)(F)F	ENZALUTAMIDE	464.44	3.354	1	6		11.342	5.73	7.73
CNC(=O)C1=CC(=CC=N1)OC2=CC(=C(NC(=O)NC3=CC=C(Cl)C(=C3)C(F)(F)F)C=C2)F	REGORAFENIB MONOHYDRATE	482.82	5.185	3	7		11.239	5.38	8.38
COC1=CC2=C(C=C1OC)C(=CC=N2)OC3=CC=C(NC(=O)C4(CC4)C(=O)NC5=CC=C(F)C=C5)C=C3	CABOZANTINIB S-MALATE	501.51	4.943	2	8		13.581	5.42	9.42
COC1=CC(=C(Cl)C=C1Cl)NC2=C(C=NC3=CC(=C(OC)C=C23)OCCCN4CCN(C)CC4)C#N	BOSUTINIB MONOHYDRATE	530.45	4.937	1	8		14.163	6.42	9.42
CN1CCN(CC1)CC2=CC=C(NC(=O)C3=CC(=C(C)C=C3)C#CC4=CN=C5C=CC=N[N]45)C=C2C(F)(F)F	PONATINIB HYDROCHLORIDE	532.57	5.768	1	7		14.62	6.21	10.21
COC1=NC2=C(C=C(Br)C=C2)C=C1C(C3=CC=CC=C3)[C@@](O)(CCN(C)C)C4=CC=CC5=C4C=CC=C5	BEDAQUILINE FUMARATE	555.52	7.251	1	4		15.574	5.99	10.99
CNC(CC(C)C)C(=O)NC1C(O)C2=CC=C(OC3=C(OC4OC(CO)C(O)C(O)C4OC5C[C@](C)(N)C(O)C(C)O5)C6=CC(=C3)C(NC(=O)C(CC(N)=O)NC1=O)C(=O)NC7C(=O)NC(C(O)C8=CC(=C(O6)C=C8)Cl)C(=O)NC(C(O)=O)C9=CC(=CC(=C9C%10=C(O)C=CC7=C%10)O)O)C(=C2)Cl	VANCOMYCIN HYDROCHLORIDE	1449.27	-1.142	19	33		35.653
CC(O)[C@@H]1NC(=O)C2CSSCC3NC(=O)C(N)CSSCC(NC(=O)[C@H](CSSC[C@H](NC(=O)CNC1=O)C(=O)NC(CC4=CC=C(O)C=C4)C(O)=O)NC(=O)C(CC5=CC=C(O)C=C5)NC(=O)C(CCC(O)=O)NC3=O)C(=O)NC(CC(N)=O)C(=O)N6CCCC6C(=O)NC(C)C(=O)N2	LINACLOTIDE	1526.73	-3.12	19	36		37.994
COC(=O)\C=C\C(=O)OC	DIMETHYL FUMARATE	144.13	0.784	0	4		3.464	2.06	2.06
NC1=N[C](=S)C2=C([NH]C=N2)[NH]1	THIOGUANINE	167.19	-1.882	3	5		4.611	1.12	3.12
CNC1(C)C2CCC(C2)C1(C)C	MECAMYLAMINE HYDROCHLORIDE	167.3	2.825	1	1		5.293	2.38	2.38
OC(=O)C(S)C(S)C(O)=O	SUCCIMER	182.21	-1.476	2	4		4.023	-0.9	-0.9
CCN(CC)CC(=O)NC1=C(C)C=CC=C1C	LIDOCAINE HYDROCHLORIDE	234.34	1.954	1	3		7.172	4.8	5.8
CCN(CC)C(=O)[C@]1(CC1CN)C2=CC=CC=C2	LEVOMILNACIPRAN HYDROCHLORIDE	246.35	1.906	1	3		7.498	1.19	2.19
C\C(O)=C(/C#N)C(=O)NC1=CC=C(C=C1)C(F)(F)F	TERIFLUNOMIDE	270.21	2.132	2	4		6.14	3.12	4.12
NC1=CC=CC2=C1C(=O)N(C3CCC(=O)NC3=O)C2=O	POMALIDOMIDE	273.25	-0.189	2	7		6.829	-0.19	0.81
CC1=CC=C(C=C1)\C(=C/CN2CCCC2)C3=CC=CC=N3	TRIPROLIDINE HYDROCHLORIDE	278.4	3.634	0	2		8.941	4.16	6.16
CC1=CC(=C(SC2=CC=CC=C2N3CCNCC3)C=C1)C	VORTIOXETINE HYDROBROMIDE	298.45	4.92	1	2		9.349	4.99	6.99
C[N]1[C](=O)C=C(N2CCCC(N)C2)[N](CC3=C(C=CC=C3)C#N)[C]1=O	ALOGLIPTIN BENZOATE	339.4	0.989	1	7		9.488	1.7	3.7
OCCOC1=CC=C(C=C1)\C(=C(\CCCl)C2=CC=CC=C2)C3=CC=CC=C3	OSPEMIFENE	378.9	5.559	1	2		11.418	7.52	10.52
CC1CCO[C@H]2C[N]3C=C(C(=O)NCC4=CC=C(F)C=C4F)[C](=O)C(=C3C(=O)N12)O	DOLUTEGRAVIR SODIUM	419.38	-0.407	2	8		10.167	2.43	4.43
COC(=O)N(C)C1=C(N)N=C(N=C1N)C2=N[N](CC3=C(F)C=CC=C3)C4=C2C=CC=N4	RIOCIGUAT	422.42	1.844	2	10		11.15	3.09	7.09
NC1=NC=NC2=C1C(=N[N]2C3CCCN(C3)C(=O)C=C)C4=CC=C(OC5=CC=CC=C5)C=C4	IBRUTINIB	440.51	4.069	1	8		12.705	4.92	8.92
CC1=CC=C(C=C1CC2=CC=C(S2)C3=CC=C(F)C=C3)[C@@H]4OC(CO)C(O)C(O)C4O	CANAGLIFLOZIN	444.52	4.552	4	5		11.834	3.78	6.78
COC1=C(Cl)C=C(CNC2=C(C=NC(=N2)N3CCCC3CO)C(=O)NCC4=NC=CC=N4)C=C1	AVANAFIL	483.96	2.357	3	10		12.803	2.99	5.99
CN(C)CC=CC(=O)NC1=C(OC2CCOC2)C=C3N=CN=C(NC4=CC(=C(F)C=C4)Cl)C3=C1	AFATINIB	485.94	4.34	2	8		12.932	3.34	6.34
CC(C)(C)C1=NC(=C(S1)C2=NC(=NC=C2)N)C3=C(F)C(=CC=C3)N[S](=O)(=O)C4=C(F)C=CC=C4F	DABRAFENIB MESYLATE	519.56	4.61	2	7		12.91	4.54	8.54
CC(C)OC(=O)C(C)N[P@](=O)(OCC1OC([N]2C=C[C](=O)[NH][C]2=O)[C@](C)(F)C1O)OC3=CC=CC=C3	SOFOSBUVIR	529.46	0.844	3	12		12.568	3.55	5.55
CCCN[S](=O)(=O)NC1=C(C(=NC=N1)OCCOC2=NC=C(Br)C=N2)C3=CC=C(Br)C=C3	MACITENTAN	588.28	4.3	2	10		12.656	4.96	7.96
C[N]1[C](=O)C(=C2[N]([C](=O)[N](C3CC3)[C](=O)C2=C1NC4=CC=C(I)C=C4F)C5=CC(=CC=C5)NC(C)=O)C	TRAMETINIB DIMETHYL SULFOXIDE	615.4	4.835	2	9		14.609	4.91	8.91
FC(F)(F)CNC(=O)C1(CCCCN2CCC(CC2)NC(=O)C3=C(C=CC=C3)C4=CC=C(C=C4)C(F)(F)F)C5=CC=CC=C5C6=CC=CC=C16	LOMITAPIDE MESYLATE	693.73	7.001	2	5		18.168	5.86	9.86
COC1=C(C)C2=NC(=CC(=C2C=C1)O[C@@H]3C[C@@H]4[C@@H](C3)C(=O)N(C)CCCC\C=C/[C@@H]5C[C@]5(N=C4O)C(O)=N[S](=O)(=O)C6CC6)C7=NC(=CS7)C(C)C	SIMEPREVIR	749.94	5.955	2	12		19.95	4.14	7.14
CC1=C[N]([C](=O)C=C1)C2=CC=CC=C2	PIRFENIDONE	185.23	2.402	0	2		5.666	3.11	5.11
NC(C(O)C1=CC(=C(O)C=C1)O)C(O)=O	DROXIDOPA	213.19	-2.484	5	6		5.097	-1.89	-0.89
CC(C)(C1=CN=CC=C1)C(=O)C2=CN=CC=C2	METYRAPONE	226.28	1.459	0	3		6.668	3.18	5.18
ClCCN(N=O)C(=O)NC1CCCCC1	LOMUSTINE	233.7	2.755	1	5		5.897	4.64	4.64
CCC(O)=NC[C@@H]1C[C@H]1C2=C3CCOC3=CC=C2	TASIMELTEON	245.32	2.851	1	3		7.046	4.39	5.39
CC(=O)OC1CC2=CC=CC=C2N(C(N)=O)C3=CC=CC=C13	ESLICARBAZEPINE ACETATE	296.33	1.503	1	5		8.303	3.92	5.92
C[C@]12CC[C@H]3[C@@H](CCC4=C3C=CC(=C4)O)[C@@H]1CC[C@@]2(O)C#C	ETHINYL ESTRADIOL	296.41	3.684	2	2		8.753	4.51	5.51
COC1=C(C\C=C(/C)CCC(O)=O)C(=C2C(=O)OCC2=C1C)O	MYCOPHENOLIC ACID	320.34	2.291	2	6		8.271	1.65	2.65
CCCCCCCC(O)=N[C@H](CN1CCCC1)[C@H](O)C2=CC3=C(OCCO3)C=C2	ELIGLUSTAT	404.55	5.323	2	6		11.391	4.21	5.21
CCCCCCCCCCCCCCCCO[P](O)(=O)OCC[N+](C)(C)C	MILTEFOSINE	408.58	3.543	1	5		11.625	5.5	5.5
CC[C@H](NC1=NC=NC2=C1N=C[NH]2)C3=NC4=CC=CC(=C4[C](=O)[N]3C5=CC=CC=C5)F	IDELALISIB	415.43	3.62	2	8		11.45	3.74	8.74
OC(C1=CC=CC=C1)(C2=CC=CC=C2)C34CC[N+](CCOCC5=CC=CC=C5)(CC3)CC4	UMECLIDINIUM BROMIDE	428.6	1.6	1	3		13.222	5.02	8.02
OC1=NN=C(CC2=CC(=C(F)C=C2)C(=O)N3CCN(CC3)C(=O)C4CC4)C5=CC=CC=C15	OLAPARIB	434.47	2.437	1	7		11.766	4.39	7.39
C[N]1N=NC(=N1)C2=CC=C(C=N2)C3=CC=C(C=C3F)N4CC(CO[P](O)(O)=O)OC4=O	TEDIZOLID PHOSPHATE	450.32	-0.505	2	12		10.261	1.53	4.53
OC[C@H]1O[C@H]([C@H](O)[C@@H](O)[C@@H]1O)C2=CC(=C(Cl)C=C2)CC3=CC=C(O[C@H]4CCOC4)C=C3	EMPAGLIFLOZIN	450.91	2.585	4	7		11.51	3.04	5.04
C[C@@H]1CCN(CCN1C(=O)C2=C(C=CC(=C2)C)[N]3N=CC=N3)C4=NC5=C(O4)C=CC(=C5)Cl	SUVOREXANT	450.93	4.791	0	8		12.207	5.61	9.61
CCOC1=C(OC)C=CC(=C1)[C@@H](C[S](C)(=O)=O)N2C(=O)C3=C(C2=O)C(=CC=C3)N=C(C)O	APREMILAST	460.5	1.141	1	9		11.624	3.51	5.51
CCOC(O)=N[C@@H]1CC[C@@H]2[C@@H](C1)C[C@@H]3[C@@H]([C@@H](C)OC3=O)[C@H]2\C=C\C4=NC=C(C=C4)C5=CC(=CC=C5)F	VORAPAXAR SULFATE	492.59	4.386	1	6		13.557	7.32	9.32
COC(=O)C1=CC2=C(C=C1)\C(C(=N2)O)=C(\NC3=CC=C(C=C3)N(C)C(=O)CN4CCN(C)CC4)C5=CC=CC=C5	NINTEDANIB	539.64	2.664	2	9		15.708	4.25	7.25
CC(C)OC1=C(NC2=NC(=C(Cl)C=N2)NC3=CC=CC=C3[S](=O)(=O)C(C)C)C=C(C)C(=C1)C4CCNCC4	CERITINIB	558.14	6.413	3	8		15.3	4.58	7.58
CN1CCN(CC1)C2=NC=C(N(C)C(=O)C(C)(C)C3=CC(=CC(=C3)C(F)(F)F)C(F)(F)F)C(=C2)C4=CC=CC=C4C	NETUPITANT	578.6	6.505	0	5		14.587	9.25	12.25
CC(C)C1=NC(=CS1)CN(C)C(=O)NC(CCN2CCOCC2)C(=O)NC(CCC(CC3=CC=CC=C3)NC(=O)OCC4=CN=CS4)CC5=CC=CC=C5	COBICISTAT	776.03	3.979	3	12		21.701	6.08	10.08
COC(O)=N[C@@H](C(C)C)C(=O)N1CC2(CC2)C[C@H]1C3=NC=C([NH]3)C4=CC5=C(C=C4)C6=C(C=C(C=C6)C7=CC8=C(C=C7)N=C([NH]8)[C@@H]9[C@H]%10CC[C@H](C%10)N9C(=O)[C@@H](N=C(O)OC)C(C)C)C5(F)F	LEDIPASVIR	889.02	6.776	4	14		23.93	5.89	10.89
CCC1=C(C)[NH]C2=C1C(=O)C(CC2)CN3CCOCC3	MOLINDONE HYDROCHLORIDE	276.38	2.572	1	4		7.886	2.98	3.98
OCC1OC(CC1O)[N]2C=C([C](=O)[NH][C]2=O)C(F)(F)F	TRIFLURIDINE	296.2	-0.413	3	7		5.804	0.61	1.61
CC1=C(CCNCC2=CC=C(\C=C\C(O)=N\O)C=C2)C3=CC=CC=C3[NH]1	PANOBINOSTAT LACTATE	349.43	2.663	4	5		11.013	1.3	4.3
CC(C)C[C@H](N=C(O)CN=C(O)C1=C(Cl)C=CC(=C1)Cl)B(O)O	IXAZOMIB CITRATE	361.03	2.631	4	6		8.962
CC(=O)OCC1OC(C(OC(C)=O)C1OC(C)=O)[N]2C=C[C](=O)[NH][C]2=O	URIDINE TRIACETATE	370.31	-0.267	1	11		8.336	2.29	3.29
FC(F)(F)C1=CC(=CC=C1)N2CCN(CC2)CC[N]3[C](=O)[NH]C4=CC=CC=C34	FLIBANSERIN	390.41	4.733	1	5		10.172	6.3	9.3
C[C@H](CCC(O)=O)[C@H]1CC[C@H]2[C@@H]3[C@H](O)C[C@@H]4C[C@H](O)CC[C@]4(C)[C@H]3C[C@H](O)[C@]12C	CHOLIC ACID	408.58	2.427	4	5		11.247	2.17	2.17
CCOC(=O)[C@H](C)C[C@@H](CC1=CC=C(C=C1)C2=CC=CC=C2)NC(=O)CCC(O)=O	SACUBITRIL	411.5	4.469	2	6		11.547	3.13	5.13
COC1=C(C=C2C(=CC=NC2=C1)OC3=CC(=C(NC(O)=NC4CC4)C=C3)Cl)C(O)=N	LENVATINIB	426.86	3.323	4	8		11.177	3.37	6.37
CN(C)C(=O)NC1CCC(CC1)CCN2CCN(CC2)C3=C(Cl)C(=CC=C3)Cl	CARIPRAZINE	427.41	4.98	1	5		11.784	7.14	8.14
O=[C]1[NH]C2=CC(=CC=C2C=C1)OCCCCN3CCN(CC3)C4=C5C=CSC5=CC=C4	BREXPIPRAZOLE	433.57	4.652	1	5		12.81	5.26	9.26
COC1=C(OCCCN2CCOCC2)C=C3C(=NC=NC3=C1)NC4=CC(=C(F)C=C4)Cl	GEFITINIB	446.91	5.452	1	7		11.702	5.74	8.74
CC(=O)C1=C(C)C2=CN=C(NC3=NC=C(C=C3)N4CCNCC4)N=C2[N](C5CCCC5)[C]1=O	PALBOCICLIB	447.54	2.195	2	9		12.609	3.7	6.7
CC1=CC=C(NC(=O)C2(CC2)C3=CC=C4OC(F)(F)OC4=C3)N=C1C5=CC(=CC=C5)C(O)=O	LUMACAFTOR	452.41	6.054	2	7		11.362	3.34	6.34
COC1=C(OC)C=C2CC(=O)N(CCCN(C)CC3CC4=CC(=C(OC)C=C34)OC)CCC2=C1	IVABRADINE HYDROCHLORIDE	468.59	3.266	0	7		13.188	3.17	5.17
CCC1=CC2=C(C=C1N3CCC(CC3)N4CCOCC4)C(C)(C)C5=C(C2=O)C6=C([NH]5)C=C(C=C6)C#N	ALECTINIB HYDROCHLORIDE	482.63	5.533	1	6		14.146	7.04	10.04
C[C@@H]1CN(C[C@H](C)O1)C2=CC=C(NC(=O)C3=CC=CC(=C3C)C4=CC=C(OC(F)(F)F)C=C4)C=N2	SONIDEGIB PHOSPHATE	485.51	5.84	1	6		12.623	7.22	10.22
CC(C)N(CCCCOCC(=O)N[S](C)(=O)=O)C1=NC(=C(N=C1)C2=CC=CC=C2)C3=CC=CC=C3	SELEXIPAG	496.63	4.176	1	8		13.726	4.25	7.25
COC1=C(NC2=NC=CC(=N2)C3=C[N](C)C4=C3C=CC=C4)C=C(NC(=O)C=C)C(=C1)N(C)CCN(C)C	OSIMERTINIB	499.62	4.604	2	9		14.758	4.09	8.09
CC(OC[C@]1(CC[C@]2(CCC(=O)N2)CN1)C3=CC=CC=C3)C4=CC(=CC(=C4)C(F)(F)F)C(F)(F)F	ROLAPITANT HYDROCHLORIDE	500.49	4.707	2	4		11.894	6.61	8.61
OC1(CN(C1)C(=O)C2=C(NC3=C(F)C=C(I)C=C3)C(=C(F)C=C2)F)C4CCCCN4	COBIMETINIB FUMARATE	531.32	5.114	3	5		11.667	3.65	5.65
CN1CCC2=C(C1)SC(=N2)C(=O)NC3CC(CCC3NC(=O)C(=O)NC4=NC=C(Cl)C=C4)C(=O)N(C)C	EDOXABAN TOSYLATE	548.06	0.152	3	11		14.13	3.08	5.08
COC1=CC=C(CN(C(C)C2=NC(=C[NH]2)C3=CC=CC=C3)C(=O)C(N)CC4=C(C)C=C(C=C4C)C(N)=O)C=C1C(O)=O	ELUXADOLINE	569.66	0.72	4	10		16.062	0.82	4.82
COCCOCCOCCOCCOCCOCCOCCOC1CC[C@@]2(O)C3CC4=CC=C(O)C5=C4[C@@]2(CCN3CC=C)C1O5	NALOXEGOL OXALATE	651.79	0.161	2	12		16.993	2.43	3.43
CNCC(=O)OCC1=C(N=CC=C1)N(C)C(=O)OC(C)[N+]2=C[N](C[C@@](O)([C@@H](C)C3=NC(=CS3)C4=CC=C(C=C4)C#N)C5=C(F)C=CC(=C5)F)N=C2	ISAVUCONAZONIUM SULFATE	717.77	-1.153	2	13		18.559	5.51	10.51
COC(=O)NC(C(C)C)C(=O)N1CCCC1C2=NC=C([NH]2)C3=CC=C(C=C3)C4=CC=C(C=C4)C5=CN=C([NH]5)C6CCCN6C(=O)C(NC(=O)OC)C(C)C	DACLATASVIR DIHYDROCHLORIDE	738.89	4.722	4	14		20.432	5.97	9.97
CC(=O)NC(CS)C(O)=O	ACETYLCYSTEINE	163.19	-0.624	2	4		3.896	-0.02	-0.02
CCCC1CN(C(CC)C(N)=O)C(=O)C1	BRIVARACETAM	212.29	1.009	1	4		5.911	1.09	1.09
CNCC1=CC=C(C=C1)C2=C3CCNC(=O)C4=C3C(=CC(=C4)F)[NH]2	RUCAPARIB CAMSYLATE	323.37	3.006	3	4		9.248	2.67	5.67
FC(F)(F)C1=CC(=C(C=C1)C(=O)C2C(=O)CCCC2=O)[N](=O)=O	NITISINONE	329.23	1.384	0	6		6.987	4.84	5.84
FC1=CC=CC=C1C2=NCC(=S)N(CC(F)(F)F)C3=C2C=C(Cl)C=C3	QUAZEPAM	386.79	3.697	0	2		9.499	8.94	10.94
C[C@H](CCCC(C)(C)O)[C@H]1CC[C@H]2\C(CCC[C@]12C)=C\C=C3\C[C@@H](O)CCC3=C	CALCIFEDIOL	400.65	7.269	2	2		12.702	8.6	8.6
OC(=O)CSC1=NN=C(Br)[N]1C2=CC=C(C3CC3)C4=C2C=CC=C4	LESINURAD	404.28	4.012	1	5		9.849	2.8	5.8
CC[C@H]1[C@@H](O)[C@H]2[C@@H]3CC[C@H]([C@H](C)CCC(O)=O)[C@@]3(C)CC[C@@H]2[C@@]4(C)CC[C@@H](O)C[C@@H]14	OBETICHOLIC ACID	420.63	5.362	3	4		12.022	4.49	4.49
CC(C)COC1=CC=C(CNC(=O)N(CC2=CC=C(F)C=C2)C3CCN(C)CC3)C=C1	PIMAVANSERIN TARTRATE	427.56	4.111	1	5		12.362	7.67	9.67
CC(=O)N(CC(O)CO)C1=C(I)C(=C(I)C(=C1I)C(=O)NCC(O)CO)C(=O)NCC(O)CO	IOHEXOL	821.14	-2.444	8	12		14.769	1.11	2.11
CC1(C)CCC(=C(C1)C2=CC=C(Cl)C=C2)CN3CCN(CC3)C4=CC=C(C(=O)N[S](=O)(=O)C5=CC=C(NCC6CCOCC6)C(=C5)[N](=O)=O)C(=C4)OC7=CN=C8[NH]C=CC8=C7	VENETOCLAX	868.45	10.312	3	14		23.639	6.56	11.56
COC(=O)NC(C(C)C)C(=O)N1CCCC1C2=NC(=C[NH]2)C3=CC4=C(C=C3)C5=CC6=C(C=CC(=C6)C7=C[NH]C(=N7)C8CCCN8C(=O)C(NC(=O)OC)C(C)C)[N]5C(O4)C9=CC=CC=C9	ELBASVIR	882.03	6.655	4	16		24.573	5.88	11.88
COC[C@H]1C[C@H](N(C1)C(=O)[C@H](N=C(O)OC)C2=CC=CC=C2)C3=NC=C([NH]3)C4=CC5=C(C=C4)C6=C(OC5)C=C7C(=C6)C=CC8=C7[NH]C(=N8)[C@@H]9CC[C@H](C)N9C(=O)[C@@H](N=C(O)OC)C(C)C	VELPATASVIR	883.02	5.766	4	16		24.353	5.6	11.6
CC(O)C[N]1C(=NC=C1[N](=O)=O)C	SECNIDAZOLE	185.18	-0.148	1	6		4.527	0.29	1.29
O=C(C[N]1C=CN=C1[N](=O)=O)NCC2=CC=CC=C2	BENZNIDAZOLE	260.25	0.9	1	7		6.825	2.03	4.03
CC(NCC1=CC=C(OCC2=CC(=CC=C2)F)C=C1)C(N)=O	SAFINAMIDE MESYLATE	302.35	2.49	2	4		8.46	4.27	6.27
COC1=CC2=C(C=C1OC)C3CC(=O)C(CC(C)C)CN3CC2	DEUTETRABENAZINE	317.43	3.465	0	4		9.074	6.05	7.05
NC(=O)C1=CC=CC2=C[N](N=C12)C3=CC=C(C=C3)C4CCCNC4	NIRAPARIB	320.4	2.722	2	5		9.485	2.15	5.15
COC1=C(OC)C=C2C3CC(OC(=O)C(N)C(C)C)C(CC(C)C)CN3CCC2=C1	VALBENAZINE	418.58	3.974	1	6		11.915	5.41	6.41
CN(C)C(=O)C1=CC2=CN=C(NC3=CC=C(C=N3)N4CCNCC4)N=C2[N]1C5CCCC5	RIBOCICLIB	434.55	1.804	2	9		12.405	2.55	5.55
NC1=NC(=C(F)C=C1F)[N]2C=C(C(O)=O)[C](=O)C3=CC(=C(N4CC(O)C4)C(=C23)Cl)F	DELAFLOXACIN MEGLUMINE	440.76	1.254	3	8		9.974	2.2	5.2
CC(=O)OCC(=O)[C@@]12N=C(C)O[C@@H]1C[C@H]3[C@@H]4CCC5=CC(=O)C=C[C@]5(C)[C@H]4[C@@H](O)C[C@]23C	DEFLAZACORT	441.52	2.86	1	7		11.744	5.01	5.01
COC1=CC=C(NC(=O)C2=CC=C(C=C2)C(=N)N(C)C)C(=C1)C(=O)NC3=CC=C(Cl)C=N3	BETRIXABAN	451.91	3.609	3	8		12.296	2.08	5.08
CC#CC(=O)N1CCCC1C2=NC(=C3[N]2C=CN=C3N)C4=CC=C(C=C4)C(=O)NC5=CC=CC=N5	ACALABRUTINIB	465.52	1.581	2	9		13.319	3.72	7.72
CC(C)(O)CNC1=NC(=NC(=N1)NC2=CC(=NC=C2)C(F)(F)F)C3=NC(=CC=C3)C(F)(F)F	ENASIDENIB MESYLATE	473.38	3.756	3	8		10.422	5.14	8.14
CCN1CCN(CC1)CC2=CC=C(NC3=NC=C(F)C(=N3)C4=CC(=C5N=C(C)[N](C(C)C)C5=C4)F)N=C2	ABEMACICLIB	506.61	4.765	1	8		14.046	4.52	8.52
CC1=N[N](C=C1)C2=CC(=CC=C2C(OC3=NC(=NC(=C3)C4=CC=C(CC(N)C(O)=O)C=C4)N)C(F)(F)F)Cl	TELOTRISTAT ETHYL	546.94	2.293	3	9		13.418	2.03	6.03
CCOC1=C(NC(=O)\C=C\CN(C)C)C=C2C(=C1)N=CC(=C2NC3=CC=C(OCC4=CC=CC=N4)C(=C3)Cl)C#N	NERATINIB MALEATE	557.05	4.997	2	9		15.619	4.55	8.55
CC(C)(NC(=O)C1=C(O)[C@@H]2OC3=C4C(=CC=C3O)C[C@H]5N(CC[C@@]24[C@@]5(O)C1)CC6CC6)C7=NC(=NO7)C8=CC=CC=C8	NALDEMEDINE TOSYLATE	570.65	2.825	4	10		15.44	3.01	6.01
COC1C(CC2O[C@]1(C)[N]3C4=C(C=CC=C4)C5=C3C6=C(C7=C(C=CC=C7)[N]26)C8=C5CNC8=O)N(C)C(=O)C9=CC=CC=C9	MIDOSTAURIN	570.65	5.491	1	8		16.495	5.86	11.86
COC1=CC=CC(=C1)N2CCN(CC2)C3=NC4=C(C=CC=C4F)C(CC(O)=O)N3C5=CC(=CC=C5OC)C(F)(F)F	LETERMOVIR	572.56	7.058	1	8		14.312	4.31	7.31
COC1=CC(=CC=C1NC2=NC=C(Cl)C(=N2)NC3=CC=CC=C3[P](C)(C)=O)N4CCC(CC4)N5CCN(C)CC5	BRIGATINIB	584.1	1.724	2	9		16.242	4.05	7.05
CC(C)(C)C1NC(=O)OC2CCCC2OCC=CC(F)(F)C3=NC4=C(C=CC=C4)N=C3OC5CC(N(C5)C1=O)C(=O)N[C@@]6(CC6C(F)F)C(=O)N[S](=O)(=O)C7(C)CC7	GLECAPREVIR	838.87	4.002	3	15		20.047	3.43	5.43
CCC1C2CN(C1C(=O)N[C@@]3(CC3C(F)F)C(=O)N[S](=O)(=O)C4(C)CC4)C(=O)C(NC(=O)OC5CC5CCCCC(F)(F)C6=C(O2)N=C7C=C(OC)C=CC7=N6)C(C)(C)C	VOXILAPREVIR	868.94	6.69	3	15		21.04	4.67	6.67
CO[C@H](C)[C@H](N=C(O)OC)C(=O)N1CCC[C@H]1C2=NC3=C([NH]2)C=C(F)C(=C3)[C@H]4CC[C@@H](N4C5=CC(=C(N6CCC(CC6)C7=CC=C(F)C=C7)C(=C5)F)F)C8=CC9=C([NH]C(=N9)[C@@H]%10CCCN%10C(=O)[C@@H](N=C(O)OC)[C@@H](C)OC)C=C8F	PIBRENTASVIR	1113.2	7.254	4	18		28.628
CC(C)C[C@H](N=C(O)[C@@H]1CSSC[C@@H]2N=C(O)[C@H](CC(C)C)N=C(O)[C@H](CCC(O)=O)N=C(O)[C@H](CSSC[C@H](N=C(O)[C@H](C)N=C(O)[C@@H](N=C(O)[C@H](CC(O)=N)N=C(O)[C@@H](N=C2O)C(C)C)C(C)C)C(=N[C@@H]([C@@H](C)O)C(=NCC(=N1)O)O)O)N=C(O)[C@H](CCC(O)=O)N=C(O)[C@H](CC(O)=O)N=C(O)[C@@H](N)CC(O)=N)C(O)=O	PLECANATIDE	1681.89	0.124	25	44		40.327
OCCOc1ccc(c2c1B(O)O[C@@H]2CN)Cl	GSK-656	257	0.2	3	5	0	6.3	0	1
OC[C@H]1CN(C(=O)O1)c1ccc(c(c1)F)N1CCN(N=C1)C	Delpazolid	308	1.4	1	7	0	7.9	1.8	2.8
C/C(=C\CNCCNC1C2CC3CC1CC(C2)C3)/CCC=C(C)C	SQ109	331	6.8	2	2	1	10.5	6.3	6.3
CC(=O)NC[C@@H]1OC(=O)N(C1)c1ccc(c(c1)F)N1CCSCC1	Sutezolid	353	1	1	6	0	9.1	3.7	4.7
OCCNC(=O)c1cn(c2c1ncc(c2)C)Cc1ncnc(c1C)OC	TBA-7371	355	1.2	2	7	0	9.6	2.4	5.4
COC(=O)NC[C@@H]1OC(=O)N(C1)c1ccc(c(c1)F)N1CC2(C1)COC2	TBI-223	365	0.7	1	8	0	8.9	3.1	4.1
O=C1CCN(C=C1)c1c(F)cc(c(c1F)F)N1C[C@@H](OC1=O)CNc1ccon1	Contezolid	408	2.3	1	8	0	9.4	3.1	5.1
C[C@H]1COC2(O1)CCN(CC2)c1nc(=O)c2c(s1)c(cc(c2)C(F)(F)F)[N+](=O)[O-]	BTZ043	431	2.5	0	8	0	9.7	6.8	8.8
[O-][N+](=O)c1cc(cc2c1sc(nc2=O)N1CCN(CC1)CC1CCCCC1)C(F)(F)F	Macozinone	456	5.1	0	7	1	11.2	8.9	10.9
O=C1CCc2c(N1)c(F)ccc2OC[C@]1(O)CCN(C[C@H]1O)c1c(F)cc(cc1F)Cl	OPC-167832	457	3.3	3	6	0	10.8	3.9	5.9
CCNC(=O)Nc1nc2c([nH]1)cc(c(c2C1CCCO1)F)c1cnc(nc1)C(OP(=O)(O)O)(C)C	SPR720	508	-0.4	5	11	3	12.3	0.7	3.7
CCc1nc2n(c1C(=O)NCc1ccc(cc1)N1CCC(CC1)c1ccc(cc1)OC(F)(F)F)cc(cc2)Cl	Telacebec	557	7.6	1	6	2	14.5	8.6	12.6
CO[C@@H]1CC[C@H](CC1)/N=c/1\cc2c(cc1Nc1cccnc1OC)nc1c(n2c2ccc(cc2)OC(F)(F)F)cccc1	Riminophenazine	590	6.7	1	8	2	15.8	8.3	12.3
[O-][N+](=O)c1cn2c(n1)OC[C@H](C2)OCc1ccc(cc1)OC(F)(F)F	Pretomanid	359	2.8	0	8	0	7.7	6	8
C[C@]1(COc2ccc(cc2)N2CCC(CC2)Oc2ccc(OC(F)(F)F)cc2)Cn2cc(nc2O1)[N+]([O-])=O	Delamanid	534	5.3	0	10	3	12.9	8	11
NC[C@H]1O[C@H](O[C@@H]2[C@@H](N)C[C@@H](N)[C@H](O[C@H]3O[C@H](CO)[C@@H](O)[C@H](N)[C@H]3O)[C@H]2O)[C@H](O)[C@@H](O)[C@@H]1O	Kanamycin	484	-3.9	11	15	2	11.2	0.9	0.9
C[C@H]1[C@@](C=O)(O)[C@@H](O[C@H]2[C@@H](NC)[C@H](O)[C@@H](O)[C@H](CO)O2)[C@H](O[C@@H]3[C@@H](NC(N)=N)[C@H](O)[C@@H](NC(N)=N)[C@H](O)[C@H]3O)O1	Streptomycin	571	-3.5	14	19	3	13.3	-5	-5
CO[C@H]1\C=C\O[C@@]2(C)Oc3c(C)c(O)c4c(O)c(NC(=O)\C(=C/C=C/[C@H](C)[C@H](O)[C@@H](C)[C@@H](O)[C@@H](C)[C@H](OC(=O)C)[C@@H]1C)\C)cc(O)c4c3C2=O	Rifamycin	698	4.2	13	6	3	18.2	4.6	6.6

## Sheet: Shultz data
SMILES	ChromLogP_v1.value	ChromlogD.value	PFI.PFI_score	aring	charge	chiab	chiral	clogp	clogp_error	cmr	cmr_error	csp3	fsp3	hba	hbd	heavy	hetrat	liphba	liphbd	logdph65	logdph74	logp	mw	neg	pka_ma	pka_mb	pos	sp2	sp3	tpsa	SUBSTANCENAME	Start Marketing Year	Stardrop clogP	Pomona clogP	Crippen clogP	Moka cLogP	MW Sh	HBD Sh	HBA Sh	TPSA Sh	RotB Sh	#C	#sp3C	Fsp3 Sh	#ArRNG Sh
CC(=O)OC1=C(C=CC=C1)C(O)=O	2.31	-0.24	0.76	1	0	0 0	0	1.023	0	4.458	0	1	0.11	3	0	13	0.44	4	1	-1.71	-2.16	1.24	180.16	1	3.41	0	0	10	3	63.6	ASPIRIN	1900	1.48	1.02	1.31	1.6	180.2	1	4	63.6	3	9	1	0.11	1
COC(=O)[C@@H](N1CCC2=C(C1)C=CS2)C3=CC=CC=C3Cl	6.64	6.73	8.73	2	0	1 0	1	4.208	41	8.663	0	5	0.31	1	0	21	0.25	3	0	4.02	4.03	4.03	321.82	0	14	4.77	1	13	8	29.54	CLOPIDOGREL BISULFATE	1900	3.86	4.21	3.67	3.3	321.8	0	3	29.5	4	16	5	0.31	2
CN1CC[C@@]23[C@H]4CCC(=O)[C@@H]2OC5=C(O)C=CC(=C35)C[C@@H]14	3.53	0.98	1.98	1	0	4 0	4	0.72	0	7.791	0	10	0.59	2	1	21	0.24	4	1	-0.28	0.58	1.62	285.34	0	10.11	8.59	1	8	13	49.77	HYDROMORPHONE HYDROCHLORIDE	1926	1.62	0.72	1.63	1.5	285.3	1	4	49.8	0	17	10	0.59	1
NC(N)=N	-2.3	-1.08	-1.08	0	0	0 0	0	-2.387	59	1.57	0	0	0	0	3	4	2	3	3	-3.65	-3.65	-1.24	59.07	0	14	12.55	1	2	2	75.89	GUANIDINE HYDROCHLORIDE	1939	-1.12	-2.39	-1.16	-0.9	59.1	3	3	75.9	0	1	0	0	0
CCC(C)C1(CC)C(=O)NC(=O)NC1=O	3.2	2.61	2.61	0	0	1 0	1	1.583	0	5.482	0	7	0.7	3	2	15	0.5	5	2	1.41	1.19	1.45	212.25	0	7.48	0	0	6	9	75.27	BUTABARBITAL SODIUM	1939	1.65	1.58	0.79	1.5	212.2	2	5	75.3	3	10	7	0.7	0
CCOC(=O)C1(CCN(C)CC1)C2=CC=CC=C2	5.41	3.69	4.69	1	0	0 0	0	2.227	0	7.243	0	8	0.53	1	0	18	0.2	3	0	0.79	1.63	2.46	247.34	0	14	8.16	1	8	10	29.54	MEPERIDINE HYDROCHLORIDE	1942	2.45	2.23	2.21	3	247.3	0	3	29.5	4	15	8	0.53	1
CNC(C)CC1=CC=CC=C1	5.43	1.52	2.52	1	0	1 0	1	1.888	0	4.912	0	4	0.4	0	1	11	0.1	1	1	-0.88	-0.44	2.24	149.24	0	14	10.21	1	6	5	12.03	METHAMPHETAMINE HYDROCHLORIDE	1943	2.07	1.89	1.84	2.1	149.2	1	1	12	3	10	4	0.4	1
CN1C(=O)OC(C)(C)C1=O	2.17	1.57	1.57	0	0	0 0	0	-0.117	40	3.376	0	4	0.67	2	0	10	0.67	4	0	0.5	0.5	0.5	143.14	0	14	0	0	4	6	46.61	TRIMETHADIONE	1946	0.24	-0.12	0.37	1.2	143.1	0	4	46.6	0	6	4	0.67	0
CC[C@@H](CO)NC(=O)[C@H]1CN(C)[C@@H]2CC3=C[NH]C4=CC=CC(=C34)C2=C1	3.47	2.9	4.9	2	0	3 0	3	1.758	0	9.918	0	9	0.45	2	3	25	0.25	5	3	0.15	0.95	1.59	339.44	0	14	7.93	1	13	12	68.36	METHYLERGONOVINE MALEATE	1946	1.97	1.76	1.93	1.7	339.4	3	5	68.4	5	20	9	0.45	2
CCCC1=C[C](=O)[NH][C](=S)[NH]1	2.82	2.99	3.99	1	0	0 0	0	0.971	40	4.94	0	3	0.43	2	2	11	0.57	3	2	1.19	1.12	1.2	170.23	0	8.09	0	0	8	3	48.65	PROPYLTHIOURACIL	1947	0.73	0.97	1.39	1.2	170.2	2	3	48.7	2	7	3	0.43	1
CCC(=O)C(CC(C)N(C)C)(C1=CC=CC=C1)C2=CC=CC=C2	7.21	5	7	2	0	1 0	1	4.167	0	9.778	0	8	0.38	1	0	23	0.1	2	0	2.44	3.29	5.01	309.45	0	14	9.12	1	14	9	20.31	METHADONE HYDROCHLORIDE	1947	3.93	4.17	4.29	3.7	309.4	0	2	20.3	7	21	8	0.38	2
CCN(CC)CCOC(=O)C1(CCCCC1)C2CCCCC2	8.7	6.88	6.88	0	0	0 0	0	6.138	0	9.192	0	18	0.95	1	0	22	0.16	3	0	2.5	3.36	4.93	309.49	0	14	8.96	1	2	20	29.54	DICYCLOMINE HYDROCHLORIDE	1950	5.05	6.14	4.4	4.6	309.5	0	3	29.5	8	19	18	0.95	0
OC(=O)C1=CC(=CC=C1O)N=NC2=CC=C(C=C2)[S](=O)(=O)NC3=NC=CC=C3	3.5	1.9	4.9	3	0	0 1	1	3.995	0	10.563	0	0	0	8	1	28	0.56	9	3	1	0.25	4.25	398.39	2	3.23	0	0	24	3	141.31	SULFASALAZINE	1950	2.84	3.88	3.7	3.6	398.4	3	9	141.3	6	18	0	0	3
NC1CONC1=O	-1.09	-0.05	-0.05	0	0	1 0	1	-1.192	41	2.318	0	2	0.67	2	2	7	1.33	4	2	-2.42	-2.42	-2.42	102.09	0	4.21	8.36	1	2	5	64.35	CYCLOSERINE	1952	-1.2	-1.19	-1.63	-2.1	102.1	2	4	64.4	0	3	2	0.67	0
C[C@]12CCC(=O)C=C1CC[C@H]3[C@@H]4CC[C@](O)(C(=O)CO)[C@@]4(C)CC(O)[C@H]23	4.36	1.72	1.72	0	0	7 0	7	1.887	10	9.789	0	17	0.81	5	3	26	0.24	5	3	1.28	1.28	1.28	362.47	0	12.59	0	0	6	20	94.83	HYDROCORTISONE	1952	1.61	1.7	1.78	1.5	362.5	3	5	94.8	2	21	17	0.81	0
O=C1CN(\N=C\C2=CC=C(O2)[N](=O)=O)C(=O)N1	0.03	0.48	1.48	1	0	0 1	1	-0.467	20	5.496	0	1	0.13	4	1	17	1.12	9	1	-0.23	-0.28	-0.22	238.16	0	8.23	0	0	13	3	120.73	NITROFURANTOIN	1953	-0.47	-0.47	0.07	-0.64	238.2	1	9	120.7	3	8	1	0.13	1
CCC1=C(C(=NC(=N1)N)N)C2=CC=C(Cl)C=C2	4.53	3.32	5.32	2	0	0 0	0	3.003	0	6.934	0	2	0.17	2	2	17	0.33	4	2	1.54	2.23	2.75	248.71	0	14	7.77	0	12	5	77.82	PYRIMETHAMINE	1953	2.54	3	2.52	2.9	248.7	2	4	77.8	2	12	2	0.17	2
O=C1NC(=O)C(N1)(C2=CC=CC=C2)C3=CC=CC=C3	4.02	3.38	5.38	2	0	0 0	0	2.085	0	7.223	0	1	0.07	2	2	19	0.27	4	2	2.14	2.11	2.15	252.27	0	8.49	0	0	16	3	58.2	PHENYTOIN	1953	2.47	2.08	1.77	1.7	252.3	2	4	58.2	2	15	1	0.07	2
CC(COC1=CC=CC=C1)N(CCCl)CC2=CC=CC=C2	7.59	8.03	10.03	2	0	1 0	1	4.917	0	8.996	0	6	0.33	0	0	21	0.11	2	0	3.24	4.03	4.64	303.83	0	14	7.89	1	12	9	12.47	PHENOXYBENZAMINE HYDROCHLORIDE	1953	4.51	4.92	4.2	4.2	303.8	0	2	12.5	8	18	6	0.33	2
C[N+]1(C)C2CC(CC1C3OC23)OC(=O)C(CO)C4=CC=CC=C4	2.03	1.59	2.59	1	1	5 0	5	-2.474	30	8.674	0	11	0.61	3	1	23	0.28	5	1	-3.27	-3.27	-3.27	318.39	0	14	0	1	8	15	59.06	METHSCOPOLAMINE BROMIDE	1953	2.27	-2.47	1.06	-3.3	318.4	1	5	59.1	5	18	11	0.61	1
CN(CC1=CN=C2N=C(N)N=C(N)C2=N1)C3=CC=C(C=C3)C(=O)NC(CCC(O)=O)C(O)=O	-0.55	-0.03	2.97	3	0	1 0	1	-0.529	41	11.642	0	5	0.25	9	3	33	0.65	13	5	-5.45	-6.56	-0.24	454.45	2	3.26	1.8	0	22	11	210.54	METHOTREXATE SODIUM	1953	0.35	-0.53	0.27	-0.25	454.4	5	13	210.5	10	20	5	0.25	3
CN(C)C(=O)OC1=C[N+](=CC=C1)C	0.49	-0.89	0.11	1	1	0 0	0	-4.264	10	4.979	0	3	0.33	1	0	13	0.44	4	0	-3.47	-3.47	-3.47	181.21	0	14	0	1	8	5	33.42	PYRIDOSTIGMINE BROMIDE	1955	1.82	-4.26	0.57	-3.7	181.2	0	4	33.4	3	9	3	0.33	1
COC(=O)C(C1CCCCN1)C2=CC=CC=C2	4.93	2.26	3.26	1	0	2 0	2	2.555	0	6.779	0	7	0.5	1	1	17	0.21	3	1	-0.25	0.57	2.25	233.31	0	14	9.09	1	8	9	38.33	METHYLPHENIDATE HYDROCHLORIDE	1955	2.67	2.56	2.09	2.1	233.3	1	3	38.3	4	14	7	0.5	1
CCN(CCO)CCCC(C)NC1=C2C=CC(=CC2=NC=C1)Cl	5.99	2.09	4.09	2	0	1 0	1	4.116	0	9.722	0	9	0.5	1	2	23	0.22	4	2	-0.92	0.33	2.89	335.88	0	14	9.76	2	10	13	48.39	HYDROXYCHLOROQUINE SULFATE	1955	3.66	4.12	3.78	4.1	335.9	2	4	48.4	9	18	9	0.5	2
CC(C)CCC[C@@H](C)CCC[C@@H](C)CCC\C(C)=C\CC1=C(C)C(=O)C2=C(C=CC=C2)C1=O	13.72	8.62	9.62	1	0	2 1	3	12.012	51	13.975	40	19	0.61	2	0	33	0.06	2	0	9.7	9.7	9.7	450.71	0	14	0	0	14	19	34.14	PHYTONADIONE	1955	7.68	12.01	9.16	9	450.7	0	2	34.1	14	31	19	0.61	1
N[C@@H](CC1=CC(=C(OC2=CC=C(O)C(=C2)I)C(=C1)I)I)C(O)=O	4.83	1.62	3.62	2	0	1 0	1	2.631	0	11.374	0	2	0.13	4	2	23	0.33	5	3	2.79	2.76	2.8	650.98	1	0.3	9.48	1	14	9	92.78	LIOTHYRONINE SODIUM	1956	1.6	2.63	3.95	4.4	651	3	5	92.8	5	15	2	0.13	2
CN1C(=O)CC(C)(C1=O)C2=CC=CC=C2	4.43	3.07	4.07	1	0	1 0	1	1.461	10	5.734	0	4	0.33	2	0	15	0.25	3	0	1.46	1.46	1.46	203.24	0	14	0	0	10	5	37.38	METHSUXIMIDE	1957	1.4	1.46	1.33	0.81	203.2	0	3	37.4	1	12	4	0.33	1
CCN1C(=O)NC(C1=O)C2=CC=CC=C2	3.53	2.04	3.04	1	0	1 0	1	1.482	10	5.639	0	3	0.27	2	1	15	0.36	4	1	1.07	1.07	1.07	204.23	0	11.18	0	0	10	5	49.41	ETHOTOIN	1957	1.15	1.22	1.3	1.4	204.2	1	4	49.4	2	11	3	0.27	1
CC1C[C@H]2[C@@H]3CC[C@](O)(C(=O)CO)[C@@]3(C)CC(O)[C@@H]2[C@@]4(C)C=CC(=O)C=C14	4.28	2.81	2.81	0	0	8 0	8	1.742	0	10.303	0	16	0.73	5	3	27	0.23	5	3	1.56	1.56	1.56	374.48	0	12.59	0	0	8	19	94.83	METHYLPREDNISOLONE	1957	1.94	1.74	1.8	2	374.5	3	5	94.8	2	22	16	0.73	0
CCCCNC1=CC=C(C=C1)C(=O)OCCOCCOCCOCCOCCOCCOCCOCCOCCOC	5.01	5	6	1	0	0 0	0	2.22	0	15.755	0	23	0.77	10	1	42	0.4	12	1	2.35	2.35	2.35	603.75	0	14	3.47	0	8	34	121.4	BENZONATATE	1958	2.45	2.54	2.84	2.4	603.7	1	12	121.4	33	30	23	0.77	1
CCN(CC)C(C)C(=O)C1=CC=CC=C1	5.76	3.66	4.66	1	0	1 0	1	2.85	0	6.34	0	6	0.46	1	0	15	0.15	2	0	1.72	2.38	2.7	205.3	0	14	7.44	1	8	7	20.31	DIETHYLPROPION HYDROCHLORIDE	1959	2.41	2.85	2.6	2.7	205.3	0	2	20.3	5	13	6	0.46	1
CC1=CC(=NO1)C(=O)NNCC2=CC=CC=C2	2.87	2.2	4.2	2	0	0 0	0	0.994	41	6.367	0	2	0.17	3	2	17	0.42	5	2	1.43	1.43	1.43	231.25	0	10.42	2.83	0	13	4	67.16	ISOCARBOXAZID	1959	1.49	0.99	1.42	1.4	231.3	2	5	67.2	5	12	2	0.17	2
CCCC(C)(COC(N)=O)COC(=O)NC(C)C	4.25	4.17	4.17	0	0	1 0	1	2.341	0	6.858	0	10	0.83	2	2	18	0.5	6	2	1.92	1.92	1.92	260.33	0	14	0	0	4	14	90.65	CARISOPRODOL	1959	2.51	2.34	2.02	2.4	260.3	2	6	90.7	10	12	10	0.83	0
CC1C[C@@H]2[C@H](CC[C@@]3(C)[C@H]2CC[C@]3(OC(C)=O)C(C)=O)[C@@]4(C)CCC(=O)C=C14	7.05	7.46	7.46	0	0	7 0	7	4.196	10	10.91	0	19	0.79	3	0	28	0.17	4	0	4.13	4.13	4.13	386.53	0	14	0	0	8	20	60.44	MEDROXYPROGESTERONE ACETATE	1959	3.63	4.01	4.66	3.7	386.5	0	4	60.4	3	24	19	0.79	0
CN1C2CCC1CC(C2)OC(=O)C(CO)C3=CC=CC=C3	4.26	2.04	3.04	1	0	3 0	3	1.299	0	8.146	0	10	0.59	2	1	21	0.24	4	1	-1.22	-0.41	1.57	289.38	0	14	9.39	1	8	13	49.77	ATROPINE SULFATE	1960	2.5	1.3	1.93	2.2	289.4	1	4	49.8	5	17	10	0.59	1
CC(=O)S[C@@H]1CC2=CC(=O)CC[C@]2(C)[C@H]3CC[C@@]4(C)[C@@H](CC[C@@]45CCC(=O)O5)[C@H]13	5.94	8.26	8.26	0	0	7 0	7	2.839	10	11.539	0	19	0.79	3	0	29	0.21	4	0	3.64	3.64	3.64	416.58	0	14	0	0	8	21	60.44	SPIRONOLACTONE	1960	3.11	2.65	4.85	2.9	416.6	0	4	60.4	2	24	19	0.79	0
CCOC(=O)C1(CCN(CC1)CCC(C#N)(C2=CC=CC=C2)C3=CC=CC=C3)C4=CC=CC=C4	7.93	7.94	10.94	3	0	0 0	0	5.331	0	13.671	0	10	0.33	2	0	34	0.13	4	0	3.9	4.76	5.88	452.6	0	14	8.5	1	20	12	53.33	DIPHENOXYLATE HYDROCHLORIDE	1960	5.22	5.33	5.48	6.9	452.6	0	4	53.3	10	30	10	0.33	3
NNCCC1=CC=CC=C1	3.36	1.43	2.43	1	0	0 0	0	1.033	0	4.354	0	2	0.25	2	2	10	0.25	2	2	1.16	1.2	1.2	136.2	0	14	5.55	0	6	4	38.05	PHENELZINE SULFATE	1961	1.78	1.03	0.69	0.78	136.2	2	2	38.1	3	8	2	0.25	1
C[N+]1(C)CCC(C1)OC(=O)C(O)(C2CCCC2)C3=CC=CC=C3	4.69	4.73	5.73	1	1	2 0	2	0.121	30	9.163	0	12	0.63	2	1	23	0.21	4	1	-1.41	-1.41	-1.41	318.44	0	11.53	0	1	8	15	46.53	GLYCOPYRROLATE	1961	2.8	0.12	2.46	-0.23	318.4	1	4	46.5	5	19	12	0.63	1
CC1=CC(=CC(=C1)OCC2CNC(=O)O2)C	4.35	4.43	5.43	1	0	1 0	1	2.145	0	6.005	0	5	0.42	1	1	16	0.33	4	1	2.37	2.37	2.37	221.26	0	13.14	0	0	8	8	47.56	METAXALONE	1962	2.26	2.14	1.79	2.3	221.3	1	4	47.6	3	12	5	0.42	1
N[S](=O)(=O)C1=C(Cl)C=C2NC=N[S](=O)(=O)C2=C1	-0.25	-0.29	0.71	1	0	0 0	0	-1	0	6.14	0	0	0	5	2	17	1.29	7	2	-0.44	-0.45	-0.44	295.71	0	9.1	1.15	0	12	3	118.69	CHLOROTHIAZIDE	1962	0.19	-1	0.13	-0.55	295.7	2	7	118.7	1	7	0	0	1
CC1=NC=C([N]1CCO)[N](=O)=O	0.98	0.09	1.09	1	0	0 0	0	-0.457	0	4.063	0	3	0.5	3	1	12	1	6	1	-0.46	-0.46	-0.46	171.16	0	14	2.81	0	7	4	83.87	METRONIDAZOLE	1963	-0.59	-0.46	0.09	-0.44	171.2	1	6	83.9	3	6	3	0.5	1
CN1C(=O)CN=C(C2=CC=CC=C2)C3=C1C=CC(=C3)Cl	5.66	5.66	7.66	2	0	0 0	0	2.961	0	8.117	0	2	0.13	2	0	20	0.19	3	0	3.08	3.08	3.08	284.74	0	14	2.92	0	16	4	32.67	DIAZEPAM	1963	2.99	2.96	3.15	2.8	284.7	0	3	32.7	1	16	2	0.13	2
CNCCCN1C2=CC=CC=C2CCC3=CC=CC=C13	7.17	3.83	5.83	2	0	0 0	0	4.468	0	8.543	0	6	0.33	0	1	20	0.11	2	1	0.84	1.37	3.9	266.39	0	14	10.02	1	12	8	15.27	DESIPRAMINE HYDROCHLORIDE	1964	3.54	4.47	3.53	3.8	266.4	1	2	15.3	4	18	6	0.33	2
CCC1OC(=O)C(C)C(OC2C[C@@](C)(OC)C(O)C(C)O2)C(C)C(OC3OC(C)CC(C3O)N(C)C)[C@](C)(O)CC(C)C(=O)C(C)C(O)[C@]1(C)O	4.2	4.75	4.75	0	0	18 0	18	1.611	0	18.93	0	35	0.95	12	5	51	0.38	14	5	0.72	1.57	2.6	733.94	0	12.46	8.38	1	4	47	193.91	ERYTHROMYCIN STEARATE	1964	2.54	1.61	1.79	1.8	733.9	5	14	193.9	7	37	35	0.95	0
O=[C]1N=CN=C2[NH][NH]C=C12	-1.49	-1.06	0.94	2	0	0 0	0	-1.056	59	3.386	0	0	0	3	2	10	1	5	2	-1.78	-1.89	-1.76	136.11	0	7.83	0	0	10	0	74.43	ALLOPURINOL	1966	-0.04	-1.06	-0.4	-1.3	136.1	2	5	74.4	0	5	0	0	1
CNC1=NC2=C(C=C(Cl)C=C2)C(=[N](=O)C1)C3=CC=CC=C3	4.89	2.97	4.97	2	0	0 0	0	2.465	40	8.539	0	2	0.13	1	1	21	0.25	4	1	2.79	3.01	3.05	299.76	0	14	6.43	0	16	4	53.14	CHLORDIAZEPOXIDE HYDROCHLORIDE	1966	3.37	3.79	2.95	1.4	299.8	1	4	53.1	2	16	2	0.13	2
N[S](=O)(=O)C1=C(Cl)C=C(NCC2=CC=CO2)C(=C1)C(O)=O	2.02	0.66	2.66	2	0	0 0	0	1.9	0	7.631	0	1	0.08	4	2	21	0.67	7	3	-0.48	-1.25	1.75	330.74	1	4.25	0	0	15	5	122.63	FUROSEMIDE	1966	2.03	1.9	1.89	1.8	330.7	3	7	122.6	5	12	1	0.08	2
OCC1OC(OC2C(CO)O[C@](O)(CO)C2O)C(O)C(O)C1O	-2.92	0.11	0.11	0	0	9 0	9	-3.59	0	7.072	0	12	1	11	8	23	0.92	11	8	-4.53	-4.53	-4.53	342.3	0	10.28	0	0	0	23	189.53	LACTULOSE	1966	-3.01	-3.59	-5.4	-5.6	342.3	8	11	189.5	5	12	12	1	0
CC1=C(C)C(=CC=C1)NC2=CC=CC=C2C(O)=O	6.32	2.95	4.95	2	0	0 0	0	5.137	0	7.149	0	2	0.13	2	1	18	0.2	3	2	2.83	2.18	5.4	241.29	1	3.89	0	0	14	4	49.33	MEFENAMIC ACID	1967	5.12	5.29	3.75	4.6	241.3	2	3	49.3	3	15	2	0.13	2
CCC(=C)C(=O)C1=CC=C(OCC(O)=O)C(=C1Cl)Cl	5.25	3.54	4.54	1	0	0 0	0	3.445	0	7.346	0	3	0.23	3	0	19	0.31	4	1	0.35	0.16	3.66	303.14	1	2.8	0	0	12	7	63.6	ETHACRYNIC ACID	1967	3.41	3.44	3.61	2.8	303.1	1	4	63.6	6	13	3	0.23	1
CCN(CC)CCOC1=CC=C(C=C1)\C(=C(\Cl)C2=CC=CC=C2)C3=CC=CC=C3	9.33	6.45	9.45	3	0	0 1	1	7.151	51	12.561	0	6	0.23	0	0	29	0.08	2	0	3.75	4.57	6.47	405.97	0	14	9.31	1	20	9	12.47	CLOMIPHENE CITRATE	1967	6.24	7.15	6.56	6.5	406	0	2	12.5	9	26	6	0.23	3
CC1[C@H]2C(O)[C@H]3C(N(C)C)C(=C(C(N)=O)C(=O)[C@@]3(O)C(=C2C(=O)C4=C1C=CC=C4O)O)O	0.76	1.96	2.96	1	0	6 0	6	-0.499	10	11.288	0	9	0.41	8	6	32	0.45	10	6	-3.33	-3.57	-3.29	444.44	0	2.92	7.46	1	16	16	181.62	DOXYCYCLINE HYCLATE	1967	-0.25	-0.51	-0.35	-0.64	444.4	6	10	181.6	2	22	9	0.41	1
NC(=O)N1C2=CC=CC=C2C=CC3=CC=CC=C13	4.89	4.28	6.28	2	0	0 0	0	2.38	0	7.161	0	0	0	1	1	18	0.2	3	1	2.77	2.77	2.77	236.27	0	14	0	0	16	2	46.33	CARBAMAZEPINE	1968	2.19	2.38	3.39	2.9	236.3	1	3	46.3	1	15	0	0	2
C[N]1C=NC(=C1SC2=NC=NC3=C2[NH]C=N3)[N](=O)=O	0.95	2.37	5.37	3	0	0 0	0	0.512	0	6.784	0	1	0.11	5	1	19	1.11	9	1	1.17	1.15	1.17	277.26	0	8.64	2.13	0	16	2	118.1	AZATHIOPRINE	1968	0.68	0.51	1.15	0.85	277.3	1	9	118.1	3	9	1	0.11	3
CC1(C)S[C@@H]2[C@H](NC(=O)COC3=CC=CC=C3)C(=O)N2[C@H]1C(O)=O	3.24	0.82	1.82	1	0	3 0	3	1.944	30	8.929	0	7	0.44	4	1	24	0.5	7	2	-2.21	-2.64	0.76	350.39	1	3.39	0	0	12	12	95.94	PENICILLIN V POTASSIUM	1968	1.93	1.94	0.7	1.9	350.4	2	7	95.9	6	16	7	0.44	1
OCCOCCN1CCN(CC1)C(C2=CC=CC=C2)C3=CC=C(Cl)C=C3	6.29	5.54	7.54	2	0	1 0	1	3.995	0	10.732	0	9	0.43	2	1	26	0.19	4	1	2.42	3.09	3.41	374.91	0	14	7.45	1	12	14	35.94	HYDROXYZINE PAMOATE	1968	3.25	4	3.06	3.1	374.9	1	4	35.9	8	21	9	0.43	2
CC(C)(S)[C@@H](N)C(O)=O	0.76	-0.9	-0.9	0	0	1 0	1	-1.729	0	3.86	0	4	0.8	2	2	9	0.8	3	2	-2.15	-2.15	-2.15	149.21	1	2.56	9.09	1	2	7	63.32	PENICILLAMINE	1970	-1.91	-1.73	0.11	-0.16	149.2	2	3	63.3	2	5	4	0.8	0
CCC[C@@H]1C[C@H](N(C)C1)C(O)=N[C@H]([C@H](C)Cl)[C@H]2O[C@H](SC)[C@H](O)[C@@H](O)[C@H]2O	4.42	2.52	2.52	0	0	9 1	10	2.81	59	10.794	0	17	0.94	6	4	27	0.44	7	4	-0.8	-0.87	-0.79	424.98	0	3.13	7.98	1	2	25	105.75	CLINDAMYCIN HYDROCHLORIDE	1970	2.14	2.81	1.23	2.5	425	4	7	105.8	7	18	17	0.94	0
NC(=O)C1=NC=CN=C1	-0.24	-0.62	0.38	1	0	0 0	0	-0.676	0	3.135	0	0	0	3	1	9	0.8	4	1	-1.23	-1.23	-1.23	123.11	0	13.06	0	0	8	1	68.87	PYRAZINAMIDE	1971	-1.2	-0.68	-0.42	-1	123.1	1	4	68.9	1	5	0	0	1
NC1=C(F)C=N[C](=O)[NH]1	-1.05	-0.53	0.47	1	0	0 0	0	-1.635	0	2.864	0	0	0	2	2	9	1	4	2	-0.96	-1.01	-0.95	129.09	0	8.16	0	0	7	2	71.77	FLUCYTOSINE	1971	-1.06	-1.63	-0.51	-2.3	129.1	2	4	71.8	0	4	0	0	1
CC1=C(N2[C@H](SC1)C(NC(=O)C(N)C3=CC=CC=C3)C2=O)C(O)=O	0.51	-0.15	0.85	1	0	3 0	3	-1.84	41	9.195	0	5	0.31	4	2	24	0.5	7	3	-2.2	-2.49	-2.14	347.39	1	3.45	7.23	1	14	10	112.73	CEPHALEXIN	1971	-1.77	-1.84	0.44	-0.27	347.4	3	7	112.7	5	16	5	0.31	1
CC1=C(C(=O)NC2[C@H]3SC(C)(C)C(N3C2=O)C(O)=O)C(=NO1)C4=C(Cl)C=CC=C4Cl	4.3	1.88	3.88	2	0	3 0	3	2.981	30	11.273	0	7	0.37	5	1	30	0.47	8	2	0.22	-0.38	2.91	470.32	1	3.75	0	0	17	13	112.74	DICLOXACILLIN SODIUM	1971	2.91	2.98	3.2	3.3	470.3	2	8	112.7	5	19	7	0.37	2
CO[C@H]1\C=C\O[C@@]2(C)OC3=C(C2=O)C4=C(O)C(=C(NC(=O)\C(=C/C=C/[C@H](C)[C@H](O)[C@@H](C)[C@@H](O)[C@@H](C)[C@H](OC(C)=O)[C@@H]1C)C)C(=C4C(=C3C)O)O)\C=N\N5CCN(C)CC5	3.72	4.29	6.29	2	0	9 4	13	3.71	0	22.008	40	23	0.53	10	6	59	0.37	16	6	2.77	2.87	2.95	822.95	0	6.8	7.37	1	24	35	220.15	RIFAMPIN	1971	3.03	3.71	4.34	4.6	822.9	6	16	220.1	5	43	23	0.53	2
NNC(=O)C1=CC=NC=C1	0.1	-0.64	0.36	1	0	0 0	0	-0.668	0	3.714	0	0	0	3	2	10	0.67	4	2	-0.69	-0.69	-0.69	137.14	0	13.61	3.35	0	8	2	68.01	ISONIAZID	1972	-0.57	-0.67	-0.31	-1	137.1	2	4	68	2	6	0	0	1
OC(=O)C1N=C(C2=CC=CC=C2)C3=C(NC1=O)C=CC(=C3)Cl	3.38	1.32	3.32	2	0	1 0	1	2.51	0	8.306	0	1	0.06	4	1	22	0.31	5	2	0.19	-0.22	3.21	314.73	1	3.32	0	0	18	4	78.76	CLORAZEPATE DIPOTASSIUM	1972	1.93	2.51	2.58	2.4	314.7	2	5	78.8	2	16	1	0.06	2
C[C@]1(O)CC[C@H]2[C@@H]3CC[C@H]4CC(=O)\C(C[C@]4(C)[C@H]3CC[C@]12C)=C/O	6.44	4.53	4.53	0	0	7 1	8	4.137	10	9.6	0	18	0.86	3	2	24	0.14	3	2	3.55	3.54	3.55	332.48	0	8.87	0	0	4	20	57.53	OXYMETHOLONE	1972	3.62	3.99	4.4	3.5	332.5	2	3	57.5	0	21	18	0.86	0
C[C@]12CC(=O)[C@H]3[C@@H](CCC4=CC(=O)C=C[C@]34C)[C@@H]1CC[C@]2(O)C(=O)CO	4.21	2.56	2.56	0	0	6 0	6	1.661	0	9.722	0	14	0.67	5	2	26	0.24	5	2	1.66	1.66	1.66	358.43	0	12.58	0	0	10	16	91.67	PREDNISONE	1972	1.47	1.66	1.77	1.4	358.4	2	5	91.7	2	21	14	0.67	0
CC(=O)OCC(=O)[C@@]1(O)CC[C@H]2[C@@H]3CCC4=CC(=O)CC[C@]4(C)[C@H]3C(=O)C[C@]12C	4.73	3.54	3.54	0	0	6 0	6	2.022	10	10.635	0	17	0.74	5	1	29	0.26	6	1	2.1	2.1	2.1	402.49	0	12.6	0	0	10	19	97.74	CORTISONE ACETATE	1972	2.1	1.83	2.56	1.8	402.5	1	6	97.7	4	23	17	0.74	0
CCCC(C)(COC(N)=O)COC(N)=O	2.54	2.68	2.68	0	0	0 0	0	0.915	0	5.467	0	7	0.78	2	2	15	0.67	6	2	0.93	0.93	0.93	218.25	0	14	0	0	4	11	104.64	MEPROBAMATE	1973	1.51	0.91	0.98	0.91	218.3	2	6	104.6	8	9	7	0.78	0
CC(CN1C2=CC=CC=C2SC3=CC=CC=C13)N(C)C	7.14	4.31	6.31	2	0	1 0	1	4.6	0	8.885	0	5	0.29	0	0	20	0.18	2	0	1.79	2.64	4.29	284.42	0	14	9.05	1	12	8	6.48	PROMETHAZINE HYDROCHLORIDE	1973	4.81	4.4	4.24	4.2	284.4	0	2	6.5	3	17	5	0.29	2
N[S](=O)(=O)C1=C(Cl)C=C2NCN[S](=O)(=O)C2=C1	-0.21	0.84	1.84	1	0	0 0	0	-0.365	0	6.318	0	1	0.14	4	3	17	1.29	7	3	-0.58	-0.58	-0.58	297.73	0	9.09	0	0	10	5	118.36	HYDROCHLOROTHIAZIDE	1973	-0.07	-0.36	-0.35	-0.22	297.7	3	7	118.4	1	7	1	0.14	1
C[C@]12CC[C@H]3[C@@H](CCC4=CC(=O)CC[C@H]34)[C@@H]1CC[C@@]2(O)C#C	5.91	5.44	5.44	0	0	6 0	6	2.79	10	8.78	0	15	0.75	2	1	22	0.1	2	1	3.22	3.22	3.22	298.43	0	14	0	0	4	16	37.3	NORETHINDRONE	1973	2.97	2.78	3.49	3	298.4	1	2	37.3	1	20	15	0.75	0
C[C@]1(O)CC[C@H]2[C@@H]3CCC4=CC(=O)CC[C@]4(C)[C@H]3CC[C@]12C	6.81	5.58	5.58	0	0	6 0	6	3.928	10	8.983	0	17	0.85	2	1	22	0.1	2	1	3.65	3.65	3.65	302.46	0	14	0	0	4	18	37.3	METHYLTESTOSTERONE	1973	3.49	3.74	4.27	3.7	302.5	1	2	37.3	0	20	17	0.85	0
CN(C)CCCN1C2=CC=CC=C2SC3=C1C=C(Cl)C=C3	7.92	4.55	6.55	2	0	0 0	0	5.5	0	9.377	0	5	0.29	0	0	21	0.18	2	0	1.9	2.74	4.54	318.86	0	14	9.2	1	12	9	6.48	CHLORPROMAZINE HYDROCHLORIDE	1973	5.29	5.3	4.89	5.2	318.9	0	2	6.5	4	17	5	0.29	2
CC1NC2=CC(=C(C=C2C(=O)N1C3=CC=CC=C3C)[S](N)(=O)=O)Cl	3.42	4.13	6.13	2	0	1 0	1	2.056	0	9.383	0	3	0.19	3	2	24	0.44	6	2	2.94	2.94	2.94	365.83	0	9.54	0	0	16	7	92.5	METOLAZONE	1973	2.59	2.06	2.71	3.5	365.8	2	6	92.5	2	16	3	0.19	2
CC(C)C(C)C=CC(C)[C@H]1CC[C@H]2C(CCC[C@]12C)=CC=C3CC(O)CCC3=C	11.63	9.78	9.78	0	0	6 3	9	9.391	51	12.987	0	20	0.71	1	1	29	0.04	1	1	7.05	7.05	7.05	396.66	0	14	0	0	8	21	20.23	ERGOCALCIFEROL	1974	7	9.39	7.64	8.4	396.7	1	1	20.2	5	28	20	0.71	0
C[C@@](CC1=CC(=C(O)C=C1)O)(NN)C(O)=O	-0.32	-2.25	-1.25	1	0	1 0	1	-0.445	0	5.776	0	3	0.3	6	4	16	0.6	6	5	-1.94	-2.53	-1.21	226.23	1	2.35	5.66	0	8	8	115.81	CARBIDOPA	1975	0.33	-0.44	-0.05	0.38	226.2	5	6	115.8	4	10	3	0.3	1
COC(=O)NC1=NC2=C([NH]1)C=C(C=C2)C(=O)C3=CC=CC=C3	3.87	3.92	6.92	3	0	0 0	0	3.077	0	8.091	0	1	0.06	3	2	22	0.38	6	2	3.25	3.23	3.26	295.3	0	8.44	3.93	0	19	3	84.08	MEBENDAZOLE	1975	2.83	3.08	2.97	3	295.3	2	6	84.1	5	16	1	0.06	3
ClC1=CC=CC=C1C2=NCC(=O)NC3=C2C=C(C=C3)[N](=O)=O	3.89	4.99	6.99	2	0	0 0	0	2.384	0	8.264	0	1	0.07	3	1	22	0.4	6	1	3.15	3.15	3.15	315.71	0	11.89	1.86	0	18	3	87.28	CLONAZEPAM	1975	2.36	2.38	3.04	2.7	315.7	1	6	87.3	2	15	1	0.07	2
CCN(CC)CCCC(C)NC1=C2C=CC(=CC2=NC=C1)Cl	7.08	3.89	5.89	2	0	1 0	1	5.06	0	9.568	0	9	0.5	0	1	22	0.17	3	1	-0.14	0.88	3.93	319.88	0	14	10.32	2	10	12	28.16	CHLOROQUINE PHOSPHATE	1975	4.63	5.06	4.81	5.3	319.9	1	3	28.2	8	18	9	0.5	2
CC1C[C@H]2[C@@H]3CCC4=CC(=O)C=C[C@]4(C)[C@@]3(F)C(O)C[C@]2(C)[C@@]1(O)C(=O)CO	4.41	3.11	3.11	0	0	8 0	8	1.785	0	10.319	0	16	0.73	5	3	28	0.23	5	3	1.68	1.68	1.68	392.47	0	12.42	0	0	8	20	94.83	DEXAMETHASONE	1975	2.01	1.79	1.9	1.7	392.5	3	5	94.8	2	22	16	0.73	0
CC(N)CC1=CC=CC=C1	4.84	0.71	1.71	1	0	1 0	1	1.742	0	4.449	0	3	0.33	0	1	10	0.11	1	1	-1.11	-0.67	1.8	135.21	0	14	10.01	1	6	4	26.02	DEXTROAMPHETAMINE SULFATE	1976	1.76	1.74	1.58	1.8	135.2	1	1	26	2	9	3	0.33	1
C1N2CN3CN1CN(C2)C3	4.17	-0.75	-0.75	0	0	0 0	0	2.435	0	3.903	0	6	1	0	0	10	0.67	4	0	0.3	0.38	0.39	140.19	0	14	5.88	1	0	10	12.96	METHENAMINE HIPPURATE	1976	-0.25	2.43	-1.02	1.6	140.2	0	4	13	0	6	6	1	0
CC(C)CC1(CC=C)C(=O)NC(=O)NC1=O	3.27	2.96	2.96	0	0	0 0	0	1.628	0	5.921	0	6	0.55	3	2	16	0.45	5	2	1.55	1.33	1.59	224.26	0	7.48	0	0	8	8	75.27	BUTALBITAL	1976	1.72	1.63	0.96	1.6	224.3	2	5	75.3	4	11	6	0.55	0
COC1=CC2=C(C=C1)C=C(C=C2)C(C)C(O)=O	4.73	1.69	3.69	2	0	1 0	1	2.816	0	6.574	0	3	0.21	2	0	17	0.21	3	1	0.7	-0.05	2.99	230.26	1	4.19	0	0	12	5	46.53	NAPROXEN	1976	3.34	2.82	3.04	2.9	230.3	1	3	46.5	3	14	3	0.21	2
COC1=CC=CC=C1OCC(O)COC(N)=O	2.12	2.22	3.22	1	0	1 0	1	0.146	0	6.024	0	4	0.36	2	2	17	0.55	6	2	0.45	0.45	0.45	241.24	0	13.63	0	0	8	9	91.01	METHOCARBAMOL	1976	0.42	0.15	0.53	0.26	241.2	2	6	91	7	11	4	0.36	1
CN(C)CCCN1C2=CC=CC=C2CCC3=CC=CC=C13	7.68	4.13	6.13	2	0	0 0	0	5.037	0	9.006	0	7	0.37	0	0	21	0.11	2	0	1.64	2.48	4.28	280.42	0	14	9.2	1	12	9	6.48	IMIPRAMINE HYDROCHLORIDE	1976	4.44	5.04	3.88	4.3	280.4	0	2	6.5	4	19	7	0.37	2
CCCN(CCC)[S](=O)(=O)C1=CC=C(C=C1)C(O)=O	4.72	1.78	2.78	1	0	0 0	0	3.371	0	7.365	0	6	0.46	4	0	19	0.46	5	1	-0.42	-0.92	2.44	285.36	1	3.53	0	0	10	8	74.68	PROBENECID	1976	3.21	3.37	2.2	3.3	285.4	1	5	74.7	7	13	6	0.46	1
COC1=CC2=C(C=CN=C2C=C1)C(O)[C@H]3C[C@@H]4CCN3CC4C=C	4.99	2.4	4.4	2	0	5 0	5	2.785	0	9.562	0	9	0.45	2	1	24	0.2	4	1	0.01	0.86	2.51	324.42	0	13.89	9.05	1	12	12	45.59	QUINIDINE SULFATE	1976	2.64	2.79	3.17	2.9	324.4	1	4	45.6	4	20	9	0.45	2
CC(=O)NC1=CC=C(O)C=C1	2.03	0.44	1.44	1	0	0 0	0	0.494	0	4.174	0	1	0.13	2	2	11	0.38	3	2	0.91	0.9	0.91	151.16	0	9.46	0	0	8	3	49.33	ACETAMINOPHEN	1977	0.47	0.49	1.35	0.76	151.2	2	3	49.3	2	8	1	0.13	1
CC1C(OCCN1C)C2=CC=CC=C2	5.32	2.6	3.6	1	0	2 0	2	2.125	0	5.816	0	6	0.5	1	0	14	0.17	2	0	1.33	1.93	2.17	191.27	0	14	7.28	1	6	8	12.47	PHENDIMETRAZINE TARTRATE	1977	1.81	2.13	2.08	2.2	191.3	0	2	12.5	1	12	6	0.5	1
CN(C)CCC=C1C2=CC=CC=C2CCC3=CC=CC=C13	7.75	4.73	6.73	2	0	0 0	0	4.851	0	9.152	0	6	0.3	0	0	21	0.05	1	0	1.75	2.48	4.81	277.41	0	14	9.76	1	14	7	3.24	AMITRIPTYLINE HYDROCHLORIDE	1977	4.92	4.85	4.17	4.6	277.4	0	1	3.2	3	20	6	0.3	2
CC(C)N(CCC(C(N)=O)(C1=CC=CC=C1)C2=NC=CC=C2)C(C)C	4.82	2.64	4.64	2	0	1 0	1	2.576	0	10.4	0	9	0.43	2	1	25	0.19	4	1	0.11	0.57	3.47	339.48	0	14	10.42	1	14	11	59.22	DISOPYRAMIDE PHOSPHATE	1977	2.71	2.58	3.36	2.2	339.5	1	4	59.2	8	21	9	0.43	2
CCCC(CCC)C(O)=O	4.8	-0.42	-0.42	0	0	0 0	0	2.76	0	4.077	0	7	0.88	2	0	10	0.25	2	1	1.43	0.56	2.8	144.21	1	5.14	0	0	2	8	37.3	VALPROIC ACID	1978	2.75	2.76	2.29	2.6	144.2	1	2	37.3	5	8	7	0.88	0
CCC1(C(=O)NCNC1=O)C2=CC=CC=C2	2.74	0.21	1.21	1	0	0 0	0	0.882	0	6.103	0	4	0.33	2	2	16	0.33	4	2	1.12	1.12	1.12	218.26	0	11.5	0	0	10	6	58.2	PRIMIDONE	1978	0.91	0.88	0.54	1.3	218.3	2	4	58.2	2	12	4	0.33	1
CC(=O)NC1=NN=C(S1)[S](N)(=O)=O	-0.85	-0.32	0.68	1	0	0 0	0	-0.981	0	4.649	0	1	0.25	5	2	13	2	7	2	-1.16	-1.51	-1.04	222.24	0	6.93	0	0	9	3	115.04	ACETAZOLAMIDE	1978	-0.28	-0.98	-0.86	-1.5	222.2	2	7	115	3	4	1	0.25	1
O=[N](=O)OC1CO[C@@H]2C(CO[C@H]12)O[N](=O)=O	0.17	5.02	5.02	0	0	4 0	4	0.219	0	4.441	0	6	1	6	0	16	1.67	10	0	0.44	0.44	0.44	236.14	0	14	0	0	4	10	128.56	ISOSORBIDE DINITRATE	1978	1.17	-3.5	-1.06	0.82	236.1	0	10	128.6	4	6	6	1	0
CN(C)CCOC(C)(C1=CC=CC=C1)C2=CC=CC=N2	5.3	2.73	4.73	2	0	1 0	1	2.354	0	8.293	0	6	0.35	2	0	20	0.18	3	0	0.62	1.48	2.96	270.38	0	14	8.87	1	12	8	25.36	DOXYLAMINE SUCCINATE	1978	2.86	2.35	2.92	2.6	270.4	0	3	25.4	6	17	6	0.35	2
COC1=C2O[C@H]3C(O)C=C[C@H]4[C@H]5CC(=C2[C@@]34CCN5C)C=C1	3.89	0.95	1.95	1	0	5 0	5	0.977	0	8.347	0	10	0.56	1	1	22	0.22	4	1	-1.29	-0.45	1.34	299.37	0	13.78	9.19	1	8	14	41.93	CODEINE PHOSPHATE	1978	1.14	0.98	1.5	1.3	299.4	1	4	41.9	1	18	10	0.56	1
CC1(C)S[C@@H]2C(NC(=O)C(N)C3=CC=C(O)C=C3)C(=O)N2C1C(O)=O	-0.45	-0.23	0.77	1	0	4 0	4	-1.872	41	9.298	0	7	0.44	5	3	25	0.56	8	4	-2.37	-2.67	-2.31	365.4	1	3.23	7.22	1	12	13	132.96	AMOXICILLIN	1978	-1.99	-1.87	0.02	0.42	365.4	4	8	133	5	16	7	0.44	1
C[C@](N)(CC1=CC=C(O)C=C1)C(O)=O	0.14	-2.01	-1.01	1	0	1 0	1	-1.667	30	5.254	0	3	0.3	3	2	14	0.4	4	3	-1.06	-1.06	-1.06	195.22	1	2.06	9.93	1	8	6	83.55	METYROSINE	1979	-1.94	-1.67	0.74	0.82	195.2	3	4	83.6	3	10	3	0.3	1
NC1=CC=C(C=C1)[S](=O)(=O)C2=CC=C(N)C=C2	2.68	1.11	3.11	2	0	0 0	0	0.886	0	6.81	0	0	0	2	2	17	0.42	4	2	1.27	1.27	1.27	248.3	0	14	2.39	0	14	2	86.18	DAPSONE	1979	0.97	0.89	1.68	0.97	248.3	2	4	86.2	2	12	0	0	2
CC(C)(C)NCC(O)COC1=CC=CC2=C1CC(O)C(O)C2	3.17	0.51	1.51	1	0	3 0	3	0.379	0	8.594	0	11	0.65	3	4	22	0.29	5	4	-2.08	-1.44	0.87	309.41	0	14	9.76	1	6	16	81.95	NADOLOL	1979	0.71	0.38	0.63	1.1	309.4	4	5	82	6	17	11	0.65	1
NNC1=NN=CC2=CC=CC=C12	2.1	0.88	2.88	2	0	0 0	0	1.173	0	4.692	0	0	0	3	2	12	0.5	4	2	-1.55	-0.73	0.75	160.18	0	14	8.88	0	10	2	63.83	HYDRALAZINE HYDROCHLORIDE	1980	1.67	1.17	0.92	0.92	160.2	2	4	63.8	1	8	0	0	2
OCCN(CCO)C1=NC2=C(N=C(N=C2N3CCCCC3)N(CCO)CCO)C(=N1)N4CCCCC4	3.34	2.51	4.51	2	0	0 0	0	1.492	0	13.613	0	18	0.75	8	4	36	0.5	12	4	1.81	1.81	1.81	504.64	0	14	3.54	0	10	26	145.44	DIPYRIDAMOLE	1980	1.99	1.49	-0.02	2	504.6	4	12	145.4	12	24	18	0.75	2
CC(C)(N)CC1=CC=CC=C1	5.19	1.32	2.32	1	0	0 0	0	2.141	0	4.912	0	4	0.4	0	1	11	0.1	1	1	-0.87	-0.55	2.08	149.24	0	14	10.25	1	6	5	26.02	PHENTERMINE HYDROCHLORIDE	1981	2.04	2.14	1.97	1.9	149.2	1	1	26	2	10	4	0.4	1
CC1=NN=C2CN=C(C3=CC=CC=C3)C4=C(C=CC(=C4)Cl)[N]12	5.19	5.03	8.03	3	0	0 0	0	2.555	41	8.84	0	2	0.12	3	0	22	0.24	4	0	3.01	3.02	3.02	308.77	0	14	5.01	0	19	3	43.07	ALPRAZOLAM	1981	2.12	2.55	3.58	2	308.8	0	4	43.1	1	17	2	0.12	3
N[S](=O)(=O)C1=C(Cl)C=CC(=C1)C2(O)NC(=O)C3=CC=CC=C23	1.48	2.69	4.69	2	0	1 0	1	0.448	30	8.24	0	1	0.07	4	3	22	0.5	6	3	1.6	1.59	1.6	338.76	0	8.76	0	0	16	5	109.49	CHLORTHALIDONE	1981	0.87	0.45	0.92	0.85	338.8	3	6	109.5	2	14	1	0.07	2
COC(=O)C1=C(C)NC(=C(C1C2=CC=CC=C2[N](=O)=O)C(=O)OC)C	4.34	4.13	5.13	1	0	0 0	0	3.125	20	9.072	0	5	0.29	3	1	25	0.47	8	1	1.82	1.82	1.82	346.34	0	14	0	0	16	8	110.45	NIFEDIPINE	1981	2.86	3.12	2.18	2.4	346.3	1	8	110.4	6	17	5	0.29	1
CC(C)[N+](C)(CCOC(=O)C1C2=CC=CC=C2OC3=CC=CC=C13)C(C)C	5.51	6.18	8.18	2	1	0 0	0	1.493	30	10.924	0	10	0.43	2	0	27	0.17	4	0	0.36	0.36	0.36	368.5	0	14	0	1	14	13	35.53	PROPANTHELINE BROMIDE	1981	5.1	1.49	4.73	2.7	368.5	0	4	35.5	7	23	10	0.43	2
CC1=CC(=CC=C1)CN2CCN(CC2)C(C3=CC=CC=C3)C4=CC=C(Cl)C=C4	8.87	8.4	11.4	3	0	1 0	1	6.732	0	12.009	0	7	0.28	0	0	28	0.08	2	0	5.16	5.91	6.39	390.96	0	14	7.71	1	18	10	6.48	MECLIZINE HYDROCHLORIDE	1981	5.76	6.73	5.56	5.8	391	0	2	6.5	5	25	7	0.28	3
CN1CCN(CCCN2C3=CC=CC=C3SC4=C2C=C(C=C4)C(F)(F)F)CC1	7.55	5.99	7.99	2	0	0 0	0	4.892	0	10.978	0	9	0.43	0	0	28	0.19	3	0	3.16	3.97	4.66	407.5	0	14	7.99	1	12	16	9.72	TRIFLUOPERAZINE HYDROCHLORIDE	1981	4.76	4.69	4.95	5.2	407.5	0	3	9.7	5	21	9	0.43	2
C[N]1[C](=O)[N](C)C2=C([NH]C=N2)[C]1=O	0.94	0.14	2.14	2	0	0 0	0	-0.034	10	4.527	0	2	0.29	3	1	13	0.86	6	1	-0.79	-0.89	-0.77	180.17	0	7.82	0	0	11	2	72.68	THEOPHYLLINE ANHYDROUS	1982	-0.02	-0.03	-1.04	-0.22	180.2	1	6	72.7	0	7	2	0.29	2
CN(C)CCOC(C1=CC=CC=C1)C2=CC=CC=C2	6.58	5.14	7.14	2	0	0 0	0	3.452	0	8.041	0	5	0.29	1	0	19	0.12	2	0	1.31	2.17	3.65	255.36	0	14	8.87	1	12	7	12.47	DIPHENHYDRAMINE HYDROCHLORIDE	1982	3.27	3.45	3.35	3.5	255.4	0	2	12.5	6	17	5	0.29	2
CC1=NN=C2CN=C(C3=CC=CC=C3Cl)C4=C(C=CC(=C4)Cl)[N]12	5.31	6.01	9.01	3	0	0 0	0	2.618	41	9.331	0	2	0.12	3	0	23	0.24	4	0	3.62	3.63	3.63	343.21	0	14	4.26	0	19	4	43.07	TRIAZOLAM	1982	2.42	2.62	4.23	2.6	343.2	0	4	43.1	1	17	2	0.12	3
CN1C(CCl)NC2=CC(=C(C=C2[S]1(=O)=O)[S](N)(=O)=O)Cl	1.91	3.38	4.38	1	0	1 0	1	0.937	0	7.737	0	3	0.33	4	2	20	1	7	2	0.53	0.52	0.53	360.22	0	9.29	0	0	10	8	109.57	METHYCLOTHIAZIDE	1982	0.92	0.94	0.6	1.3	360.2	2	7	109.6	2	9	3	0.33	1
CN1CC(C=C2[C@H]1CC3=C[NH]C4=CC=CC2=C34)C(=O)N[C@]5(C)O[C@@]6(O)[C@@H]7CCCN7C(=O)C(CC8=CC=CC=C8)N6C5=O	4.83	3.99	6.99	3	0	6 0	6	4.661	0	16.105	0	14	0.42	5	3	43	0.3	10	3	1.4	2.17	2.6	581.67	0	9.7	7.78	1	23	20	118.21	ERGOTAMINE TARTRATE	1982	2.99	4.66	1.99	3.6	581.7	3	10	118.2	5	33	14	0.42	3
CC(=O)NO	-1.25	-1.6	-1.6	0	0	0 0	0	-1.594	0	1.662	0	1	0.5	2	1	5	1.5	3	2	-1.04	-1.05	-1.03	75.07	1	8.94	0	0	2	3	49.33	ACETOHYDROXAMIC ACID	1983	-0.96	-1.59	-0.49	-1.4	75.1	2	3	49.3	1	2	1	0.5	0
CCCC(C)C1(CC=C)C(=O)NC(=O)NC1=O	3.84	3.93	3.93	0	0	1 0	1	2.157	0	6.385	0	7	0.58	3	2	17	0.42	5	2	1.99	1.77	2.03	238.29	0	7.48	0	0	8	9	75.27	SECOBARBITAL SODIUM	1983	2.14	2.16	1.35	2.1	238.3	2	5	75.3	5	12	7	0.58	0
CC1=CC(=NO1)N[S](=O)(=O)C2=CC=C(N)C=C2	1.61	1.39	3.39	2	0	0 0	0	0.563	0	6.276	0	1	0.1	3	1	17	0.7	6	2	0.38	0	0.79	253.28	1	6.16	1.97	0	13	3	98.22	SULFAMETHOXAZOLE	1983	0.89	0.56	1.37	1.1	253.3	2	6	98.2	3	10	1	0.1	2
CC(C)NCC(O)COC1=CC=CC2=CC=CC=C12	5.58	2.92	4.92	2	0	1 0	1	2.753	0	7.834	0	6	0.38	1	2	19	0.19	3	2	-0.32	0.36	2.58	259.35	0	14	9.67	1	10	9	41.49	PROPRANOLOL HYDROCHLORIDE	1983	2.98	2.75	2.58	2.7	259.3	2	3	41.5	6	16	6	0.38	2
COC1=C2O[C@H]3C(=O)CC[C@H]4[C@H]5CC(=C2[C@@]34CCN5C)C=C1	4.24	2.04	3.04	1	0	4 0	4	1.126	0	8.255	0	11	0.61	1	0	22	0.22	4	0	-0.13	0.73	1.96	299.37	0	14	8.61	1	8	14	38.77	HYDROCODONE BITARTRATE	1983	1.68	1.13	1.93	1.7	299.4	0	4	38.8	1	18	11	0.61	1
C[C@]1(O)CC[C@H]2[C@@H]3CCC4=CC(=O)CC[C@]4(C)[C@@]3(F)C(O)C[C@]12C	5.47	3.27	3.27	0	0	7 0	7	2.844	10	9.152	0	17	0.85	3	2	24	0.15	3	2	2.38	2.38	2.38	336.45	0	13.65	0	0	4	20	57.53	FLUOXYMESTERONE	1983	2.38	2.65	3.33	2.4	336.4	2	3	57.5	0	20	17	0.85	0
CSC1=CC2=C(SC3=CC=CC=C3N2CCC4CCCCN4C)C=C1	8.51	5.12	7.12	2	0	1 0	1	6.203	0	11.369	0	9	0.43	0	0	25	0.19	2	0	3.07	3.93	5.47	370.57	0	14	8.93	1	12	13	6.48	THIORIDAZINE HYDROCHLORIDE	1983	5.9	6	5.89	6	370.6	0	2	6.5	4	21	9	0.43	2
CCC1NC(=O)C(C(O)C(C)CC=CC)N(C)C(=O)C(C(C)C)N(C)C(=O)C(CC(C)C)N(C)C(=O)C(CC(C)C)N(C)C(=O)C(C)NC(=O)C(C)NC(=O)C(CC(C)C)N(C)C(=O)C(NC(=O)C(CC(C)C)N(C)C(=O)CN(C)C1=O)C(C)C				0	0	12 1	13	14.36	51	33.332	0	49	0.79	12	5	85	0.37	23	5	3.64	3.64	3.64	1202.63	0	11.83	0	0	24	61	278.8	CYCLOSPORINE	1983	3.11	14.36	3.27	0	1203	5	23	278.8	15	62	49	0.79	0
CC(C)CC1=CC=C(C=C1)C(C)C(O)=O	5.84	2.12	3.12	1	0	1 0	1	3.679	0	6.124	0	6	0.46	2	0	15	0.15	2	1	2.19	1.34	3.84	206.28	1	4.85	0	0	8	7	37.3	IBUPROFEN	1984	3.5	3.68	3.07	3.2	206.3	1	2	37.3	4	13	6	0.46	1
C[C@](N)(CC1=CC=C(O)C(=C1)O)C(O)=O	-0.86	-1.49	-0.49	1	0	1 0	1	-2.264	30	5.407	0	3	0.3	4	3	15	0.5	5	4	-1.36	-1.37	-1.36	211.22	1	1.73	9.85	1	8	7	103.78	METHYLDOPA	1984	-2.33	-2.26	0.44	0.66	211.2	4	5	103.8	3	10	3	0.3	1
COCCC1=CC=C(OCC(O)CNC(C)C)C=C1	4.46	1.3	2.3	1	0	1 0	1	1.486	0	7.691	0	9	0.6	2	2	19	0.27	4	2	-1.14	-0.47	1.76	267.37	0	14	9.67	1	6	13	50.72	METOPROLOL TARTRATE	1984	1.88	1.49	1.61	1.9	267.4	2	4	50.7	9	15	9	0.6	1
CCCNC(=O)N[S](=O)(=O)C1=CC=C(Cl)C=C1	3.83	1.49	2.49	1	0	0 0	0	2.35	0	6.681	0	3	0.3	3	2	17	0.6	5	2	1	1	1.94	276.74	1	3.33	0	0	10	6	75.27	CHLORPROPAMIDE	1984	2.27	2.35	1.74	2.1	276.7	2	5	75.3	6	10	3	0.3	1
CC(CCC1=CC=CC=C1)NCC(O)C2=CC(=C(O)C=C2)C(N)=O	4.35	1.67	3.67	2	0	2 0	2	2.5	0	9.526	0	6	0.32	3	4	24	0.26	5	4	0.5	1.26	1.89	328.41	0	8.05	9.8	1	14	10	95.58	LABETALOL HYDROCHLORIDE	1984	3.09	2.5	2.14	1.8	328.4	4	5	95.6	8	19	6	0.32	2
CCCC(=O)NC1=CC(=C(OCC(O)CNC(C)C)C=C1)C(C)=O	3.87	1.12	2.12	1	0	1 0	1	1.71	0	9.369	0	10	0.56	3	3	24	0.33	6	3	-1.31	-0.6	1.53	336.43	0	14	9.57	1	10	14	87.66	ACEBUTOLOL HYDROCHLORIDE	1984	1.71	1.71	2.37	1.6	336.4	3	6	87.7	11	18	10	0.56	1
COC1=CC2=C(C=C1)[N](C(=C2CC(O)=O)C)C(=O)C3=CC=C(Cl)C=C3	5.58	2.86	5.86	3	0	0 0	0	4.18	10	9.505	0	3	0.16	3	0	25	0.26	5	1	0.88	0.26	3.53	357.79	1	3.79	0	0	19	6	68.53	INDOMETHACIN	1984	4.27	4.18	3.93	3.4	357.8	1	5	68.5	5	19	3	0.16	3
CC1=CN=C(C=N1)C(=O)NCCC2=CC=C(C=C2)[S](=O)(=O)NC(=O)NC3CCCCC3	3.52	2.43	4.43	2	0	0 0	0	2.571	0	11.752	0	9	0.43	6	3	31	0.48	9	3	0.51	0.49	1.43	445.54	1	4.32	0.06	0	18	12	130.15	GLIPIZIDE	1984	1.91	2.57	2.08	2.1	445.5	3	9	130.1	10	21	9	0.43	2
COC1=C(OC)C=C(CCN(C)CCCC(C#N)(C(C)C)C2=CC(=C(OC)C=C2)OC)C=C1	6.85	4.07	6.07	2	0	1 0	1	4.466	0	13.152	0	14	0.52	1	0	33	0.22	6	0	2.03	2.79	5.04	454.61	0	14	9.68	1	12	19	63.95	VERAPAMIL HYDROCHLORIDE	1984	3.79	4.47	5.09	4.5	454.6	0	6	64	14	27	14	0.52	2
COC1=C(C=C(Cl)C=C1)C(=O)NCCC2=CC=C(C=C2)[S](=O)(=O)NC(=O)NC3CCCCC3	5.19	4.42	6.42	2	0	0 0	0	4.239	0	12.819	0	9	0.39	4	3	33	0.39	8	3	2.87	2.85	3.79	494	1	4.32	0	0	18	14	113.6	GLYBURIDE	1984	3.54	4.24	3.64	4.1	494	3	8	113.6	11	23	9	0.39	2
CC1OC(=O)CC(O)CC(O)CC(O)CCC(O)C(O)CC(=O)CC(O)C(C(O)CC(OC2OC(C)C(O)C(N)C2O)C=CC=CC=CC=CCCC=CC=CC(C)C(O)C1C)C(O)=O	0.48	3.16	3.16	0	0	18 6	24	-1.295	0	24.088	0	32	0.68	16	11	65	0.38	18	12	-2.67	-2.67	-2.67	926.11	1	3.62	9.11	1	18	47	327.45	NYSTATIN	1984	-1	-1.95	0.78	1.6	926.1	12	18	327.4	3	47	32	0.68	0
NCCNCCNCCN	0.64	-1.14	-1.14	0	0	0 0	0	-2.369	0	4.435	0	6	1	0	4	10	0.67	4	4	-8.05	-6.3	-2.15	146.24	0	14	9.77	1	0	10	76.1	TRIENTINE HYDROCHLORIDE	1985	-1.53	-2.37	-1.92	-2.9	146.2	4	4	76.1	7	6	6	1	0
C[N+](C)(C)CC(O)CC(O)=O	-1.04	-0.95	-0.95	0	1	1 0	1	-4.767	30	4.223	0	6	0.86	3	1	11	0.57	4	2	-4.12	-4.12	-4.89	162.21	1	4.2	0	1	2	9	57.53	LEVOCARNITINE	1985	-0.35	-4.77	-0.47	-4.6	162.2	2	4	57.5	4	7	6	0.86	0
CNNCC1=CC=C(C=C1)C(=O)NC(C)C	2.35	1.73	2.73	1	0	0 0	0	-0.083	0	6.613	0	5	0.42	3	3	16	0.33	4	3	0.94	0.98	0.99	221.3	0	14	5.56	0	8	8	53.16	PROCARBAZINE HYDROCHLORIDE	1985	0.06	-0.08	1.05	-0.01	221.3	3	4	53.2	6	12	5	0.42	1
C[S](=O)(=O)OCCCCO[S](C)(=O)=O	1.76	0.77	0.77	0	0	0 0	0	-0.592	0	5.011	42	6	1	4	0	14	1.33	6	0	-0.76	-0.76	-0.76	246.29	0	14	0	0	4	8	86.74	BUSULFAN	1985	-0.31	-0.59	-0.28	-0.72	246.3	0	6	86.7	7	6	6	1	0
COC1=CC2=C(C[C@H]3[C@H]4CCCC[C@@]24CCN3C)C=C1	6.97	3.87	4.87	1	0	3 0	3	3.945	0	8.244	0	12	0.67	0	0	20	0.11	2	0	0.38	1.08	3.49	271.4	0	14	9.85	1	6	14	12.47	DEXTROMETHORPHAN HYDROBROMIDE	1985	3	3.95	3.38	3.5	271.4	0	2	12.5	1	18	12	0.67	1
CCN(CC)CCNC(=O)C1=CC(=C(N)C=C1OC)Cl	4.35	1.44	2.44	1	0	0 0	0	2.229	0	8.185	0	7	0.5	1	2	20	0.36	5	2	-1.1	-0.25	1.4	299.8	0	14	9.04	1	8	12	67.59	METOCLOPRAMIDE HYDROCHLORIDE	1985	2.35	2.23	2	1.9	299.8	2	5	67.6	8	14	7	0.5	1
OC(=O)CCCC1=CC=C(C=C1)N(CCCl)CCCl	5.72	3.23	4.23	1	0	0 0	0	3.631	0	7.939	0	7	0.5	2	0	19	0.21	3	1	1.9	1.09	3.94	304.21	1	4.46	1.72	0	8	11	40.54	CHLORAMBUCIL	1985	3.21	3.63	3.38	3.8	304.2	1	3	40.5	9	14	7	0.5	1
CCOC(=O)C(CCC1=CC=CC=C1)NC(C)C(=O)N2CCCC2C(O)=O	3.33	1.95	2.95	1	0	3 0	3	0.667	30	10.155	0	11	0.55	4	1	27	0.35	7	2	-0.48	-1.06	0.59	376.45	1	3.67	5.2	1	12	15	95.94	ENALAPRIL MALEATE	1985	0.11	0.67	1.61	2.2	376.4	2	7	95.9	11	20	11	0.55	1
CCN(CC)CCN1C(=O)CN=C(C2=CC=CC=C2F)C3=C1C=CC(=C3)Cl	6.46	4.35	6.35	2	0	0 0	0	4.215	0	10.82	0	7	0.33	2	0	27	0.19	4	0	1.76	2.62	3.95	387.88	0	14	8.71	1	16	11	35.91	FLURAZEPAM HYDROCHLORIDE	1985	3.54	4.22	4.01	3.8	387.9	0	4	35.9	6	21	7	0.33	2
CC[P+](CC)(CC)[Au-]SC1OC(COC(C)=O)C(OC(C)=O)C(OC(C)=O)C1OC(C)=O				0	0	5 0	5	3.791	59	12.025	61	16	0.8	5	0	32	0.5	9	0	-1.02	-1.02	-1.02	678.48	0	14	0	0	8	24	114.43	AURANOFIN	1985	2.82	3.79	2.79	0	678.5	0	9	114.4	15	20	16	0.8	0
COC1=C2O[C](=O)C=CC2=CC3=C1OC=C3	4.35	4.16	7.16	3	0	0 0	0	2.305	0	5.682	0	1	0.08	1	0	16	0.33	4	0	1.78	1.78	1.78	216.19	0	14	0	0	14	2	52.58	METHOXSALEN	1986	2	2.31	2.55	2.1	216.2	0	4	52.6	1	12	1	0.08	3
NC(N)=NC(=O)C1=C(N)N=C(N)C(=N1)Cl	-1.84	0.07	1.07	1	0	0 0	0	-2.222	59	5.539	0	0	0	3	4	15	1.33	8	4	-0.89	-0.89	-0.89	229.63	0	14	1.92	1	10	5	159.29	AMILORIDE HYDROCHLORIDE ANHYDROUS	1986	-1.07	-2.22	-1.29	-0.56	229.6	4	8	159.3	2	6	0	0	1
ClC1=C(NC2=NCCN2)C(=CC=C1)Cl	3.74	3.34	4.34	1	0	0 0	0	1.727	20	5.814	0	2	0.22	0	2	14	0.33	3	2	0.88	1.66	2.49	230.09	0	14	8.16	1	8	6	36.42	CLONIDINE HYDROCHLORIDE	1986	2.07	1.73	2.37	2	230.1	2	3	36.4	2	9	2	0.22	1
NC(=N)NC(=O)CC1=C(Cl)C=CC=C1Cl	3.27	2.35	3.35	1	0	0 0	0	1.37	30	6.027	0	1	0.11	1	3	15	0.44	4	3	-0.02	0.73	1.5	246.09	0	8.21	10.07	1	10	5	78.97	GUANFACINE HYDROCHLORIDE	1986	2.02	1.37	1.55	1.3	246.1	3	4	79	4	9	1	0.11	1
CN(C)CC\C=C1\C2=CC=CC=C2COC3=CC=CC=C13	6.84	4.87	6.87	2	0	0 1	1	4.092	41	8.841	0	5	0.26	0	0	21	0.11	2	0	0.78	1.51	3.84	279.38	0	14	9.76	1	14	7	12.47	DOXEPIN HYDROCHLORIDE	1986	4.1	4.09	3.96	4.2	279.4	0	2	12.5	3	19	5	0.26	2
CC1=C(Cl)C(=C(Cl)C=C1)NC2=CC=CC=C2C(O)=O	7.21	3.44	5.44	2	0	0 0	0	6.256	0	7.668	0	1	0.07	2	1	19	0.21	3	2	3.44	2.82	6.09	296.15	1	3.79	0	0	14	5	49.33	MECLOFENAMATE SODIUM	1986	5.73	6.41	4.74	4.8	296.2	2	3	49.3	3	14	1	0.07	2
CN1C(=O)C(O)N=C(C2=CC=CC=C2)C3=C1C=CC(=C3)Cl	4.87	5.01	7.01	2	0	1 0	1	2.34	0	8.27	0	2	0.13	3	1	21	0.25	4	1	2.79	2.79	2.79	300.74	0	10.68	0	0	16	5	52.9	TEMAZEPAM	1986	2.19	2.34	2.47	2.2	300.7	1	4	52.9	1	16	2	0.13	2
COC1=C2O[C@H]3C(=O)CC[C@@]4(O)[C@H]5CC(=C2[C@@]34CCN5C)C=C1	2.96	0.57	1.57	1	0	4 0	4	-0.039	0	8.408	0	11	0.61	2	1	23	0.28	5	1	-0.68	0.16	1.03	315.37	0	13.57	8.21	1	8	15	59	OXYCODONE HYDROCHLORIDE	1986	1.12	-0.04	1.05	0.72	315.4	1	5	59	1	18	11	0.61	1
CCCCC(C)(O)CC=CC1C(O)CC(=O)C1CCCCCCC(=O)OC	5.86	5.26	5.26	0	0	4 1	5	3.072	0	10.709	0	18	0.82	4	2	27	0.23	5	2	3.86	3.86	3.86	382.54	0	14	0	0	6	21	83.83	MISOPROSTOL	1986	4.33	3.07	3.95	4.5	382.5	2	5	83.8	14	22	18	0.82	0
ClC1=CC=C(NC(=N)NC(=N)NCCCCCCNC(=N)NC(=N)NC2=CC=C(Cl)C=C2)C=C1	5.03	2.64	4.64	2	0	0 0	0	4.81	0	13.798	0	6	0.27	2	10	34	0.45	10	10	-3.08	-1.3	4.51	505.45	0	14	10.52	2	20	14	167.58	CHLORHEXIDINE GLUCONATE	1986	2.29	4.81	4.18	4.8	505.4	10	10	167.6	17	22	6	0.27	2
NC12CC3CC(CC(C3)C1)C2	5.14	0.19	0.19	0	0	0 0	0	1.995	0	4.652	0	10	1	0	1	11	0.1	1	1	-1.54	-1.38	1.47	151.25	0	14	10.71	1	0	11	26.02	AMANTADINE HYDROCHLORIDE	1987	2.44	2	1.91	2.5	151.2	1	1	26	0	10	10	1	0
CN1CC[C@@]23[C@H]4OC5=C(O)C=CC(=C25)C[C@@H]1[C@@H]3C=CC4O	3.18	0.47	1.47	1	0	5 0	5	0.572	0	7.883	0	9	0.53	2	2	21	0.24	4	2	-1.44	-0.6	0.9	285.34	0	10.26	9.12	1	8	13	52.93	MORPHINE SULFATE	1987	1.1	0.57	1.2	1.1	285.3	2	4	52.9	0	17	9	0.53	1
OC(CCN1CCCCC1)(C2CCCCC2)C3=CC=CC=C3	7.75	4.41	5.41	1	0	1 0	1	5.151	0	9.349	0	14	0.7	1	1	22	0.1	2	1	1.49	2.32	4.23	301.47	0	13.84	9.32	1	6	16	23.47	TRIHEXYPHENIDYL HYDROCHLORIDE	1987	4.26	5.15	4.33	4.6	301.5	1	2	23.5	5	20	14	0.7	1
CNCCC(OC1=CC=C(C=C1)C(F)(F)F)C2=CC=CC=C2	7.48	4.88	6.88	2	0	1 0	1	4.566	41	8.087	0	5	0.29	0	1	22	0.12	2	1	1.2	1.83	4.17	309.33	0	14	9.8	1	12	10	21.26	FLUOXETINE HYDROCHLORIDE	1987	4.26	4.57	4.44	4.3	309.3	1	2	21.3	7	17	5	0.29	2
OC(=O)C1=C[N](C2CC2)C3=CC(=C(F)C=C3[C]1=O)N4CCNCC4	1.7	0.84	2.84	2	0	0 0	0	-0.725	0	8.716	0	7	0.41	3	1	24	0.35	6	2	-0.85	-0.81	-0.81	331.35	1	5.76	8.68	1	13	11	74.57	CIPROFLOXACIN HYDROCHLORIDE	1987	-1.08	-0.73	1.58	1.8	331.3	2	6	74.6	3	17	7	0.41	2
NC(N)=NC1=NC(=CS1)CSCCC(N)=N[S](N)(=O)=O	0.08	1.71	2.71	1	0	0 1	1	-0.581	20	8.142	0	3	0.38	3	4	20	1.5	9	4	-3.21	-2.67	-1.95	337.44	0	9.29	8.38	2	11	8	175.83	FAMOTIDINE	1987	0.06	-0.58	-0.77	-0.63	337.4	4	9	175.8	7	8	3	0.38	1
ClC1=CC=CC(=C1)N2CCN(CCC[N]3N=C4C=CC=C[N]4[C]3=O)CC2	5.8	3.04	6.04	3	0	0 0	0	3.85	40	10.406	0	7	0.37	2	0	26	0.32	6	0	2.44	2.96	3.13	371.87	0	14	7.09	1	16	10	45.78	TRAZODONE HYDROCHLORIDE	1987	2.74	3.85	2.36	4.5	371.9	0	6	45.8	5	19	7	0.37	3
C[C@H](CCC(O)=O)[C@H]1CC[C@H]2[C@@H]3[C@@H](O)C[C@@H]4C[C@H](O)CC[C@]4(C)[C@H]3CC[C@]12C	6.29	2.91	2.91	0	0	10 0	10	4.514	0	11.094	0	23	0.96	4	2	28	0.17	4	3	1.81	0.98	3.71	392.58	1	4.6	0	0	2	26	77.76	URSODIOL	1987	4.22	4.51	4.48	4.4	392.6	3	4	77.8	4	24	23	0.96	0
NCCCCC(NC(CCC1=CC=CC=C1)C(O)=O)C(=O)N2CCCC2C(O)=O	0.67	0.15	1.15	1	0	3 0	3	-1.822	30	10.988	0	12	0.57	5	2	29	0.38	8	4	-3.11	-3.18	-3.1	405.5	2	3.17	10.21	2	12	17	132.96	LISINOPRIL	1987	-3.01	-1.82	1.24	0.66	405.5	4	8	133	13	21	12	0.57	1
OCCN1CCN(CCCN2C3=CC=CC=C3SC4=C2C=C(C=C4)C(F)(F)F)CC1	6.77	5.04	7.04	2	0	0 0	0	4.318	0	11.595	0	10	0.45	1	1	30	0.23	4	1	2.64	3.41	3.97	437.53	0	14	7.81	1	12	18	29.95	FLUPHENAZINE HYDROCHLORIDE	1987	4.36	4.12	4.31	4.5	437.5	1	4	30	7	22	10	0.45	2
CN1CCN(CC\C=C2\C3=CC=CC=C3SC4=C2C=C(C=C4)[S](=O)(=O)N(C)C)CC1	5.74	5.64	7.64	2	0	0 1	1	3.228	0	12.782	0	9	0.39	2	0	30	0.3	5	0	1.7	2.54	3.36	443.62	0	14	8.16	1	16	13	43.86	THIOTHIXENE	1987	2.97	3.23	3.47	4	443.6	0	5	43.9	5	23	9	0.39	2
CC(S)C(O)=NCC(O)=O	1.04	-0.69	-0.69	0	0	1 1	2	0.016	59	3.836	0	3	0.6	4	2	10	1	4	2	-3.83	-5.35	0.29	163.19	1	3.84	1.32	0	4	6	69.89	TIOPRONIN	1988	0.19	0.02	0.35	1.1	163.2	2	4	69.9	3	5	3	0.6	0
ClC1=CC2=C(O[C](=O)[NH]2)C=C1	3.4	2.11	4.11	2	0	0 0	0	1.871	0	4.084	0	0	0	1	1	11	0.43	3	1	1.94	1.93	1.94	169.56	0	9.39	0	0	10	1	46	CHLORZOXAZONE	1988	1.85	1.87	1.78	1.7	169.6	1	3	46	0	7	0	0	2
NC1=CC(=NC(=[N]1=O)N)N2CCCCC2	1.58	0.97	1.97	1	0	0 0	0	0.021	0	5.781	0	5	0.56	2	2	15	0.67	6	2	1.3	1.3	1.3	209.25	0	14	4.34	0	7	8	93.63	MINOXIDIL	1988	1.24	0.02	-0.13	0.9	209.2	2	6	93.6	1	9	5	0.56	1
CC(C)NCC(O)C1=CC(=CC(=C1)O)O	1.66	-1.31	-0.31	1	0	1 0	1	0.083	0	5.836	0	5	0.45	3	4	15	0.36	4	4	-1.68	-0.94	0.21	211.26	0	8.84	9.7	1	6	9	72.72	METAPROTERENOL SULFATE	1988	0.52	0.08	1.13	0.56	211.3	4	4	72.7	4	11	5	0.45	1
NCC(CC(O)=O)C1=CC=C(Cl)C=C1	1.82	-0.65	0.35	1	0	1 0	1	-0.62	0	5.593	0	3	0.3	2	1	14	0.3	3	2	-0.78	-0.78	-0.78	213.66	1	3.89	9.79	1	8	6	63.32	BACLOFEN	1988	-0.96	-0.62	1.86	1.4	213.7	2	3	63.3	4	10	3	0.3	1
NC1=NC(=C2N=C(C3=CC=CC=C3)C(=NC2=N1)N)N	2.05	0.63	3.63	3	0	0 0	0	1.608	0	7.149	0	0	0	4	3	19	0.58	7	3	1.11	1.11	1.11	253.27	0	14	1.86	0	16	3	129.62	TRIAMTERENE	1988	0.98	1.61	0.83	1.1	253.3	3	7	129.6	1	12	0	0	3
CN(C)CCC=C1C2=CC=CC=C2C=CC3=CC=CC=C13	7.83	6.38	8.38	2	0	0 0	0	5.097	0	9.127	0	4	0.2	0	0	21	0.05	1	0	1.55	2.28	4.61	275.39	0	14	9.76	1	16	5	3.24	CYCLOBENZAPRINE HYDROCHLORIDE	1988	4.48	5.1	4.55	5.1	275.4	0	1	3.2	3	20	4	0.2	2
CNCCCC12CCC(C3=CC=CC=C13)C4=CC=CC=C24	7.5	4.94	6.94	2	0	0 0	0	4.524	0	8.924	0	8	0.4	0	1	21	0.05	1	1	1.19	1.48	4.37	277.41	0	14	10.54	1	12	9	12.03	MAPROTILINE HYDROCHLORIDE	1988	5.16	4.52	4.21	4.1	277.4	1	1	12	4	20	8	0.4	2
OC1N=C(C2=CC=CC=C2)C3=C(NC1=O)C=CC(=C3)Cl	4.06	3.96	5.96	2	0	1 0	1	2.305	0	7.806	0	1	0.07	3	2	20	0.27	4	2	2.92	2.92	2.92	286.72	0	10.61	0	0	16	4	61.69	OXAZEPAM	1988	2.24	2.31	2.45	2.3	286.7	2	4	61.7	1	15	1	0.07	2
OC1N=C(C2=CC=CC=C2Cl)C3=C(NC1=O)C=CC(=C3)Cl	4.2	4.76	6.76	2	0	1 0	1	2.368	0	8.297	0	1	0.07	3	2	21	0.27	4	2	3.53	3.53	3.53	321.16	0	10.61	0	0	16	5	61.69	LORAZEPAM	1988	2.59	2.37	3.1	2.9	321.2	2	4	61.7	1	15	1	0.07	2
CN1CCN(CC1)C2=NC3=CC=CC=C3OC4=C2C=C(Cl)C=C4	5.76	5.39	7.39	2	0	0 0	0	3.981	30	9.201	0	5	0.28	1	0	23	0.22	4	0	2.7	3.26	3.46	327.81	0	14	7.18	1	14	9	28.07	LOXAPINE SUCCINATE	1988	3.11	3.98	3.77	4.2	327.8	0	4	28.1	1	18	5	0.28	2
CC1(C)S[C@@H]2C(NC(=O)C(N)C3=CC=CC=C3)C(=O)N2C1C(O)=O	0.91	-0.07	0.93	1	0	4 0	4	-1.204	41	9.144	0	7	0.44	4	2	24	0.5	7	3	-2.07	-2.36	-2	349.41	1	3.24	7.23	1	12	12	112.73	AMPICILLIN TRIHYDRATE	1988	-1.42	-1.2	0.32	0.85	349.4	3	7	112.7	5	16	7	0.44	1
OC1(CCN(CCCC(=O)C2=CC=C(F)C=C2)CC1)C3=CC=C(Cl)C=C3	6.21	4.62	6.62	2	0	0 0	0	3.849	0	10.261	0	8	0.38	2	1	26	0.14	3	1	2.11	2.93	3.66	375.87	0	13.96	8.05	1	14	12	40.54	HALOPERIDOL LACTATE	1988	3.46	3.85	4.43	4.3	375.9	1	3	40.5	6	21	8	0.38	2
CC(=O)O[C@@]1(CC[C@H]2[C@@H]3C=C(C)C4=CC(=O)CC[C@]4(C)[C@H]3CC[C@]12C)C(C)=O	6.64	6.45	6.45	0	0	6 0	6	3.772	10	10.656	40	17	0.71	3	0	28	0.17	4	0	3.72	3.72	3.72	384.52	0	14	0	0	10	18	60.44	MEGESTROL ACETATE	1988	3.37	3.58	4.58	3	384.5	0	4	60.4	3	24	17	0.71	0
OCCN1CCN(CCCN2C3=CC=CC=C3SC4=C2C=C(Cl)C=C4)CC1	6.3	5.12	7.12	2	0	0 0	0	4.007	0	11.576	0	9	0.43	1	1	27	0.24	4	1	2.36	3.14	3.69	403.97	0	14	7.81	1	12	15	29.95	PERPHENAZINE	1988	4.2	3.81	3.94	4.3	404	1	4	30	6	21	9	0.43	2
CN(C)C1[C@@H]2C[C@H]3C(=C(O)[C@]2(O)C(=O)C(=C1O)C(N)=O)C(=O)C4=C(O)C=CC=C4[C@@]3(C)O	0.33	3.47	4.47	1	0	5 0	5	-0.896	10	11.288	0	9	0.41	8	6	32	0.45	10	6	-3.5	-3.7	-3.47	444.44	0	2.91	8.19	1	16	16	181.62	TETRACYCLINE HYDROCHLORIDE	1988	-1.47	-0.91	-0.21	-0.87	444.4	6	10	181.6	2	22	9	0.41	1
CC(C)(C)NCC(O)C1=CC(=C(O)C=C1)CO	2.07	-1.02	-0.02	1	0	1 0	1	0.061	0	6.763	0	7	0.54	3	4	17	0.31	4	4	-2.01	-1.32	0.34	239.31	0	10.12	9.4	1	6	11	72.72	ALBUTEROL SULFATE	1989	0.51	0.06	1.31	0.63	239.3	4	4	72.7	5	13	7	0.54	1
CCCCNC(=O)N[S](=O)(=O)C1=CC=C(C)C=C1	4.13	2.27	3.27	1	0	0 0	0	2.497	0	7.117	0	5	0.42	3	2	18	0.5	5	2	1.37	1.36	2.3	270.35	1	4.33	0	0	10	7	75.27	TOLBUTAMIDE	1989	2.15	2.5	1.78	2.3	270.3	2	5	75.3	7	12	5	0.42	1
CN\C(NCCSCC1=CC=C(CN(C)C)O1)=C/[N](=O)=O	3.01	0.24	1.24	1	0	0 1	1	0.67	20	8.651	0	7	0.54	1	2	21	0.62	7	2	-0.33	0.44	0.98	314.4	0	14	7.8	1	9	11	86.26	RANITIDINE HYDROCHLORIDE	1989	1.52	0.67	1.46	0.33	314.4	2	7	86.3	10	13	7	0.54	1
CN1CCN(CC1)C2=NC3=CC(=CC=C3NC4=CC=CC=C24)Cl	5.01	4.37	6.37	2	0	0 0	0	3.564	30	9.417	0	5	0.28	0	1	23	0.22	4	1	2.49	3.12	3.4	326.83	0	14	7.35	1	14	9	30.87	CLOZAPINE	1989	2.85	3.71	3.72	4.5	326.8	1	4	30.9	1	18	5	0.28	2
COC1=C(OC)C=C2C(=NC(=NC2=C1)N3CCN(CC3)C(=O)C4=CC=CO4)N	3.49	2.59	5.59	3	0	0 0	0	2.028	0	10.197	0	6	0.32	3	1	28	0.47	9	1	0.87	1.43	1.65	383.41	0	14	7.24	0	17	11	106.95	PRAZOSIN HYDROCHLORIDE	1989	1.58	2.03	1.79	1.5	383.4	1	9	106.9	5	19	6	0.32	3
CO\N=C(/C(=O)NC1[C@H]2SCC(=C(N2C1=O)C(O)=O)COC(N)=O)C3=CC=CO3	0.5	-0.06	0.94	1	0	2 1	3	0.229	30	10.174	0	5	0.31	7	2	29	0.81	12	3	-4.03	-4.36	-0.9	424.38	1	3.15	0	0	17	12	173.76	CEFUROXIME AXETIL	1989	0.26	0.23	-0.54	-0.19	424.4	3	12	173.8	9	16	5	0.31	1
CC(C[N+](C)(C)C)OC(N)=O	0.47	0.19	0.19	0	1	1 0	1	-4.01	30	4.439	0	6	0.86	1	1	11	0.57	4	1	-4.14	-4.14	-4.14	161.22	0	14	0	1	2	9	52.32	BETHANECHOL CHLORIDE	1990	0.86	-4.01	0.18	-3.9	161.2	1	4	52.3	4	7	6	0.86	0
CN1CCCC1C2=CN=CC=C2	4.09	0.56	1.56	1	0	1 0	1	0.883	0	4.988	0	5	0.5	1	0	12	0.2	2	0	-0.9	-0.04	1.16	162.24	0	14	8.58	1	6	6	16.13	NICOTINE	1990	1.29	0.88	1.85	1.1	162.2	0	2	16.1	1	10	5	0.5	1
CN(C)C1=NC(=NC(=N1)N(C)C)N(C)C	4.25	1.64	2.64	1	0	0 0	0	1.665	0	5.944	0	6	0.67	3	0	15	0.67	6	0	1.02	1.72	2.22	210.28	0	14	7.75	0	6	9	48.39	ALTRETAMINE	1990	2.73	1.66	0.07	2	210.3	0	6	48.4	3	9	6	0.67	1
CC1=N[S](=O)(=O)C2=C(N1)C=CC(=C2)Cl	2.96	0.71	1.71	1	0	0 0	0	1.421	30	5.363	0	1	0.13	3	1	14	0.62	4	1	1	1	1	230.67	0	10.48	1.33	0	10	3	58.53	DIAZOXIDE	1990	0.96	1.42	1.87	1.2	230.7	1	4	58.5	0	8	1	0.13	1
CC(C)NCC(O)COC1=CC=C(CC(N)=O)C=C1	2.28	-0.09	0.91	1	0	1 0	1	-0.109	0	7.478	0	7	0.5	2	3	19	0.36	5	3	-2.48	-1.8	0.43	266.34	0	14	9.67	1	8	11	84.58	ATENOLOL	1990	0.22	-0.11	0.45	0.35	266.3	3	5	84.6	8	14	7	0.5	1
COC1=CC(=CC(=C1OC)OC)CC2=CN=C(N)N=C2N	2.67	2.01	4.01	2	0	0 0	0	0.981	0	7.829	0	4	0.29	2	2	21	0.5	7	2	0.6	1.1	1.28	290.32	0	14	7.16	0	12	9	105.51	TRIMETHOPRIM	1990	1.52	0.98	1.26	1.1	290.3	2	7	105.5	5	14	4	0.29	2
CC(CN(C)C)CN1C2=CC=CC=C2CCC3=CC=CC=C13	8.06	5.87	7.87	2	0	1 0	1	5.436	0	9.47	0	8	0.4	0	0	22	0.1	2	0	1.94	2.75	4.76	294.44	0	14	9.42	1	12	10	6.48	TRIMIPRAMINE MALEATE	1990	4.65	5.44	4.12	4.6	294.4	0	2	6.5	4	20	8	0.4	2
OC(=O)C1=CC(=CC=C1O)N=NC2=CC=C(O)C(=C2)C(O)=O	3.52	-0.41	1.59	2	0	0 1	1	4.574	0	7.827	0	0	0	8	2	22	0.57	8	4	-1.78	-2.49	4.39	302.24	2	2.93	0	0	18	4	139.78	OLSALAZINE SODIUM	1990	2.61	5.17	2.91	3.2	302.2	4	8	139.8	4	14	0	0	2
OC(C[N]1C=NC=N1)(C[N]2C=NC=N2)C3=C(F)C=C(F)C=C3	1.95	1.7	4.7	3	0	0 0	0	-0.44	0	7.301	0	3	0.23	5	1	22	0.54	7	1	0.56	0.56	0.56	306.28	0	12.68	2.3	0	16	6	81.65	FLUCONAZOLE	1990	1.11	-0.44	0.74	0.19	306.3	1	7	81.7	5	13	3	0.23	3
CC(C)(C)NC[C@H](O)COC1=NSN=C1N2CCOCC2	3.86	1.51	2.51	1	0	1 0	1	1.531	0	8.197	0	11	0.85	4	2	21	0.62	7	2	-1.61	-0.97	1.34	316.42	0	14	9.76	1	5	16	79.74	TIMOLOL MALEATE	1990	1.83	1.21	0.5	1.4	316.4	2	7	79.7	7	13	11	0.85	1
COC1=CC2=C(C=C1)N=C([NH]2)[S](=O)CC3=NC=C(C)C(=C3C)OC	3.91	3.73	6.73	3	0	1 0	1	2.565	41	9.36	0	5	0.29	3	1	24	0.41	6	1	2.43	2.43	2.43	345.42	0	9.29	4.77	0	17	7	77.1	OMEPRAZOLE MAGNESIUM	1990	2.25	2.57	2.9	2.2	345.4	1	6	77.1	5	17	5	0.29	3
CC\1=C(CC(O)=O)C2=CC(=CC=C2C1=C\C3=CC=C(C=C3)[S](C)=O)F	5.1	2.15	4.15	2	0	1 1	2	3.157	0	9.878	0	3	0.15	3	0	25	0.2	3	1	0.55	-0.18	2.93	356.41	1	4.09	0	0	20	5	54.37	SULINDAC	1990	3.05	3.16	4.37	3.1	356.4	1	3	54.4	4	20	3	0.15	2
CCN(CC)CC#CCOC(=O)C(O)(C1CCCCC1)C2=CC=CC=C2	7.37	7.59	8.59	1	0	1 0	1	4.687	0	10.516	0	13	0.59	2	1	26	0.18	4	1	2.19	3.06	4.44	357.49	0	11.53	8.77	1	8	16	49.77	OXYBUTYNIN CHLORIDE	1990	3.48	4.87	3.34	4.3	357.5	1	4	49.8	10	22	13	0.59	1
COC1=C(OC)C=C2C(=NC(=NC2=C1)N3CCN(CC3)C(=O)C4COC5=CC=CC=C5O4)N	4.59	3.84	6.84	3	0	1 0	1	3.532	30	12.039	0	8	0.35	3	1	33	0.43	10	1	1.35	1.91	2.14	451.48	0	12.67	7.24	0	18	15	112.27	DOXAZOSIN MESYLATE	1990	1.9	3.53	1.72	2.6	451.5	1	10	112.3	5	23	8	0.35	3
CN(C)C1[C@@H]2C[C@@H]3CC4=C(C(=CC=C4N(C)C)O)C(=O)C3=C(O)[C@]2(O)C(=O)C(=C1O)C(N)=O	1.7	1.58	2.58	1	0	4 0	4	0.206	10	11.968	0	10	0.43	7	5	33	0.43	10	5	-2.52	-2.61	-2.54	457.48	0	2.9	7.9	1	16	17	164.63	MINOCYCLINE HYDROCHLORIDE	1990	0.42	0.19	0.19	0.36	457.5	5	10	164.6	3	23	10	0.43	1
NC1=NC2=C(N(C=O)C(CNC3=CC=C(C=C3)C(=O)NC(CCC(O)=O)C(O)=O)CN2)[C](=O)[NH]1	-2.01	-0.56	1.44	2	0	2 0	2	-1.452	0	11.744	0	6	0.3	8	5	34	0.7	14	7	-7.2	-8.47	-2.34	473.45	2	3.47	2.81	0	21	13	219.84	LEUCOVORIN CALCIUM	1990	-0.82	-1.45	-0.73	-2	473.4	7	14	219.8	11	20	6	0.3	2
NC[C@H]1O[C@H](O[C@@H]2[C@@H](N)C[C@@H](N)[C@H](O)[C@H]2O[C@@H]3O[C@H](CO)[C@@H](O[C@H]4O[C@@H](CN)[C@@H](O)[C@H](O)[C@H]4N)[C@H]3O)[C@H](N)[C@@H](O)[C@@H]1O	-4.3	1.6	1.6	0	0	19 0	19	-6.466	0	14.338	0	23	1	13	13	42	0.83	19	13	-20.14	-15.47	-8.42	614.65	0	12.29	9.73	6	0	42	353.11	NEOMYCIN SULFATE	1990	-2.57	-6.47	-8.9	-9	614.6	13	19	353.1	9	23	23	1	0
OCC1CCC(O1)[N]2C=NC3=C2[NH]C=N[C]3=O	0.08	0.01	2.01	2	0	2 0	2	-0.849	10	5.834	0	5	0.5	5	2	17	0.7	7	2	-0.48	-0.88	-0.35	236.23	0	6.94	2.75	0	10	7	93.03	DIDANOSINE	1991	-0.61	-1.65	-0.21	-0.79	236.2	2	7	93	2	10	5	0.5	2
CCOC(=O)C1=C(C)NC(=C(C1C2=C(Cl)C(=CC=C2)Cl)C(=O)OC)C	6.71	5.82	6.82	1	0	1 0	1	5.297	20	9.907	0	6	0.33	2	1	25	0.28	5	1	3.44	3.44	3.44	384.25	0	14	0	0	14	11	64.63	FELODIPINE	1991	4.97	5.3	3.96	4.2	384.3	1	5	64.6	6	18	6	0.33	1
CCOC(=O)C(CCC1=CC=CC=C1)NC(C)C(=O)N2[C@H]3CCC[C@H]3CC2C(O)=O	4.19	3.08	4.08	1	0	5 0	5	1.54	30	11.369	0	14	0.61	4	1	30	0.3	7	2	0.42	-0.18	1.47	416.52	1	3.75	5.2	1	12	18	95.94	RAMIPRIL	1991	0.75	1.54	2.38	2.8	416.5	2	7	95.9	11	23	14	0.61	1
CCC(C)(C)C(=O)OC1CC(C)C=C2C=CC(C)C(CCC3CC(O)CC(=O)O3)[C@@H]12	7.28	8.58	8.58	0	0	7 0	7	4.481	0	11.72	0	19	0.76	3	1	30	0.2	5	1	4.46	4.46	4.46	418.57	0	14	0	0	8	22	72.83	SIMVASTATIN	1991	4.68	4.48	4.59	5	418.6	1	5	72.8	7	25	19	0.76	0
CCOC(=O)C(CCC1=CC=CC=C1)NC2CCC3=CC=CC=C3N(CC(O)=O)C2=O	4.46	2.99	4.99	2	0	2 0	2	1.824	0	11.739	0	9	0.38	4	1	31	0.29	7	2	0.59	0.07	1.54	424.5	1	3.53	5.36	1	18	13	95.94	BENAZEPRIL HYDROCHLORIDE	1991	1.28	1.82	2.57	3.6	424.5	2	7	95.9	10	24	9	0.38	2
CCOC(=O)C(CCC1=CC=CC=C1)NC(C)C(=O)N2CC3=CC=CC=C3CC2C(O)=O	4.3	3.25	5.25	2	0	3 0	3	1.736	30	12.203	0	10	0.4	4	1	32	0.28	7	2	0.9	0.31	1.96	438.52	1	3.7	5.2	1	18	14	95.94	QUINAPRIL HYDROCHLORIDE	1991	0.95	1.74	2.57	3.2	438.5	2	7	95.9	11	25	10	0.4	2
CN(C)C(=O)C(CCN1CCC(O)(CC1)C2=CC=C(Cl)C=C2)(C3=CC=CC=C3)C4=CC=CC=C4	7.12	4.32	7.32	3	0	0 0	0	4.662	41	14.053	0	10	0.34	2	1	34	0.14	4	1	1.96	2.77	4.77	477.05	0	13.96	9.41	1	20	14	43.78	LOPERAMIDE HYDROCHLORIDE	1991	3.98	4.66	5.09	4.7	477	1	4	43.8	8	29	10	0.34	3
CN1CC(C[C@H]2[C@H]1CC3=C[NH]C4=CC=CC2=C34)C(=O)N[C@]5(C)O[C@@]6(O)[C@@H]7CCCN7C(=O)C(CC8=CC=CC=C8)N6C5=O	4.99	4.84	7.84	3	0	7 0	7	4.765	0	16.131	0	16	0.48	5	3	43	0.3	10	3	0.98	1.84	2.71	583.69	0	9.71	8.39	1	21	22	118.21	DIHYDROERGOCORNINE MESYLATE	1991	2.98	4.77	2.08	3.8	583.7	3	10	118.2	5	33	16	0.48	3
CCC1OC(=O)C(C)C(O[C@H]2C[C@@](C)(OC)C(O)C(C)O2)C(C)C(O[C@@H]3OC(C)CC(C3O)N(C)C)[C@@](C)(CC(C)C(=O)C(C)C(O)[C@]1(C)O)OC	4.93	4.34	4.34	0	0	18 0	18	2.374	0	19.394	0	36	0.95	12	4	52	0.37	14	4	1.36	2.22	3.24	747.96	0	12.46	8.38	1	4	48	182.91	CLARITHROMYCIN	1991	2.76	2.37	2.44	2.3	748	4	14	182.9	8	38	36	0.95	0
NC1=CC(=C(O)C=C1)C(O)=O	1.25	-1.16	-0.16	1	0	0 0	0	1.056	0	3.863	0	0	0	3	2	11	0.57	4	3	-0.99	-1.72	-0.29	153.14	1	2.02	5.87	0	8	3	83.55	MESALAMINE	1992	1.07	1.06	0.67	0.67	153.1	3	4	83.6	1	7	0	0	1
CC(C)NCC(O)COC1=CC=CC2=C1C=C[NH]2	3.64	1.34	3.34	2	0	1 0	1	1.671	0	7.264	0	6	0.43	1	3	18	0.29	4	3	-1.21	-0.53	1.69	248.33	0	14	9.67	1	9	9	57.28	PINDOLOL	1992	1.75	1.67	1.91	1.8	248.3	3	4	57.3	6	14	6	0.43	2
OC(=O)C1=C(O)C=CC(=C1)C2=C(F)C=C(F)C=C2	5.48	0.92	2.92	2	0	0 0	0	4.397	0	6.036	0	0	0	3	1	18	0.23	3	2	0.56	0.41	3.91	250.2	1	2.69	0	0	14	4	57.53	DIFLUNISAL	1992	3.49	4.4	3.04	3.7	250.2	2	3	57.5	2	13	0	0	2
CNCCC=C1C2=CC=CC=C2CCC3=CC=CC=C13	7.27	3.75	5.75	2	0	0 0	0	4.315	0	8.688	0	5	0.26	0	1	20	0.05	1	1	1.26	1.58	4.43	263.38	0	14	10.47	1	14	6	12.03	NORTRIPTYLINE HYDROCHLORIDE	1992	4.04	4.31	3.83	4.1	263.4	1	1	12	3	19	5	0.26	2
OC(=O)CCC1=NC(=C(O1)C2=CC=CC=C2)C3=CC=CC=C3	5.05	3.41	6.41	3	0	0 0	0	2.948	0	8.294	0	2	0.11	3	0	22	0.22	4	1	1.91	1.05	3.46	293.32	1	4.95	0	0	19	3	63.33	OXAPROZIN	1992	3.98	2.95	4.03	3.7	293.3	1	4	63.3	5	18	2	0.11	3
CNC1CCC(C2=CC(=C(Cl)C=C2)Cl)C3=CC=CC=C13	8.05	5.7	7.7	2	0	2 0	2	5.347	0	8.693	0	5	0.29	0	1	20	0.06	1	1	2.31	3.02	5.15	306.23	0	14	9.56	1	12	8	12.03	SERTRALINE HYDROCHLORIDE	1992	5.6	5.35	5.18	4.7	306.2	1	1	12	2	17	5	0.29	2
ClC1=CC2=C(OC3=CC=CC=C3N=C2N4CCNCC4)C=C1	4.75	3.61	5.61	2	0	0 0	0	3.406	30	8.737	0	4	0.24	1	1	22	0.24	4	1	0.8	1.64	3.08	313.79	0	14	8.83	1	14	8	36.86	AMOXAPINE	1992	2.79	3.41	3.43	3.6	313.8	1	4	36.9	1	17	4	0.24	2
CN1CCCC1CCO[C@](C)(C2=CC=CC=C2)C3=CC=C(Cl)C=C3	8.12	6.1	8.1	2	0	2 0	2	5.447	0	10.21	0	9	0.43	1	0	24	0.1	2	0	2	2.79	4.92	343.9	0	14	9.55	1	12	12	12.47	CLEMASTINE FUMARATE	1992	5.13	5.45	5.1	5.7	343.9	0	2	12.5	6	21	9	0.43	2
CC(C)(C)NC(=O)C1CC[C@H]2[C@@H]3CC[C@H]4NC(=O)C=C[C@]4(C)[C@H]3CC[C@]12C	5.35	6.27	6.27	0	0	7 0	7	3.013	20	10.995	0	19	0.83	2	2	27	0.17	4	2	3.07	3.07	3.07	372.55	0	14	0.16	0	6	21	58.2	FINASTERIDE	1992	3.03	3.01	3.82	3.2	372.5	2	4	58.2	3	23	19	0.83	0
CCOC(=O)C1=C(COCCN)NC(=C(C1C2=CC=CC=C2Cl)C(=O)OC)C	4.83	3.18	4.18	1	0	1 0	1	3.434	20	10.865	0	8	0.4	3	2	28	0.35	7	2	-1.05	-0.37	1.64	408.88	0	14	9.45	1	14	14	99.88	AMLODIPINE BESYLATE	1992	3.3	3.43	2.27	2	408.9	2	7	99.9	10	20	8	0.4	1
COC1=CC=C(C=C1)C2SC3=CC=CC=C3N(CCN(C)C)C(=O)C2OC(C)=O	5.82	5	7	2	0	2 0	2	3.647	30	11.582	0	8	0.36	2	0	29	0.32	6	0	1.05	1.89	2.73	414.52	0	12.86	8.18	1	16	13	59.08	DILTIAZEM HYDROCHLORIDE	1992	2.8	3.65	3.37	3.1	414.5	0	6	59.1	7	22	8	0.36	2
C[C@]12CC[C@H]3[C@@H](CCC4=CC(=CC=C34)OC(=O)N(CCCl)CCCl)[C@@H]1CCC2O	7.39	7.63	8.63	1	0	5 0	5	4.92	0	11.734	0	16	0.7	2	1	29	0.17	4	1	5.1	5.1	5.1	440.41	0	14	0	0	8	21	49.77	ESTRAMUSTINE PHOSPHATE SODIUM	1992	5.23	4.92	5.18	5.2	440.4	1	4	49.8	7	23	16	0.7	1
COC(=O)C1=C(C)NC(=C(C1C2=CC(=CC=C2)[N](=O)=O)C(=O)OCCN(C)CC3=CC=CC=C3)C	6.22	5.34	7.34	2	0	1 0	1	5.23	20	13.343	0	8	0.31	3	1	35	0.35	9	1	1.96	2.78	3.56	479.53	0	14	8.1	1	22	12	113.69	NICARDIPINE HYDROCHLORIDE	1992	4.96	5.23	3.68	3.9	479.5	1	9	113.7	11	26	8	0.31	2
CCC(C)[N]1N=C[N]([C]1=O)C2=CC=C(C=C2)N3CCN(CC3)C4=CC=C(OCC5CO[C@@](C[N]6C=NC=N6)(O5)C7=C(Cl)C=C(Cl)C=C7)C=C4	7.38	6.72	11.72	5	0	3 0	3	5.99	40	18.815	0	13	0.37	6	0	49	0.34	12	0	7.31	7.31	7.31	705.64	0	14	3.91	0	29	20	104.7	ITRACONAZOLE	1992	4.8	5.99	5.58	5.8	705.6	0	12	104.7	11	35	13	0.37	5
CC1OC(CC(O)C1O)OC2C(O)CC(OC2C)OC3C(O)CC(OC3C)OC4CC[C@@]5(C)[C@H](CC[C@@H]6[C@@H]5CC(O)[C@]7(C)C(CC[C@]67O)C8=CC(=O)OC8)C4	3.37	2.63	2.63	0	0	21 0	21	1.423	0	19.851	0	38	0.93	13	6	55	0.34	14	6	2.28	1.92	2.37	780.95	0	7.15	0	0	4	51	203.06	DIGOXIN	1992	1.68	1.42	2.22	0.21	780.9	6	14	203.1	7	41	38	0.93	0
COC1C=CO[C@@]2(C)OC3=C(C2=O)C4=C(C(=C3C)O)C(=O)C(=C5NC6(CCN(CC6)CC(C)C)N=C45)NC(=O)C(=CC=CC(C)C(O)C(C)C(O)C(C)C(OC(C)=O)C1C)C	5.2	4.71	5.71	1	0	9 3	12	4.732	41	22.612	40	27	0.59	9	5	61	0.33	15	5	3.62	3.94	3.88	847.02	0	6.88	7.87	1	24	37	205.55	RIFABUTIN	1992	2.9	4.73	4.62	6.3	847	5	15	205.6	5	46	27	0.59	1
NCC1(CCCCC1)CC(O)=O	1.8	0.12	0.12	0	0	0 0	0	-0.66	0	4.732	0	8	0.89	2	1	12	0.33	3	2	-1.28	-1.27	-1.27	171.24	1	4.63	9.91	1	2	10	63.32	GABAPENTIN	1993	-1.3	-0.66	1.37	0.55	171.2	2	3	63.3	3	9	8	0.89	0
OC1CO[C@@H]2C(CO[C@H]12)O[N+]([O-])=O	-1.17	0.93	0.93	0	0	4 0	4	-2.514	59	3.829	0	6	1	5	1	13	1.17	7	1	-0.71	-0.71	-0.71	191.14	0	13.34	0	0	2	11	91.06	ISOSORBIDE MONONITRATE	1993	0.66	-2.51	-1.28	-0.38	191.1	1	7	91.1	2	6	6	1	0
C[N]1N=C(S[C]1=NC(C)=O)[S](N)(=O)=O	0.97	-0.41	0.59	1	0	0 1	1	0.088	10	5.416	42	2	0.4	5	1	14	1.8	7	1	-0.66	-0.93	-0.59	236.26	0	7.21	0	0	10	3	107.41	METHAZOLAMIDE	1993	0.13	0.09	-1.42	0.13	236.3	1	7	107.4	2	5	2	0.4	1
NC(=O)OCC(COC(N)=O)C1=CC=CC=C1	2.13	1.64	2.64	1	0	0 0	0	0.497	0	6.123	0	3	0.27	2	2	17	0.55	6	2	0.68	0.68	0.68	238.24	0	14	0	0	10	7	104.64	FELBAMATE	1993	1.37	0.5	0.96	0.69	238.2	2	6	104.6	7	11	3	0.27	1
CC1=CC(=C(C)C=C1)OCCCC(C)(C)C(O)=O	6.17	4.37	5.37	1	0	0 0	0	3.937	0	7.205	0	8	0.53	2	0	18	0.2	3	1	2.32	1.51	4.39	250.34	1	4.42	0	0	8	10	46.53	GEMFIBROZIL	1993	3.66	3.94	3.57	3.8	250.3	1	3	46.5	6	15	8	0.53	1
CC(C(O)=O)C1=CC(=CC=C1)C(=O)C2=CC=CC=C2	4.72	1.87	3.87	2	0	1 0	1	2.761	0	7.279	0	2	0.13	3	0	19	0.19	3	1	1.05	0.39	3.61	254.28	1	3.88	0	0	16	3	54.37	KETOPROFEN	1993	3.12	2.76	3.11	2.9	254.3	1	3	54.4	4	16	2	0.13	2
C[N]1C(=CC=C1C(=O)C2=CC=C(C)C=C2)CC(O)=O	3.96	1.94	3.94	2	0	0 0	0	2.206	0	7.173	0	3	0.2	3	0	19	0.27	4	1	0.2	-0.47	2.73	257.29	1	3.93	0	0	15	4	59.3	TOLMETIN SODIUM	1993	2.79	2.21	2.19	2.5	257.3	1	4	59.3	4	15	3	0.2	2
C[N]1C2=C(C(=O)C(CC2)C[N]3C=CN=C3C)C4=CC=CC=C14	5.31	2.59	5.59	3	0	1 0	1	2.716	0	8.641	0	6	0.33	2	0	22	0.22	4	0	1.65	2.11	2.35	293.37	0	14	7.34	0	16	6	39.82	ONDANSETRON HYDROCHLORIDE	1993	3.34	2.72	3.13	2.1	293.4	0	4	39.8	2	18	6	0.33	3
CN(C)C(=O)CC1=C(N=C2C=CC(=C[N]12)C)C3=CC=C(C)C=C3	5.75	4.36	7.36	3	0	0 0	0	3.026	41	9.293	0	5	0.26	2	0	23	0.21	4	0	2.99	3.01	3.02	307.4	0	14	5.39	0	17	6	37.61	ZOLPIDEM TARTRATE	1993	2.97	3.03	3.25	3	307.4	0	4	37.6	4	19	5	0.26	3
CC(C)NCC(O)COC1=CC=C(COCCOC(C)C)C=C1	4.71	1.84	2.84	1	0	1 0	1	1.791	0	9.235	0	12	0.67	3	2	23	0.28	5	2	-0.71	-0.03	2.2	325.45	0	14	9.67	1	6	17	59.95	BISOPROLOL FUMARATE	1993	1.87	1.83	2.37	2.2	325.4	2	5	60	12	18	12	0.67	1
CN1C(=C(O)C2=C(C=CC=C2)[S]1(=O)=O)C(=O)NC3=NC=CC=C3	3.04	1.02	3.02	2	0	0 0	0	1.888	40	8.288	40	1	0.07	5	2	23	0.53	7	2	-0.86	-1.52	0.6	331.35	0	4.76	3.79	0	18	4	99.6	PIROXICAM	1993	1.49	1.89	1.58	2.4	331.3	2	7	99.6	3	15	1	0.07	2
C[C@]12CC[C@H]3[C@@H](CCC4=CC(=CC=C34)O[S](O)(=O)=O)[C@@H]1CCC2=O	3.89	3.45	4.45	1	0	4 0	4	1.822	30	8.936	42	11	0.61	4	0	24	0.33	5	1	1.46	1.46	3.83	350.43	1	-1.75	0	0	10	13	80.67	ESTROPIPATE	1993	2.42	1.82	3.29	1.5	350.4	1	5	80.7	2	18	11	0.61	1
CCCC(NC(C)C(=O)N1[C@H]2CCCC[C@H]2CC1C(O)=O)C(=O)OCC	3.81	2.04	2.04	0	0	5 0	5	1.21	30	9.786	0	16	0.84	4	1	26	0.37	7	2	-0.23	-0.85	0.63	368.47	1	3.79	5.48	1	6	20	95.94	PERINDOPRIL ERBUMINE	1993	0.09	1.21	1.94	2.3	368.5	2	7	95.9	10	19	16	0.84	0
CCOC(=O)N1CCC(CC1)=C2C3=C(CCC4=C2N=CC=C4)C=C(Cl)C=C3	7.46	7.62	9.62	2	0	0 0	0	5.051	0	10.835	0	8	0.36	2	0	27	0.18	4	0	4.55	4.55	4.55	382.89	0	14	4.33	0	16	11	42.43	LORATADINE	1993	5.2	5.05	4.89	5.3	382.9	0	4	42.4	3	22	8	0.36	2
CC1=C(CCN2CCC(CC2)C3=NOC4=C3C=CC(=C4)F)[C](=O)[N]5CCCCC5=N1	5.41	2.47	5.47	3	0	0 0	0	2.711	0	11.276	0	12	0.52	3	0	30	0.26	6	0	0.39	1.25	2.63	410.49	0	14	8.76	1	16	14	64.16	RISPERIDONE	1993	3.99	2.71	3.59	3.1	410.5	0	6	64.2	4	23	12	0.52	3
NCCS	2.95	-1.03	-1.03	0	0	0 0	0	-0.252	0	2.28	0	2	1	0	2	4	1	1	1	-2.89	-2.2	-0.42	77.15	0	9.42	10.4	1	0	4	26.02	CYSTEAMINE BITARTRATE	1994	0.2	-0.25	-0.13	-0.18	77.2	1	1	26	1	2	2	1	0
CCC1(C)CC(=O)NC1=O	2.54	0.6	0.6	0	0	1 0	1	0.395	20	3.687	0	5	0.71	2	1	10	0.43	3	1	0.55	0.55	0.55	141.17	0	10.73	0	0	4	6	46.17	ETHOSUXIMIDE	1994	0.22	0.39	0.45	0.45	141.2	1	3	46.2	1	7	5	0.71	0
CCC1C(COC1=O)CC2=CN=C[N]2C	3.13	2.39	3.39	1	0	2 0	2	-0.203	0	5.629	0	7	0.64	2	0	15	0.36	4	0	0.79	0.92	0.95	208.26	0	14	6.37	0	7	8	44.12	PILOCARPINE HYDROCHLORIDE	1994	1.42	-0.2	1.16	-0.52	208.3	0	4	44.1	3	11	7	0.64	1
CC1=C[N](C2OC(CO)C=C2)[C](=O)[NH][C]1=O	0.84	0.11	1.11	1	0	2 0	2	-0.488	0	5.579	0	4	0.4	4	2	16	0.6	6	2	-0.23	-0.23	-0.23	224.22	0	9.95	0	0	10	6	84.32	STAVUDINE	1994	-0.64	-0.49	-0.71	-0.71	224.2	2	6	84.3	2	10	4	0.4	1
O=[N](=O)OCC(CO[N](=O)=O)O[N](=O)=O	0.3	4.9	4.9	0	0	0 0	0	1.76	0	3.863	0	3	1	6	0	15	2	12	0	0.94	0.94	0.94	227.09	0	14	0	0	6	6	165.15	NITROGLYCERIN	1994	1.21	-5.76	-1.02	1.7	227.1	0	12	165.1	8	3	3	1	0
CC(C(O)=O)C1=CC(=C(C=C1)C2=CC=CC=C2)F	5.82	2.07	4.07	2	0	1 0	1	3.754	0	6.795	0	2	0.13	2	0	18	0.13	2	1	1.88	1.07	3.94	244.26	1	4.42	0	0	14	4	37.3	FLURBIPROFEN	1994	4.16	3.75	3.68	3.6	244.3	1	2	37.3	3	15	2	0.13	2
NC1=CC=C(C=C1)[S](=O)(=O)NC2=NC=CC=N2	0.96	0.65	2.65	2	0	0 0	0	0.1	0	6.388	0	0	0	4	1	17	0.7	6	2	0.28	-0.05	0.39	250.28	1	6.99	2.01	0	14	2	97.97	SULFADIAZINE	1994	-0.09	0.1	0.86	0.11	250.3	2	6	98	3	10	0	0	2
CN=C(NCCSCC1=C(C)[NH]C=N1)NC#N	1.67	1.01	2.01	1	0	0 1	1	0.19	59	6.902	0	5	0.5	2	3	17	0.7	6	3	-0.58	-0.22	-0.11	252.34	0	13.38	6.91	1	7	8	88.89	CIMETIDINE	1994	0.4	0.19	0.6	-0.35	252.3	3	6	88.9	8	10	5	0.5	1
CCCCCC1=CC2=C([C@@H]3C=C(C)CC[C@H]3C(C)(C)O2)C(=C1)O	9.06	7.25	8.25	1	0	2 0	2	7.238	51	9.572	0	13	0.62	1	1	23	0.1	2	1	5.94	5.94	5.94	314.47	0	9.34	0	0	8	15	29.46	DRONABINOL	1994	6.24	7.24	5.74	7	314.5	1	2	29.5	4	21	13	0.62	1
CC\C(C1=CC=CC=C1)=C(/C2=CC=CC=C2)C3=CC=C(OCCN(C)C)C=C3	9.12	7.46	10.46	3	0	0 1	1	6.818	0	12.07	0	6	0.23	0	0	28	0.08	2	0	4.11	4.97	6.35	371.52	0	14	8.76	1	20	8	12.47	TAMOXIFEN CITRATE	1994	6.25	6.82	6	6.2	371.5	0	2	12.5	8	26	6	0.23	3
CC(C)[N]1C2=CC=CC=C2C(=C1C=CC(O)CC(O)CC(O)=O)C3=CC=C(F)C=C3	5.14	2.33	5.33	3	0	2 1	3	4.048	0	11.516	0	7	0.29	4	2	30	0.21	5	3	1.87	1.05	3.83	411.47	1	4.54	0	0	19	11	82.69	FLUVASTATIN SODIUM	1994	4.13	4.05	4.63	2.9	411.5	3	5	82.7	8	24	7	0.29	3
CCC1OC(=O)C(C)C(OC2C[C@@](C)(OC)C(O)C(C)O2)C(C)C(OC3OC(C)CC(C3O)N(C)C)[C@](C)(O)CC(C)CN(C)C(C)C(O)[C@]1(C)O	4.88	5.24	5.24	0	0	18 0	18	2.638	0	19.727	0	37	0.97	11	5	52	0.37	14	5	-2.89	-1.23	2.44	749	0	12.44	9.57	2	2	50	180.08	AZITHROMYCIN DIHYDRATE	1994	2.9	2.64	1.9	2.2	749	5	14	180.1	7	38	37	0.97	0
NC(CC1=CC(=C(OC2=CC(=C(O)C(=C2)I)I)C(=C1)I)I)C(O)=O	5.75	2.07	4.07	2	0	1 0	1	3.508	0	12.681	0	2	0.13	4	2	24	0.33	5	3	3.68	3.44	3.73	776.87	1	0.27	9.43	1	14	10	92.78	LEVOTHYROXINE SODIUM	1994	1.56	3.51	4.56	5.4	776.9	3	5	92.8	5	15	2	0.13	2
COC1CC(CCC1O)C=C(C)C2OC(=O)C3CCCCN3C(=O)C(=O)[C@]4(O)OC(C(CC(C)CC(=CC(CC=C)C(=O)CC(O)C2C)C)OC)C(CC4C)OC	7.48	5.99	5.99	0	0	14 2	16	5.776	40	21.535	0	34	0.77	11	3	57	0.3	13	3	5.59	5.59	5.59	804.03	0	9.96	0	0	14	43	178.36	TACROLIMUS	1994	3.3	5.78	4.64	4	804	3	13	178.4	7	44	34	0.77	0
NC1=CC(=C(C=C1)C(O)=O)O	1.34	-1.26	-0.26	1	0	0 0	0	1.056	0	3.863	0	0	0	3	2	11	0.57	4	3	-1.75	-2.23	0.83	153.14	1	3.68	2.19	0	8	3	83.55	AMINOSALICYLIC ACID	1995	1.2	1.06	0.67	0.67	153.1	3	4	83.6	1	7	0	0	1
CC(N)COC1=C(C)C=CC=C1C	5.58	2.8	3.8	1	0	1 0	1	2.569	0	5.529	0	5	0.45	0	1	13	0.18	2	1	-0.26	0.39	2.46	179.26	0	14	9.52	1	6	7	35.25	MEXILETINE HYDROCHLORIDE	1995	2.28	2.57	2.03	2.2	179.3	1	2	35.3	3	11	5	0.45	1
NC1=N[C](=O)[N](C=C1)C2CSC(CO)O2	0.12	-0.36	0.64	1	0	2 0	2	-1.462	30	5.639	0	4	0.5	4	2	15	0.88	6	2	-1.1	-1.1	-1.1	229.25	0	14	0.21	0	7	8	90.37	LAMIVUDINE	1995	-1.04	-1.46	-0.59	-1	229.3	2	6	90.4	2	8	4	0.5	1
NC1=NC2=C(S1)C=C(OC(F)(F)F)C=C2	5.21	5.94	7.94	2	0	0 0	0	3.235	0	5.007	0	1	0.13	1	1	15	0.5	3	1	3.39	3.4	3.4	234.2	0	14	4.57	0	9	6	48.14	RILUZOLE	1995	2.9	3.23	2.78	3.1	234.2	1	3	48.1	2	8	1	0.13	2
NCCCC(O)([P](O)(O)=O)[P](O)(O)=O		0.11	0.11	0	0	0 0	0	-5.642	40	4.748	0	4	1	7	2	14	2	8	6	-6.28	-6.56	-4.19	249.1	4	0.69	9.91	1	4	10	161.31	ALENDRONATE SODIUM	1995	-0.3	-5.64	-1.27	-3	249.1	6	8	161.3	5	4	4	1	0
NC1=NC(=C(N=N1)C2=C(Cl)C(=CC=C2)Cl)N	3.6	3.35	5.35	2	0	0 0	0	2.534	0	6.287	0	0	0	3	2	16	0.56	5	2	1.83	1.91	1.93	256.09	0	14	5.87	0	12	4	90.71	LAMOTRIGINE	1995	2.08	2.53	2.01	1.6	256.1	2	5	90.7	1	9	0	0	2
COC1=CC=CC(=C1)[C@@]2(O)CCCCC2CN(C)C	5.74	2.37	3.37	1	0	2 0	2	3.1	0	7.824	0	10	0.63	1	1	19	0.19	3	1	-0.21	0.62	2.45	263.38	0	13.8	9.23	1	6	13	32.7	TRAMADOL HYDROCHLORIDE	1995	2.63	3.1	2.64	2.6	263.4	1	3	32.7	4	16	10	0.63	1
OC(=O)CC1=CC=CC=C1NC2=C(Cl)C=CC=C2Cl	5.92	3.3	5.3	2	0	0 0	0	4.576	0	7.668	0	1	0.07	2	1	19	0.21	3	2	1.79	1.1	4.26	296.15	1	4	0	0	14	5	49.33	DICLOFENAC SODIUM	1995	4.86	4.73	4.36	4	296.2	2	3	49.3	4	14	1	0.07	2
CC(=O)CC(C1=CC=CC=C1)C2=C(O)C3=C(O[C]2=O)C=CC=C3	4.87	2.38	5.38	3	0	1 0	1	2.901	0	8.718	0	3	0.16	3	1	23	0.21	4	1	1.76	0.94	2.74	308.33	0	5.56	0	0	19	4	67.51	WARFARIN SODIUM	1995	2.7	2.9	3.61	2.6	308.3	1	4	67.5	4	19	3	0.16	3
CC(C)C(N)C(=O)OCCOC[N]1C=NC2=C1[NH]C(=N[C]2=O)N	-0.07	1.39	3.39	2	0	1 0	1	-1.402	10	8.176	0	7	0.54	5	3	23	0.77	10	3	-1.08	-0.49	-0.45	324.34	0	8.1	7.36	1	12	11	151.14	VALACYCLOVIR HYDROCHLORIDE	1995	-0.55	-1.4	-0.8	-1.3	324.3	3	10	151.1	8	13	7	0.54	2
OC1=C(C2CCC(CC2)C3=CC=C(Cl)C=C3)C(=O)C4=CC=CC=C4C1=O	8.11	6.61	8.61	2	0	0 0	0	6.351	0	10.022	40	6	0.27	3	1	26	0.14	3	1	4.16	3.33	5	366.84	0	5.73	0	0	18	8	54.37	ATOVAQUONE	1995	5.3	6.35	5.51	5.5	366.8	1	3	54.4	2	22	6	0.27	2
NC(C(=O)NC1[C@H]2SCC(=C(N2C1=O)C(O)=O)Cl)C3=CC=CC=C3	0.61	-0.02	0.98	1	0	3 0	3	-1.636	41	9.223	0	4	0.27	4	2	24	0.53	7	3	-2.37	-2.66	-2.31	367.8	1	3.03	7.23	1	14	10	112.73	CEFACLOR	1995	-1.79	-1.64	0.62	-0.31	367.8	3	7	112.7	5	15	4	0.27	1
CC1=C(OCC(F)(F)F)C=CN=C1C[S](=O)C2=NC3=CC=CC=C3[NH]2	4.36	4.69	7.69	3	0	1 0	1	2.598	41	8.789	0	4	0.25	3	1	25	0.38	5	1	3.03	3.03	3.03	369.36	0	9.35	4.16	0	17	8	67.87	LANSOPRAZOLE	1995	2.97	2.6	3.52	2.5	369.4	1	5	67.9	6	16	4	0.25	3
COC(=O)C1=C(C)NC(=C(C1C2=CC=CC=C2[N](=O)=O)C(=O)OCC(C)C)C	5.8	5.87	6.87	1	0	1 0	1	4.582	20	10.463	0	8	0.4	3	1	28	0.4	8	1	3.06	3.06	3.06	388.42	0	14	0	0	16	11	110.45	NISOLDIPINE	1995	4.53	4.58	3.2	3.7	388.4	1	8	110.4	8	20	8	0.4	1
NC1=NC(=CS1)C(=CCC(O)=O)C(=O)NC2[C@H]3SCC=C(N3C2=O)C(O)=O	-0.76	-0.26	0.74	1	0	2 1	3	-1.21	30	9.96	0	4	0.27	7	2	27	0.8	10	4	-5.62	-6.79	-1.41	410.42	2	2.99	4.69	0	17	10	162.92	CEFTIBUTEN DIHYDRATE	1995	-0.38	-1.21	-0.05	-1.8	410.4	4	10	162.9	7	15	4	0.27	1
CCCCC1=NC(=C(CO)[N]1CC2=CC=C(C=C2)C3=CC=CC=C3C4=N[NH]N=N4)Cl	4.93	3.81	7.81	4	0	0 0	0	3.862	0	11.664	0	6	0.27	4	1	30	0.32	7	2	5.08	5.03	5.08	422.92	1	8.3	3.85	0	22	8	92.51	LOSARTAN POTASSIUM	1995	3.83	4.11	4.27	4.2	422.9	2	7	92.5	8	22	6	0.27	4
CC(O)(C[S](=O)(=O)C1=CC=C(F)C=C1)C(=O)NC2=CC(=C(C=C2)C#N)C(F)(F)F	4.92	4.33	6.33	2	0	1 0	1	2.707	0	9.489	0	4	0.22	5	2	29	0.39	6	2	2.71	2.71	2.71	430.37	0	11.95	0	0	16	10	107.26	BICALUTAMIDE	1995	3.78	2.71	2.88	2.4	430.4	2	6	107.3	8	18	4	0.22	2
COC1=C(C\C=C(/C)CCC(=O)OCCN2CCOCC2)C(=C3C(=O)OCC3=C1C)O	5.61	5.23	6.23	1	0	0 1	1	2.98	0	11.399	0	13	0.57	4	1	31	0.35	8	1	3.3	3.45	3.47	433.5	0	9.76	6.19	1	12	19	94.53	MYCOPHENOLATE MOFETIL	1995	2.59	2.98	2.52	3.4	433.5	1	8	94.5	10	23	13	0.57	1
NC1=N[C](=O)C2=NC(=CN=C2[NH]1)CNC3=CC=C(C=C3)C(=O)NC(CCC(O)=O)C(O)=O	-2.58	-0.6	2.4	3	0	1 0	1	-2.31	10	11.023	0	4	0.21	9	4	32	0.68	13	6	-5.8	-7.12	-0.68	441.4	2	3.37	2.09	0	23	9	213.28	FOLIC ACID	1995	-0.01	-2.31	-0.04	-0.54	441.4	6	13	213.3	10	19	4	0.21	3
CCOC(=O)C(CCC1=CC=CC=C1)NC(C)C(=O)N2CC3=CC(=C(OC)C=C3CC2C(O)=O)OC	3.92	2.96	4.96	2	0	3 0	3	1.394	30	13.436	0	12	0.44	4	1	36	0.33	9	2	0.41	-0.08	1.5	498.58	1	3.46	5.2	1	18	18	114.4	MOEXIPRIL HYDROCHLORIDE	1995	0.73	1.39	2.58	3	498.6	2	9	114.4	13	27	12	0.44	2
CC(C)(C)N=C(O)[C@@H]1C[C@@H]2CCCC[C@@H]2CN1C[C@@H](O)[C@H](CC3=CC=CC=C3)N=C(O)[C@H](CC(O)=N)NC(=O)C4=NC5=CC=CC=C5C=C4	6.55	4.87	7.87	3	0	6 2	8	5.845	59	18.949	0	19	0.5	9	6	49	0.29	11	6	-1.84	-2.64	-0.53	670.86	0	-0.96	12.55	1	24	25	174.72	SAQUINAVIR MESYLATE	1995	4.09	5.84	5.82	7.4	670.8	6	11	174.7	14	38	19	0.5	3
NC(=N)NCCCC(NC(=O)C1CCCN1C(=O)C2CSSCCC(=O)NC(CC3=CC=C(O)C=C3)C(=O)NC(CC4=CC=CC=C4)C(=O)NC(CCC(N)=O)C(=O)NC(CC(N)=O)C(=O)N2)C(=O)NCC(N)=O				2	0	7 0	7	-3.144	30	27.757	0	22	0.48	12	14	74	0.61	26	14	-8.02	-7.78	-6.13	1069.22	0	9.5	11.77	1	36	38	435.41	DESMOPRESSIN ACETATE	1995	-0.71	-3.14	-4.13	0	1069	14	26	435.4	23	46	22	0.48	2
CC1OC1[P](O)(O)=O		-0.62	-0.62	0	0	2 0	2	-0.228	40	2.641	0	3	1	4	0	8	1.33	4	2	-3.06	-3.18	-0.74	138.06	2	1.25	0	0	2	6	70.06	FOSFOMYCIN TROMETHAMINE	1996	-0.95	-0.23	-0.09	-0.62	138.1	2	4	70.1	1	3	3	1	0
CCC(C(O)=O)C1=CC=CC=C1	4.4	0.86	1.86	1	0	1 0	1	2.252	0	4.733	0	3	0.3	2	0	12	0.2	2	1	0.76	-0.08	2.6	164.2	1	4.66	0	0	8	4	37.3	SODIUM PHENYLBUTYRATE	1996	2.15	2.25	2.27	2.1	164.2	1	2	37.3	3	10	3	0.3	1
CC(CC1=CC=CC=C1)N(C)CC#C	6.22	4.77	5.77	1	0	1 0	1	2.844	0	6.101	0	5	0.38	0	0	14	0.08	1	0	0.69	1.55	2.85	187.29	0	14	8.67	1	6	6	3.24	SELEGILINE HYDROCHLORIDE	1996	2.63	3.02	2.18	2.8	187.3	0	1	3.2	5	13	5	0.38	1
OCCN1CC(O)C(O)C(O)C1CO	-0.39	-1.3	-1.3	0	0	4 0	4	-1.256	0	4.845	0	8	1	5	5	14	0.75	6	5	-4.32	-3.6	-3.19	207.23	0	12.91	7.6	1	0	14	104.39	MIGLITOL	1996	-1.63	-1.26	-3.26	-3.1	207.2	5	6	104.4	3	8	8	1	0
CC(CS)C(=O)N1CCCC1C(O)=O	3.06	-0.14	-0.14	0	0	2 0	2	0.89	30	5.574	0	7	0.78	3	1	14	0.56	4	1	-1.72	-2.42	0.73	217.28	1	4.02	0	0	4	10	57.61	CAPTOPRIL	1996	0.7	0.89	0.63	0.97	217.3	1	4	57.6	4	9	7	0.78	0
CC(N(O)C(N)=O)C1=CC2=CC=CC=C2S1	3.99	2.91	4.91	2	0	1 0	1	2.483	41	6.503	0	2	0.18	2	1	16	0.45	4	2	2	1.99	2.01	236.29	1	8.84	0	0	11	5	66.56	ZILEUTON	1996	2.17	2.48	2.73	1.2	236.3	2	4	66.6	3	11	2	0.18	2
CC(NC(C)(C)C)C(=O)C1=CC(=CC=C1)Cl	5.92	4.9	5.9	1	0	1 0	1	3.211	0	6.831	0	6	0.46	1	1	16	0.15	2	1	1.55	2.39	3.27	239.74	0	14	8.22	1	8	8	29.1	BUPROPION HYDROCHLORIDE	1996	3.35	3.21	3.3	3.2	239.7	1	2	29.1	4	13	6	0.46	1
COC1=CC(=C(OC)C=C1)C(O)CNC(=O)CN	1.67	-0.08	0.92	1	0	1 0	1	-0.354	0	6.704	0	5	0.42	2	3	18	0.5	6	3	-2.58	-1.76	-0.95	254.29	0	13.79	8.14	1	8	10	93.81	MIDODRINE HYDROCHLORIDE	1996	-0.64	-0.35	-0.19	-1.3	254.3	3	6	93.8	7	12	5	0.42	1
CCCSC1=CC2=C(C=C1)N=C(NC(=O)OC)[NH]2	4.44	4.59	6.59	2	0	0 0	0	3.461	0	7.278	0	4	0.33	2	2	18	0.5	5	2	3.2	3.2	3.2	265.33	0	9.51	4.27	0	11	7	67.01	ALBENDAZOLE	1996	2.65	3.46	3.24	3.1	265.3	2	5	67	6	12	4	0.33	2
CN1CCN2C(C1)C3=CC=CC=C3CC4=C2N=CC=C4	5.65	4.2	6.2	2	0	1 0	1	2.814	0	8.154	0	6	0.35	0	0	20	0.18	3	0	2.8	3.13	3.21	265.36	0	14	6.67	1	12	8	19.37	MIRTAZAPINE	1996	2.13	2.81	2.48	2.3	265.4	0	3	19.4	0	17	6	0.35	2
C[C@]12CC[C@H]3[C@@H](CCC4=C3C=CC(=C4)O)[C@@H]1CCC2O	5.9	4.29	5.29	1	0	5 0	5	3.784	0	8.028	0	12	0.67	2	2	20	0.11	2	2	3.75	3.74	3.75	272.39	0	10.33	0	0	6	14	40.46	ESTRADIOL	1996	3.86	3.78	3.61	3.7	272.4	2	2	40.5	0	18	12	0.67	1
CN(C\C=C\C#CC(C)(C)C)CC1=CC=CC2=CC=CC=C12	8.58	9.12	11.12	2	0	0 1	1	5.96	0	9.771	0	7	0.33	0	0	22	0.05	1	0	3.2	4.06	5.53	291.44	0	14	8.86	1	12	8	3.24	TERBINAFINE HYDROCHLORIDE	1996	5.2	5.96	4.88	5.1	291.4	0	1	3.2	6	21	7	0.33	2
CC(C)(C#N)C1=CC(=CC(=C1)C[N]2C=NC=N2)C(C)(C)C#N	4.28	6.14	8.14	2	0	0 0	0	1.475	0	8.409	0	7	0.41	4	0	22	0.29	5	0	3.03	3.03	3.03	293.37	0	14	2	0	11	7	78.29	ANASTROZOLE	1996	2.94	1.29	2.93	0.89	293.4	0	5	78.3	6	17	7	0.41	2
CN1[C@@H]2CC[C@H]1CC(C2)OC(C3=CC=CC=C3)C4=CC=CC=C4	6.82	5.01	7.01	2	0	3 0	3	3.52	0	9.541	0	9	0.43	1	0	23	0.1	2	0	1.27	2.06	4.19	307.44	0	14	9.54	1	12	11	12.47	BENZTROPINE MESYLATE	1996	4.78	3.52	4.42	4.7	307.4	0	2	12.5	4	21	9	0.43	2
CN(C)CCCN1C2=CC=CC=C2CCC3=C1C=C(Cl)C=C3	8.41	5.2	7.2	2	0	0 0	0	5.921	0	9.498	0	7	0.37	0	0	22	0.11	2	0	2.25	3.09	4.88	314.86	0	14	9.2	1	12	10	6.48	CLOMIPRAMINE HYDROCHLORIDE	1996	5.46	5.92	4.53	5.1	314.9	0	2	6.5	4	19	7	0.37	2
CC1(C)NC(=O)N(C1=O)C2=CC(=C(C=C2)[N](=O)=O)C(F)(F)F	3.88	4.37	5.37	1	0	0 0	0	1.708	0	6.761	0	4	0.33	3	1	22	0.58	7	1	2.25	2.25	2.25	317.22	0	14	0	0	12	9	95.23	NILUTAMIDE	1996	2.86	1.71	2.45	2	317.2	1	7	95.2	3	12	4	0.33	1
COC1=C(C)C(=C(\C=C\C(C)=C\C=C\C(C)=C\C(O)=O)C(=C1)C)C	8.02	5.54	6.54	1	0	0 4	4	6.065	0	10.646	0	6	0.29	2	0	24	0.14	3	1	4.09	3.23	5.59	326.44	1	5.01	0	0	16	8	46.53	ACITRETIN	1996	4.77	6.07	5.17	6.3	326.4	1	3	46.5	6	21	6	0.29	1
FC1=CC=C(C=C1)C2CCNCC2COC3=CC4=C(OCO4)C=C3	5.8	3.31	5.31	2	0	2 0	2	4.238	0	8.935	0	7	0.37	0	1	24	0.21	4	1	0.19	0.83	3.15	329.37	0	14	9.77	1	12	12	39.72	PAROXETINE HYDROCHLORIDE	1996	3.22	4.24	3.33	3.8	329.4	1	4	39.7	4	19	7	0.37	2
CN\C(NCCSCC1=CSC(=N1)CN(C)C)=C/[N](=O)=O	2.48	-0.04	0.96	1	0	0 1	1	-0.162	20	9.035	0	7	0.58	2	2	21	0.75	7	2	0.44	0.71	0.76	331.45	0	14	6.54	1	9	11	86.01	NIZATIDINE	1996	1.21	-0.16	1.32	-0.17	331.5	2	7	86	10	12	7	0.58	1
C[C@]12CC3=C(ON=C3)C=C1CC[C@@H]4[C@@H]2CC[C@@]5(C)[C@H]4CC[C@@]5(O)C#C	6.64	8.51	9.51	1	0	6 0	6	3.747	0	9.795	0	15	0.68	2	1	25	0.14	3	1	3.46	3.46	3.46	337.46	0	14	0.24	0	7	16	46.26	DANAZOL	1996	4.22	3.93	4.22	3.7	337.5	1	3	46.3	1	22	15	0.68	1
CC1COC2=C3[N]1C=C(C(O)=O)[C](=O)C3=CC(=C2N4CCN(C)CC4)F	2.27	1.04	3.04	2	0	1 0	1	-0.508	0	9.293	0	8	0.44	3	0	26	0.39	7	1	0.45	-0.28	0.65	361.37	1	5.45	6.2	1	13	13	75.01	LEVOFLOXACIN	1996	0.63	-0.51	1.54	1.9	361.4	1	7	75	2	18	8	0.44	2
CC1=C(N2[C@H](SC1)C(NC(=O)C(N)C3=CC=C(O)C=C3)C2=O)C(O)=O	-0.85	-0.14	0.86	1	0	3 0	3	-2.507	41	9.348	0	5	0.31	5	3	25	0.56	8	4	-2.5	-2.8	-2.44	363.39	1	3.45	7.22	1	14	11	132.96	CEFADROXIL HEMIHYDRATE	1996	-2.06	-2.51	0.15	-0.7	363.4	4	8	133	5	16	5	0.31	1
CCCCNC1=C(OC2=CC=CC=C2)C(=CC(=C1)C(O)=O)[S](N)(=O)=O	3.47	2.01	4.01	2	0	0 0	0	3.372	0	9.471	0	4	0.24	5	2	25	0.47	7	3	0.72	-0.13	2.42	364.42	1	4.69	2.7	0	16	8	118.72	BUMETANIDE	1996	2.52	3.37	3.04	3.4	364.4	3	7	118.7	8	17	4	0.24	2
CC1CC2=CC=CC=C2N1NC(=O)C3=CC(=C(Cl)C=C3)[S](N)(=O)=O	4.06	3.8	5.8	2	0	1 0	1	2.957	30	9.383	0	3	0.19	3	2	24	0.44	6	2	2.64	2.63	2.64	365.83	0	8.85	0.1	0	16	7	92.5	INDAPAMIDE	1996	2.06	2.96	2.08	1.8	365.8	2	6	92.5	4	16	3	0.19	2
CN1CCN(CCCN2C3=CC=CC=C3SC4=C2C=C(Cl)C=C4)CC1	7.09	6.31	8.31	2	0	0 0	0	4.582	0	10.959	0	8	0.4	0	0	25	0.2	3	0	2.88	3.69	4.38	373.94	0	14	7.99	1	12	13	9.72	PROCHLORPERAZINE MALEATE	1996	4.6	4.38	4.58	5	373.9	0	3	9.7	4	20	8	0.4	2
COC1=C(OC)C=C2C(=O)C(CC3CCN(CC3)CC4=CC=CC=C4)CC2=C1	7.18	4.98	6.98	2	0	1 0	1	4.598	0	11.121	0	11	0.46	1	0	28	0.17	4	0	2.18	3.04	4.21	379.5	0	14	8.54	1	14	14	38.77	DONEPEZIL HYDROCHLORIDE	1996	3.54	4.6	4.36	4.5	379.5	0	4	38.8	6	24	11	0.46	2
CCOC(=O)C(CCC1=CC=CC=C1)NC(C)C(=O)N2[C@H]3CCCC[C@@H]3CC2C(O)=O	4.69	3.18	4.18	1	0	5 0	5	2.099	30	11.833	0	15	0.63	4	1	31	0.29	7	2	0.91	0.29	1.95	430.55	1	3.8	5.21	1	12	19	95.94	TRANDOLAPRIL	1996	0.96	2.1	2.77	3.2	430.5	2	7	95.9	11	24	15	0.63	1
OC(COC1=CC=CC2=C1[C](=O)C=C(O2)C(O)=O)COC3=C4[C](=O)C=C(OC4=CC=C3)C(O)=O	1.53	-0.09	3.91	4	0	0 0	0	1.481	0	11.305	0	3	0.13	7	1	34	0.48	11	3	-5.49	-5.57	1.48	468.37	2	1.74	0	0	26	8	173.71	CROMOLYN SODIUM	1996	1.65	1.48	2.12	2	468.4	3	11	173.7	8	23	3	0.13	4
CC(C)C1=C(C(=O)NC2=CC=CC=C2)C(=C([N]1CCC(O)CC(O)CC(O)=O)C3=CC=C(F)C=C3)C4=CC=CC=C4	5.41	3.35	7.35	4	0	2 0	2	4.457	0	15.668	0	9	0.27	5	3	41	0.21	7	4	3.21	2.43	5.39	558.65	1	4.31	0	0	27	14	111.79	ATORVASTATIN CALCIUM	1996	5.34	4.46	6.31	5.9	558.6	4	7	111.8	13	33	9	0.27	4
COC1=C(CC2=C[N](C)C3=C2C=C(NC(=O)OC4CCCC4)C=C3)C=CC(=C1)C(=O)N[S](=O)(=O)C5=CC=CC=C5C	7.37	4.45	8.45	4	0	0 0	0	7.092	51	15.74	0	9	0.29	4	2	41	0.32	9	2	5.48	5.46	6.4	575.68	1	4.29	0	0	27	13	115.73	ZAFIRLUKAST	1996	5.12	7.09	5.7	5.8	575.7	2	9	115.7	11	31	9	0.29	4
OC1COC(OC2COC(O)C(O[S](O)(=O)=O)C2O[S](O)(=O)=O)C(O[S](O)(=O)=O)C1O[S](O)(=O)=O	-6.29	-0.14	-0.14	0	0	8 0	8	-4.452	10	9.941	42	10	1	17	2	35	2	21	6	-12.73	-12.73	-11.4	602.47	4	-2.97	0	0	8	23	322.55	PENTOSAN POLYSULFATE SODIUM	1996	-2.92	-4.45	-4.81	0	602.5	6	21	322.5	10	10	10	1	0
CC(C)(C)NC(=O)C1CN(CCN1CC(O)CC(CC2=CC=CC=C2)C(=O)NC3C(O)CC4=CC=CC=C34)CC5=CN=CC=C5	4.88	4.06	7.06	3	0	5 0	5	3.681	0	17.81	0	17	0.47	5	4	45	0.25	9	4	2.36	2.72	2.81	613.8	0	13.04	6.76	1	22	23	118.03	INDINAVIR SULFATE	1996	3.36	3.68	2.87	3	613.8	4	9	118	14	36	17	0.47	3
CC[C@H](C)[C@H]1O[C@]2(CC[C@@H]1C)C[C@@H]3C[C@@H](C\C=C(/C)[C@@H](O[C@H]4C[C@H](OC)[C@@H](O[C@H]5C[C@H](OC)[C@@H](O)[C@H](C)O5)[C@H](C)O4)[C@@H](C)\C=C\C=C6/CO[C@@H]7[C@H](O)C(=C[C@@H](C(=O)O3)[C@]67O)C)O2	7.59	6.25	6.25	0	0	20 3	23	5.388	0	23.122	0	39	0.81	13	3	62	0.29	14	3	5.83	5.83	5.83	875.11	0	12.47	0	0	10	52	170.06	IVERMECTIN	1996	3.33	5.39	5.6	5.5	875.1	3	14	170.1	8	48	39	0.81	0
NC(N)=O	-2.81	-1.56	-1.56	0	0	0 0	0	-1.66	0	1.414	0	0	0	1	2	4	2	3	2	-1.36	-1.36	-1.36	60.06	0	14	0	0	2	2	69.11	UREA C-14	1997	-1.15	-1.66	-0.98	-2.1	60.1	2	3	69.1	0	1	0	0	0
OC(=O)C1=CN=CC=C1	1.37	-0.34	0.66	1	0	0 0	0	0.799	0	3.13	0	0	0	3	0	9	0.5	3	1	-2.25	-2.86	-0.17	123.11	1	2.79	4.19	0	8	1	50.19	NIACIN	1997	0.48	0.8	0.78	0.69	123.1	1	3	50.2	1	6	0	0	1
NC1=N[C](=O)C2=C([NH]1)[N](COCCO)C=N2	-1.64	-0.64	1.36	2	0	0 0	0	-2.205	10	5.452	0	3	0.38	5	3	16	1	8	3	-1.05	-1.13	-1.03	225.21	0	7.99	2.63	0	10	6	119.05	ACYCLOVIR	1997	-1.4	-2.61	-1.33	-1.6	225.2	3	8	119.1	4	8	3	0.38	2
ClC1=C(NC2=NCCN2)C3=NSN=C3C=C1	3.15	2.19	4.19	2	0	0 0	0	2.318	20	6.398	0	2	0.22	2	2	16	0.67	5	2	1	1.68	2.02	253.71	0	14	7.49	1	11	5	62.2	TIZANIDINE HYDROCHLORIDE	1997	1.51	2.09	1.72	1.4	253.7	2	5	62.2	2	9	2	0.22	2
ClC1=CC=C2N=C3NC(=O)CN3CC2=C1Cl	2.91	3.84	4.84	1	0	0 0	0	1.022	40	6.136	0	2	0.2	1	1	16	0.4	4	1	1.94	1.94	1.94	256.09	0	9.25	3.62	1	10	6	44.7	ANAGRELIDE HYDROCHLORIDE	1997	1.41	1.02	1.93	2.1	256.1	1	4	44.7	0	10	2	0.2	1
CCCN(CCC)CCC1=C2CC(=O)NC2=CC=C1	5.46	2.88	3.88	1	0	0 0	0	2.796	0	7.922	0	9	0.56	1	1	19	0.19	3	1	-0.22	0.36	3.06	260.38	0	12.27	10.17	1	8	11	32.34	ROPINIROLE HYDROCHLORIDE	1997	2.79	2.8	2.85	2.9	260.4	1	3	32.3	7	16	9	0.56	1
COC1=CC=C(C=C1)C(CN(C)C)C2(O)CCCCC2	5.89	2.6	3.6	1	0	1 0	1	3.269	0	8.288	0	11	0.65	1	1	20	0.18	3	1	0.36	1.22	2.74	277.41	0	14	8.91	1	6	14	32.7	VENLAFAXINE HYDROCHLORIDE	1997	3.12	3.27	3.04	3.4	277.4	1	3	32.7	5	17	11	0.65	1
C[N]1C=NC2=C1[C](=O)[N](CCCCC(C)=O)[C](=O)[N]2C	2.63	1.59	3.59	2	0	0 0	0	0.116	10	7.345	0	7	0.54	4	0	20	0.54	7	0	0.23	0.23	0.23	278.31	0	14	0	0	13	7	78.89	PENTOXIFYLLINE	1997	0.29	0.12	0.19	0.65	278.3	0	7	78.9	5	13	7	0.54	2
N#CC1=CC=C(C=C1)C([N]2C=NC=N2)C3=CC=C(C=C3)C#N	3.9	4.27	7.27	3	0	0 0	0	1.429	0	8.137	0	1	0.06	4	0	22	0.29	5	0	2.94	2.94	2.94	285.31	0	14	1.89	0	17	1	78.29	LETROZOLE	1997	2.91	1.24	2.66	2.1	285.3	0	5	78.3	5	17	1	0.06	3
CC1C2CC3=CC=C(O)C=C3[C@]1(C)CCN2CC=C(C)C	6.99	4.24	5.24	1	0	3 0	3	4.667	0	8.86	0	11	0.58	1	1	21	0.11	2	1	1.25	1.99	3.89	285.43	0	10.42	9.57	1	8	13	23.47	PENTAZOCINE HYDROCHLORIDE	1997	4.64	4.67	3.88	4.4	285.4	1	2	23.5	2	19	11	0.58	1
CCC1=C2[NH]C3=C(CCOC3(CC)CC(O)=O)C2=CC=C1	4.69	2.41	4.41	2	0	1 0	1	3.432	0	8.145	0	8	0.47	3	1	21	0.24	4	2	1.67	0.83	3.44	287.36	1	4.73	0	0	11	10	62.32	ETODOLAC	1997	3.72	3.43	3.38	2.5	287.4	2	4	62.3	4	17	8	0.47	2
ClC1=CC2=C(C=C1)[N]3C=NN=C3CN=C2C4=CC=CC=C4	4.85	3.88	6.88	3	0	0 0	0	2.286	41	8.376	0	1	0.06	3	0	21	0.25	4	0	2.89	2.9	2.9	294.74	0	14	4.9	0	19	2	43.07	ESTAZOLAM	1997	2	2.29	3.27	2.1	294.7	0	4	43.1	1	16	1	0.06	3
O=C1CN2[C@@H]3CC(C[C@H]2CC1C3)OC(=O)C4=C[NH]C5=C4C=CC=C5	4.04	3.7	5.7	2	0	4 0	4	2.344	0	8.969	0	9	0.47	2	1	24	0.26	5	1	2.26	2.32	2.33	324.38	0	12.18	5.68	1	13	11	62.4	DOLASETRON MESYLATE	1997	2.61	2.34	2.52	3.3	324.4	1	5	62.4	3	19	9	0.47	2
CC1(C)O[C@@H]2CO[C@@]3(CO[S](N)(=O)=O)OC(C)(C)O[C@H]3[C@@H]2O1	1.03	1.03	1.03	0	0	4 0	4	0.042	40	7.371	42	12	1	7	1	22	0.83	9	1	0.13	0.13	0.13	339.36	0	11.09	0	0	2	19	115.54	TOPIRAMATE	1997	0.85	0.04	-0.4	0.47	339.4	1	9	115.5	3	12	12	1	0
CC1=C(SC=C1)C(=CCCN2CCCC(C2)C(O)=O)C3=C(C)C=CS3	5.43	1.88	3.88	2	0	1 0	1	2.775	0	10.814	0	9	0.45	2	0	25	0.25	3	1	2.6	2.6	2.6	375.55	1	4.14	9.26	1	14	11	40.54	TIAGABINE HYDROCHLORIDE	1997	4.45	2.78	5.05	5.3	375.6	1	3	40.5	6	20	9	0.45	2
OCCOCCN1CCN(CC1)C2=NC3=CC=CC=C3SC4=CC=CC=C24	4.91	3.65	5.65	2	0	0 0	0	2.992	30	11.06	0	8	0.38	2	1	27	0.29	5	1	2.14	2.64	2.81	383.51	0	14	7.06	1	14	13	48.3	QUETIAPINE FUMARATE	1997	2.55	2.99	2.86	2.8	383.5	1	5	48.3	6	21	8	0.38	2
OC(=O)COCCN1CCN(CC1)C(C2=CC=CC=C2)C3=CC=C(Cl)C=C3	4.44	2.98	4.98	2	0	1 0	1	2.08	0	10.767	0	8	0.38	3	0	27	0.24	5	1	0.85	0.65	0.87	388.89	1	3.59	7.42	1	14	13	53.01	CETIRIZINE HYDROCHLORIDE	1997	1.7	2.08	3.15	3.4	388.9	1	5	53	8	21	8	0.38	2
CN(C)CCOC1=CC=C(C=C1)\C(=C(\CCCl)C2=CC=CC=C2)C3=CC=CC=C3	8.94	8.86	11.86	3	0	0 1	1	6.531	0	12.561	0	6	0.23	0	0	29	0.08	2	0	4.03	4.89	6.27	405.97	0	14	8.76	1	20	9	12.47	TOREMIFENE CITRATE	1997	6.34	6.53	6.22	6.4	406	0	2	12.5	9	26	6	0.23	3
COC1=CC=CC=C1OCCNCC(O)COC2=CC=CC3=C2C4=CC=CC=C4[NH]3	5.51	4.24	8.24	4	0	1 0	1	4.041	0	11.769	0	6	0.25	1	3	30	0.25	6	3	1.22	2.07	3.42	406.48	0	14	8.74	1	19	11	75.74	CARVEDILOL	1997	3.74	4.04	3.74	3.6	406.5	3	6	75.7	10	24	6	0.25	4
CCOC1=CC=CC=C1OCCNC(C)CC2=CC(=C(OC)C=C2)[S](N)(=O)=O	4.08	3.35	5.35	2	0	1 0	1	2.167	0	10.979	0	8	0.4	2	2	28	0.4	7	2	-0.27	0.47	2.04	408.51	0	9.93	9.28	1	14	13	99.88	TAMSULOSIN HYDROCHLORIDE	1997	2.83	2.17	2.34	2.5	408.5	2	7	99.9	11	20	8	0.4	2
CCCCC1=NC2(CCCC2)C(=O)N1CC3=CC=C(C=C3)C4=CC=CC=C4C5=N[NH]N=N5	6.46	4.85	7.85	3	0	0 0	0	6.054	59	12.314	0	10	0.4	4	0	32	0.28	7	1	5.49	5.45	5.5	428.54	1	8.3	4.12	0	21	11	87.13	IRBESARTAN	1997	3.95	6.05	4.78	4.6	428.5	1	7	87.1	7	25	10	0.4	3
NCC1OC(OC2C(N)CC(N)C(OC3OC(CO)C(O)C(N)C3O)C2O)C(N)CC1O	-2	1.09	1.09	0	0	14 0	14	-3.445	0	11.215	0	18	1	9	10	32	0.78	14	10	-17.02	-13.16	-6.48	467.52	0	12.54	9.66	5	0	32	268.17	TOBRAMYCIN	1997	-2.16	-4.72	-6.3	-7	467.5	10	14	268.2	6	18	18	1	0
CC(C)(C(O)=O)C1=CC=C(C=C1)C(O)CCCN2CCC(CC2)C(O)(C3=CC=CC=C3)C4=CC=CC=C4	4.51	3.11	6.11	3	0	1 0	1	1.957	0	14.891	0	13	0.41	4	2	37	0.16	5	3	2.94	2.93	2.94	501.67	1	4.04	9.01	1	20	17	81	FEXOFENADINE HYDROCHLORIDE	1997	4.07	1.96	5.51	4.8	501.7	3	5	81	10	32	13	0.41	3
CC1=C(C=CC=C1O)C(=O)NC(CSC2=CC=CC=C2)C(O)CN3C[C@H]4CCCC[C@H]4CC3C(=O)NC(C)(C)C	7.14	4.33	6.33	2	0	5 0	5	5.842	0	16.411	0	18	0.56	4	4	40	0.25	7	4	3.25	4.09	4.72	567.79	0	9.32	8.18	1	16	24	101.9	NELFINAVIR MESYLATE	1997	4.41	5.84	4.75	5.3	567.8	4	7	101.9	12	32	18	0.56	2
NCC1OC(OC2C(O)C(OC2CO)OC3C(O)C(N)CC(N)C3OC4OC(CO)C(O)C(O)C4N)C(N)C(O)C1O	-4.41	1.58	1.58	0	0	19 0	19	-6.523	0	14.122	0	23	1	14	13	42	0.83	19	13	-17.81	-13.96	-8.31	615.63	0	12.23	9.68	5	0	42	347.32	PAROMOMYCIN SULFATE	1997	-2.96	-6.52	-8.86	-9	615.6	13	19	347.3	9	23	23	1	0
NC(=O)NO	-3.36	-0.8	-0.8	0	0	0 0	0	-1.8	0	1.567	0	0	0	2	2	5	2	4	3	-1.37	-1.37	-1.37	76.06	1	10.14	0	0	2	3	75.35	HYDROXYUREA	1998	-1.17	-1.8	-0.96	-1.5	76.1	3	4	75.4	1	1	0	0	0
NC(=O)C1=N[N](C=N1)C2OC(CO)C(O)C2O	-2.81	-0.8	0.2	1	0	4 0	4	-2.849	0	5.318	0	5	0.63	7	4	17	1.12	9	4	-2.77	-2.77	-2.77	244.21	0	11.88	0	0	7	10	143.72	RIBAVIRIN	1998	-1.85	-2.85	-3.01	-2.8	244.2	4	9	143.7	3	8	5	0.63	1
OC(=O)C1CC[N]2C1=CC=C2C(=O)C3=CC=CC=C3	3.46	1.19	3.19	2	0	1 0	1	1.622	0	6.995	0	3	0.2	3	0	19	0.27	4	1	-0.33	-0.96	2.28	255.27	1	3.84	0	0	15	4	59.3	KETOROLAC TROMETHAMINE	1998	2.34	1.62	2.29	2.5	255.3	1	4	59.3	3	15	3	0.2	2
CN(C)CCC1=C[NH]C2=C1C=C(C[N]3C=NC=N3)C=C2	3.2	0.54	3.54	3	0	0 0	0	1.178	0	8.012	0	5	0.33	2	1	20	0.33	5	1	-1.16	-0.37	1.77	269.35	0	14	9.56	1	14	6	49.74	RIZATRIPTAN BENZOATE	1998	2.38	0.99	1.91	1.6	269.3	1	5	49.7	5	15	5	0.33	3
CN(C)CCOC(C1=CC=CC=C1)C2=CC=CC=C2C	6.92	4.55	6.55	2	0	1 0	1	3.901	0	8.504	0	6	0.33	1	0	20	0.11	2	0	1.83	2.69	4.17	269.39	0	14	8.87	1	12	8	12.47	ORPHENADRINE CITRATE	1998	3.77	3.9	3.66	3.9	269.4	0	2	12.5	6	18	6	0.33	2
CC1=C(C=NO1)C(=O)NC2=CC=C(C=C2)C(F)(F)F	4.46	4.23	6.23	2	0	0 0	0	2.324	0	6.045	0	2	0.17	2	1	19	0.33	4	1	2.51	2.51	2.51	270.21	0	13.72	0	0	13	6	55.13	LEFLUNOMIDE	1998	2.77	2.32	3.25	2.2	270.2	1	4	55.1	4	12	2	0.17	2
NC(=O)C[S](=O)C(C1=CC=CC=C1)C2=CC=CC=C2	3.45	2.68	4.68	2	0	1 0	1	0.937	41	7.835	0	2	0.13	2	1	19	0.27	3	1	1.53	1.52	1.53	273.35	0	8.84	0	0	16	3	60.16	MODAFINIL	1998	1.62	0.94	2.01	1.2	273.4	1	3	60.2	5	15	2	0.13	2
OC(CC1=CN=CC=C1)([P](O)(O)=O)[P](O)(O)=O		-0.68	0.32	1	0	0 0	0	-2.622	40	5.752	0	2	0.29	8	1	17	1.14	8	5	-6.45	-6.73	-3.32	283.11	4	0.68	4.91	0	10	7	148.18	RISEDRONATE SODIUM	1998	0.21	-2.62	-0.37	-2.2	283.1	5	8	148.2	4	7	2	0.29	1
FC(F)(F)[C@]1(OC(=O)NC2=C1C=C(Cl)C=C2)C#CC3CC3	6.48	7.09	8.09	1	0	1 0	1	3.726	41	7.053	0	5	0.36	1	1	21	0.21	3	1	4.46	4.46	4.46	315.68	0	12.52	0	0	8	11	38.33	EFAVIRENZ	1998	3.98	4.67	4.07	4.3	315.7	1	3	38.3	3	14	5	0.36	1
CN(C)CCCC1(OCC2=C1C=CC(=C2)C#N)C3=CC=C(F)C=C3	5.96	4.11	6.11	2	0	1 0	1	3.132	0	9.284	0	7	0.35	2	0	24	0.15	3	0	0.69	1.41	3.76	324.4	0	14	9.78	1	12	10	36.26	CITALOPRAM HYDROBROMIDE	1998	3.93	3.13	3.81	4.1	324.4	0	3	36.3	6	20	7	0.35	2
CC(C)N(CCC(C1=CC=CC=C1)C2=C(O)C=CC(=C2)C)C(C)C	7.43	6.43	8.43	2	0	1 0	1	5.24	0	10.36	0	10	0.45	1	1	24	0.09	2	1	2.41	2.76	5.12	325.5	0	10.28	11.01	1	12	12	23.47	TOLTERODINE TARTRATE	1998	5.23	5.24	5.34	5.4	325.5	1	2	23.5	7	22	10	0.45	2
CN[S](=O)(=O)CCC1=CC2=C([NH]C=C2C3CCN(C)CC3)C=C1	3.31	2.07	4.07	2	0	0 0	0	1.696	40	9.413	0	9	0.53	2	2	23	0.35	5	2	-1.18	-0.34	1.44	335.47	0	11.55	9.18	1	11	11	65.2	NARATRIPTAN HYDROCHLORIDE	1998	2.13	1.7	2.07	2.5	335.5	2	5	65.2	5	17	9	0.53	2
OC1=C2O[C@H]3C(=O)CC[C@@]4(O)[C@H]5CC(=C2[C@@]34CCN5CC6CC6)C=C1	3.16	1.12	2.12	1	0	4 0	4	0.359	0	9.198	0	13	0.65	3	2	25	0.25	5	2	-0.72	0.13	1.36	341.41	0	10.11	8.88	1	8	17	70	NALTREXONE HYDROCHLORIDE	1998	2.17	0.36	1.53	1.3	341.4	2	5	70	2	20	13	0.65	1
NC1=NC(=C2N=C[N](C3CC(COC(=O)CO)C=C3)C2=N1)NC4CC4	2.32	1.81	3.81	2	0	2 0	2	1.062	0	9.014	0	8	0.5	5	3	25	0.56	9	3	-0.06	0	0.01	344.38	0	13.13	5.77	0	13	12	128.18	ABACAVIR SULFATE	1998	1.05	1.06	0.64	0.28	344.4	3	9	128.2	7	16	8	0.5	2
CCCCCOC(=O)NC1=N[C](=O)[N](C=C1F)C2OC(C)C(O)C2O	2.27	3.26	4.26	1	0	4 0	4	0.841	0	8.436	0	10	0.67	6	3	25	0.6	9	3	0.56	0.15	0.77	359.35	0	6.63	0	0	9	16	122.91	CAPECITABINE	1998	1.3	0.84	0.76	1.1	359.4	3	9	122.9	8	15	10	0.67	1
C[C@]12CC(O)[C@H]3[C@@H](CCC4=CC(=O)C=C[C@]34C)[C@@H]1CC[C@]2(O)C(=O)CO	3.91	2.22	2.22	0	0	7 0	7	1.423	0	9.84	0	15	0.71	5	3	26	0.24	5	3	1.27	1.27	1.27	360.45	0	12.59	0	0	8	18	94.83	PREDNISOLONE	1998	1.61	1.42	1.56	1.7	360.4	3	5	94.8	2	21	15	0.71	0
CC1=CC=C(C=C1)C2=CC(=N[N]2C3=CC=C(C=C3)[S](N)(=O)=O)C(F)(F)F	5.78	5.65	8.65	3	0	0 0	0	4.372	0	9.145	0	2	0.12	3	1	26	0.35	5	1	4.01	4.01	4.01	381.37	0	10.6	0	0	19	6	77.98	CELECOXIB	1998	3.88	4.37	3.51	3.4	381.4	1	5	78	4	17	2	0.12	3
COC1=C(OC)C=C2C(=NC(=NC2=C1)N3CCN(CC3)C(=O)C4CCCO4)N	3.61	2.71	4.71	2	0	1 0	1	2.182	30	10.303	0	10	0.53	4	1	28	0.47	9	1	0.4	0.95	1.18	387.44	0	14	7.24	0	12	16	103.04	TERAZOSIN HYDROCHLORIDE	1998	1.48	2.18	1.06	2	387.4	1	9	103	5	19	10	0.53	2
CCCCC(=O)N(CC1=CC=C(C=C1)C2=CC=CC=C2C3=N[NH]N=N3)C(C(C)C)C(O)=O	5.24	2.65	5.65	3	0	1 0	1	4.869	41	12.202	0	9	0.38	5	0	32	0.33	8	2	3.14	2.29	5.27	435.53	2	4.37	0	0	21	11	112.07	VALSARTAN	1998	3.36	4.87	4.16	5	435.5	2	8	112.1	11	24	9	0.38	3
OC1=CC=C(C=C1)C2=C(C(=O)C3=CC=C(OCCN4CCCCC4)C=C3)C5=C(S2)C=C(O)C=C5	7.17	5.92	9.92	4	0	0 0	0	6.861	0	13.605	0	7	0.25	3	2	34	0.21	5	2	4.54	5.34	5.69	473.59	0	8.89	7.95	1	23	11	70	RALOXIFENE HYDROCHLORIDE	1998	5.48	6.86	6.08	6.4	473.6	2	5	70	7	28	7	0.25	4
CCCC1=N[N](C)C2=C1[NH]C(=N[C]2=O)C3=C(OCC)C=CC(=C3)[S](=O)(=O)N4CCN(C)CC4	3.62	3.78	6.78	3	0	0 0	0	2.218	10	12.585	0	11	0.5	5	1	33	0.5	10	1	1.67	1.44	1.61	474.58	0	7.17	5.96	1	18	14	113.42	SILDENAFIL CITRATE	1998	2.29	2.22	1.61	1.8	474.6	1	10	113.4	7	22	11	0.5	3
CC(C)(O)C1=CC=CC=C1CCC(SCC2(CC2)CC(O)=O)C3=CC=CC(=C3)C=CC4=NC5=C(C=CC(=C5)Cl)C=C4	9.17	6.34	10.34	4	0	1 1	2	8.472	51	17.462	0	11	0.31	4	1	41	0.14	4	2	6.59	5.8	8.49	586.19	1	4.4	3.12	0	26	15	70.42	MONTELUKAST SODIUM	1998	7.05	8.47	8.95	8.3	586.2	2	4	70.4	12	35	11	0.31	4
CCOC1=NC2=C([N]1CC3=CC=C(C=C3)C4=CC=CC=C4C5=NN=N[NH]5)C(=CC=C2)C(=O)OC(C)OC(=O)OC6CCCCC6	7.15	5.69	10.69	5	0	1 0	1	7.084	51	16.461	0	11	0.33	6	0	45	0.36	12	1	6	5.93	7.53	610.67	1	4.23	1.45	0	30	15	143.34	CANDESARTAN CILEXETIL	1998	5.19	7.33	6.32	6.7	610.7	1	12	143.3	13	33	11	0.33	5
CCCCC1=C(C(=O)C2=CC(=C(OCCN(CC)CC)C(=C2)I)I)C3=CC=CC=C3O1	10.69	9.41	12.41	3	0	0 0	0	8.945	51	14.374	0	10	0.4	1	0	31	0.16	4	0	5.68	6.53	7.64	645.32	0	14	8.47	1	17	14	42.68	AMIODARONE HYDROCHLORIDE	1998	6.44	8.95	6.94	7.5	645.3	0	4	42.7	11	25	10	0.4	3
CC(C)CC1N2C(=O)[C@](NC(=O)C3CN(C)[C@@H]4CC5=C(Br)[NH]C6=CC=CC(=C56)C4=C3)(O[C@@]2(O)[C@@H]7CCCN7C1=O)C(C)C	6.6	4.27	6.27	2	0	6 0	6	6.585	0	16.69	0	19	0.59	5	3	43	0.31	10	3	3.47	3.8	3.89	654.61	0	9.69	6.71	1	17	26	118.21	BROMOCRIPTINE MESYLATE	1998	3.81	6.58	3.19	4.8	654.6	3	10	118.2	6	32	19	0.59	2
COC1C=CO[C@@]2(C)OC3=C(C2=O)C4=C(C(=C3C)O)C(=C(NC(=O)C(=CC=CC(C)C(O)C(C)C(O)C(C)C(OC(C)=O)C1C)C)C(=C4O)C=NN5CCN(CC5)C6CCCC6)O	4.97	3.71	5.71	2	0	9 4	13	5.092	0	23.686	40	27	0.57	10	6	63	0.34	16	6	3.41	3.78	3.7	877.04	0	6.99	7.88	1	24	39	220.15	RIFAPENTINE	1998	4.05	5.09	5.65	6	877	6	16	220.1	6	47	27	0.57	2
CNC(C)C(O)C1=CC=CC=C1	4.06	0.11	1.11	1	0	2 0	2	0.888	0	5.066	0	4	0.4	1	2	12	0.2	2	2	-1.5	-0.78	1.32	165.24	0	13.89	9.52	1	6	6	32.26	PSEUDOEPHEDRINE HYDROCHLORIDE	1999	0.93	0.89	1.33	0.94	165.2	2	2	32.3	3	10	4	0.4	1
C[N]1N=NC2=C(N=C[N]2[C]1=O)C(N)=O	-0.85	-0.01	1.99	2	0	0 0	0	-0.811	10	4.507	0	1	0.17	5	1	14	1.33	8	1	-0.28	-0.28	-0.28	194.15	0	10.46	0	0	12	2	108.17	TEMOZOLOMIDE	1999	-1.97	-0.81	-2.08	-1.1	194.2	1	8	108.2	1	6	1	0.17	2
ClCCN(CCCl)[P]1(=O)NCCCO1		1.48	1.48	0	0	1 0	1	0.803	10	5.911	42	7	1	1	1	14	0.57	4	1	0.1	0.1	0.1	261.08	0	13.43	0.08	0	2	12	41.57	CYCLOPHOSPHAMIDE	1999	0.63	0.8	1.88	0.79	261.1	1	4	41.6	5	7	7	1	0
ClC1=CC=CC=C1CN2CCC3=C(C2)C=CS3	7.26	8.29	10.29	2	0	0 0	0	4.388	41	7.547	0	4	0.29	0	0	17	0.14	1	0	3.62	4.07	4.2	263.78	0	14	6.94	1	11	6	3.24	TICLOPIDINE HYDROCHLORIDE	1999	3.85	4.39	3.96	3.3	263.8	0	1	3.2	2	14	4	0.29	2
C[C@]12CC[C@H]3[C@@H](CC(=C)C4=CC(=O)C=C[C@]34C)[C@@H]1CCC2=O	6.29	5.67	5.67	0	0	5 0	5	3.278	0	8.739	40	12	0.6	2	0	22	0.1	2	0	3.87	3.87	3.87	296.41	0	14	0	0	10	12	34.14	EXEMESTANE	1999	2.88	3.28	4.03	2.7	296.4	0	2	34.1	0	20	12	0.6	0
CCN(CC)C(=O)\C(=C\C1=CC(=C(O)C(=C1)O)[N](=O)=O)C#N	3.04	2.18	3.18	1	0	0 1	1	1.761	0	8.014	0	4	0.29	5	2	22	0.57	8	2	0.79	0.1	1.63	305.29	0	5.68	0	0	12	7	130.38	ENTACAPONE	1999	1.65	1.76	1.78	1.6	305.3	2	8	130.4	7	14	4	0.29	1
CCN(C(C)=O)C1=CC=CC(=C1)C2=CC=NC3=C(C=N[N]23)C#N	3.89	3.34	6.34	3	0	0 0	0	1.435	0	8.632	0	3	0.18	4	0	23	0.35	6	0	1.53	1.53	1.53	305.34	0	14	0.28	0	17	4	74.29	ZALEPLON	1999	2.06	1.43	2.64	1.8	305.3	0	6	74.3	5	17	3	0.18	3
CCOC(=O)C1=CC(OC(CC)CC)C(NC(C)=O)C(N)C1	4.28	1.59	1.59	0	0	3 0	3	2.132	0	8.586	0	12	0.75	3	2	22	0.38	6	2	-1.44	-0.72	1.16	312.41	0	14	9.31	1	6	16	90.65	OSELTAMIVIR PHOSPHATE	1999	1.77	2.13	1.29	1.1	312.4	2	6	90.7	9	16	12	0.75	0
CC1=CC2=C(C=C1C(=C)C3=CC=C(C=C3)C(O)=O)C(C)(C)CCC2(C)C	9.61	6.43	8.43	2	0	0 0	0	8.194	51	10.827	0	9	0.38	2	0	26	0.08	2	1	4.54	3.82	6.94	348.49	1	4.07	0	0	16	10	37.3	BEXAROTENE	1999	6.72	8.19	6.1	5.8	348.5	1	2	37.3	3	24	9	0.38	2
CCC1=CN=C(CCOC2=CC=C(CC3SC(=O)NC3=O)C=C2)C=C1	5.3	5.19	7.19	2	0	1 0	1	3.533	0	9.921	0	6	0.32	3	1	25	0.32	5	1	3.27	2.74	3.33	356.44	1	6.66	5.6	0	16	9	68.29	PIOGLITAZONE HYDROCHLORIDE	1999	3.51	3.53	3.16	3.5	356.4	1	5	68.3	7	19	6	0.32	2
CN(CCOC1=CC=C(CC2SC(=O)NC2=O)C=C1)C3=CC=CC=N3	4.63	3.82	5.82	2	0	1 0	1	3.02	0	9.826	0	5	0.28	2	1	25	0.39	6	1	2.56	2.21	2.45	357.43	1	6.84	6.23	1	16	9	71.53	ROSIGLITAZONE MALEATE	1999	2.44	3.02	2.49	3.2	357.4	1	6	71.5	7	18	5	0.28	2
COCCCOC1=C(C)C(=NC=C1)C[S](=O)C2=NC3=CC=CC=C3[NH]2	3.63	3.17	6.17	3	0	1 0	1	2.078	41	9.823	0	6	0.33	4	1	25	0.39	6	1	2.09	2.09	2.09	359.44	0	9.35	4.24	0	17	8	77.1	RABEPRAZOLE SODIUM	1999	2.33	2.08	2.99	2.1	359.4	1	6	77.1	8	18	6	0.33	3
O=C1CCC2=C(N1)C=CC(=C2)OCCCCC3=NN=N[N]3C4CCCCC4	5.6	5.67	7.67	2	0	0 0	0	3.528	10	10.228	0	12	0.6	4	1	27	0.35	7	1	3.31	3.31	3.31	369.47	0	14	0	0	13	14	81.93	CILOSTAZOL	1999	3.24	3.53	3.47	3.3	369.5	1	7	81.9	7	20	12	0.6	2
COC1=C2[N](C=C(C(O)=O)[C](=O)C2=CC(=C1N3C[C@@H]4CCCN[C@@H]4C3)F)C5CC5	2.37	1.54	3.54	2	0	2 0	2	-0.082	0	10.547	0	11	0.52	3	1	29	0.33	7	2	-0.53	-0.49	-0.5	401.44	1	5.69	9.42	1	13	16	83.8	MOXIFLOXACIN HYDROCHLORIDE	1999	-0.45	-0.08	2.37	2.4	401.4	2	7	83.8	4	21	11	0.52	2
CN(CCOC1=CC=C(N[S](C)(=O)=O)C=C1)CCC2=CC=C(N[S](C)(=O)=O)C=C2	2.84	3.03	5.03	2	0	0 0	0	1.994	0	11.451	0	7	0.37	4	0	29	0.53	8	2	-1.9	-1.05	0.24	441.56	2	10.15	8.99	1	16	11	104.81	DOFETILIDE	1999	2.1	1.99	1.98	1.9	441.6	2	8	104.8	11	19	7	0.37	2
CC(=O)N1CCN(CC1)C2=CC=C(OCC3COC(C[N]4C=CN=C4)(O3)C5=CC=C(Cl)C=C5Cl)C=C2	5.63	5.12	8.12	3	0	2 0	2	3.635	30	13.892	0	10	0.38	4	0	36	0.31	8	0	4.01	4.16	4.19	531.43	0	14	6.42	0	19	17	69.06	KETOCONAZOLE	1999	4.34	3.64	4.21	4	531.4	0	8	69.1	8	26	10	0.38	3
COC1C[C@@H](CCC1O)CC(C)[C@@H]2CC(=O)C(C)C=C(C)C(O)C(OC)C(=O)C(C)CC(C)C=CC=CC=C(C)C(C[C@@H]3CCC(C)[C@@](O)(O3)C(=O)C(=O)N4CCCC[C@H]4C(=O)O2)OC	8.9	7.23	7.23	0	0	15 4	19	7.039	40	24.792	0	38	0.75	12	3	65	0.27	14	3	7.45	7.45	7.45	914.19	0	9.96	0	0	18	47	195.43	SIROLIMUS	1999	3.88	7.04	6.18	5.9	914.2	3	14	195.4	6	51	38	0.75	0
C[N]1C=C[NH][C]1=S	2.52	0.08	1.08	1	0	0 0	0	-0.34	0	3.44	0	1	0.25	1	1	7	0.75	2	1	0.75	0.75	0.75	114.17	0	10.41	0	0	6	1	20.72	METHIMAZOLE	2000	-0.34	-0.34	1.08	-0.12	114.2	1	2	20.7	0	4	1	0.25	1
NCCCCCC(O)=O	0.08	-1.15	-1.15	0	0	0 0	0	-2.235	0	3.518	0	5	0.83	2	1	9	0.5	3	2	-2	-2	-2	131.18	1	4.73	10.21	1	2	7	63.32	AMINOCAPROIC ACID	2000	-2.95	-2.24	0.59	0.16	131.2	2	3	63.3	5	6	5	0.83	0
CCC(N1CCCC1=O)C(N)=O	1.82	-0.28	-0.28	0	0	1 0	1	-0.344	0	4.519	0	6	0.75	2	1	12	0.5	4	1	-0.59	-0.59	-0.59	170.21	0	14	0	0	4	8	63.4	LEVETIRACETAM	2000	-0.49	-0.34	-0.13	-0.48	170.2	1	4	63.4	3	8	6	0.75	0
CC1O[C@@]2(CS1)CN3CCC2CC3	4.53	0.41	0.41	0	0	2 0	2	1.141	30	5.611	0	10	1	1	0	13	0.3	2	0	-1.08	-0.22	1	199.31	0	14	8.59	1	0	13	12.47	CEVIMELINE HYDROCHLORIDE	2000	1.7	1.14	1.56	1.9	199.3	0	2	12.5	0	10	10	1	0
N[S](=O)(=O)CC1=NOC2=CC=CC=C12	1.16	1.99	3.99	2	0	0 0	0	-0.363	41	5.084	0	1	0.13	3	1	14	0.75	5	1	0.11	0.11	0.11	212.22	0	9.84	0	0	11	2	86.19	ZONISAMIDE	2000	0.98	-0.36	0.62	-0.08	212.2	1	5	86.2	2	8	1	0.13	2
CCN(C)C(=O)OC1=CC=CC(=C1)C(C)N(C)C	5.02	2.29	3.29	1	0	1 0	1	2.099	0	7.325	0	7	0.5	1	0	18	0.29	4	0	0.13	1	2.41	250.34	0	14	8.8	1	8	10	32.78	RIVASTIGMINE TARTRATE	2000	2.37	2.1	2.76	2.8	250.3	0	4	32.8	6	14	7	0.5	1
NC(=O)N1C2=CC=CC=C2CC(=O)C3=CC=CC=C13	3.59	3.36	5.36	2	0	0 0	0	1.206	41	7.223	0	1	0.07	2	1	19	0.27	4	1	1.82	1.82	1.82	252.27	0	13.18	0	0	16	3	63.4	OXCARBAZEPINE	2000	1.89	1.21	2.64	1.7	252.3	1	4	63.4	1	15	1	0.07	2
CN1CC[C@]23CCCC[C@H]2C1CC4=C3C=C(O)C=C4	6	3.29	4.29	1	0	3 0	3	3.529	0	7.78	0	11	0.65	1	1	19	0.12	2	1	0.23	0.93	2.9	257.38	0	10.46	9.66	1	6	13	23.47	LEVORPHANOL TARTRATE	2000	2.82	3.53	3.08	3	257.4	1	2	23.5	0	17	11	0.65	1
CC(C)NCC(O)C1=CC=C(N[S](C)(=O)=O)C=C1	2.15	-0.14	0.86	1	0	1 0	1	0.226	0	7.234	0	6	0.5	3	2	18	0.5	5	3	-2.82	-2.12	-0.4	272.36	1	10.07	9.43	1	8	9	78.43	SOTALOL HYDROCHLORIDE	2000	1	0.23	1.09	0.43	272.4	3	5	78.4	6	12	6	0.5	1
CCN(CC)C(=S)SSC(=S)N(CC)CC	6.78	9.04	9.04	0	0	0 0	0	3.88	0	8.949	0	8	0.8	2	0	16	0.6	2	0	4.16	4.16	4.16	296.52	0	14	0	0	4	12	6.48	DISULFIRAM	2000	2.6	3.88	3.62	3.8	296.5	0	2	6.5	9	10	8	0.8	0
CC(C)[C@@H]1CC[C@H](CC1)C(O)=N[C@H](CC2=CC=CC=C2)C(O)=O	6.47	4.33	5.33	1	0	1 1	2	4.857	59	9.074	0	11	0.58	4	1	23	0.21	4	2	1.81	0.29	4.85	317.43	1	4.06	1.53	0	10	13	69.89	NATEGLINIDE	2000	4.33	4.86	4.1	5.2	317.4	2	4	69.9	6	19	11	0.58	1
COCCCC\C(=N/OCCN)C1=CC=C(C=C1)C(F)(F)F	5.82	3.66	4.66	1	0	0 1	1	3.025	10	8.08	0	8	0.53	3	1	22	0.27	4	1	0.51	1.33	2.8	318.34	0	14	8.86	1	8	14	56.84	FLUVOXAMINE MALEATE	2000	2.71	3.32	3.2	3.1	318.3	1	4	56.8	10	15	8	0.53	1
CC(=O)NCC1CN(C(=O)O1)C2=CC(=C(C=C2)N3CCOCC3)F	2.86	2.04	3.04	1	0	1 0	1	0.168	20	8.471	0	8	0.5	3	1	24	0.44	7	1	0.64	0.64	0.64	337.35	0	14	0	0	10	14	71.11	LINEZOLID	2000	1.31	0.17	1.12	1.1	337.3	1	7	71.1	5	16	8	0.5	1
CCCNCC(O)COC1=CC=CC=C1C(=O)CCC2=CC=CC=C2	6.29	3.3	5.3	2	0	1 0	1	3.636	0	10.085	0	8	0.38	2	2	25	0.19	4	2	0.65	1.34	3.54	341.45	0	14	9.63	1	14	11	58.56	PROPAFENONE HYDROCHLORIDE	2000	3.34	3.64	3.24	3.3	341.4	2	4	58.6	11	21	8	0.38	2
CC(C)NC(=O)N[S](=O)(=O)C1=C(NC2=CC=CC(=C2)C)C=CN=C1	3.87	2.64	4.64	2	0	0 0	0	3.208	0	9.322	0	4	0.25	4	3	24	0.5	7	3	1.44	1.12	1.86	348.42	1	5.92	4.2	0	16	7	100.19	TORSEMIDE	2000	2.19	3.36	2.53	2.9	348.4	3	7	100.2	7	16	4	0.25	2
CN1C(=C(O)C2=C(C=CC=C2)[S]1(=O)=O)C(=O)NC3=NC=C(C)S3	3.6	1.38	3.38	2	0	0 0	0	2.292	40	8.561	40	2	0.14	5	2	23	0.64	7	2	-0.37	-0.98	1.6	351.4	0	4.47	0.47	0	17	5	99.6	MELOXICAM	2000	3.01	2.29	1.95	2.6	351.4	2	7	99.6	3	14	2	0.14	2
OC(=O)CCNC(=O)C1=CC=C(C=C1)N=NC2=CC=C(O)C(=C2)C(O)=O	2.53	-0.15	1.85	2	0	0 1	1	3.315	0	9.47	0	2	0.12	8	2	26	0.53	9	4	-2.74	-3.62	3.17	357.32	2	3.06	0	0	20	6	148.65	BALSALAZIDE DISODIUM	2000	2.16	3.21	2.71	2.2	357.3	4	9	148.6	8	17	2	0.12	2
COC1=C(OC)C(=NC=C1)C[S](=O)C2=NC3=C([NH]2)C=C(OC(F)F)C=C3	3.09	2.87	5.87	3	0	1 0	1	2.111	41	9.08	0	4	0.25	3	1	26	0.5	7	1	2.17	2.17	2.18	383.37	0	9.15	3.55	0	17	9	86.33	PANTOPRAZOLE SODIUM	2000	1.6	2.11	2.88	1.6	383.4	1	7	86.3	7	16	4	0.25	3
CCOC1=C(C=CC(=C1)CC(=O)NC(CC(C)C)C2=CC=CC=C2N3CCCCC3)C(O)=O	6.64	5.1	7.1	2	0	1 0	1	5.303	41	13.094	0	13	0.48	3	1	33	0.22	6	2	2.53	1.95	3.95	452.6	1	3.68	4.82	0	16	17	78.87	REPAGLINIDE	2000	4.67	5.3	5.22	5.8	452.6	2	6	78.9	11	27	13	0.48	2
FC1=CC=C(C=C1)C(CCCN2CCC(CC2)[N]3[C](=O)[NH]C4=CC=CC=C34)C5=CC=C(F)C=C5	7.73	7.67	11.67	4	0	0 0	0	6.401	0	13.227	0	9	0.32	1	1	34	0.14	4	1	3.95	4.8	5.83	461.56	0	12.9	8.38	1	22	12	41.03	PIMOZIDE	2000	5.63	6.4	5.86	6	461.5	1	4	41	7	28	9	0.32	4
CCCC1=NC2=C(C=C(C=C2C)C3=NC4=CC=CC=C4[N]3C)[N]1CC5=CC=C(C=C5)C6=CC=CC=C6C(O)=O	8.25	5.68	11.68	6	0	0 0	0	7.293	51	15.47	0	6	0.18	4	0	39	0.18	6	1	5.57	4.86	6.13	514.63	1	3.62	5.86	0	32	7	72.94	TELMISARTAN	2000	5.78	7.54	7.26	7.7	514.6	1	6	72.9	7	33	6	0.18	6
CCC(CO)NCCNC(CC)CO	3.18	-0.14	-0.14	0	0	2 0	2	0.119	0	5.859	0	10	1	2	4	14	0.4	4	4	-3.28	-2.25	-0.06	204.31	0	14	9.55	1	0	14	64.52	ETHAMBUTOL HYDROCHLORIDE	2001	0.15	0.12	-0.29	-0.38	204.3	4	4	64.5	9	10	10	1	0
CC(C)(C)NCC(O)C1=CC(=CC(=C1)O)O	2.08	-1.08	-0.08	1	0	1 0	1	0.482	0	6.299	0	6	0.5	3	4	16	0.33	4	4	-1.45	-0.73	0.44	225.29	0	8.86	9.76	1	6	10	72.72	TERBUTALINE SULFATE	2001	0.08	0.48	1.52	0.93	225.3	4	4	72.7	4	12	6	0.5	1
COC1=CC2=C(C=C1)C=C(CCC(C)=O)C=C2	5.9	5.17	7.17	2	0	0 0	0	2.982	0	6.884	0	4	0.27	1	0	17	0.13	2	0	3.22	3.22	3.22	228.29	0	14	0	0	12	5	26.3	NABUMETONE	2001	3.08	2.98	3.37	3	228.3	0	2	26.3	4	15	4	0.27	2
CNC1CCC2=C(C1)C3=C([NH]2)C=CC(=C3)C(N)=O	2.17	0.14	2.14	2	0	1 0	1	0.718	0	7.185	0	5	0.36	1	3	18	0.29	4	3	-2.08	-1.74	1.08	243.31	0	14	10.42	1	11	7	70.91	FROVATRIPTAN SUCCINATE	2001	1.41	0.72	1.34	1.3	243.3	3	4	70.9	2	14	5	0.36	2
CC(C)C(=O)NC1=CC(=C(C=C1)[N](=O)=O)C(F)(F)F	5.18	5.24	6.24	1	0	0 0	0	3.335	0	6.07	0	4	0.36	2	1	19	0.45	5	1	3.27	3.27	3.27	276.21	0	13.17	0	0	10	8	74.92	FLUTAMIDE	2001	3.35	3.33	3.21	3	276.2	1	5	74.9	5	11	4	0.36	1
COC1=C2O[C@H]3CC(O)C=C[C@]34CCN(C)CC(=C24)C=C1	3.82	0.71	1.71	1	0	3 0	3	1.025	0	8.061	0	9	0.53	1	1	21	0.24	4	1	-0.9	-0.04	1.16	287.36	0	14	8.58	1	8	13	41.93	GALANTAMINE HYDROBROMIDE	2001	1.07	1.02	1.85	1.8	287.4	1	4	41.9	1	17	9	0.53	1
ClC1=CC2=C(C=C1)C(=C3CCNCC3)C4=C(CC2)C=CC=N4	6.18	3.62	5.62	2	0	0 0	0	3.826	0	9.255	0	6	0.32	1	1	22	0.11	2	1	1.03	1.69	3.97	310.83	0	14	9.73	1	14	8	24.92	DESLORATADINE	2001	3.45	3.83	4.02	4.1	310.8	1	2	24.9	0	19	6	0.32	2
CN(C)CCC1=C[NH]C2=C1C=C(C[S](=O)(=O)N3CCCC3)C=C2	3.84	2.07	4.07	2	0	0 0	0	1.793	41	9.413	0	9	0.53	2	1	23	0.35	5	1	-1.39	-0.61	1.52	335.47	0	14	9.55	1	11	11	56.41	ALMOTRIPTAN MALATE	2001	2.23	1.79	2.2	1.8	335.5	1	5	56.4	6	17	9	0.53	2
COC1=CC2=C([NH]C(=N2)[S@@](=O)CC3=NC=C(C)C(=C3C)OC)C=C1	3.9	4.06	7.06	3	0	1 0	1	2.565	41	9.36	0	5	0.29	3	1	24	0.41	6	1	2.43	2.43	2.43	345.42	0	9.68	4.77	0	17	7	77.1	ESOMEPRAZOLE MAGNESIUM	2001	2.25	2.57	2.9	2.2	345.4	1	6	77.1	5	17	5	0.29	3
CC(C)C(N)C(=O)OCC(CO)OC[N]1C=NC2=C1[NH]C(=N[C]2=O)N	-0.6	1.27	3.27	2	0	2 0	2	-1.78	10	8.793	0	8	0.57	6	4	25	0.79	11	4	-1.71	-1.12	-1.08	354.37	0	8.1	7.36	1	12	13	171.37	VALGANCICLOVIR HYDROCHLORIDE	2001	-1.05	-2.18	-1.44	-2.1	354.4	4	11	171.4	9	14	8	0.57	2
O=C1CC2(CCCC2)CC(=O)N1CCCCN3CCN(CC3)C4=NC=CC=N4	4.6	3.95	4.95	1	0	0 0	0	2.185	10	10.796	0	15	0.71	4	0	28	0.33	7	0	0.63	1.35	1.78	385.51	0	14	7.62	1	10	18	69.64	BUSPIRONE HYDROCHLORIDE	2001	2.25	2.19	2.09	2	385.5	0	7	69.6	6	21	15	0.71	1
COC1=CC(=CC(=C1OC)OC)C(=O)NCC2=CC=C(OCCN(C)C)C=C2	4.41	2.62	4.62	2	0	0 0	0	2.332	30	10.76	0	8	0.38	1	1	28	0.33	7	1	-0.09	0.77	2.16	388.46	0	14	8.77	1	14	14	69.26	TRIMETHOBENZAMIDE HYDROCHLORIDE	2001	2.08	2.33	2.58	2.1	388.5	1	7	69.3	11	21	8	0.38	2
CCC(C)C(=O)OC1CC(C)C=C2C=CC(C)C(CCC3CC(O)CC(=O)O3)[C@@H]12	6.86	7.81	7.81	0	0	8 0	8	4.082	0	11.256	0	18	0.75	3	1	29	0.21	5	1	3.9	3.9	3.9	404.55	0	14	0	0	8	21	72.83	LOVASTATIN	2001	4.26	4.08	4.2	4.4	404.5	1	5	72.8	7	24	18	0.75	0
ClC1=C(CCN2CCN(CC2)C3=NSC4=CC=CC=C34)C=C5CC(=O)NC5=C1	5.94	6.19	9.19	3	0	0 0	0	4.21	0	11.475	0	7	0.33	2	1	28	0.29	5	1	3.62	4.13	4.3	412.94	0	12.21	7.09	1	17	11	48.47	ZIPRASIDONE HYDROCHLORIDE	2001	3.72	4.21	3.81	3.8	412.9	1	5	48.5	4	21	7	0.33	3
CCCC1OC2C[C@H]3[C@@H]4CCC5=CC(=O)C=C[C@]5(C)[C@H]4C(O)C[C@]3(C)[C@@]2(O1)C(=O)CO	5.06	4.53	4.53	0	0	9 0	9	2.905	0	11.67	0	19	0.76	6	2	31	0.24	6	2	2.73	2.73	2.73	430.54	0	13.78	0	0	8	23	93.06	BUDESONIDE	2001	3.03	2.9	2.72	3	430.5	2	6	93.1	4	25	19	0.76	0
CN1CCN(CC1)CC2=CC=C(C=C2)C(=O)NC3=CC(=C(C)C=C3)NC4=NC=CC(=N4)C5=CN=CC=C5	4.94	3.23	7.23	4	0	0 0	0	4.379	0	14.632	0	7	0.24	4	2	37	0.28	8	2	3.02	3.8	4.38	493.62	0	12.69	7.84	1	26	11	86.28	IMATINIB MESYLATE	2001	3.57	4.53	4.59	4.4	493.6	2	8	86.3	8	29	7	0.24	4
CC(C)OC(=O)OCO[P](=O)(CO[C@H](C)C[N]1C=NC2=C(N)N=CN=C12)OCOC(=O)OC(C)C		3.96	5.96	2	0	1 0	1	0.801	0	11.969	0	12	0.63	10	1	35	0.79	15	1	2.65	2.65	2.65	519.45	0	14	3.72	0	15	20	185.44	TENOFOVIR DISOPROXIL FUMARATE	2001	2.03	0.8	3.04	-0.95	519.4	1	15	185.4	17	19	12	0.63	2
COC1=CC=CC=C1OC2=C(N[S](=O)(=O)C3=CC=C(C=C3)C(C)(C)C)N=C(N=C2OCCO)C4=NC=CC=N4	4.71	3.85	7.85	4	0	0 0	0	4.167	0	14.478	0	7	0.26	8	1	39	0.44	11	2	4.32	3.98	4.94	551.62	1	5.8	0	0	26	12	145.65	BOSENTAN	2001	4.3	4.17	4.2	3.9	551.6	2	11	145.6	11	27	7	0.26	4
COC1=CC(=CC(=C1O)OC)C2[C@@H]3[C@H](COC3=O)C(OC4O[C@@H]5COC(C)O[C@H]5C(O)C4O)C6=CC7=C(OCO7)C=C26	2.04	3.13	5.13	2	0	10 0	10	-0.112	0	14.07	0	16	0.55	8	3	42	0.45	13	3	1.16	1.16	1.16	588.56	0	9.33	0	0	14	28	160.83	ETOPOSIDE	2001	0.6	0.03	1.34	-0.43	588.6	3	13	160.8	5	29	16	0.55	2
OCCCC(O)=O	-0.14	-0.81	-0.81	0	0	0 0	0	-0.581	0	2.374	0	3	0.75	3	1	7	0.75	3	2	-2.56	-3.37	-0.51	104.11	1	4.44	0	0	2	5	57.53	SODIUM OXYBATE	2002	-0.83	-0.58	-0.16	-0.47	104.1	2	3	57.5	3	4	3	0.75	0
CN(C)C(=N)NC(N)=N	0.29	-0.22	-0.22	0	0	0 0	0	-1.428	0	3.521	0	2	0.5	0	4	9	1.25	5	4	-5.73	-5.62	-0.92	129.17	0	14	12.33	1	4	5	88.99	METFORMIN HYDROCHLORIDE	2002	-0.36	-1.63	-1.03	-2	129.2	4	5	89	3	4	2	0.5	0
O[S](=O)(=O)CCS	0.43	-1.54	-1.54	0	0	0 0	0	-1.554	0	2.937	42	2	1	3	1	7	2	3	1	-2.78	-2.78	-0.4	142.19	1	-1.16	0	0	2	4	54.37	MESNA	2002	-0.57	-1.55	-0.2	-0.71	142.2	1	3	54.4	2	2	2	1	0
CNCCC(OC1=CC=CC=C1C)C2=CC=CC=C2	6.86	4.88	6.88	2	0	1 0	1	3.937	41	8.041	0	5	0.29	0	1	19	0.12	2	1	0.84	1.46	3.81	255.36	0	14	9.8	1	12	7	21.26	ATOMOXETINE HYDROCHLORIDE	2002	4.15	3.94	3.73	3.6	255.4	1	2	21.3	6	17	5	0.29	2
CN(C)CCC(C1=CC=C(Cl)C=C1)C2=CC=CC=N2	6.02	3.56	5.56	2	0	1 0	1	3.148	0	8.168	0	5	0.31	1	0	19	0.12	2	0	0.72	1.52	3.58	274.79	0	14	9.47	1	12	7	16.13	CHLORPHENIRAMINE MALEATE	2002	3.17	3.15	3.82	3.3	274.8	0	2	16.1	5	16	5	0.31	2
CC(=O)OC1=CC=CC=C1C(=O)NC2=NC=C(S2)[N](=O)=O	2.56	3.77	5.77	2	0	0 0	0	1.243	0	7.394	0	1	0.08	4	1	21	0.75	8	1	2.12	2.12	2.12	307.28	0	13.47	0	0	17	3	114.11	NITAZOXANIDE	2002	2.32	1.24	2.23	2.2	307.3	1	8	114.1	6	12	1	0.08	2
CCCCCN(C)CCC(O)([P](O)(O)=O)[P](O)(O)=O		-0.35	-0.35	0	0	0 0	0	-3.373	40	7.067	0	9	1	7	1	19	0.89	8	5	-4.58	-4.86	-2.48	319.23	4	0.66	9.93	1	4	15	138.53	IBANDRONATE SODIUM	2002	1.07	-3.37	0.5	-0.58	319.2	5	8	138.5	9	9	9	1	0
CN(C)CCC[C@]1(OCC2=C1C=CC(=C2)C#N)C3=CC=C(F)C=C3	5.96	4.11	6.11	2	0	1 0	1	3.132	0	9.284	0	7	0.35	2	0	24	0.15	3	0	0.69	1.41	3.76	324.4	0	14	9.78	1	12	10	36.26	ESCITALOPRAM OXALATE	2002	3.93	3.13	3.81	4.1	324.4	0	3	36.3	6	20	7	0.35	2
CC1=NC=C2CN=C(C3=CC=CC=C3F)C4=C(C=CC(=C4)Cl)[N]12	5.9	5.9	8.9	3	0	0 0	0	3.422	41	9.067	0	2	0.11	2	0	23	0.17	3	0	3.82	3.95	3.97	325.77	0	14	6.19	0	19	4	30.18	MIDAZOLAM HYDROCHLORIDE	2002	3.27	3.42	4.32	3.1	325.8	0	3	30.2	1	18	2	0.11	3
CC(C1=NC=NC=C1F)[C@](O)(C[N]2C=NC=N2)C3=C(F)C=C(F)C=C3	3.04	3.84	6.84	3	0	2 0	2	0.523	0	8.351	0	4	0.25	5	1	25	0.38	6	1	1.82	1.82	1.82	349.32	0	12.7	2.01	0	17	8	76.72	VORICONAZOLE	2002	2.54	0.52	2.18	1.5	349.3	1	6	76.7	5	16	4	0.25	3
CC(C)OC(=O)C(C)(C)OC1=CC=C(C=C1)C(=O)C2=CC=C(Cl)C=C2	7.4	8.32	10.32	2	0	0 0	0	5.233	0	9.779	0	6	0.3	2	0	25	0.2	4	0	5.28	5.28	5.28	360.83	0	14	0	0	16	9	52.6	FENOFIBRATE	2002	4.68	5.23	4.68	5.1	360.8	0	4	52.6	7	20	6	0.3	2
C[C@]12CC(O)[C@@]3(F)[C@@H](CCC4=CC(=O)CC[C@]34C)[C@@H]1CC[C@]2(O)C(=O)CO	4.31	2.45	2.45	0	0	7 0	7	1.73	10	9.804	0	17	0.81	5	3	27	0.24	5	3	1.32	1.32	1.32	380.46	0	12.55	0	0	6	21	94.83	FLUDROCORTISONE ACETATE	2002	1.67	1.54	1.87	1.2	380.5	3	5	94.8	2	21	17	0.81	0
CN1CCCC1CC2=C[NH]C3=C2C=C(CC[S](=O)(=O)C4=CC=CC=C4)C=C3	5.21	5.71	8.71	3	0	1 0	1	3.355	0	11.092	0	8	0.36	2	1	27	0.23	4	1	1.9	2.76	3.77	382.52	0	14	8.37	1	17	9	53.17	ELETRIPTAN HYDROBROMIDE	2002	3.57	3.35	3.82	3.7	382.5	1	4	53.2	6	22	8	0.36	3
OC(CCC1C(N(C1=O)C2=CC=C(F)C=C2)C3=CC=C(O)C=C3)C4=CC=C(F)C=C4	5.59	5.79	8.79	3	0	3 0	3	3.958	10	11.058	0	5	0.21	3	2	30	0.17	4	2	4.56	4.56	4.56	409.43	0	9.48	0	0	20	10	60.77	EZETIMIBE	2002	4.05	3.96	4.89	3.8	409.4	2	4	60.8	6	24	5	0.21	3
COC(=O)C1CC2=CC(=O)CC[C@]2(C)[C@@]34OC3C[C@@]5(C)[C@@H](CC[C@@]56CCC(=O)O6)[C@H]14	3.92	4.6	4.6	0	0	8 0	8	0.475	10	10.861	0	19	0.79	4	0	30	0.25	6	0	2.33	2.33	2.33	414.5	0	14	0	0	8	22	82.2	EPLERENONE	2002	1.54	0.28	3.13	1.6	414.5	0	6	82.2	2	24	19	0.79	0
CCCC1=NC(=C([N]1CC2=CC=C(C=C2)C3=C(C=CC=C3)C4=NN=N[NH]4)C(O)=O)C(C)(C)O	3.3	1.85	5.85	4	0	0 0	0	2.5	0	12.289	0	7	0.29	6	1	33	0.38	9	3	0.19	-0.69	2.37	446.51	2	1.83	5.35	0	24	9	129.81	OLMESARTAN MEDOXOMIL	2002	3.19	2.75	3.66	4.8	446.5	3	9	129.8	8	24	7	0.29	4
ClC1=CC=CC(=C1Cl)N2CCN(CCCCOC3=CC4=C(CCC(=O)N4)C=C3)CC2	6.92	7.05	9.05	2	0	0 0	0	5.312	0	12.225	0	10	0.43	1	1	30	0.22	5	1	3.9	4.57	4.9	448.39	0	13.51	7.46	1	14	16	44.81	ARIPIPRAZOLE	2002	4.26	5.31	4.86	5.2	448.4	1	5	44.8	7	23	10	0.43	2
CC(C)(C)C(=O)OCO[P](=O)(COCC[N]1C=NC2=C(N)N=CN=C12)OCOC(=O)C(C)(C)C		4.7	6.7	2	0	0 0	0	1.398	0	12.126	0	13	0.65	8	1	34	0.65	13	1	3.06	3.06	3.06	501.48	0	14	3.73	0	15	19	166.98	ADEFOVIR DIPIVOXIL	2002	2.38	1.4	2.7	0.75	501.5	1	13	167	15	20	13	0.65	2
CC12CC3CC(C)(C1)CC(N)(C3)C2	6.07	1.9	1.9	0	0	2 0	2	3.033	0	5.58	0	12	1	0	1	13	0.08	1	1	-0.94	-0.78	2.07	179.31	0	14	10.7	1	0	13	26.02	MEMANTINE HYDROCHLORIDE	2003	3.28	3.03	2.69	3.1	179.3	1	1	26	0	12	12	1	0
COC1=CC=CC=C1OCC(O)CO	2.63	0.88	1.88	1	0	1 0	1	0.102	0	5.156	0	4	0.4	2	2	14	0.4	4	2	0.34	0.34	0.34	198.22	0	13.67	0	0	6	8	58.92	GUAIFENESIN	2003	0.62	0.1	0.43	0.35	198.2	2	4	58.9	5	10	4	0.4	1
CCCNC1CCC2=C(C1)SC(=N2)N	3.94	0.77	1.77	1	0	1 0	1	1.168	0	6.093	0	7	0.7	1	2	14	0.4	3	2	-1.38	-0.98	1.76	211.33	0	14	10.31	1	5	9	50.94	PRAMIPEXOLE DIHYDROCHLORIDE	2003	1.68	1.17	1.58	1.6	211.3	2	3	50.9	3	10	7	0.7	1
CCCCN1CC(O)C(O)C(O)C1CO	2.34	-0.47	-0.47	0	0	4 0	4	0.906	0	5.619	0	10	1	4	4	15	0.5	5	4	-3.16	-2.3	-1.18	219.28	0	12.91	8.49	1	0	15	84.16	MIGLUSTAT	2003	-0.27	0.91	-1.45	-0.89	219.3	4	5	84.2	4	10	10	1	0
NC1=N[C](=O)[N](C=C1F)C2CSC(CO)O2	0.28	-0.14	0.86	1	0	2 0	2	-1.291	30	5.654	0	4	0.5	4	2	16	0.88	6	2	-0.9	-0.9	-0.9	247.24	0	14	0	0	7	9	90.37	EMTRICITABINE	2003	-0.89	-1.29	-0.46	-1.1	247.2	2	6	90.4	2	8	4	0.5	1
NC1=NC2=C(N=C[N]2COC(CO)CO)[C](=O)[NH]1	-1.75	-0.77	1.23	2	0	0 0	0	-2.145	0	6.069	0	4	0.44	6	4	18	1	9	4	-2.18	-2.18	-2.18	255.23	0	10.16	0.49	0	10	8	139.28	GANCICLOVIR	2003	-2.07	-2.54	-1.97	-2.6	255.2	4	9	139.3	5	9	4	0.44	2
O=C1CCC(N2C(=O)C3=CC=CC=C3C2=O)C(=O)N1	2.02	0.66	1.66	1	0	1 0	1	0.528	20	6.461	0	3	0.23	4	1	19	0.46	6	1	0.02	0.02	0.02	258.23	0	11.59	0	0	14	5	83.55	THALIDOMIDE	2003	0.33	0.53	0.09	0.87	258.2	1	6	83.6	1	13	3	0.23	1
CN1CCC(CC1)=C2C3=CC=CC=C3C=CC4=CC=CC=C24	8.05	5.97	7.97	2	0	0 0	0	5.302	0	9.413	0	5	0.24	0	0	22	0.05	1	0	2.83	3.65	4.38	287.41	0	14	8.05	1	16	6	3.24	CYPROHEPTADINE HYDROCHLORIDE	2003	4.25	5.3	4.7	4.8	287.4	0	1	3.2	0	21	5	0.24	2
CN(C)CCOC(C1=CC=C(Cl)C=C1)C2=CC=CC=N2	5.44	4.39	6.39	2	0	1 0	1	2.668	0	8.321	0	5	0.31	2	0	20	0.19	3	0	0.93	1.79	3.27	290.79	0	14	8.87	1	12	8	25.36	CARBINOXAMINE MALEATE	2003	3.15	2.67	3.4	3	290.8	0	3	25.4	6	16	5	0.31	2
CN[S](=O)(=O)CC1=CC2=C([NH]C=C2CCN(C)C)C=C1	2.47	1.06	3.06	2	0	0 0	0	0.743	41	8.199	0	6	0.43	2	2	20	0.43	5	2	-2.02	-1.24	0.74	295.4	0	11.24	9.54	1	11	8	65.2	SUMATRIPTAN SUCCINATE	2003	0.93	0.74	1.32	1.5	295.4	2	5	65.2	6	14	6	0.43	2
CC1=C(\C=C\C(C)=C\C=C\C(C)=C/C(O)=O)C(C)(C)CCC1	8.75	6.2	6.2	0	0	0 4	4	6.744	0	10.098	0	9	0.45	2	0	22	0.1	2	1	3.5	2.64	5.01	300.44	1	5	0	0	12	10	37.3	ISOTRETINOIN	2003	4.59	6.74	5.6	6.6	300.4	1	2	37.3	5	20	9	0.45	0
CC(C)NCC(O)COC1=CC=C(CCOCC2CC2)C=C1	5.32	2.77	3.77	1	0	1 0	1	2.319	0	8.945	0	12	0.67	2	2	22	0.22	4	2	-0.36	0.31	2.54	307.43	0	14	9.67	1	6	16	50.72	BETAXOLOL HYDROCHLORIDE	2003	2.81	2.32	2.39	2.6	307.4	2	4	50.7	11	18	12	0.67	1
CN1CCN(CC1)C2=NC3=CC=CC=C3NC4=C2C=C(C)S4	4.61	4.08	6.08	2	0	0 0	0	2.859	30	9.198	0	6	0.35	0	1	22	0.29	4	1	2.57	3.16	3.39	312.44	0	14	7.24	1	13	9	30.87	OLANZAPINE	2003	2.6	3.01	3.44	3.5	312.4	1	4	30.9	1	17	6	0.35	2
CC[C@]12CC[C@H]3[C@@H](CCC4=CC(=O)CC[C@H]34)[C@@H]1CC[C@@]2(O)C#C	6.37	5.44	5.44	0	0	6 0	6	3.319	10	9.244	0	16	0.76	2	1	23	0.1	2	1	3.66	3.66	3.66	312.45	0	14	0	0	4	17	37.3	LEVONORGESTREL	2003	3.32	3.31	3.88	3.5	312.4	1	2	37.3	2	21	16	0.76	0
CC(=O)C1CC[C@H]2[C@@H]3CCC4=CC(=O)CC[C@]4(C)[C@H]3CC[C@]12C	7.09	7.45	7.45	0	0	6 0	6	3.965	10	9.33	0	17	0.81	2	0	23	0.1	2	0	4.15	4.15	4.15	314.47	0	14	0	0	6	17	34.14	PROGESTERONE	2003	3.87	3.77	4.72	3.5	314.5	0	2	34.1	1	21	17	0.81	0
OC(C1CCCCN1)C2=CC(=NC3=C2C=CC=C3C(F)(F)F)C(F)(F)F	6.02	3.88	5.88	2	0	2 0	2	3.669	0	8.313	0	8	0.47	2	2	26	0.18	3	2	1.33	2.07	4.11	378.32	0	13.79	9.46	1	10	16	45.15	MEFLOQUINE HYDROCHLORIDE	2003	3.56	3.67	4.45	3.5	378.3	2	3	45.2	4	17	8	0.47	2
CO\N=C1/CN(CC1CN)C2=NC3=C(C=C2F)[C](=O)C(=C[N]3C4CC4)C(O)=O	1.21	1.01	3.01	2	0	1 1	2	-1.245	30	9.929	0	8	0.44	5	1	28	0.5	9	2	-0.94	-0.91	-0.91	389.39	1	5.53	9.23	2	15	13	123.04	GEMIFLOXACIN MESYLATE	2003	-1.12	-1.25	0.97	1.7	389.4	2	9	123	5	18	8	0.44	2
CN1CC(=O)N2[C@H](CC3=C([NH]C4=CC=CC=C34)C2C5=CC6=C(OCO6)C=C5)C1=O	3.61	3.89	6.89	3	0	2 0	2	2.584	41	10.611	0	6	0.27	2	1	29	0.32	7	1	1.64	1.64	1.64	389.41	0	14	0	0	19	10	74.87	TADALAFIL	2003	2.61	2.58	2.21	2	389.4	1	7	74.9	1	22	6	0.27	3
FC(F)(F)COC1=CC(=C(OCC(F)(F)F)C=C1)C(=O)NCC2CCCCN2	5.8	3.46	4.46	1	0	1 0	1	3.66	41	8.785	0	10	0.59	1	2	28	0.29	5	2	0.31	1.01	3.19	414.35	0	13.68	9.62	1	8	20	59.59	FLECAINIDE ACETATE	2003	3.16	3.66	3.44	3.1	414.3	2	5	59.6	10	17	10	0.59	1
CC(CCCC(C)(C)O)[C@H]1CC[C@H]2C(CCC[C@]12C)=CC=C3CC(O)CC(O)C3=C	8.25	6.76	6.76	0	0	6 2	8	6.038	0	12.855	0	21	0.78	3	3	30	0.11	3	3	4.35	4.35	4.35	416.65	0	14	0	0	6	24	60.69	CALCITRIOL	2003	5.31	6.04	5.71	6	416.6	3	3	60.7	6	27	21	0.78	0
CCC1=N[N](CCCN2CCN(CC2)C3=CC(=CC=C3)Cl)[C](=O)[N]1CCOC4=CC=CC=C4	7.44	6.36	9.36	3	0	0 0	0	5.725	59	13.238	0	11	0.44	2	0	33	0.28	7	0	3.97	4.48	4.65	470.01	0	14	7.09	1	18	15	55.53	NEFAZODONE HYDROCHLORIDE	2003	4.25	5.73	3.55	4.4	470	0	7	55.5	10	25	11	0.44	3
CC(C)C1=NC(=NC(=C1C=CC(O)CC(O)CC(O)=O)C2=CC=C(F)C=C2)N(C)[S](C)(=O)=O	3.31	2.61	4.61	2	0	2 1	3	1.898	0	12.146	0	9	0.41	8	2	33	0.45	9	3	-0.54	-1.24	1.92	481.54	1	4	0	0	18	14	140.92	ROSUVASTATIN CALCIUM	2003	2.48	1.9	2.4	2	481.5	3	9	140.9	10	22	9	0.41	2
CCCC1=NC(=C2[N]1[NH]C(=N[C]2=O)C3=C(OCC)C=CC(=C3)[S](=O)(=O)N4CCN(CC)CC4)C	3.45	4.67	7.67	3	0	0 0	0	1.797	59	13.048	0	12	0.52	5	1	34	0.48	10	1	1.23	1.26	1.3	488.61	0	7.76	6.2	1	18	15	112.9	VARDENAFIL HYDROCHLORIDE	2003	2.85	1.8	2.07	3	488.6	1	10	112.9	8	23	12	0.52	3
CC(OC1OCCN(CC2=N[NH][C](=O)[NH]2)C1C3=CC=C(F)C=C3)C4=CC(=CC(=C4)C(F)(F)F)C(F)(F)F	5.98	5.57	8.57	3	0	3 0	3	4.596	41	11.712	0	9	0.39	4	2	37	0.3	7	2	4.98	4.51	5.22	534.43	1	6.59	3.63	1	18	19	83.24	APREPITANT	2003	3.94	4.6	4.95	4.1	534.4	2	7	83.2	8	23	9	0.39	3
CCC(=O)OC(O[P](=O)(CCCCC1=CC=CC=C1)CC(=O)N2CC(CC2C(O)=O)C3CCCCC3)C(C)C		5.45	6.45	1	0	4 0	4	7.445	51	15.191	0	21	0.7	5	0	39	0.27	8	1	3.05	2.4	5.62	563.67	1	3.87	0	0	14	25	110.21	FOSINOPRIL SODIUM	2003	5.65	7.44	6.12	5.7	563.7	1	8	110.2	16	30	21	0.7	1
S=[C]1N=C[NH]C2=C1[NH]C=N2	-0.23	0.99	2.99	2	0	0 0	0	-1.33	59	4.242	0	0	0	3	2	10	1	4	2	-0.12	-0.13	-0.12	152.18	0	9.5	2.99	0	10	0	57.36	MERCAPTOPURINE	2004	0.06	-1.33	1.02	-1.3	152.2	2	4	57.4	0	5	0	0	2
CC(C)CC(CN)CC(O)=O	1.57	-0.61	-0.61	0	0	1 0	1	-0.915	0	4.445	0	7	0.88	2	1	11	0.38	3	2	-1.35	-1.34	-1.35	159.23	1	4.8	10.23	1	2	9	63.32	PREGABALIN	2004	-1.16	-0.92	1.08	0.84	159.2	2	3	63.3	5	8	7	0.88	0
CCC1=NC=CC(=C1)C(N)=S	3.75	2.3	3.3	1	0	0 0	0	1.729	0	5.13	0	2	0.25	2	1	11	0.38	2	1	1.31	1.33	1.33	166.24	0	11.89	5	0	8	3	38.91	ETHIONAMIDE	2004	1.66	1.73	1.28	1.3	166.2	1	2	38.9	2	8	2	0.25	1
CC[S](=O)(=O)CC[N]1C(=NC=C1[N](=O)=O)C	1.82	0.65	1.65	1	0	0 0	0	-0.319	0	5.71	0	5	0.63	4	0	16	1	7	0	-0.58	-0.58	-0.58	247.27	0	14	3.1	0	9	5	97.78	TINIDAZOLE	2004	-0.26	-0.32	0.53	-0.48	247.3	0	7	97.8	5	8	5	0.63	1
CC1=CC=C(C=C1)C(=O)C2=CC(=C(O)C(=C2)O)[N](=O)=O	4.42	3.19	5.19	2	0	0 0	0	3.245	0	7.081	0	1	0.07	4	2	20	0.43	6	2	2.02	1.51	3.28	273.24	0	5.17	0	0	16	3	103.35	TOLCAPONE	2004	3.11	3.25	2.55	3	273.2	2	6	103.3	3	14	1	0.07	2
CC(NCCCC1=CC(=CC=C1)C(F)(F)F)C2=CC=CC3=CC=CC=C23	9.03	5.49	8.49	3	0	1 0	1	6.352	0	10.086	0	6	0.27	0	1	26	0.05	1	1	3.22	3.75	6.27	357.42	0	14	10.01	1	16	10	12.03	CINACALCET HYDROCHLORIDE	2004	6.15	6.35	6.14	6.6	357.4	1	1	12	7	22	6	0.27	3
COC(=O)C1=C(C)NC(=C(C1C2=CC=CC3=NON=C23)C(=O)OC(C)C)C	4.9	4.68	6.68	2	0	1 0	1	3.916	20	9.868	0	7	0.37	4	1	27	0.42	8	1	2	2	2	371.39	0	14	0	0	17	10	103.55	ISRADIPINE	2004	3.75	3.92	2.58	3	371.4	1	8	103.6	6	19	7	0.37	2
COC1=C(OC)C=C2C(=NC(=NC2=C1)N(C)CCCNC(=O)C3CCCO3)N	3.73	2.04	4.04	2	0	1 0	1	2.548	0	10.48	0	10	0.53	4	2	28	0.47	9	2	0.36	0.94	1.19	389.46	0	14	7.3	0	12	16	111.83	ALFUZOSIN HYDROCHLORIDE	2004	1.84	2.55	1.35	2.3	389.5	2	9	111.8	9	19	10	0.53	2
CC1=C(OC2=C(C=CC=C2C(=O)OCCN3CCCCC3)[C]1=O)C4=CC=CC=C4	7.17	7.53	10.53	3	0	0 0	0	4.97	0	11.229	0	8	0.33	2	0	29	0.21	5	0	3.38	3.98	4.24	391.47	0	14	7.29	1	19	10	59.75	FLAVOXATE HYDROCHLORIDE	2004	4.69	4.97	4.41	5.4	391.5	0	5	59.8	6	24	8	0.33	3
NC(=O)C(C1CCN(CCC2=CC3=C(OCC3)C=C2)C1)(C4=CC=CC=C4)C5=CC=CC=C5	5.91	4.52	7.52	3	0	1 0	1	3.621	0	12.92	0	9	0.32	1	1	32	0.14	4	1	1.29	1.9	4.54	426.56	0	14	10.11	1	20	12	55.56	DARIFENACIN HYDROBROMIDE	2004	4.19	3.62	3.96	3.8	426.6	1	4	55.6	7	28	9	0.32	3
NC1=NC(=CS1)\C(=N\OCC(O)=O)C(=O)NC2[C@H]3SCC(=C(N3C2=O)C(O)=O)C=C	0.01	0.17	1.17	1	0	2 1	3	0.252	30	10.844	40	4	0.25	9	2	30	0.88	12	4	-6.24	-7.09	-1.59	453.44	2	3.45	2.92	0	19	11	184.51	CEFIXIME	2004	-0.52	0.25	-0.54	-0.38	453.5	4	12	184.5	9	16	4	0.25	1
COC1C=CO[C@@]2(C)OC3=C(C)C(=C4C(=C(NC(=O)C(=CC=CC(C)C(O)C(C)C(O)C(C)C(OC(C)=O)C1C)C)C5=C(N=C6C=C(C)C=C[N]56)C4=C3C2=O)O)O	6.76	5.16	9.16	4	0	9 3	12	7.186	51	21.075	40	19	0.44	9	5	57	0.33	14	5	4.58	3.93	4.59	785.89	0	6.69	5.88	0	29	28	198.38	RIFAXIMIN	2004	4.28	7.19	6.16	5.9	785.9	5	14	198.4	3	43	19	0.44	4
CCC1OC(=O)C(C)C(=O)C(C)C(OC2OC(C)CC(C2O)N(C)C)[C@@](C)(CC(C)C(=O)C(C)[C@H]3N(CCCC[N]4C=NC(=C4)C5=CC=CN=C5)C(=O)O[C@]13C)OC	5.73	4.06	6.06	2	0	13 0	13	3.746	0	21.707	0	31	0.72	10	1	58	0.35	15	1	4.13	4.89	5.15	812.02	0	8.95	7.66	1	19	39	171.85	TELITHROMYCIN	2004	3.25	3.75	4.93	3.7	812	1	15	171.8	11	43	31	0.72	2
CC(N)C12CC3CC(CC(C3)C1)C2	6.72	2.14	2.14	0	0	1 0	1	3.963	0	5.58	0	12	1	0	1	13	0.08	1	1	-0.72	-0.35	2.22	179.31	0	14	10.14	1	0	13	26.02	RIMANTADINE HYDROCHLORIDE	2005	3.33	3.96	2.55	2.3	179.3	1	1	26	1	12	12	1	0
CC(=O)NCCC[S](O)(=O)=O	-0.89	-0.72	-0.72	0	0	0 0	0	-2.465	0	3.926	42	4	0.8	4	1	11	1.2	5	2	-4.1	-4.1	-2.75	181.21	1	-0.99	0	0	4	6	83.47	ACAMPROSATE CALCIUM	2005	-1.92	-2.47	-0.6	-1.7	181.2	2	5	83.5	5	5	4	0.8	0
CC(C)(C)NC[C@H](O)C1=CC(=C(O)C=C1)CO	2.07	-1.02	-0.02	1	0	1 0	1	0.061	0	6.763	0	7	0.54	3	4	17	0.31	4	4	-2.01	-1.32	0.34	239.31	0	10.12	9.4	1	6	11	72.72	LEVALBUTEROL TARTRATE	2005	0.51	0.06	1.31	0.63	239.3	4	4	72.7	5	13	7	0.54	1
NC1=CC=CC2=C1CN(C3CCC(=O)NC3=O)C2=O	1.08	-0.09	0.91	1	0	1 0	1	-0.412	30	6.794	0	4	0.31	3	2	19	0.46	6	2	-0.71	-0.71	-0.71	259.26	0	11.61	2.31	0	12	7	92.5	LENALIDOMIDE	2005	0.07	-0.41	0.03	0.05	259.3	2	6	92.5	1	13	4	0.31	1
CCC(=O)NCCC1CCC2=C1C3=C(OCC3)C=C2	5.2	5.54	6.54	1	0	1 0	1	2.485	0	7.529	0	9	0.56	1	1	19	0.19	3	1	2.57	2.57	2.57	259.35	0	14	0	0	8	11	38.33	RAMELTEON	2005	2.88	2.48	2.57	2.7	259.3	1	3	38.3	5	16	9	0.56	1
CC1=C[N](C2CC(N=[N+]=[N-])C(CO)O2)[C](=O)[NH][C]1=O	0.51	1.12	2.12	1	0	3 0	3	0.044	10	6.355	0	6	0.6	5	2	19	0.9	9	2	-0.41	-0.41	-0.3	267.25	0	9.96	0	0	10	8	133.08	ZIDOVUDINE	2005	-0.02	0.04	-0.2	-0.32	267.2	2	9	134.1	3	10	6	0.6	1
NC1=N[C](=O)C2=C([NH]1)[N](C=N2)C3CC(O)C(CO)C3=C	-1.07	-0.32	1.68	2	0	3 0	3	-1.959	10	7.105	0	5	0.42	5	4	20	0.67	8	4	-1.46	-1.54	-1.44	277.28	0	8	2.77	0	12	8	130.05	ENTECAVIR	2005	-1.02	-2.76	-0.83	-0.66	277.3	4	8	130.1	2	12	5	0.42	2
O=C1CN(\N=C\C2=CC=C(O2)C3=CC=C(C=C3)[N](=O)=O)C(=O)N1	2.45	3.39	5.39	2	0	0 1	1	1.631	20	8.007	0	1	0.07	4	1	23	0.64	9	1	1.25	1.2	1.26	314.26	0	8.23	0	0	19	3	120.73	DANTROLENE SODIUM	2005	1.56	1.63	1.74	1.4	314.3	1	9	120.7	4	14	1	0.07	2
COC1=CC=C2N=CC=C(C(O)[C@@H]3CC4CC[N@]3CC4C=C)C2=C1	4.99	2.4	4.4	2	0	5 0	5	2.785	0	9.562	0	9	0.45	2	1	24	0.2	4	1	0.01	0.86	2.51	324.42	0	13.89	9.05	1	12	12	45.59	QUININE SULFATE	2005	2.64	2.79	3.17	2.9	324.4	1	4	45.6	4	20	9	0.45	2
ClC1=CC=CC=C1C([N]2C=CN=C2)(C3=CC=CC=C3)C4=CC=CC=C4	7.76	6.95	10.95	4	0	0 0	0	5.004	0	10.396	0	1	0.05	1	0	25	0.09	2	0	5.7	5.82	5.84	344.84	0	14	6.26	0	23	2	17.82	CLOTRIMAZOLE	2005	5.56	5.25	5.38	5.5	344.8	0	2	17.8	4	22	1	0.05	4
O=C(OC1CN2CCC1CC2)N3CCC4=CC=CC=C4C3C5=CC=CC=C5	7.11	6.19	8.19	2	0	2 0	2	4.68	41	10.696	0	10	0.43	1	0	27	0.17	4	0	1.61	2.47	3.96	362.47	0	14	8.88	1	14	13	32.78	SOLIFENACIN SUCCINATE	2005	4.55	4.68	3.87	4.4	362.5	0	4	32.8	4	23	10	0.43	2
OC(=O)C1=CC=C(C=C1)[N]2N=C(N=C2C3=CC=CC=C3O)C4=CC=CC=C4O	3.59	0.7	4.7	4	0	0 0	0	3.668	0	10.188	0	0	0	6	2	28	0.33	7	3	2.75	1.89	4.74	373.37	1	4.51	0	0	25	3	108.47	DEFERASIROX	2005	3.09	3.67	3.71	4.5	373.4	3	7	108.5	4	21	0	0	4
CN1CCN(CC1)C(=O)OC2N(C(=O)C3=NC=CN=C23)C4=NC=C(Cl)C=C4	3.06	3.47	5.47	2	0	1 0	1	1.253	30	9.744	0	6	0.35	5	0	27	0.53	9	0	0.26	0.59	0.52	388.81	0	8.04	6.86	1	16	11	91.76	ESZOPICLONE	2005	1.71	1.25	1.57	0.77	388.8	0	9	91.8	4	17	6	0.35	2
CC=CC1=C(N2[C@H](SC1)[C@H](NC(=O)C(N)C3=CC=C(O)C=C3)C2=O)C(O)=O	-0.14	0.15	1.15	1	0	3 1	4	-1.873	41	10.098	40	5	0.28	5	3	27	0.5	8	4	-1.97	-2.27	-1.92	389.43	1	3.53	7.22	1	16	11	132.96	CEFPROZIL	2005	-1.58	-1.87	0.71	-0.39	389.4	4	8	133	6	18	5	0.28	1
COCCOC1=C(OCCOC)C=C2C(=NC=NC2=C1)NC3=CC=CC(=C3)C#C	5.63	5.45	8.45	3	0	0 0	0	4.192	0	11.03	0	6	0.27	4	1	29	0.32	7	1	3.2	3.2	3.2	393.44	0	14	4.62	0	16	11	74.73	ERLOTINIB HYDROCHLORIDE	2005	3.76	4.34	3.41	3.8	393.4	1	7	74.7	11	22	6	0.27	3
CC(C=CC(C)C(C)(C)O)[C@H]1CC[C@H]2C(CCC[C@]12C)=C[CH]=[C]3CC(O)[CH2]C(O)C3	8.04	6.99	6.99	0	0	7 2	9	5.688	0	12.703	0	21	0.78	3	3	30	0.11	3	3	4.26	4.26	4.26	416.65	0	14	0	0	6	24	60.69	PARICALCITOL	2005	5.11	5.69	5.56	6.4	416.6	3	3	60.7	5	27	21	0.78	0
CCCCC1=NC=C(\C=C(/CC2=CC=CS2)C(O)=O)[N]1CC3=CC=C(C=C3)C(O)=O	5.49	1.51	4.51	3	0	0 1	1	4.804	0	11.881	0	6	0.26	5	0	30	0.3	6	2	1.45	0.09	3.79	424.52	2	3.61	6.67	0	22	8	92.42	EPROSARTAN MESYLATE	2005	4.41	5.05	4.74	4.4	424.5	2	6	92.4	10	23	6	0.26	3
CCNC(=O)N(CCCN(C)C)C(=O)C1C[C@H]2[C@@H](CC3=C[NH]C4=CC=CC2=C34)N(CC=C)C1	5.2	2.43	4.43	2	0	3 0	3	4.171	40	13.32	0	14	0.54	2	2	33	0.27	7	2	-1.69	-0.05	2.58	451.62	0	14	9.32	2	15	18	71.68	CABERGOLINE	2005	3.21	4.17	3.19	4.4	451.6	2	7	71.7	11	26	14	0.54	2
CNC(=O)C1=NC=CC(=C1)OC2=CC=C(NC(=O)NC3=CC(=C(Cl)C=C3)C(F)(F)F)C=C2	5.82	5.53	8.53	3	0	0 0	0	5.455	0	11.224	0	2	0.1	4	3	32	0.33	7	3	4.34	4.34	4.34	464.83	0	11.55	2.03	0	22	10	92.35	SORAFENIB	2005	3.95	5.46	5.55	4.8	464.8	3	7	92.4	9	21	2	0.1	3
CN(C)C1[C@@H]2C[C@@H]3C(O)C4=C(C(=CC=C4Cl)O)C(=O)C3=C(O)[C@]2(O)C(=O)C(=C1O)C(N)=O	0.38	1.9	2.9	1	0	5 0	5	-0.576	10	11.316	0	8	0.38	8	6	32	0.48	10	6	-3.24	-3.61	-3.17	464.86	0	2.59	8.54	1	16	16	181.62	DEMECLOCYCLINE HYDROCHLORIDE	2005	0.61	-0.59	0.26	-0.19	464.9	6	10	181.6	2	21	8	0.38	1
CCC1=C(C)CN(C(O)=NCCC2=CC=C(C=C2)[S](=O)(=O)NC(O)=N[C@H]3CC[C@H](C)CC3)C1=O	5.51	4.18	5.18	1	0	0 2	2	4.774	59	13.067	0	13	0.54	7	3	34	0.42	9	3	-2.01	-2.26	4.76	490.62	0	2.25	0	0	16	17	131.66	GLIMEPIRIDE	2005	3.28	4.77	3.48	4.7	490.6	3	9	131.7	9	24	13	0.54	1
CCC[C@@]1(CCC2=CC=CC=C2)CC(=C([C@H](CC)C3=CC(=CC=C3)N[S](=O)(=O)C4=NC=C(C=C4)C(F)(F)F)C(=O)O1)O	8.62	6.22	9.22	3	0	2 0	2	7.764	51	15.496	0	11	0.35	5	1	42	0.26	7	2	4.59	3.45	7.14	602.67	1	4.43	0	0	24	17	105.59	TIPRANAVIR	2005	6.17	7.76	7.33	7.1	602.7	2	7	105.6	12	31	11	0.35	3
NC1CC1C2=CC=CC=C2	4.54	-0.02	0.98	1	0	2 0	2	1.478	0	4.311	0	3	0.33	0	1	10	0.11	1	1	-1.44	-0.82	1.34	133.19	0	14	9.62	1	6	4	26.02	TRANYLCYPROMINE SULFATE	2006	1.52	1.48	1.5	1.6	133.2	1	1	26	1	9	3	0.33	1
C#CCNC1CCC2=CC=CC=C12	5.62	3.96	4.96	1	0	1 0	1	2.344	0	5.46	0	4	0.33	0	1	13	0.08	1	1	0.42	1.27	2.3	171.24	0	14	8.4	1	6	5	12.03	RASAGILINE MESYLATE	2006	2.17	2.52	1.9	2.5	171.2	1	1	12	3	12	4	0.33	1
C[N]1C=NC2=C1[C](=O)[N](C)[C](=O)[N]2C	2.01	0.11	2.11	2	0	0 0	0	-0.04	10	4.99	0	3	0.38	3	0	14	0.75	6	0	-0.55	-0.55	-0.55	194.19	0	14	0	0	11	3	61.82	CAFFEINE CITRATE	2006	0.02	-0.04	-1.03	0.08	194.2	0	6	61.8	0	8	3	0.38	2
C1NC[C@@H]2C[C@H]1C3=CC4=NC=CN=C4C=C23	3.18	-0.32	1.68	2	0	2 0	2	0.899	0	6.287	0	5	0.38	2	1	16	0.23	3	1	-1.93	-1.27	1.01	211.27	0	14	9.73	1	10	6	37.81	VARENICLINE TARTRATE	2006	2.32	0.9	1.8	0.99	211.3	1	3	37.8	0	13	5	0.38	2
CC1=C[N](C2CC(O)C(CO)O2)[C](=O)[NH][C]1=O	-0.23	-0.39	0.61	1	0	3 0	3	-1.385	0	5.757	0	6	0.6	5	3	17	0.7	7	3	-1.12	-1.12	-1.12	242.23	0	9.96	0	0	8	9	104.55	TELBIVUDINE	2006	-1.17	-1.38	-1.51	-1.3	242.2	3	7	104.5	2	10	6	0.6	1
ONC(=O)CCCCCCC(=O)NC1=CC=CC=C1	2.74	2	3	1	0	0 0	0	0.989	0	7.361	0	6	0.43	3	2	19	0.36	5	3	2	1.99	2	264.32	1	8.91	0	0	10	9	78.43	VORINOSTAT	2006	2.1	0.99	2.47	1.6	264.3	3	5	78.4	10	14	6	0.43	1
CN1CC[C@@]23[C@H]4OC5=C(O)C=CC(=C25)C[C@@H]1[C@]3(O)CCC4=O	2.21	0.5	1.5	1	0	4 0	4	-0.484	0	7.944	0	10	0.59	3	2	22	0.29	5	2	-0.83	0.01	0.78	301.34	0	10.07	8.21	1	8	14	70	OXYMORPHONE HYDROCHLORIDE	2006	1.01	-0.48	0.75	0.52	301.3	2	5	70	0	17	10	0.59	1
C[C@]1(O)CC[C@H]2[C@@H]3CC[C@H]4CC(=O)OC[C@]4(C)[C@H]3CC[C@]12C	6.17	5	5	0	0	7 0	7	2.963	0	8.622	0	18	0.95	2	1	22	0.16	3	1	2.95	2.95	2.95	306.45	0	14	0	0	2	20	46.53	OXANDROLONE	2006	3.11	2.96	3.54	2.2	306.4	1	3	46.5	0	19	18	0.95	0
COC1=C(Cl)C2=C(C(=O)[C@]3(O2)C(C)CC(=O)C=C3OC)C(=C1)OC	4.79	5.49	6.49	1	0	2 0	2	2.053	10	8.661	0	7	0.41	2	0	24	0.35	6	0	2.17	2.17	2.17	352.77	0	14	0	0	12	12	71.06	GRISEOFULVIN	2006	2.18	1.91	2.81	1.5	352.8	0	6	71.1	3	17	7	0.41	1
CCCCC(F)(F)[C@@]1(O)CC[C@H]2[C@@H](CC(=O)C2CCCCCCC(O)=O)O1	5.68	3.23	3.23	0	0	4 0	4	3.832	0	9.66	0	18	0.9	5	1	27	0.25	5	2	2.39	1.6	4.56	390.47	1	4.3	0	0	4	23	83.83	LUBIPROSTONE	2006	3.62	3.83	4.31	4.5	390.5	2	5	83.8	11	20	18	0.9	0
CCN(CC)CCNC(=O)C1=C(C)[NH]C(=C1C)\C=C2/C(=O)NC3=C2C=C(F)C=C3	4.17	2.28	4.28	2	0	0 1	1	2.998	0	11.337	0	8	0.36	2	3	29	0.27	6	3	0.43	1.28	2.93	398.48	0	11.46	9.04	1	17	12	77.23	SUNITINIB MALATE	2006	2.98	3	3.34	2.3	398.5	3	6	77.2	8	22	8	0.36	2
NC(CC(=O)N1CC[N]2C(=NN=C2C(F)(F)F)C1)CC3=CC(=C(F)C=C3F)F	3.62	2.43	4.43	2	0	1 0	1	0.691	30	8.606	0	7	0.44	3	1	28	0.38	6	1	-0.96	-0.14	1.26	407.32	0	14	8.78	1	13	15	77.04	SITAGLIPTIN PHOSPHATE	2006	2.03	0.69	2.02	0.46	407.3	1	6	77	6	16	7	0.44	2
CCC(C)C(=O)OC1CC(O)C=C2C=CC(C)C(CCC(O)CC(O)CC(O)=O)[C@@H]12	3.76	1.53	1.53	0	0	8 0	8	2.048	0	11.276	0	17	0.74	6	3	30	0.3	7	4	-0.62	-1.38	1.65	424.53	1	4.21	0	0	8	22	124.29	PRAVASTATIN SODIUM	2006	2.18	2.05	2.44	2.3	424.5	4	7	124.3	11	23	17	0.74	0
CC1=C(CCN2CCC(CC2)C3=NOC4=C3C=CC(=C4)F)[C](=O)[N]5CCCC(O)C5=N1	4.18	2.47	5.47	3	0	1 0	1	1.874	0	11.43	0	12	0.52	4	1	31	0.3	7	1	-0.48	0.38	1.76	426.49	0	13.74	8.76	1	16	15	84.39	PALIPERIDONE	2006	3.23	1.07	3.08	1.5	426.5	1	7	84.4	4	23	12	0.52	3
COC1=CC=CC=C1OCC(O)CN2CCN(CC2)CC(=O)NC3=C(C)C=CC=C3C	3.93	4.48	6.48	2	0	1 0	1	1.012	0	12.189	0	11	0.46	2	2	31	0.29	7	2	2.38	2.74	2.83	427.55	0	13.78	6.77	1	14	17	74.27	RANOLAZINE	2006	2.99	1.01	2.31	2.3	427.5	2	7	74.3	10	24	11	0.46	2
CC1=NC(=CC(=N1)N2CCN(CCO)CC2)NC3=NC=C(S3)C(=O)NC4=C(C)C=CC=C4Cl	3.76	3.69	6.69	3	0	0 0	0	2.379	0	13.039	0	8	0.36	5	3	33	0.45	9	3	3.18	3.76	3.83	488.01	0	8.52	7.18	1	19	14	106.51	DASATINIB	2006	3.18	2.53	3.31	3.3	488	3	9	106.5	8	22	8	0.36	3
CC(C)C(N1CCCNC1=O)C(=O)NC(CC(O)C(CC2=CC=CC=C2)NC(=O)COC3=C(C)C=CC=C3C)CC4=CC=CC=C4	7.33	5.89	8.89	3	0	4 0	4	6.095	20	18.234	0	16	0.43	4	4	46	0.24	9	4	4.69	4.69	4.69	628.81	0	13.57	0	0	24	22	120	LOPINAVIR	2006	4.46	6.09	4.33	5.1	628.8	4	9	120	17	37	16	0.43	3
CC[C@@H]([C@H](C)O)[N]1N=C[N]([C]1=O)C2=CC=C(C=C2)N3CCN(CC3)C4=CC=C(OC[C@@H]5CO[C@@](C5)(C[N]6C=NC=N6)C7=C(F)C=C(F)C=C7)C=C4	5.9	5.92	10.92	5	0	4 0	4	4.113	40	18.791	0	15	0.41	6	1	51	0.32	12	1	5.41	5.41	5.41	700.79	0	14	3.93	0	29	22	115.7	POSACONAZOLE	2006	4.59	4.11	4.57	4.6	700.8	1	12	115.7	12	37	15	0.41	5
CC(O)C(O)[C@H]1CNC2=C(N1)[C](=O)[NH]C(=N2)N	-1.52	-0.48	0.52	1	0	3 0	3	-1.175	0	6.033	0	5	0.56	4	6	17	0.89	8	6	-2.34	-2.44	-2.32	241.25	0	7.82	1.81	0	7	10	136.29	SAPROPTERIN DIHYDROCHLORIDE	2007	-1.69	-1.17	-1.7	-2.9	241.2	6	8	136.3	2	9	5	0.56	1
CC(CC1=CC=CC=C1)NC(=O)C(N)CCCCN	3.28	0.92	1.92	1	0	2 0	2	0.81	0	8.005	0	8	0.53	1	3	19	0.27	4	3	-3.72	-2.54	1.14	263.38	0	14	10.21	2	8	11	81.14	LISDEXAMFETAMINE DIMESYLATE	2007	0.85	0.81	1.19	0.95	263.4	3	4	81.1	9	15	8	0.53	1
CC1=C(C=CC(C)=CC=CC(C)=CC(O)=O)C(C)(C)CCC1	8.75	6.2	6.2	0	0	0 4	4	6.744	0	10.098	0	9	0.45	2	0	22	0.1	2	1	3.5	2.64	5.01	300.44	1	5	0	0	12	10	37.3	TRETINOIN	2007	4.59	6.74	5.6	6.6	300.4	1	2	37.3	5	20	9	0.45	0
CN1C2CCCC1CC(C2)NC(=O)C3=N[N](C)C4=C3C=CC=C4	4.06	2.2	4.2	2	0	2 0	2	1.715	0	9.115	0	10	0.56	2	1	23	0.28	5	1	-0.58	0.27	1.88	312.42	0	14	9	1	11	12	50.16	GRANISETRON HYDROCHLORIDE	2007	2.69	1.72	2.32	2.8	312.4	1	5	50.2	3	18	10	0.56	2
CC(=O)OCC(CC[N]1C=NC2=CN=C(N)N=C12)COC(C)=O	1.95	1.84	3.84	2	0	0 0	0	0.085	0	8.093	0	7	0.5	5	1	23	0.64	9	1	-0.48	-0.48	-0.48	321.34	0	14	3.65	0	13	10	122.22	FAMCICLOVIR	2007	0.7	0.08	0.54	0.26	321.3	1	9	122.2	9	14	7	0.5	2
COC(C(OC1=NC(=CC(=N1)C)C)C(O)=O)(C2=CC=CC=C2)C3=CC=CC=C3	5.46	3.64	6.64	3	0	1 0	1	3.751	0	10.567	0	5	0.23	5	0	28	0.27	6	1	0.89	0.4	3.5	378.43	1	3.59	2.48	0	20	8	81.54	AMBRISENTAN	2007	3.96	3.75	3.52	3.6	378.4	1	6	81.5	7	22	5	0.23	3
NC1=NC(=CS1)\C(=N\O)C(=O)NC2[C@H]3SCC(=C(N3C2=O)C(O)=O)C=C	-0.05	0.21	1.21	1	0	2 1	3	-0.482	40	9.728	40	3	0.21	7	3	26	0.86	10	4	-4.21	-4.5	-1.67	395.41	1	1.73	7.45	0	17	9	158.21	CEFDINIR	2007	-0.12	-0.48	-0.17	0.11	395.4	4	10	158.2	6	14	3	0.21	1
COCCOC(=O)C1=C(C)NC(=C(C1C2=CC(=CC=C2)[N](=O)=O)C(=O)OC(C)C)C	5.23	5.24	6.24	1	0	1 0	1	4.003	20	11.08	0	9	0.43	4	1	30	0.43	9	1	2.54	2.54	2.54	418.45	0	14	0	0	16	13	119.68	NIMODIPINE	2007	4.18	4	2.97	3.2	418.4	1	9	119.7	10	21	9	0.43	1
COCC1=C(N2[C@H](SC1)C(NC(=O)\C(=N/OC)C3=CSC(=N3)N)C2=O)C(O)=O	0.67	0.11	1.11	1	0	2 1	3	-0.03	30	10.522	0	6	0.4	8	2	28	0.87	11	3	-3.57	-3.96	-1.67	427.45	1	3.22	4.16	0	15	13	156.44	CEFPODOXIME PROXETIL	2007	-0.17	-0.41	-0.54	-0.18	427.5	3	11	156.4	8	15	6	0.4	1
C[N]1[C](=O)C(=C(N=C1C(C)(C)NC(=O)C2=NN=C(C)O2)C(=O)NCC3=CC=C(F)C=C3)O	2.52	2.71	5.71	3	0	0 0	0	1.16	30	10.981	0	6	0.3	7	3	32	0.55	11	3	-0.5	-0.92	-0.39	444.42	0	7.02	0	0	22	10	152.24	RALTEGRAVIR POTASSIUM	2007	1.21	1.16	0.91	-0.42	444.4	3	11	152.2	8	20	6	0.3	3
CCCCCCCCCCCC(CC1OC(=O)C1CCCCCC)OC(=O)C(CC(C)C)NC=O	10.63	10.65	10.65	0	0	4 0	4	8.609	51	14.232	0	26	0.9	3	1	35	0.21	6	1	8.11	8.11	8.11	495.75	0	12.74	0	0	6	29	81.7	ORLISTAT	2007	7.05	8.61	6.88	8.3	495.7	1	6	81.7	24	29	26	0.9	0
CC(C)C1=NN=C(C)[N]1C2C[C@@H]3CC[C@H](C2)N3CC[C@H](N=C(O)C4CCC(F)(F)CC4)C5=CC=CC=C5	6.87	3.4	5.4	2	0	4 1	5	3.861	59	14.159	0	20	0.69	4	1	37	0.21	6	1	1.7	1.72	1.72	513.68	0	5.42	9.81	1	13	24	66.54	MARAVIROC	2007	5.99	3.86	6.79	6.1	513.7	1	6	66.5	8	29	20	0.69	2
CC1=C[N](C=N1)C2=CC(=CC(=C2)NC(=O)C3=CC(=C(C)C=C3)NC4=NC=CC(=N4)C5=CN=CC=C5)C(F)(F)F	6.29	4.76	9.76	5	0	0 0	0	5.694	0	13.993	0	3	0.11	5	2	39	0.29	8	2	5.27	5.35	5.36	529.53	0	12.38	5.92	0	31	8	97.62	NILOTINIB	2007	5.16	5.84	6.36	6	529.5	2	8	97.6	8	28	3	0.11	5
COCCCOC1=C(OC)C=CC(=C1)CC(CC(N)C(O)CC(C(C)C)C(=O)NCC(C)(C)C(N)=O)C(C)C	5.33	3.06	4.06	1	0	4 0	4	3.514	0	15.61	0	22	0.73	4	4	39	0.3	9	4	0.37	1	3.12	551.77	0	14	9.57	1	10	29	146.13	ALISKIREN HEMIFUMARATE	2007	2.68	3.51	3.29	3.3	551.8	4	9	146.1	20	30	22	0.73	1
C[S](=O)(=O)CCNCC1=CC=C(O1)C2=CC3=C(C=C2)N=CN=C3NC4=CC(=C(OCC5=CC(=CC=C5)F)C=C4)Cl	6.58	6.02	11.02	5	0	0 0	0	5.815	41	15.291	0	5	0.17	4	2	40	0.31	8	2	3.81	4.4	4.64	581.06	0	14	7.26	1	29	10	106.35	LAPATINIB DITOSYLATE	2007	5.27	5.97	6.14	5.3	581.1	2	8	106.3	11	29	5	0.17	5
C[C@H]1O[C@H](O[C@H]2[C@H](O)[C@@H](O)[C@H](O[C@@H]2CO)O[C@H]([C@H](O)CO)[C@H](O)[C@@H](O)C=O)[C@H](O)[C@@H](O)[C@@H]1N[C@H]3C=C(CO)[C@@H](O)[C@H](O)[C@H]3O	-4.87	0.85	0.85	0	0	18 0	18	-6.681	0	14.222	0	22	0.88	18	14	44	0.76	19	14	-8.89	-8.41	-8.25	645.61	0	11.83	7.03	1	4	40	329.01	ACARBOSE	2007	-3.77	-7.34	-8.72	-9	645.6	14	19	329	13	25	22	0.88	0
N[C@@H](CCC(N)=O)C(O)=O	-2.73	-0.11	-0.11	0	0	1 0	1	-3.375	0	3.458	0	3	0.6	3	2	10	1	5	3	-4	-4.01	-4	146.15	1	2.15	9.31	1	4	6	106.41	GLUTAMINE	2008	-3.38	-3.37	-1.34	-2.4	146.1	3	5	106.4	4	5	3	0.6	0
CC(O)([P](O)(O)=O)[P](O)(O)=O		-1.41	-1.41	0	0	0 0	0	-2.543	40	3.452	0	2	1	7	1	11	2	7	5	-6.94	-7.21	-2.28	206.03	4	0.7	0	0	4	7	135.29	ETIDRONATE DISODIUM	2008	-0.35	-2.54	-0.99	-2.5	206	5	7	135.3	2	2	2	1	0
NC(=O)C1=C[N](CC2=C(F)C=CC=C2F)N=N1	2.13	3.01	5.01	2	0	0 0	0	0.514	41	5.57	0	1	0.1	3	1	17	0.5	5	1	1.27	1.27	1.27	238.2	0	12.64	0	0	13	4	73.8	RUFINAMIDE	2008	0.47	0.51	0.7	0.4	238.2	1	5	73.8	3	10	1	0.1	2
CNCCCC1C2=CC=CC=C2C=CC3=CC=CC=C13	7.66	4.01	6.01	2	0	0 0	0	4.865	0	8.612	0	5	0.26	0	1	20	0.05	1	1	1.32	1.61	4.5	263.38	0	14	10.54	1	14	6	12.03	PROTRIPTYLINE HYDROCHLORIDE	2008	4.57	4.86	4.3	4.3	263.4	1	1	12	4	19	5	0.26	2
CN(C)CC(C1=CC=C(O)C=C1)C2(O)CCCCC2	4.81	2.19	3.19	1	0	1 0	1	2.683	0	7.824	0	10	0.63	2	2	19	0.19	3	2	0.21	1.07	2.29	263.38	0	10.11	8.87	1	6	13	43.7	DESVENLAFAXINE SUCCINATE	2008	2.63	2.68	2.73	2.9	263.4	2	3	43.7	4	16	10	0.63	1
COC1=C2O[C@H]3C(O)CC[C@H]4[C@H]5CC(=C2[C@@]34CCN5C)C=C1	4.25	1.16	2.16	1	0	5 0	5	1.261	0	8.373	0	12	0.67	1	1	22	0.22	4	1	-1.2	-0.38	1.55	301.39	0	14	9.33	1	6	16	41.93	DIHYDROCODEINE BITARTRATE	2008	1.53	1.26	1.73	2	301.4	1	4	41.9	1	18	12	0.67	1
COC1=C(OC)C=C2C3CC(=O)C(CC(C)C)CN3CCC2=C1	6.18	6.05	7.05	1	0	2 0	2	3.465	0	9.074	0	12	0.63	1	0	23	0.21	4	0	2.52	3.14	3.4	317.43	0	14	7.33	1	8	15	38.77	TETRABENAZINE	2008	2.36	3.46	3.24	2.9	317.4	0	4	38.8	4	19	12	0.63	1
CC(C)(OC1=CC=C(C=C1)C(=O)C2=CC=C(Cl)C=C2)C(O)=O	5.66	3.18	5.18	2	0	0 0	0	4.065	0	8.388	0	3	0.18	3	0	22	0.24	4	1	1.2	0.9	4.36	318.75	1	3.1	0	0	16	6	63.6	FENOFIBRIC ACID	2008	3.66	4.07	3.81	3.9	318.8	1	4	63.6	5	17	3	0.18	2
C[N@@+]1(CC[C@@]23C4OC5=C(O)C=CC(=C25)CC1[C@]3(O)CCC4=O)CC6CC6	1.83	2.27	3.27	1	1	5 0	5	-2.639	30	9.751	0	14	0.67	3	2	26	0.24	5	2	-2.47	-2.34	-2.49	356.44	0	9.9	0	1	8	18	66.76	METHYLNALTREXONE BROMIDE	2008	1.96	-2.64	1.67	-2.7	356.4	2	5	66.8	2	21	14	0.67	1
OC(CNCC(O)C1CCC2=C(O1)C=CC(=C2)F)C3CCC4=C(O3)C=CC(=C4)F	5.81	3.62	5.62	2	0	4 0	4	3.5	0	10.495	0	10	0.45	2	3	29	0.23	5	3	0.87	1.71	3.21	405.44	0	13.52	8.9	1	12	17	70.95	NEBIVOLOL HYDROCHLORIDE	2008	2.78	3.5	2.36	3.9	405.4	3	5	71	6	22	10	0.45	2
CCOC1=CC=C(CC2=C(Cl)C=CC(=C2)C3OC(CO)C(O)C(O)C3O)C=C1	4.86	3.74	5.74	2	0	5 0	5	3.369	0	10.607	0	9	0.43	5	4	28	0.29	6	4	2.11	2.11	2.11	408.88	0	12.57	0	0	12	16	99.38	DAPAGLIFLOZIN PROPANEDIOL	2008	1.98	3.37	1.84	2.3	408.9	4	6	99.4	6	21	9	0.43	2
CC(C)N(CCC(C1=CC=CC=C1)C2=C(OC(=O)C(C)C)C=CC(=C2)CO)C(C)C	6.9	5.75	7.75	2	0	1 0	1	4.357	0	12.404	0	13	0.5	2	1	30	0.15	4	1	2.29	2.65	5.7	411.59	0	14	10.64	1	14	16	49.77	FESOTERODINE FUMARATE	2008	5.26	4.36	5.38	4.8	411.6	1	4	49.8	11	26	13	0.5	2
CC[C@@]1(O)C(=O)OCC2=C1C=C3[N](CC4=CC5=C(C=CC(=C5CN(C)C)O)N=C34)[C]2=O	2.69	0.92	3.92	3	0	1 0	1	0.71	0	11.435	0	8	0.35	5	2	31	0.35	8	2	-1.69	-0.91	-0.33	421.45	0	8	9.75	1	19	12	104.89	TOPOTECAN HYDROCHLORIDE	2008	1.11	0.73	1.85	1.3	421.4	2	8	104.9	3	23	8	0.35	3
CC1=CC(=CC(=C1OC2=C(Br)C(=NC(=N2)NC3=CC=C(C=C3)C#N)N)C)C#N	5.86	5.76	8.76	3	0	0 0	0	5.074	0	10.839	0	2	0.1	5	2	28	0.35	7	2	5.54	5.54	5.54	435.29	0	10.99	3.29	0	18	6	120.64	ETRAVIRINE	2008	4.65	5.22	4.72	5.5	435.3	2	7	120.6	6	20	2	0.1	3
CC1=CC=C(C=C1C)N2N=C(C)\C(=N\NC3=C(O)C(=CC=C3)C4=CC=CC(=C4)C(O)=O)C2=O	5.31	2.99	5.99	3	0	0 1	1	5.249	59	12.886	0	3	0.12	6	2	33	0.32	8	3	2.48	1.28	6.03	442.48	1	3.97	0	0	26	7	114.59	ELTROMBOPAG OLAMINE	2008	4.49	5.25	4.57	5	442.5	3	8	114.6	5	25	3	0.12	3
CC(C)CN(CC(O)C(CC1=CC=CC=C1)NC(=O)OC2CO[C@H]3OCC[C@@H]23)[S](=O)(=O)C4=CC=C(N)C=C4	4.67	4.75	6.75	2	0	5 0	5	2.887	0	14.429	0	14	0.52	6	3	38	0.41	10	3	2.82	2.82	2.82	547.67	0	13.73	2.39	0	16	21	140.42	DARUNAVIR ETHANOLATE	2008	2.77	2.89	2.38	2.8	547.7	3	10	140.4	13	27	14	0.52	2
NC(CCC(O)=O)C=C	-0.13	-1.18	-1.18	0	0	1 0	1	-2.217	0	3.492	0	3	0.5	2	1	9	0.5	3	2	-2.1	-2.09	-2.09	129.16	1	4.61	9.91	1	4	5	63.32	VIGABATRIN	2009	-2.12	-2.22	0.36	-0.45	129.2	2	3	63.3	4	6	3	0.5	0
CCC(C(C)CN(C)C)C1=CC(=CC=C1)O	5.82	3.21	4.21	1	0	2 0	2	3.154	0	6.921	0	8	0.57	1	1	16	0.14	2	1	0.35	1.07	2.96	221.34	0	10.28	9.6	1	6	10	23.47	TAPENTADOL HYDROCHLORIDE	2009	3.02	3.15	3.08	3.6	221.3	1	2	23.5	5	14	8	0.57	1
CCN(CC)C(=O)[C@@]1(CC1CN)C2=CC=CC=C2	4.76	1.19	2.19	1	0	2 0	2	1.906	41	7.498	0	8	0.53	1	1	18	0.2	3	1	-1.43	-0.91	1.42	246.35	0	14	9.83	1	8	10	46.33	MILNACIPRAN HYDROCHLORIDE	2009	1.59	1.91	1.77	0.9	246.3	1	3	46.3	6	15	8	0.53	1
COCC(NC(C)=O)C(=O)NCC1=CC=CC=C1	2.86	1.39	2.39	1	0	1 0	1	0.392	0	6.897	0	5	0.38	3	2	18	0.38	5	2	-0.02	-0.02	-0.02	250.3	0	12.47	0	0	10	8	67.43	LACOSAMIDE	2009	0.35	0.39	0.45	-0.2	250.3	2	5	67.4	8	13	5	0.38	1
NC(=O)C[S@@](=O)C(C1=CC=CC=C1)C2=CC=CC=C2	3.45	2.68	4.68	2	0	1 0	1	0.937	41	7.835	0	2	0.13	2	1	19	0.27	3	1	1.53	1.52	1.53	273.35	0	8.84	0	0	16	3	60.16	ARMODAFINIL	2009	1.62	0.94	2.01	1.2	273.4	1	3	60.2	5	15	2	0.13	2
C[N]1C2=C(C(=O)N(CC2)CC3=C(C)[NH]C=N3)C4=CC=CC=C14	3.69	2.31	5.31	3	0	0 0	0	1.737	30	8.545	0	5	0.29	2	1	22	0.29	5	1	0.8	1.12	1.21	294.36	0	13.32	6.81	0	16	6	53.92	ALOSETRON HYDROCHLORIDE	2009	2.64	1.74	2.41	1.4	294.4	1	5	53.9	2	17	5	0.29	3
COC1O[C@@H]2O[C@@]3(C)CC[C@H]4C(C)CC[C@@H](C1C)[C@@]24OO3	5.42	4.17	4.17	0	0	8 0	8	3.055	20	7.781	0	16	1	5	0	21	0.31	5	0	3.48	3.48	3.48	298.38	0	14	0	0	0	21	46.15	ARTEMETHER	2009	2.94	3.05	2.84	3.4	298.4	0	5	46.2	1	16	16	1	0
NC(C(=O)N1C(CC2CC12)C#N)C34CC5CC(CC(O)(C5)C3)C4	2.71	1.16	1.16	0	0	6 0	6	0.011	30	8.619	0	16	0.89	3	2	23	0.28	5	2	-1.48	-0.7	-0.08	315.42	0	14	7.9	1	2	19	90.35	SAXAGLIPTIN HYDROCHLORIDE	2009	1.94	-0.02	1.16	0.09	315.4	2	5	90.4	4	18	16	0.89	0
CC(C)COC1=C(C=C(C=C1)C2=NC(=C(S2)C(O)=O)C)C#N	5.34	2.45	4.45	2	0	0 0	0	4.097	0	8.4	0	5	0.31	4	0	22	0.38	5	1	0.7	0.17	3.52	316.38	1	3.59	0.4	0	13	7	83.21	FEBUXOSTAT	2009	3.29	4.1	3.72	4.5	316.4	1	5	83.2	6	16	5	0.31	2
ClC(Cl)C(C1=CC=C(Cl)C=C1)C2=CC=CC=C2Cl	8.9	8.35	10.35	2	0	1 0	1	6.06	0	8.093	0	2	0.14	0	0	18	0	0	0	6.11	6.11	6.11	320.03	0	14	0	0	12	6	0	MITOTANE	2009	6.03	6.06	5.93	5.9	320	0	0	0	3	14	2	0.14	2
CCC(=O)O[C@@](CC1=CC=CC=C1)([C@H](C)CN(C)C)C2=CC=CC=C2	7.94	6.79	8.79	2	0	2 0	2	5.21	0	10.395	0	9	0.41	1	0	25	0.14	3	0	2.01	2.8	4.9	339.48	0	14	9.52	1	14	11	29.54	PROPOXYPHENE NAPSYLATE	2009	4.5	5.21	4.28	4.1	339.5	0	3	29.5	9	22	9	0.41	2
CC1=C(OCC(F)(F)F)C=CN=C1C[S@@](=O)C2=NC3=CC=CC=C3[NH]2	4.36	4.69	7.69	3	0	1 0	1	2.598	41	8.789	0	4	0.25	3	1	25	0.38	5	1	3.03	3.03	3.03	369.36	0	9.35	4.16	0	17	8	67.87	DEXLANSOPRAZOLE	2009	2.97	2.6	3.52	2.5	369.4	1	5	67.9	6	16	4	0.25	3
CC(=O)OC1=CC2=C(CCN(C2)C(C(=O)C3CC3)C4=CC=CC=C4F)S1	5.99	6.63	8.63	2	0	1 0	1	3.431	41	9.941	0	8	0.4	2	0	26	0.25	4	0	4.29	4.3	4.31	373.44	0	14	5.12	1	15	11	46.61	PRASUGREL HYDROCHLORIDE	2009	3.21	3.43	3.89	3.6	373.4	0	4	46.6	6	20	8	0.4	2
CCCCCC(O)CCC1C(O)C[C@@H]2CC3=C(C[C@H]12)C=CC=C3OCC(O)=O	5.66	3.57	4.57	1	0	5 0	5	3.723	0	10.866	0	16	0.7	4	2	28	0.22	5	3	1.33	0.72	4	390.52	1	3.76	0	0	8	20	86.99	TREPROSTINIL	2009	4.25	3.72	3.58	4.6	390.5	3	5	87	10	23	16	0.7	1
C[C@H](CCC(O)=O)[C@H]1CC[C@H]2[C@@H]3[C@H](O)C[C@@H]4C[C@H](O)CC[C@]4(C)[C@H]3CC[C@]12C	6.29	2.91	2.91	0	0	10 0	10	4.514	0	11.094	0	23	0.96	4	2	28	0.17	4	3	1.81	0.98	3.71	392.58	1	4.6	0	0	2	26	77.76	CHENODIOL	2009	4.22	4.51	4.48	4.4	392.6	3	4	77.8	4	24	23	0.96	0
COC1=CC=C2C(=C[C]1=O)C(CCC3=C2C(=C(OC)C(=C3)OC)OC)NC(C)=O	3.73	2.75	4.75	2	0	1 0	1	1.195	0	10.859	0	8	0.36	2	1	29	0.32	7	1	1.46	1.46	1.46	399.44	0	14	0	0	16	13	83.09	COLCHICINE	2009	1.3	1.2	2.87	1.1	399.4	1	7	83.1	6	22	8	0.36	2
CC(C)[C@@H](C)\C=C\[C@@H](C)[C@H]1CC[C@H]2\C(CCC[C@]12C)=C\C=C3/C[C@@H](O)C[C@H](O)C3=C	10.31	9.39	9.39	0	0	7 3	10	8.16	51	13.14	0	20	0.71	2	2	30	0.07	2	2	5.75	5.75	5.75	412.66	0	14	0	0	8	22	40.46	DOXERCALCIFEROL	2009	6.1	8.16	6.61	6.7	412.7	2	2	40.5	5	28	20	0.71	0
COC1=C(OCCCN2CCC(CC2)C3=NOC4=C3C=CC(=C4)F)C=CC(=C1)C(C)=O	6.23	5.97	8.97	3	0	0 0	0	3.916	0	11.541	0	10	0.42	2	0	31	0.25	6	0	1.8	2.6	3.22	426.49	0	14	7.91	1	17	14	64.8	ILOPERIDONE	2009	3.92	3.92	4.83	4.3	426.5	0	6	64.8	8	24	10	0.42	3
C[N]1N=C2C=C(C=CC2=C1C)N(C)C3=CC=NC(=N3)NC4=CC=C(C)C(=C4)[S](N)(=O)=O	3.98	3.77	7.77	4	0	0 0	0	3.504	0	12.029	0	4	0.19	5	2	31	0.48	9	2	3.55	3.55	3.55	437.52	0	10.41	4.36	0	23	7	119.03	PAZOPANIB HYDROCHLORIDE	2009	3.47	3.65	3.14	4	437.5	2	9	119	5	21	4	0.19	4
CC1=CC=CC=C1C(=O)NC2=CC(=C(C=C2)C(=O)N3CCCC(O)C4=C3C=CC(=C4)Cl)C	6.22	5.64	8.64	3	0	1 0	1	4.31	0	12.697	0	6	0.23	3	2	32	0.19	5	2	5.35	5.35	5.35	448.95	0	14	0	0	22	10	69.64	TOLVAPTAN	2009	4.15	4.31	5.68	5.2	448.9	2	5	69.6	5	26	6	0.23	3
CO[C@]12CC[C@@]3(CC1[C@](C)(O)C(C)(C)C)C4CC5=C6C(=C(O)C=C5)OC2[C@@]36CCN4CC7CC7	6.62	4.18	5.18	1	0	7 0	7	3.989	0	13.313	0	23	0.79	3	2	34	0.17	5	2	0.91	1.61	3.55	467.65	0	10.42	9.63	1	6	28	62.16	BUPRENORPHINE HYDROCHLORIDE	2009	2.97	3.99	4.41	4.4	467.6	2	5	62.2	5	29	23	0.79	1
CC(CC1=CC2=C(N(CCCO)CC2)C(=C1)C(N)=O)NCCOC3=CC=CC=C3OCC(F)(F)F	5.07	3.6	5.6	2	0	1 0	1	2.968	41	12.699	0	12	0.48	2	3	35	0.28	7	3	0.15	0.83	3.05	495.54	0	14	9.66	1	14	21	97.05	SILODOSIN	2009	3.57	2.97	3.07	3	495.5	3	7	97.1	14	25	12	0.48	2
CCCCN(CCCC)CCCOC1=CC=C(C=C1)C(=O)C2=C(CCCC)OC3=C2C=C(N[S](C)(=O)=O)C=C3	9.19	7	10	3	0	0 0	0	8.567	51	15.785	0	16	0.52	3	0	39	0.26	7	1	3.19	3.96	5.28	556.76	1	9.08	9.79	1	19	19	88.85	DRONEDARONE	2009	6.54	8.57	7.05	7.3	556.8	1	7	88.9	18	31	16	0.52	3
CC(C)CN(CC(O[P](O)(O)=O)C(CC1=CC=CC=C1)NC(=O)OC2CCOC2)[S](=O)(=O)C3=CC=C(N)C=C3		1.02	3.02	2	0	3 0	3	2.501	0	14.622	0	12	0.48	7	2	39	0.52	12	4	-0.49	-1.2	1.92	585.61	2	1.22	2.45	0	18	20	177.72	FOSAMPRENAVIR CALCIUM	2009	2.7	3.04	2.52	2.5	585.6	4	12	177.7	15	25	12	0.48	2
COC1C[C@@H](CCC1OCCO)CC(C)[C@@H]2CC(=O)C(C)C=C(C)C(O)C(OC)C(=O)C(C)CC(C)C=CC=CC=C(C)C(C[C@@H]3CCC(C)[C@@](O)(O3)C(=O)C(=O)N4CCCC[C@H]4C(=O)O2)OC	8.98	7.52	7.52	0	0	15 4	19	7.103	40	25.873	0	40	0.75	13	3	68	0.28	15	3	7.4	7.4	7.4	958.24	0	9.96	0	0	18	50	204.66	EVEROLIMUS	2009	3.82	7.1	6.2	5.7	958.2	3	15	204.7	9	53	40	0.75	0
N=[C]1C=C[NH]C=C1	1.02	0.57	1.57	1	0	0 0	0	-1.639	59	2.846	42	0	0	1	2	7	0.4	2	2	-3.13	-3.11	0.29	94.12	0	14	12.18	0	7	0	39.64	DALFAMPRIDINE	2010	0.12	-1.64	0.49	-0.21	94.1	2	2	39.6	0	5	0	0	1
NCC1CCC(CC1)C(O)=O	0.77	-0.17	-0.17	0	0	0 0	0	-1.801	0	4.268	0	7	0.88	2	1	11	0.38	3	2	-1.56	-1.55	-1.55	157.21	1	4.56	10.22	1	2	9	63.32	TRANEXAMIC ACID	2010	-1.37	-1.8	0.84	0.34	157.2	2	3	63.3	2	8	7	0.88	0
NC(=O)NC(CCC(O)=O)C(O)=O	-2.68	-1.23	-1.23	0	0	1 0	1	-1.935	0	4.111	0	3	0.5	5	2	13	1.17	7	4	-6.72	-7.92	-1.45	190.16	2	3.36	0	0	6	7	129.72	CARGLUMIC ACID	2010	-1.12	-1.94	-1.03	-1.3	190.2	4	7	129.7	6	6	3	0.5	0
CC(CC1=CC=CC=C1)N(C)CC2=CC=CC=C2	7.47	7.21	9.21	2	0	1 0	1	4.382	0	7.887	0	5	0.29	0	0	18	0.06	1	0	1.31	2.05	4.34	239.36	0	14	9.72	1	12	6	3.24	BENZPHETAMINE HYDROCHLORIDE	2010	3.85	4.38	3.75	3.8	239.4	0	1	3.2	5	17	5	0.29	2
CN(C)CCC1=C[NH]C2=CC=C(CC3COC(=O)N3)C=C12	3	1.95	3.95	2	0	1 0	1	1.288	0	8.265	0	7	0.44	1	2	21	0.31	5	2	-0.87	-0.09	2.04	287.36	0	13	9.55	1	11	10	57.36	ZOLMITRIPTAN	2010	2.13	1.29	1.92	1.5	287.4	2	5	57.4	5	16	7	0.44	2
CCCCCCCCC1=CC=C(CCC(N)(CO)CO)C=C1	7.51	3.45	4.45	1	0	0 0	0	5.058	0	9.393	0	13	0.68	2	3	22	0.16	3	3	1.41	2.12	4.06	307.48	0	14	9.38	1	6	16	66.48	FINGOLIMOD HYDROCHLORIDE	2010	3.21	5.06	3.2	3.7	307.5	3	3	66.5	12	19	13	0.68	1
CC1=CC=C(C=C1)[S](=O)(=O)NC(=O)NN2CCCCCC2	3.29	2.63	3.63	1	0	0 0	0	1.338	0	8.236	0	7	0.5	4	2	21	0.5	6	2	0.98	0.97	1.91	311.4	1	4.07	1.61	0	10	10	78.51	TOLAZAMIDE	2010	1.45	1.34	1.77	1.9	311.4	2	6	78.5	5	14	7	0.5	1
CN(C)CCC(C1=CC=C(Br)C=C1)C2=CC=CC=N2	6.21	4.15	6.15	2	0	1 0	1	3.298	0	8.453	0	5	0.31	1	0	19	0.12	2	0	0.88	1.68	3.75	319.25	0	14	9.48	1	12	7	16.13	BROMPHENIRAMINE MALEATE	2010	3.7	3.3	3.93	3.5	319.2	0	2	16.1	5	16	5	0.31	2
CCOC(=O)C1=CN=C(C=C1)C#CC2=CC3=C(SCCC3(C)C)C=C2	8.16	6.85	8.85	2	0	0 0	0	6.075	0	10.546	0	7	0.33	2	0	25	0.19	3	0	5.22	5.22	5.22	351.46	0	14	1.23	0	14	9	39.19	TAZAROTENE	2010	5.01	6.07	4.43	5.3	351.5	0	3	39.2	5	21	7	0.33	2
CCCCCCC(C)(C)C1=CC(=C2[C@@H]3CC(=O)CC[C@H]3C(C)(C)OC2=C1)O	8.7	8.05	9.05	1	0	2 0	2	6.72	0	11.024	0	17	0.71	2	1	27	0.12	3	1	6.36	6.35	6.36	372.55	0	9.33	0	0	8	19	46.53	NABILONE	2010	5.68	6.72	6.26	6.9	372.5	1	3	46.5	6	24	17	0.71	1
OC(C(=O)OC1C[C@@H]2CC[C@H](C1)[N+]23CCCC3)(C4=CC=CC=C4)C5=CC=CC=C5	4.05	4.99	6.99	2	1	3 0	3	-1.155	30	11.496	0	12	0.48	2	1	29	0.16	4	1	-0.5	-0.5	-0.5	392.52	0	11.05	0	1	14	15	46.53	TROSPIUM CHLORIDE	2010	3.83	-1.15	3.77	0.83	392.5	1	4	46.5	5	25	12	0.48	2
OC(CC(O)C=CC1=C(C2=CC=C(F)C=C2)C3=CC=CC=C3N=C1C4CC4)CC(O)=O	4.86	2.43	5.43	3	0	2 1	3	3.589	0	11.738	0	7	0.28	5	2	31	0.2	5	3	1.65	0.89	2.92	421.47	1	4.13	4.86	0	20	11	90.65	PITAVASTATIN CALCIUM	2010	3.9	3.59	4.52	3.9	421.5	3	5	90.7	8	25	7	0.28	3
CN(C)C1=CC=C(C=C1)C2C[C@@]3(C)C(CC[C@]3(O)C(C)=O)C4CCC5=CC(=O)CCC5=C24	6.88	6.22	7.22	1	0	5 0	5	3.97	10	12.573	40	16	0.57	3	1	32	0.14	4	1	4.17	4.18	4.18	433.59	0	12.7	4.89	0	14	18	57.61	ULIPRISTAL ACETATE	2010	4.16	3.78	4.97	4.4	433.6	1	4	57.6	3	28	16	0.57	1
CC(C)NC1=C(N=CC=C1)N2CCN(CC2)C(=O)C3=CC4=C([NH]3)C=CC(=C4)N[S](C)(=O)=O	2.63	3.24	6.24	3	0	0 0	0	2.412	0	12.486	0	8	0.36	3	2	32	0.45	9	3	0.56	0.92	1.02	456.57	1	9.39	6.82	1	19	12	110.43	DELAVIRDINE MESYLATE	2010	1.36	2.41	2.72	2.5	456.6	3	9	110.4	7	22	8	0.36	3
O=C1C2C3CCC(C3)C2C(=O)N1CC4CCCCC4CN5CCN(CC5)C6=NSC7=CC=CC=C67	7.77	7.1	9.1	2	0	6 0	6	5.614	10	14.005	0	19	0.68	3	0	35	0.25	6	0	2.57	3.43	4.56	492.68	0	14	8.5	1	13	22	56.75	LURASIDONE HYDROCHLORIDE	2010	4.66	5.61	4.26	4.7	492.7	0	6	56.8	5	28	19	0.68	2
CO\N=C(/C(=O)NC1[C@H]2SCC(=C(N2C1=O)C(O)=O)C=CC3=C(C)N=CS3)C4=CSC(=N4)N	2.23	0.44	2.44	2	0	2 2	4	1.465	41	12.993	40	5	0.26	8	2	33	0.74	11	3	-2.27	-2.65	-0.42	506.57	1	3.4	4.22	0	22	11	160.1	CEFDITOREN PIVOXIL	2010	1.29	1.46	1.29	1.6	506.6	3	11	160.1	8	19	5	0.26	2
C[C@]12CC[C@H]3[C@@H](CC[C@H]4NC(=O)C=C[C@]34C)[C@@H]1CC[C@@H]2C(=O)NC5=CC(=CC=C5C(F)(F)F)C(F)(F)F	7.23	8.29	9.29	1	0	7 0	7	4.94	20	12.671	0	17	0.63	2	2	37	0.15	4	2	5.79	5.79	5.79	528.54	0	12.57	0	0	12	25	58.2	DUTASTERIDE	2010	5.28	4.94	6.58	5.4	528.5	2	4	58.2	5	27	17	0.63	1
CCCCCCOC(=O)N=C(N)C1=CC=C(NCC2=NC3=C(C=CC(=C3)C(=O)N(CCC(=O)OCC)C4=CC=CC=N4)[N]2C)C=C1	5.6	6.46	10.46	4	0	0 1	1	4.129	40	17.842	0	12	0.35	5	2	46	0.35	12	2	4.59	4.59	4.59	627.75	0	14	3.65	1	29	17	154.03	DABIGATRAN ETEXILATE MESYLATE	2010	4.05	4.13	5.6	5.5	627.7	2	12	154	19	34	12	0.35	4
CC(C)C(NC(=O)N(C)CC1=CSC(=N1)C(C)C)C(=O)NC(CC(O)C(CC2=CC=CC=C2)NC(=O)OCC3=CN=CS3)CC4=CC=CC=C4	6.79	5.41	9.41	4	0	4 0	4	4.937	41	20.118	0	16	0.43	6	4	50	0.35	11	4	5.22	5.22	5.22	720.95	0	13.85	2.84	0	28	22	145.78	RITONAVIR	2010	5.03	4.94	5.91	5.5	720.9	4	11	145.8	22	37	16	0.43	4
C[N]1C=C[C](=O)C(=C1C)O	1.45	-0.62	0.38	1	0	0 0	0	-0.903	0	3.771	0	2	0.29	2	1	10	0.43	3	1	0.61	0.61	0.61	139.15	0	11.82	0	0	7	3	42.23	DEFERIPRONE	2011	-0.68	-0.9	0.4	-0.63	139.2	1	3	42.2	0	7	2	0.29	1
COC1=CC(=C2N=CC=CC2=C1)NC(C)CCCN	4.44	0.99	2.99	2	0	1 0	1	2.598	0	7.839	0	6	0.4	1	2	19	0.27	4	2	-1.31	-0.96	1.64	259.35	0	14	10.2	1	10	9	60.17	PRIMAQUINE PHOSPHATE	2011	1.64	2.6	2.78	2.7	259.3	2	4	60.2	6	15	6	0.4	2
NC(CC1=CC=C(C=C1)N(CCCl)CCCl)C(O)=O	2.69	0.94	1.94	1	0	1 0	1	-0.207	0	7.844	0	6	0.46	2	1	19	0.31	4	2	0.25	0.25	0.25	305.2	1	1.29	9.51	1	8	11	66.56	MELPHALAN	2011	-0.39	-0.21	1.93	2	305.2	2	4	66.6	8	13	6	0.46	1
N#CCC(C1CCCC1)[N]2C=C(C=N2)C3=C4C=C[NH]C4=NC=N3	3.5	3.98	6.98	3	0	1 0	1	2.215	0	8.66	0	7	0.41	4	1	23	0.35	6	1	2.48	2.48	2.48	306.37	0	13.89	3.91	0	14	7	83.18	RUXOLITINIB	2011	3.51	2.18	3.47	1.8	306.4	1	6	83.2	5	17	7	0.41	3
O=C1CN(CC2N1CCC3=CC=CC=C23)C(=O)C4CCCCC4	5.99	5.25	6.25	1	0	1 0	1	3.36	41	8.995	0	11	0.58	2	0	23	0.21	4	0	2.3	2.3	2.3	312.41	0	14	0	0	10	13	40.62	PRAZIQUANTEL	2011	2.96	3.36	2.54	1.8	312.4	0	4	40.6	2	19	11	0.58	1
C[C@]12CCC(O)CC1=CC[C@@H]3[C@@H]2CC[C@@]4(C)[C@H]3CC=C4C5=CC=CN=C5	7.52	5.57	6.57	1	0	6 0	6	5.165	0	10.682	0	15	0.63	2	1	26	0.08	2	1	3.96	3.96	3.97	349.52	0	14	4.81	0	10	16	33.12	ABIRATERONE ACETATE	2011	4.57	5.16	5.4	5.2	349.5	1	2	33.1	1	24	15	0.63	1
CC1=C(NC2=NC(=NC=C2)NC3=CC=C(C=C3)C#N)C(=CC(=C1)\C=C\C#N)C	6.33	6.43	9.43	3	0	0 1	1	5.452	0	11.115	0	2	0.09	4	2	28	0.27	6	2	5.47	5.47	5.47	366.43	0	11.43	4.44	0	20	4	97.42	RILPIVIRINE HYDROCHLORIDE	2011	4.81	5.75	4.99	5.1	366.4	2	6	97.4	7	22	2	0.09	3
FC(F)OC1=C(OCC2CC2)C=C(C=C1)C(=O)NC3=C(Cl)C=NC=C3Cl	5.17	7.11	9.11	2	0	0 0	0	3.003	0	9.359	0	5	0.29	2	1	26	0.29	5	1	4.45	4.45	4.45	403.21	0	13.3	2.4	0	14	12	60.45	ROFLUMILAST	2011	4.21	3	5.03	3.5	403.2	1	5	60.5	8	17	5	0.29	2
ClC1=CC=C(S1)C(=O)NC[C@H]2CN(C(=O)O2)C3=CC=C(C=C3)N4CCOCC4=O	4.29	4.02	6.02	2	0	1 0	1	2.394	20	10.839	0	6	0.32	4	1	29	0.47	8	1	1.9	1.9	1.9	435.88	0	13.6	0	0	17	12	88.18	RIVAROXABAN	2011	2.18	2.39	2.52	2.6	435.9	1	8	88.2	6	19	6	0.32	2
NC(=O)C1=CC2=C(O1)C=CC(=C2)N3CCN(CCCCC4=C[NH]C5=C4C=C(C=C5)C#N)CC3	4.59	4.26	8.26	4	0	0 0	0	4.077	0	12.835	0	8	0.31	2	2	33	0.27	7	2	1.62	2.49	3.72	441.54	0	14	8.6	1	20	11	102.29	VILAZODONE HYDROCHLORIDE	2011	3.84	4.08	4.03	4	441.5	2	7	102.3	8	26	8	0.31	4
C[C@@H](OC1=CC(=CN=C1N)C2=C[N](N=C2)C3CCNCC3)C4=C(Cl)C=CC(=C4Cl)F	5.37	3.25	6.25	3	0	1 0	1	4.288	41	11.676	0	7	0.33	1	2	30	0.29	6	2	0.4	0.95	3.57	450.34	0	14	10.12	2	17	13	77.99	CRIZOTINIB	2011	3.66	4.29	5.04	4.3	450.3	2	6	78	5	21	7	0.33	3
CCOC1=NC2=CC=CC(=C2[N]1CC3=CC=C(C=C3)C4=CC=CC=C4C5=NO[C](=O)[NH]5)C(O)=O	5.09	2.26	7.26	5	0	0 0	0	4.925	59	12.331	0	3	0.12	5	1	34	0.36	9	2	1.67	0.86	5.08	456.46	2	3.51	1.5	0	29	5	123.24	AZILSARTAN KAMEDOXOMIL	2011	3.65	5.18	4.19	4.8	456.5	2	9	123.2	7	25	3	0.12	5
CC#CC[N]1C(=NC2=C1[C](=O)[N](CC3=NC4=CC=CC=C4C(=N3)C)[C](=O)[N]2C)N5CCC[C@@H](N)C5	4.1	2.91	6.91	4	0	1 0	1	1.909	41	13.375	0	10	0.4	4	1	35	0.4	10	1	-0.18	0.41	2.8	472.55	0	14	9.86	1	21	12	116.86	LINAGLIPTIN	2011	2.03	1.91	1.15	3.1	472.5	1	10	116.9	5	25	10	0.4	4
COC1=C(OCC2CCN(C)CC2)C=C3N=CN=C(NC4=C(F)C=C(Br)C=C4)C3=C1	6.85	5.46	8.46	3	0	0 0	0	5.686	0	11.835	0	8	0.36	2	1	30	0.27	6	1	1.96	2.81	4.54	475.36	0	14	9.13	1	16	14	59.51	VANDETANIB	2011	4.72	5.84	5	5.3	475.4	1	6	59.5	6	22	8	0.36	3
CCC[S](=O)(=O)NC1=C(F)C(=C(F)C=C1)C(=O)C2=C[NH]C3=NC=C(C=C23)C4=CC=C(Cl)C=C4	4.84	5.57	9.57	4	0	0 0	0	4.169	0	12.272	0	3	0.13	4	1	33	0.3	6	2	4.62	4.61	4.62	489.92	1	8.87	2.3	0	25	7	91.92	VEMURAFENIB	2011	4.59	4.17	5.54	5.4	489.9	2	6	91.9	7	23	3	0.13	4
CCCSC1=NC2=C(N=N[N]2C3CC(OCCO)C(O)C3O)C(=N1)NC4CC4C5=CC(=C(F)C=C5)F	4.45	2.69	5.69	3	0	6 0	6	3.346	0	13.006	0	13	0.57	8	4	36	0.48	10	4	2.28	2.28	2.28	522.57	0	12.94	1.1	0	15	21	138.44	TICAGRELOR	2011	2.63	2.55	2.01	2.4	522.6	4	10	138.4	10	23	13	0.57	3
CCC1C=C(C)C(O)CC=CC=C(COC2OC(C)C(OC(=O)C3=C(CC)C(=C(O)C(=C3O)Cl)Cl)C(O)C2OC)C(=O)OC(CC=C(C)C=C(C)C1OC4OC(C)(C)C(OC(=O)C(C)C)C(O)C4O)C(C)O				1	0	14 5	19	7.192	51	26.599	40	33	0.63	15	7	72	0.35	18	7	7.85	7.1	8.56	1058.05	0	5.87	0	0	22	50	266.66	FIDAXOMICIN	2011	3.76	7.19	6.23	6.7	1058	7	18	266.7	15	52	33	0.63	1
CC1CNCCC2=CC=C(Cl)C=C12	5.83	2.38	3.38	1	0	1 0	1	3.236	0	5.69	0	5	0.45	0	1	13	0.09	1	1	-0.26	0.22	2.83	195.69	0	14	10.12	1	6	7	12.03	LORCASERIN HYDROCHLORIDE HEMIHYDRATE	2012	2.84	3.24	2.59	2.9	195.7	1	1	12	0	11	5	0.45	1
NC(CC1=CC(=C(O)C=C1)O)C(O)=O	-1.63	-1.03	-0.03	1	0	1 0	1	-2.82	0	4.944	0	2	0.22	4	3	14	0.56	5	4	-1.79	-1.8	-1.79	197.19	1	1.65	9.06	1	8	6	103.78	LEVODOPA	2012	-2.74	-2.82	0.05	-0.25	197.2	4	5	103.8	3	9	2	0.22	1
CC(C(O)=O)C1=CC(=CC=C1)OC2=CC=CC=C2	5.36	1.64	3.64	2	0	1 0	1	3.821	0	6.933	0	2	0.13	3	0	18	0.2	3	1	1.15	0.47	3.65	242.27	1	3.96	0	0	14	4	46.53	FENOPROFEN CALCIUM	2012	3.1	3.82	3.67	3.2	242.3	1	3	46.5	4	15	2	0.13	2
CC1=C2NC(=O)C3=C(N=CC=C3)N(C4CC4)C2=NC=C1	4.06	3.78	5.78	2	0	0 0	0	2.65	0	7.555	0	4	0.27	3	1	20	0.33	5	1	2.49	2.49	2.49	266.3	0	14	3.28	0	14	6	58.12	NEVIRAPINE HEMIHYDRATE	2012	1.03	2.65	2.65	1.3	266.3	1	5	58.1	1	15	4	0.27	2
CN1C(=O)CC(=O)N(C2=CC=CC=C2)C3=C1C=CC(=C3)Cl	5.27	3.52	5.52	2	0	0 0	0	2.438	0	8.178	0	2	0.13	2	0	21	0.25	4	0	1.79	0.97	2.55	300.74	0	5.82	0	0	16	5	40.62	CLOBAZAM	2012	2.12	2.44	3.37	2.5	300.7	0	4	40.6	1	16	2	0.13	2
CCOC(=O)NC1=C(N)C=C(NCC2=CC=C(F)C=C2)C=C1	3.79	3.92	5.92	2	0	0 0	0	2.003	0	8.365	0	3	0.19	1	3	22	0.31	5	3	2.7	2.7	2.7	303.34	0	13.6	3.99	0	14	8	76.38	EZOGABINE	2012	2.42	2	3.59	3.1	303.3	3	5	76.4	7	16	3	0.19	2
N[S](=O)(=O)C1=CC(=C(Cl)C(=C1)[S](N)(=O)=O)Cl	1.14	2.43	3.43	1	0	0 0	0	0.241	0	6.154	0	0	0	4	2	16	1.33	6	2	0.38	0.29	0.39	305.14	0	7.94	0	0	10	4	120.32	DICHLORPHENAMIDE	2012	0.23	0.24	0.29	0.41	305.2	2	6	120.3	2	6	0	0	1
C[C@@H]1CCN(C[C@@H]1N(C)C2=NC=NC3=C2C=C[NH]3)C(=O)CC#N	2.84	2.36	4.36	2	0	2 0	2	1.551	30	8.632	0	8	0.5	4	1	23	0.44	7	1	0.98	1.19	1.24	312.38	0	9.15	6.44	0	11	10	88.91	TOFACITINIB CITRATE	2012	1.86	1.52	1.55	1.5	312.4	1	7	88.9	5	16	8	0.5	2
CCOC(=O)CCC\C=C/C/C=C\C\C=C/C/C=C\C\C=C/CC	10.4	9.52	9.52	0	0	0 5	5	7.813	51	10.443	0	11	0.5	1	0	24	0.09	2	0	6.73	6.73	6.73	330.51	0	14	0	0	12	12	26.3	ICOSAPENT ETHYL	2012	5.2	7.81	6.47	7.6	330.5	0	2	26.3	15	22	11	0.5	0
CC1=CC=C(C=C1)\C(=C/CN2CCCC2)C3=CC=CC(=N3)\C=C\C(O)=O	3.99	2.07	4.07	2	0	0 2	2	1.461	0	10.648	0	6	0.27	3	0	26	0.18	4	1	1.71	1.69	1.71	348.45	1	3.68	8.63	1	18	8	53.43	ACRIVASTINE	2012	3.42	1.46	4.02	3.7	348.4	1	4	53.4	6	22	6	0.27	2
O=[C]1[N](C=C(C=C1C2=CC=CC=C2C#N)C3=NC=CC=C3)C4=CC=CC=C4	6.01	4.17	8.17	4	0	0 0	0	4.169	10	10.491	0	0	0	3	0	27	0.17	4	0	4.11	4.11	4.11	349.39	0	14	4.01	0	25	0	58.68	PERAMPANEL	2012	3.27	4.17	4.44	3.1	349.4	0	4	58.7	4	23	0	0	4
CN=C(O)C1=CC=CC=C1SC2=CC3=N[NH]C(=C3C=C2)\C=C\C4=CC=CC=N4	5.07	6.13	10.13	4	0	0 2	2	4.465	59	11.691	0	1	0.05	4	2	28	0.27	5	2	4.96	4.83	5.01	386.47	0	7.73	5.14	0	25	3	74.16	AXITINIB	2012	3.56	4.47	5.21	4.3	386.5	2	5	74.2	5	22	1	0.05	4
CC(C)(C)C1=C(O)C=C(NC(=O)C2=C[NH]C3=CC=CC=C3[C]2=O)C(=C1)C(C)(C)C	5.05	5.37	8.37	3	0	0 0	0	3.823	0	11.622	0	8	0.33	3	3	29	0.21	5	3	5.51	4.99	5.76	392.5	0	6.57	0	0	19	10	82.19	IVACAFTOR	2012	4.95	3.82	5.08	5.5	392.5	3	5	82.2	5	24	8	0.33	3
NC1=NC(=CS1)CC(=O)NC2=CC=C(CCNCC(O)C3=CC=CC=C3)C=C2	3.22	2.43	5.43	3	0	1 0	1	1.32	0	11.387	0	5	0.24	3	4	28	0.33	6	4	0	0.7	2.89	396.51	0	14	9.62	1	19	9	100.27	MIRABEGRON	2012	2.21	1.32	2.77	1.8	396.5	4	6	100.3	10	21	5	0.24	3
C[S](=O)(=O)C1=CC(=C(C=C1)C(=O)NC2=CC=C(Cl)C(=C2)C3=CC=CC=N3)Cl	4.58	5.23	8.23	3	0	0 0	0	2.744	0	10.687	0	1	0.05	4	1	27	0.32	5	1	3.93	3.93	3.93	421.29	0	13.5	3.7	0	22	4	76.13	VISMODEGIB	2012	3.46	2.74	4.71	3.9	421.3	1	5	76.1	5	19	1	0.05	3
CC1CN(CC[C@@]1(C)C2=CC(=CC=C2)O)CC(CC3=CC=CC=C3)C(=O)NCC(O)=O	3.98	1.54	3.54	2	0	3 0	3	2.164	0	12.167	0	11	0.44	4	2	31	0.24	6	3	0.82	0.82	0.82	424.54	1	3.71	10.66	1	16	15	89.87	ALVIMOPAN	2012	3.55	2.16	3.05	3.1	424.5	3	6	89.9	9	25	11	0.44	2
CC#C[C@]1(O)CC[C@H]2[C@@H]3CCC4=CC(=O)CCC4=C3C(C[C@]12C)C5=CC=C(C=C5)N(C)C	7.44	8.3	9.3	1	0	5 0	5	4.468	10	12.874	40	16	0.55	2	1	32	0.1	3	1	5.12	5.13	5.13	429.6	0	12.87	4.89	0	12	18	40.54	MIFEPRISTONE	2012	4.88	4.46	5.41	4.8	429.6	1	3	40.5	3	29	16	0.55	1
O[S](=O)(=O)OC1=CC=C(C=C1)C(C2=CC=C(O[S](O)(=O)=O)C=C2)C3=CC=CC=N3	0.64	0.59	3.59	3	0	0 0	0	-0.304	30	10.321	42	1	0.06	7	0	29	0.61	9	2	-1.91	-1.91	-1.52	437.44	2	-2.49	4.08	0	22	5	140.09	SODIUM PICOSULFATE	2012	0.99	-0.3	2.63	-0.87	437.4	2	9	140.1	7	18	1	0.06	3
COC1=CC2=C(C=C1CC3=C(F)C(=CC=C3)Cl)[C](=O)C(=C[N]2[C@H](CO)C(C)C)C(O)=O	6.28	5.17	8.17	3	0	1 0	1	4.559	0	11.602	0	7	0.3	4	1	31	0.26	6	2	4.16	3.41	4.67	447.89	1	6.16	0	0	19	12	88.76	ELVITEGRAVIR	2012	4.37	4.56	4.28	4.6	447.9	2	6	88.8	7	23	7	0.3	3
COC1=CC=C(C=C1)[N]2N=C(C(N)=O)C3=C2C(=O)N(CC3)C4=CC=C(C=C4)N5CCCCC5=O	3.59	4.31	7.31	3	0	0 0	0	1.892	10	12.579	0	7	0.28	4	1	34	0.36	9	1	1.83	1.83	1.83	459.51	0	13.07	0	0	23	11	110.76	APIXABAN	2012	2.28	1.89	2.7	2.5	459.5	1	9	110.8	5	25	7	0.28	3
CNC(=O)C1=C(F)C=C(C=C1)N2C(=S)N(C(=O)C2(C)C)C3=CC=C(C#N)C(=C3)C(F)(F)F	5.87	5.73	7.73	2	0	0 0	0	3.354	59	11.342	0	5	0.24	4	1	32	0.33	6	1	4.16	4.16	4.16	464.44	0	13.05	0	0	18	12	76.44	ENZALUTAMIDE	2012	4.06	3.35	3.99	3.4	464.4	1	6	76.4	6	21	5	0.24	2
CNC(=O)C1=CC(=CC=N1)OC2=CC(=C(NC(=O)NC3=CC=C(Cl)C(=C3)C(F)(F)F)C=C2)F	5.74	5.38	8.38	3	0	0 0	0	5.185	0	11.239	0	2	0.1	4	3	33	0.33	7	3	4.49	4.49	4.49	482.82	0	10.52	2.02	0	22	11	92.35	REGORAFENIB MONOHYDRATE	2012	4.02	5.19	5.69	4.8	482.8	3	7	92.4	9	21	2	0.1	3
COC1=CC2=C(C=C1OC)C(=CC=N2)OC3=CC=C(NC(=O)C4(CC4)C(=O)NC5=CC=C(F)C=C5)C=C3	5.4	5.42	9.42	4	0	0 0	0	4.943	0	13.581	0	5	0.18	4	2	37	0.29	8	2	4.57	4.65	4.66	501.51	0	13.46	5.9	0	26	11	98.78	CABOZANTINIB S-MALATE	2012	4.38	4.94	5.54	4.2	501.5	2	8	98.8	10	28	5	0.18	4
COC1=CC(=C(Cl)C=C1Cl)NC2=C(C=NC3=CC(=C(OC)C=C23)OCCCN4CCN(C)CC4)C#N	6.21	6.42	9.42	3	0	0 0	0	4.937	0	14.163	0	10	0.38	2	1	36	0.31	8	1	2.55	3.37	4.09	530.45	0	14	8.03	1	16	18	82.88	BOSUTINIB MONOHYDRATE	2012	3.93	5.09	5.19	4.7	530.4	1	8	82.9	10	26	10	0.38	3
CN1CCN(CC1)CC2=CC=C(NC(=O)C3=CC(=C(C)C=C3)C#CC4=CN=C5C=CC=N[N]45)C=C2C(F)(F)F	6.88	6.21	10.21	4	0	0 0	0	5.768	0	14.62	0	8	0.28	3	1	39	0.24	7	1	3.81	4.54	4.97	532.57	0	14	7.62	1	23	14	65.77	PONATINIB HYDROCHLORIDE	2012	4.48	5.77	4.46	5.2	532.6	1	7	65.8	8	29	8	0.28	4
COC1=NC2=C(C=C(Br)C=C2)C=C1C(C3=CC=CC=C3)[C@@](O)(CCN(C)C)C4=CC=CC5=C4C=CC=C5	8.88	5.99	10.99	5	0	2 0	2	7.251	51	15.574	0	7	0.22	2	1	37	0.12	4	1	4.75	5.61	7.13	555.52	0	13.61	8.91	1	26	11	45.59	BEDAQUILINE FUMARATE	2012	6.21	7.25	7.13	7.7	555.5	1	4	45.6	8	32	7	0.22	5
CNC(CC(C)C)C(=O)NC1C(O)C2=CC=C(OC3=C(OC4OC(CO)C(O)C(O)C4OC5C[C@](C)(N)C(O)C(C)O5)C6=CC(=C3)C(NC(=O)C(CC(N)=O)NC1=O)C(=O)NC7C(=O)NC(C(O)C8=CC(=C(O6)C=C8)Cl)C(=O)NC(C(O)=O)C9=CC(=CC(=C9C%10=C(O)C=CC7=C%10)O)O)C(=C2)Cl				5	0	18 0	18	-1.142	0	35.653	0	28	0.42	23	18	101	0.5	33	19	-5.67	-4.85	-4.39	1449.27	1	2.99	10.11	2	46	55	530.49	VANCOMYCIN HYDROCHLORIDE	2012	-1.22	-1.14	0.11	0	1449	19	33	530.5	14	66	28	0.42	5
CC(O)[C@@H]1NC(=O)C2CSSCC3NC(=O)C(N)CSSCC(NC(=O)[C@H](CSSC[C@H](NC(=O)CNC1=O)C(=O)NC(CC4=CC=C(O)C=C4)C(O)=O)NC(=O)C(CC5=CC=C(O)C=C5)NC(=O)C(CCC(O)=O)NC3=O)C(=O)NC(CC(N)=O)C(=O)N6CCCC6C(=O)NC(C)C(=O)N2				2	0	14 0	14	-3.12	0	37.994	0	31	0.53	21	17	101	0.71	36	19	-13.23	-13.97	-10.78	1526.73	2	3.06	7.65	1	44	57	573.91	LINACLOTIDE	2012	-0.44	-3.12	-5.94	0	1527	19	36	573.9	14	59	31	0.53	2
COC(=O)\C=C\C(=O)OC	2.77	2.06	2.06	0	0	0 1	1	0.784	0	3.464	0	2	0.33	2	0	10	0.67	4	0	0.72	0.72	0.72	144.13	0	14	0	0	6	4	52.6	DIMETHYL FUMARATE	2013	0.22	0.78	-0.11	0.7	144.1	0	4	52.6	4	6	2	0.33	0
NC1=N[C](=S)C2=C([NH]C=N2)[NH]1	-1.35	1.12	3.12	2	0	0 0	0	-1.882	59	4.611	0	0	0	3	3	11	1.2	5	3	-0.39	-0.4	-0.39	167.19	0	9.17	3.79	0	10	1	83.38	THIOGUANINE	2013	-0.15	-1.88	0.6	-1.2	167.2	3	5	83.4	0	5	0	0	2
CNC1(C)C2CCC(C2)C1(C)C	6.31	2.38	2.38	0	0	3 0	3	2.825	0	5.293	0	11	1	0	1	12	0.09	1	1	-0.84	-0.67	2.37	167.3	0	14	10.88	1	0	12	12.03	MECAMYLAMINE HYDROCHLORIDE	2013	2.96	2.82	2.42	2.2	167.3	1	1	12	1	11	11	1	0
OC(=O)C(S)C(S)C(O)=O	-0.02	-0.9	-0.9	0	0	2 0	2	-1.476	0	4.023	0	2	0.5	4	2	10	1.5	4	2	-3.81	-5.1	0.26	182.21	2	3.37	0	0	4	6	74.6	SUCCIMER	2013	0.54	-1.48	-0.25	-0.44	182.2	2	4	74.6	3	4	2	0.5	0
CCN(CC)CC(=O)NC1=C(C)C=CC=C1C	5.1	4.8	5.8	1	0	0 0	0	1.954	0	7.172	0	7	0.5	1	1	17	0.21	3	1	1.57	2.33	2.84	234.34	0	13.78	7.75	1	8	9	32.34	LIDOCAINE HYDROCHLORIDE	2013	2.41	1.95	2.58	2.7	234.3	1	3	32.3	6	14	7	0.5	1
CCN(CC)C(=O)[C@]1(CC1CN)C2=CC=CC=C2	4.76	1.19	2.19	1	0	2 0	2	1.906	41	7.498	0	8	0.53	1	1	18	0.2	3	1	-1.43	-0.91	1.42	246.35	0	14	9.83	1	8	10	46.33	LEVOMILNACIPRAN HYDROCHLORIDE	2013	1.59	1.91	1.77	0.9	246.3	1	3	46.3	6	15	8	0.53	1
C\C(O)=C(/C#N)C(=O)NC1=CC=C(C=C1)C(F)(F)F	3.76	3.12	4.12	1	0	0 1	1	2.132	0	6.14	0	2	0.17	3	2	19	0.33	4	2	1.08	0.23	2.14	270.21	0	5.48	0	0	10	7	73.12	TERIFLUNOMIDE	2013	3.19	2.13	3	3.9	270.2	2	4	73.1	5	12	2	0.17	1
NC1=CC=CC2=C1C(=O)N(C3CCC(=O)NC3=O)C2=O	1.05	-0.19	0.81	1	0	1 0	1	-0.189	20	6.829	0	3	0.23	4	2	20	0.54	7	2	-0.16	-0.16	-0.16	273.25	0	11.59	1.56	0	14	6	109.57	POMALIDOMIDE	2013	-0.12	-0.19	-0.33	0.05	273.2	2	7	109.6	1	13	3	0.23	1
CC1=CC=C(C=C1)\C(=C/CN2CCCC2)C3=CC=CC=N3	6.4	4.16	6.16	2	0	0 1	1	3.634	0	8.941	0	6	0.32	1	0	21	0.11	2	0	1.92	2.79	4.05	278.4	0	14	8.64	1	14	7	16.13	TRIPROLIDINE HYDROCHLORIDE	2013	3.37	3.63	3.92	3.6	278.4	0	2	16.1	4	19	6	0.32	2
CC1=CC(=C(SC2=CC=CC=C2N3CCNCC3)C=C1)C	7.07	4.99	6.99	2	0	0 0	0	4.92	0	9.349	0	6	0.33	0	1	21	0.17	2	1	2.46	3.31	4.76	298.45	0	14	8.85	1	12	9	15.27	VORTIOXETINE HYDROBROMIDE	2013	4.36	4.92	3.86	4.8	298.4	1	2	15.3	3	18	6	0.33	2
C[N]1[C](=O)C=C(N2CCCC(N)C2)[N](CC3=C(C=CC=C3)C#N)[C]1=O	3.42	1.7	3.7	2	0	1 0	1	0.989	41	9.488	0	7	0.39	3	1	25	0.39	7	1	-1.54	-0.87	1.16	339.4	0	14	9.47	1	14	9	97.05	ALOGLIPTIN BENZOATE	2013	1.07	0.99	0.39	1.5	339.4	1	7	97.1	4	18	7	0.39	2
OCCOC1=CC=C(C=C1)\C(=C(\CCCl)C2=CC=CC=C2)C3=CC=CC=C3	8.13	7.52	10.52	3	0	0 1	1	5.559	0	11.418	0	4	0.17	1	1	27	0.08	2	1	5.56	5.56	5.56	378.9	0	14	0	0	20	7	29.46	OSPEMIFENE	2013	5.73	5.56	5.65	5.7	378.9	1	2	29.5	8	24	4	0.17	3
CC1CCO[C@H]2C[N]3C=C(C(=O)NCC4=CC=C(F)C=C4F)[C](=O)C(=C3C(=O)N12)O	1.94	2.43	4.43	2	0	2 0	2	-0.407	30	10.167	0	7	0.35	5	2	30	0.4	8	2	1.1	1.1	1.1	419.38	0	10.1	0	0	17	13	100.87	DOLUTEGRAVIR SODIUM	2013	1.59	-0.41	1.35	0.76	419.4	2	8	100.9	4	20	7	0.35	2
COC(=O)N(C)C1=C(N)N=C(N=C1N)C2=N[N](CC3=C(F)C=CC=C3)C4=C2C=CC=N4	3.07	3.09	7.09	4	0	0 0	0	1.844	40	11.15	0	3	0.15	5	2	31	0.5	10	2	2.69	2.69	2.69	422.42	0	14	3.5	0	23	8	138.07	RIOCIGUAT	2013	1.81	1.65	2.44	2.3	422.4	2	10	138.1	6	20	3	0.15	4
NC1=NC=NC2=C1C(=N[N]2C3CCCN(C3)C(=O)C=C)C4=CC=C(OC5=CC=CC=C5)C=C4	5.15	4.92	8.92	4	0	1 0	1	4.069	30	12.705	0	5	0.2	5	1	33	0.32	8	1	3.63	3.63	3.63	440.51	0	14	4.06	0	25	8	99.16	IBRUTINIB	2013	3.14	4.07	4.22	4	440.5	1	8	99.2	6	25	5	0.2	4
CC1=CC=C(C=C1CC2=CC=C(S2)C3=CC=C(F)C=C3)[C@@H]4OC(CO)C(O)C(O)C4O	5.92	3.78	6.78	3	0	5 0	5	4.552	0	11.834	0	8	0.33	5	4	31	0.25	5	4	3.52	3.52	3.52	444.52	0	12.58	0	0	17	14	90.15	CANAGLIFLOZIN	2013	2.58	4.55	2.97	3.3	444.5	4	5	90.2	5	24	8	0.33	3
COC1=C(Cl)C=C(CNC2=C(C=NC(=N2)N3CCCC3CO)C(=O)NCC4=NC=CC=N4)C=C1	3.4	2.99	5.99	3	0	1 0	1	2.357	30	12.803	0	8	0.35	6	3	34	0.43	10	3	2.74	2.77	2.78	483.96	0	13.73	5.54	0	20	14	125.39	AVANAFIL	2013	3.32	2.36	2.43	1.2	484	3	10	125.4	10	23	8	0.35	3
CN(C)CC=CC(=O)NC1=C(OC2CCOC2)C=C3N=CN=C(NC4=CC(=C(F)C=C4)Cl)C3=C1	4.79	3.34	6.34	3	0	1 1	2	4.34	0	12.932	0	7	0.29	4	2	34	0.33	8	2	1.47	2.34	3.76	485.94	0	12.49	8.81	1	20	14	88.61	AFATINIB	2013	4.16	4.49	4.39	4.1	485.9	2	8	88.6	9	24	7	0.29	3
CC(C)(C)C1=NC(=C(S1)C2=NC(=NC=C2)N)C3=C(F)C(=CC=C3)N[S](=O)(=O)C4=C(F)C=CC=C4F	5.65	4.54	8.54	4	0	0 0	0	4.61	0	12.91	0	4	0.17	5	1	35	0.39	7	2	5.38	5.1	5.46	519.56	1	7.16	2.91	0	25	9	110.86	DABRAFENIB MESYLATE	2013	4.83	4.61	5.37	5.3	519.6	2	7	110.9	6	23	4	0.17	4
CC(C)OC(=O)C(C)N[P@](=O)(OCC1OC([N]2C=C[C](=O)[NH][C]2=O)[C@](C)(F)C1O)OC3=CC=CC=C3		3.55	5.55	2	0	6 0	6	0.844	0	12.568	42	11	0.5	7	3	36	0.55	12	3	1.28	1.28	1.28	529.46	0	9.7	0	0	18	18	158.18	SOFOSBUVIR	2013	1.19	0.84	1.66	0.61	529.5	3	12	158.2	11	22	11	0.5	2
CCCN[S](=O)(=O)NC1=C(C(=NC=N1)OCCOC2=NC=C(Br)C=N2)C3=CC=C(Br)C=C3	4.8	4.96	7.96	3	0	0 0	0	4.3	41	12.656	0	5	0.26	6	1	32	0.58	10	2	3.66	3.55	3.69	588.28	1	7.76	2.26	0	20	11	128.22	MACITENTAN	2013	3.85	4.3	3.57	5.3	588.3	2	10	128.2	11	19	5	0.26	3
C[N]1[C](=O)C(=C2[N]([C](=O)[N](C3CC3)[C](=O)C2=C1NC4=CC=C(I)C=C4F)C5=CC(=CC=C5)NC(C)=O)C	5.5	4.91	8.91	4	0	0 0	0	4.835	40	14.609	0	6	0.23	4	2	37	0.35	9	2	3.18	3.18	3.18	615.4	0	12.61	0	0	27	10	107.13	TRAMETINIB DIMETHYL SULFOXIDE	2013	3.68	4.99	3.94	4.6	615.4	2	9	107.1	6	26	6	0.23	4
FC(F)(F)CNC(=O)C1(CCCCN2CCC(CC2)NC(=O)C3=C(C=CC=C3)C4=CC=C(C=C4)C(F)(F)F)C5=CC=CC=C5C6=CC=CC=C16	8.97	5.86	9.86	4	0	0 0	0	7.001	51	18.168	0	13	0.33	2	2	50	0.13	5	2	5.4	6.25	7.9	693.73	0	12.27	9.05	1	28	22	61.44	LOMITAPIDE MESYLATE	2013	6.54	7	8.38	8.7	693.7	2	5	61.4	14	39	13	0.33	4
COC1=C(C)C2=NC(=CC(=C2C=C1)O[C@@H]3C[C@@H]4[C@@H](C3)C(=O)N(C)CCCC\C=C/[C@@H]5C[C@]5(N=C4O)C(O)=N[S](=O)(=O)C6CC6)C7=NC(=CS7)C(C)C	7.24	4.14	7.14	3	0	5 3	8	5.955	59	19.95	0	21	0.55	9	2	52	0.37	12	2	3.92	2.38	5.74	749.94	0	5	1.7	0	25	26	163.87	SIMEPREVIR	2013	4.54	5.95	6.94	7.8	749.9	2	12	163.9	8	38	21	0.55	3
CC1=C[N]([C](=O)C=C1)C2=CC=CC=C2	5.23	3.11	5.11	2	0	0 0	0	2.402	10	5.666	0	1	0.08	1	0	14	0.17	2	0	2.14	2.14	2.14	185.23	0	14	0	0	13	1	22	PIRFENIDONE	2014	1.5	2.4	2.15	1.8	185.2	0	2	22	1	12	1	0.08	2
NC(C(O)C1=CC(=C(O)C=C1)O)C(O)=O	-2.06	-1.89	-0.89	1	0	2 0	2	-2.484	0	5.097	0	2	0.22	5	4	15	0.67	6	5	-2.71	-2.73	-2.71	213.19	1	1.46	8.72	1	8	7	124.01	DROXIDOPA	2014	-2.8	-2.48	-0.46	-1.4	213.2	5	6	124	3	9	2	0.22	1
CC(C)(C1=CN=CC=C1)C(=O)C2=CN=CC=C2	4.09	3.18	5.18	2	0	0 0	0	1.459	41	6.668	0	3	0.21	3	0	17	0.21	3	0	2.02	2.03	2.03	226.28	0	14	4.87	0	14	3	42.85	METYRAPONE	2014	1.84	1.46	2.64	1.6	226.3	0	3	42.9	3	14	3	0.21	2
ClCCN(N=O)C(=O)NC1CCCCC1	4.85	4.64	4.64	0	0	0 0	0	2.755	0	5.897	0	8	0.89	3	1	15	0.56	5	1	2.16	2.16	2.16	233.7	0	14	0	0	4	11	61.77	LOMUSTINE	2014	2.83	2.75	2.25	2.6	233.7	1	5	61.8	6	9	8	0.89	0
CCC(O)=NC[C@@H]1C[C@H]1C2=C3CCOC3=CC=C2	5.45	4.39	5.39	1	0	2 1	3	2.851	59	7.046	0	8	0.53	2	1	18	0.2	3	1	2.01	1.35	2.22	245.32	0	4.41	6.46	0	8	10	41.82	TASIMELTEON	2014	3.38	2.85	3.09	3.6	245.3	1	3	41.8	4	15	8	0.53	1
CC(=O)OC1CC2=CC=CC=C2N(C(N)=O)C3=CC=CC=C13	3.98	3.92	5.92	2	0	1 0	1	1.503	0	8.303	0	3	0.18	2	1	22	0.29	5	1	2.17	2.17	2.17	296.33	0	14	0	0	16	6	72.63	ESLICARBAZEPINE ACETATE	2014	2.35	1.5	3.06	2.3	296.3	1	5	72.6	3	17	3	0.18	2
C[C@]12CC[C@H]3[C@@H](CCC4=C3C=CC(=C4)O)[C@@H]1CC[C@@]2(O)C#C	5.93	4.51	5.51	1	0	5 0	5	3.684	0	8.753	0	12	0.6	2	2	22	0.1	2	2	3.9	3.9	3.9	296.41	0	10.33	0	0	6	14	40.46	ETHINYL ESTRADIOL	2014	3.67	3.86	3.61	3.5	296.4	2	2	40.5	1	20	12	0.6	1
COC1=C(C\C=C(/C)CCC(O)=O)C(=C2C(=O)OCC2=C1C)O	4.38	1.65	2.65	1	0	0 1	1	2.291	0	8.271	0	7	0.41	4	1	23	0.35	6	2	0.7	0.17	3.53	320.34	1	3.57	0	0	12	11	93.06	MYCOPHENOLIC ACID	2014	2.68	2.29	2.73	3.2	320.3	2	6	93.1	6	17	7	0.41	1
CCCCCCCC(O)=N[C@H](CN1CCCC1)[C@H](O)C2=CC3=C(OCCO3)C=C2	6.79	4.21	5.21	1	0	2 1	3	5.323	59	11.391	0	16	0.7	3	2	29	0.26	6	2	1.45	1.45	1.46	404.55	0	5.21	8.87	1	8	21	74.52	ELIGLUSTAT	2014	3.8	5.32	4.27	4.4	404.5	2	6	74.5	11	23	16	0.7	1
CCCCCCCCCCCCCCCCO[P](O)(=O)OCC[N+](C)(C)C		5.5	5.5	0	1	1 0	1	3.543	40	11.625	0	21	1	3	0	27	0.24	5	1	4.27	4.27	2.25	408.58	1	1.88	0	1	2	25	55.76	MILTEFOSINE	2014	5.99	3.39	6.31	1.4	408.6	1	5	55.8	20	21	21	1	0
CC[C@H](NC1=NC=NC2=C1N=C[NH]2)C3=NC4=CC=CC(=C4[C](=O)[N]3C5=CC=CC=C5)F	4.24	3.74	8.74	5	0	1 0	1	3.62	10	11.45	0	3	0.14	5	2	31	0.36	8	2	3.36	3.36	3.36	415.43	0	9.86	3.23	0	26	5	101.38	IDELALISIB	2014	3.73	3.62	3.75	2.9	415.4	2	8	101.4	5	22	3	0.14	5
OC(C1=CC=CC=C1)(C2=CC=CC=C2)C34CC[N+](CCOCC5=CC=CC=C5)(CC3)CC4	5.88	5.02	8.02	3	1	0 0	0	1.6	30	13.222	0	11	0.38	2	1	32	0.1	3	1	0.68	0.68	0.68	428.6	0	13.04	0	1	18	14	29.46	UMECLIDINIUM BROMIDE	2014	4.61	1.6	5.14	1.6	428.6	1	3	29.5	8	29	11	0.38	3
OC1=NN=C(CC2=CC(=C(F)C=C2)C(=O)N3CCN(CC3)C(=O)C4CC4)C5=CC=CC=C15	4.24	4.39	7.39	3	0	0 0	0	2.437	30	11.766	0	8	0.33	5	1	32	0.29	7	1	2.31	2.3	2.32	434.47	0	8.75	2.21	0	20	12	86.63	OLAPARIB	2014	2.53	2.44	2.76	1.6	434.5	1	7	86.6	6	24	8	0.33	3
C[N]1N=NC(=N1)C2=CC=C(C=N2)C3=CC=C(C=C3F)N4CC(CO[P](O)(O)=O)OC4=O		1.53	4.53	3	0	1 0	1	-0.505	20	10.261	0	4	0.24	8	0	31	0.71	12	2	-0.7	-1.38	1.97	450.32	2	1.35	0	0	21	10	152.79	TEDIZOLID PHOSPHATE	2014	1.39	0.35	1.51	1.9	450.3	2	12	152.8	6	17	4	0.24	3
OC[C@H]1O[C@H]([C@H](O)[C@@H](O)[C@@H]1O)C2=CC(=C(Cl)C=C2)CC3=CC=C(O[C@H]4CCOC4)C=C3	4.23	3.04	5.04	2	0	6 0	6	2.585	0	11.51	0	11	0.48	6	4	31	0.3	7	4	1.66	1.66	1.66	450.91	0	12.57	0	0	12	19	108.61	EMPAGLIFLOZIN	2014	1.69	2.59	1.61	1.8	450.9	4	7	108.6	6	23	11	0.48	2
C[C@@H]1CCN(CCN1C(=O)C2=C(C=CC(=C2)C)[N]3N=CC=N3)C4=NC5=C(O4)C=CC(=C5)Cl	6.3	5.61	9.61	4	0	1 0	1	4.791	40	12.207	0	7	0.3	4	0	32	0.35	8	0	4.04	4.04	4.04	450.93	0	14	0.19	0	22	10	80.29	SUVOREXANT	2014	4	4.79	4.11	5.9	450.9	0	8	80.3	4	23	7	0.3	4
CCOC1=C(OC)C=CC(=C1)[C@@H](C[S](C)(=O)=O)N2C(=O)C3=C(C2=O)C(=CC=C3)N=C(C)O	3.33	3.51	5.51	2	0	1 1	2	1.141	41	11.624	0	7	0.32	6	1	32	0.45	9	1	-0.29	-1.14	1.39	460.5	0	4.83	0	0	20	11	122.57	APREMILAST	2014	1.75	1.14	3.08	1.9	460.5	1	9	122.6	8	22	7	0.32	2
CCOC(O)=N[C@@H]1CC[C@@H]2[C@@H](C1)C[C@@H]3[C@@H]([C@@H](C)OC3=O)[C@H]2\C=C\C4=NC=C(C=C4)C5=CC(=CC=C5)F	6.39	7.32	9.32	2	0	7 2	9	4.386	59	13.557	0	14	0.48	5	1	36	0.21	6	1	2.49	2.32	4.02	492.59	0	1.07	4.35	0	18	18	81.01	VORAPAXAR SULFATE	2014	4.8	4.39	5.83	5.9	492.6	1	6	81	6	29	14	0.48	2
COC(=O)C1=CC2=C(C=C1)\C(C(=N2)O)=C(\NC3=CC=C(C=C3)N(C)C(=O)CN4CCN(C)CC4)C5=CC=CC=C5	4.27	4.25	7.25	3	0	0 1	1	2.664	59	15.708	0	8	0.26	4	2	40	0.29	9	2	1.6	2.18	2.4	539.64	0	-2.98	15	1	26	14	97.71	NINTEDANIB	2014	2.77	2.66	4.27	4	539.6	2	9	97.7	9	31	8	0.26	3
CC(C)OC1=C(NC2=NC(=C(Cl)C=N2)NC3=CC=CC=C3[S](=O)(=O)C(C)C)C=C(C)C(=C1)C4CCNCC4	6.54	4.58	7.58	3	0	0 0	0	6.413	0	15.3	0	12	0.43	4	3	38	0.32	8	3	2.88	3.38	5.81	558.14	0	11.58	10.07	1	20	17	105.24	CERITINIB	2014	5.32	6.71	6.36	6.5	558.1	3	8	105.2	9	28	12	0.43	3
CN1CCN(CC1)C2=NC=C(N(C)C(=O)C(C)(C)C3=CC(=CC(=C3)C(F)(F)F)C(F)(F)F)C(=C2)C4=CC=CC=C4C	9.32	9.25	12.25	3	0	0 0	0	6.505	41	14.587	0	12	0.4	1	0	41	0.17	5	0	6.12	6.84	7.26	578.6	0	14	7.6	1	20	21	39.68	NETUPITANT	2014	5.15	6.51	6.79	6.7	578.6	0	5	39.7	8	30	12	0.4	3
CC(C)C1=NC(=CS1)CN(C)C(=O)NC(CCN2CCOCC2)C(=O)NC(CCC(CC3=CC=CC=C3)NC(=O)OCC4=CN=CS4)CC5=CC=CC=C5	5.85	6.08	10.08	4	0	3 0	3	3.979	41	21.701	0	19	0.48	6	3	54	0.35	12	3	4.58	4.91	4.99	776.03	0	14	6.69	1	28	26	138.02	COBICISTAT	2014	5.29	3.98	6	5.3	776	3	12	138	24	40	19	0.48	4
COC(O)=N[C@@H](C(C)C)C(=O)N1CC2(CC2)C[C@H]1C3=NC=C([NH]3)C4=CC5=C(C=C4)C6=C(C=C(C=C6)C7=CC8=C(C=C7)N=C([NH]8)[C@@H]9[C@H]%10CC[C@H](C%10)N9C(=O)[C@@H](N=C(O)OC)C(C)C)C5(F)F	6.79	5.89	10.89	5	0	6 2	8	6.776	59	23.93	0	23	0.47	10	4	65	0.29	14	4	3.86	2.37	5.91	889.02	0	2.12	5.84	0	34	31	181.62	LEDIPASVIR	2014	5.01	6.78	9.02	9	889	4	14	181.6	14	49	23	0.47	5
CCC1=C(C)[NH]C2=C1C(=O)C(CC2)CN3CCOCC3	4.6	2.98	3.98	1	0	1 0	1	2.572	0	7.886	0	11	0.69	2	1	20	0.25	4	1	1.65	1.96	2.04	276.38	0	14	6.65	1	7	13	45.33	MOLINDONE HYDROCHLORIDE	2015	2.14	2.57	1.96	1.6	276.4	1	4	45.3	3	16	11	0.69	1
OCC1OC(CC1O)[N]2C=C([C](=O)[NH][C]2=O)C(F)(F)F	0.92	0.61	1.61	1	0	3 0	3	-0.413	0	5.804	0	6	0.6	5	3	20	0.7	7	3	-0.76	-0.79	-0.75	296.2	0	8.5	0	0	8	12	104.55	TRIFLURIDINE	2015	-0.47	-0.41	-0.8	-0.84	296.2	3	7	104.5	3	10	6	0.6	1
CC1=C(CCNCC2=CC=C(\C=C\C(O)=N\O)C=C2)C3=CC=CC=C3[NH]1	3.9	1.3	4.3	3	0	0 2	2	2.663	41	11.013	0	4	0.19	3	4	26	0.24	5	4	1.52	1.55	1.54	349.43	0	5.45	9.72	1	19	7	80.64	PANOBINOSTAT LACTATE	2015	3.68	2.66	4.17	4.6	349.4	4	5	80.6	7	21	4	0.19	3
CC(C)C[C@H](N=C(O)CN=C(O)C1=C(Cl)C=CC(=C1)Cl)B(O)O				1	0	1 2	3	2.631	59	8.962	42	6	0.43	6	4	23	0.43	6	4	1.33	0.35	4.27	361.03	0	3.47	1.63	0	10	13	105.64	IXAZOMIB CITRATE	2015	3.13	2.63	2.68	4.4	361	4	6	105.6	7	14	6	0.43	1
CC(=O)OCC1OC(C(OC(C)=O)C1OC(C)=O)[N]2C=C[C](=O)[NH][C]2=O	0.96	2.29	3.29	1	0	4 0	4	-0.267	0	8.336	0	8	0.53	6	1	26	0.73	11	1	-1.09	-1.09	-1.09	370.31	0	9.7	0	0	14	12	142.99	URIDINE TRIACETATE	2015	0	-0.27	-1.14	-0.62	370.3	1	11	143	8	15	8	0.53	1
FC(F)(F)C1=CC(=CC=C1)N2CCN(CC2)CC[N]3[C](=O)[NH]C4=CC=CC=C34	6.41	6.3	9.3	3	0	0 0	0	4.733	0	10.172	0	7	0.35	1	1	28	0.25	5	1	3.18	3.67	3.83	390.41	0	12.91	7.03	1	16	12	44.27	FLIBANSERIN	2015	3.31	4.73	3.17	3.7	390.4	1	5	44.3	5	20	7	0.35	3
C[C@H](CCC(O)=O)[C@H]1CC[C@H]2[C@@H]3[C@H](O)C[C@@H]4C[C@H](O)CC[C@]4(C)[C@H]3C[C@H](O)[C@]12C	4.38	2.17	2.17	0	0	11 0	11	2.427	0	11.247	0	23	0.96	5	3	29	0.21	5	4	0.47	-0.35	2.48	408.58	1	4.48	0	0	2	27	97.99	CHOLIC ACID	2015	3.31	2.43	3.45	3.4	408.6	4	5	98	4	24	23	0.96	0
CCOC(=O)[C@H](C)C[C@@H](CC1=CC=C(C=C1)C2=CC=CC=C2)NC(=O)CCC(O)=O	5.69	3.13	5.13	2	0	2 0	2	4.469	0	11.547	0	9	0.38	4	1	30	0.25	6	2	1.49	0.74	3.79	411.5	1	4.18	0	0	18	12	92.7	SACUBITRIL	2015	3.34	4.47	3.84	3.7	411.5	2	6	92.7	13	24	9	0.38	2
COC1=C(C=C2C(=CC=NC2=C1)OC3=CC(=C(NC(O)=NC4CC4)C=C3)Cl)C(O)=N	4.2	3.37	6.37	3	0	0 1	1	3.323	59	11.177	0	4	0.19	6	4	30	0.38	8	4	1.86	0.77	2.16	426.86	0	4.5	6.1	0	20	10	120.05	LENVATINIB	2015	2.77	3.32	5.06	3.6	426.9	4	8	120	7	21	4	0.19	3
CN(C)C(=O)NC1CCC(CC1)CCN2CCN(CC2)C3=C(Cl)C(=CC=C3)Cl	7.01	7.14	8.14	1	0	0 0	0	4.98	20	11.784	0	14	0.67	1	1	28	0.24	5	1	2.64	3.43	4.06	427.41	0	14	7.91	1	8	20	38.82	CARIPRAZINE	2015	4.5	4.98	4.34	4.6	427.4	1	5	38.8	7	21	14	0.67	1
O=[C]1[NH]C2=CC(=CC=C2C=C1)OCCCCN3CCN(CC3)C4=C5C=CSC5=CC=C4	5.95	5.26	9.26	4	0	0 0	0	4.652	0	12.81	0	8	0.32	1	1	31	0.24	5	1	2.76	3.61	4.65	433.57	0	13.56	8.4	1	20	11	48.57	BREXPIPRAZOLE	2015	4.34	4.65	4.72	5	433.6	1	5	48.6	7	25	8	0.32	4
COC1=C(OCCCN2CCOCC2)C=C3C(=NC=NC3=C1)NC4=CC(=C(F)C=C4)Cl	6.25	5.74	8.74	3	0	0 0	0	5.452	0	11.702	0	8	0.36	3	1	31	0.32	7	1	3.24	3.64	3.75	446.91	0	14	6.85	1	16	15	68.74	GEFITINIB	2015	4.07	5.6	4.28	4.3	446.9	1	7	68.7	8	22	8	0.36	3
CC(=O)C1=C(C)C2=CN=C(NC3=NC=C(C=C3)N4CCNCC4)N=C2[N](C5CCCC5)[C]1=O	3.37	3.7	6.7	3	0	0 0	0	2.195	0	12.609	0	11	0.46	5	2	33	0.38	9	2	0.46	1.3	2.77	447.54	0	11.34	8.86	1	19	14	105.04	PALBOCICLIB	2015	2.64	2.35	2.97	3.4	447.5	2	9	105	5	24	11	0.46	3
CC1=CC=C(NC(=O)C2(CC2)C3=CC=C4OC(F)(F)OC4=C3)N=C1C5=CC(=CC=C5)C(O)=O	6.08	3.34	6.34	3	0	0 0	0	6.054	0	11.362	0	5	0.21	4	1	33	0.29	7	2	3.78	3.09	5.77	452.41	1	4.17	3.5	0	22	11	97.75	LUMACAFTOR	2015	3.48	6.05	4.75	6.3	452.4	2	7	97.8	6	24	5	0.21	3
COC1=C(OC)C=C2CC(=O)N(CCCN(C)CC3CC4=CC(=C(OC)C=C34)OC)CCC2=C1	5.73	3.17	5.17	2	0	1 0	1	3.266	41	13.188	0	14	0.52	1	0	34	0.26	7	0	-0.05	0.76	2.72	468.59	0	14	9.37	1	14	20	60.47	IVABRADINE HYDROCHLORIDE	2015	3.57	3.27	3.31	3	468.6	0	7	60.5	10	27	14	0.52	2
CCC1=CC2=C(C=C1N3CCC(CC3)N4CCOCC4)C(C)(C)C5=C(C2=O)C6=C([NH]5)C=C(C=C6)C#N	6.98	7.04	10.04	3	0	0 0	0	5.533	0	14.146	0	14	0.47	3	1	36	0.2	6	1	4.29	4.75	4.89	482.63	0	12.18	6.97	1	17	17	72.36	ALECTINIB HYDROCHLORIDE	2015	5.36	5.53	4.77	5.2	482.6	1	6	72.4	4	30	14	0.47	3
C[C@@H]1CN(C[C@H](C)O1)C2=CC=C(NC(=O)C3=CC=CC(=C3C)C4=CC=C(OC(F)(F)F)C=C4)C=N2	7.39	7.22	10.22	3	0	2 0	2	5.84	0	12.623	0	8	0.31	2	1	35	0.23	6	1	6.72	6.75	6.76	485.51	0	14	5.45	1	20	15	63.69	SONIDEGIB PHOSPHATE	2015	5.19	5.84	5.82	6.8	485.5	1	6	63.7	7	26	8	0.31	3
CC(C)N(CCCCOCC(=O)N[S](C)(=O)=O)C1=NC(=C(N=C1)C2=CC=CC=C2)C3=CC=CC=C3	5.91	4.25	7.25	3	0	0 0	0	4.176	0	13.726	0	9	0.35	6	1	35	0.35	8	1	2.83	2.82	3.76	496.63	1	3.77	1.41	0	22	12	101.49	SELEXIPAG	2015	4.36	4.18	3.9	4.7	496.6	1	8	101.5	13	26	9	0.35	3
COC1=C(NC2=NC=CC(=N2)C3=C[N](C)C4=C3C=CC=C4)C=C(NC(=O)C=C)C(=C1)N(C)CCN(C)C	5.17	4.09	8.09	4	0	0 0	0	4.604	0	14.758	0	7	0.25	3	2	37	0.32	9	2	2.15	3.01	4.49	499.62	0	13.68	8.87	1	25	12	87.55	OSIMERTINIB	2015	3.6	4.75	4.51	4.5	499.6	2	9	87.6	11	28	7	0.25	4
CC(OC[C@]1(CC[C@]2(CCC(=O)N2)CN1)C3=CC=CC=C3)C4=CC(=CC(=C4)C(F)(F)F)C(F)(F)F	6.78	6.61	8.61	2	0	3 0	3	4.707	0	11.894	0	12	0.48	2	2	35	0.16	4	2	3.21	4.05	5	500.49	0	14	8.3	1	14	21	50.36	ROLAPITANT HYDROCHLORIDE	2015	4.28	4.71	5.73	5.1	500.5	2	4	50.4	7	25	12	0.48	2
OC1(CN(C1)C(=O)C2=C(NC3=C(F)C=C(I)C=C3)C(=C(F)C=C2)F)C4CCCCN4	6.29	3.65	5.65	2	0	1 0	1	5.114	0	11.667	0	8	0.38	2	3	30	0.24	5	3	2.09	2.73	5.04	531.32	0	13.37	9.76	1	14	16	64.6	COBIMETINIB FUMARATE	2015	3.12	5.26	3.78	3.7	531.3	3	5	64.6	5	21	8	0.38	2
CN1CCC2=C(C1)SC(=N2)C(=O)NC3CC(CCC3NC(=O)C(=O)NC4=NC=C(Cl)C=C4)C(=O)N(C)C	1.83	3.08	5.08	2	0	3 0	3	0.152	59	14.13	0	12	0.5	6	3	37	0.5	11	3	0.68	0.87	0.9	548.06	0	10.74	6.33	1	19	18	136.63	EDOXABAN TOSYLATE	2015	0.8	0.15	1.29	1.5	548.1	3	11	136.6	10	24	12	0.5	2
COC1=CC=C(CN(C(C)C2=NC(=C[NH]2)C3=CC=CC=C3)C(=O)C(N)CC4=C(C)C=C(C=C4C)C(N)=O)C=C1C(O)=O	1.92	0.82	4.82	4	0	2 0	2	0.72	42	16.062	0	8	0.25	5	3	42	0.31	10	4	1.81	1.75	1.8	569.66	1	3.66	7.99	1	29	13	164.63	ELUXADOLINE	2015	0.76	0.72	4.16	3.3	569.7	4	10	164.6	12	32	8	0.25	4
COCCOCCOCCOCCOCCOCCOCCOC1CC[C@@]2(O)C3CC4=CC=C(O)C5=C4[C@@]2(CCN3CC=C)C1O5	3.28	2.43	3.43	1	0	5 0	5	0.161	0	16.993	0	26	0.76	10	2	46	0.35	12	2	-0.52	0.34	1.36	651.79	0	10.14	8.54	1	8	38	126.77	NALOXEGOL OXALATE	2015	1.33	0.44	1.86	0.99	651.8	2	12	126.8	24	34	26	0.76	1
CNCC(=O)OCC1=C(N=CC=C1)N(C)C(=O)OC(C)[N+]2=C[N](C[C@@](O)([C@@H](C)C3=NC(=CS3)C4=CC=C(C=C4)C#N)C5=C(F)C=CC(=C5)F)N=C2	2.64	5.51	10.51	5	1	3 0	3	-1.153	40	18.559	0	10	0.29	7	2	51	0.4	13	2	0.25	0.48	0.52	717.77	0	12.55	6.45	2	32	17	159.37	ISAVUCONAZONIUM SULFATE	2015	3.96	-1.15	4.59	2.5	717.8	2	13	159.4	17	35	10	0.29	5
COC(=O)NC(C(C)C)C(=O)N1CCCC1C2=NC=C([NH]2)C3=CC=C(C=C3)C4=CC=C(C=C4)C5=CN=C([NH]5)C6CCCN6C(=O)C(NC(=O)OC)C(C)C	5.22	5.97	9.97	4	0	4 0	4	4.722	30	20.432	0	18	0.45	6	4	54	0.35	14	4	4.04	4.16	4.18	738.89	0	11.15	6.09	0	30	24	174.64	DACLATASVIR DIHYDROCHLORIDE	2015	3.71	4.72	6.22	5.3	738.9	4	14	174.6	17	40	18	0.45	4
CC(=O)NC(CS)C(O)=O	0.9	-0.02	-0.02	0	0	1 0	1	-0.624	0	3.896	0	3	0.6	3	2	10	1	4	2	-3.34	-3.97	-0.71	163.19	1	3.82	0	0	4	6	66.4	ACETYLCYSTEINE	2016	-0.69	-0.62	-0.49	-0.53	163.2	2	4	66.4	4	5	3	0.6	0
CCCC1CN(C(CC)C(N)=O)C(=O)C1	3.44	1.09	1.09	0	0	2 0	2	1.009	0	5.911	0	9	0.82	2	1	15	0.36	4	1	0.66	0.66	0.66	212.29	0	14	0	0	4	11	63.4	BRIVARACETAM	2016	1.2	1.01	0.9	0.82	212.3	1	4	63.4	5	11	9	0.82	0
CNCC1=CC=C(C=C1)C2=C3CCNC(=O)C4=C3C(=CC(=C4)F)[NH]2	4.23	2.67	5.67	3	0	0 0	0	3.006	0	9.248	0	4	0.21	1	3	24	0.21	4	3	-0.23	0.55	2.45	323.37	0	13.17	9.32	1	17	7	56.92	RUCAPARIB CAMSYLATE	2016	2.82	3.01	2.98	2	323.4	3	4	56.9	3	19	4	0.21	3
FC(F)(F)C1=CC(=C(C=C1)C(=O)C2C(=O)CCCC2=O)[N](=O)=O	3.77	4.84	5.84	1	0	0 0	0	1.384	0	6.987	0	5	0.36	4	0	23	0.43	6	0	1.04	1.03	3.13	329.23	0	2.92	0	0	14	8	97.03	NITISINONE	2016	1.51	1.38	2.74	2.2	329.2	0	6	97	4	14	5	0.36	1
FC1=CC=CC=C1C2=NCC(=S)N(CC(F)(F)F)C3=C2C=C(Cl)C=C3	6.91	8.94	10.94	2	0	0 0	0	3.697	41	9.499	0	3	0.18	2	0	25	0.18	2	0	5.06	5.06	5.06	386.79	0	14	2.59	0	16	9	15.6	QUAZEPAM	2016	4.03	3.2	5.03	4.2	386.8	0	2	15.6	3	17	3	0.18	2
C[C@H](CCCC(C)(C)O)[C@H]1CC[C@H]2\C(CCC[C@]12C)=C\C=C3\C[C@@H](O)CCC3=C	9.59	8.6	8.6	0	0	5 2	7	7.269	51	12.702	0	21	0.78	2	2	29	0.07	2	2	5.65	5.65	5.65	400.65	0	14	0	0	6	23	40.46	CALCIFEDIOL	2016	6.3	7.27	6.73	7.6	400.6	2	2	40.5	6	27	21	0.78	0
OC(=O)CSC1=NN=C(Br)[N]1C2=CC=C(C3CC3)C4=C2C=CC=C4	5.67	2.8	5.8	3	0	0 0	0	4.012	0	9.849	0	4	0.24	4	0	24	0.35	5	1	0.93	0.63	4.09	404.28	1	3.09	0	0	17	7	68.01	LESINURAD	2016	3.99	4.01	4.24	2.4	404.3	1	5	68	5	17	4	0.24	3
CC[C@H]1[C@@H](O)[C@H]2[C@@H]3CC[C@H]([C@H](C)CCC(O)=O)[C@@]3(C)CC[C@@H]2[C@@]4(C)CC[C@@H](O)C[C@@H]14	7.14	4.49	4.49	0	0	11 0	11	5.362	0	12.022	0	25	0.96	4	2	30	0.15	4	3	2.62	1.79	4.52	420.63	1	4.6	0	0	2	28	77.76	OBETICHOLIC ACID	2016	4.7	5.36	5.11	5.2	420.6	3	4	77.8	5	26	25	0.96	0
CC(C)COC1=CC=C(CNC(=O)N(CC2=CC=C(F)C=C2)C3CCN(C)CC3)C=C1	6.38	7.67	9.67	2	0	0 0	0	4.111	42	12.362	0	12	0.48	1	1	31	0.2	5	1	2.08	2.93	4.01	427.56	0	14	8.44	1	14	17	44.81	PIMAVANSERIN TARTRATE	2016	4.19	4.11	4.67	4.6	427.6	1	5	44.8	10	25	12	0.48	2
CC(=O)N(CC(O)CO)C1=C(I)C(=C(I)C(=C1I)C(=O)NCC(O)CO)C(=O)NCC(O)CO	0.32	1.11	2.11	1	0	3 0	3	-2.444	0	14.769	0	10	0.53	9	8	34	0.63	12	8	-1.95	-1.95	-1.95	821.14	0	11.74	0	0	12	22	199.89	IOHEXOL	2016	-3.05	-2.44	-1.63	-2.8	821.1	8	12	199.9	15	19	10	0.53	1
CC1(C)CCC(=C(C1)C2=CC=C(Cl)C=C2)CN3CCN(CC3)C4=CC=C(C(=O)N[S](=O)(=O)C5=CC=C(NCC6CCOCC6)C(=C5)[N](=O)=O)C(=C4)OC7=CN=C8[NH]C=CC8=C7	9.07	6.56	11.56	5	0	0 0	0	10.312	51	23.639	0	17	0.38	7	3	61	0.33	14	3	6.78	6.88	6.76	868.45	1	4.2	7.96	1	35	24	174.71	VENETOCLAX	2016	5.99	10.31	8.66	8.9	868.4	3	14	174.7	14	45	17	0.38	5
COC(=O)NC(C(C)C)C(=O)N1CCCC1C2=NC(=C[NH]2)C3=CC4=C(C=C3)C5=CC6=C(C=CC(=C6)C7=C[NH]C(=N7)C8CCCN8C(=O)C(NC(=O)OC)C(C)C)[N]5C(O4)C9=CC=CC=C9	6.37	5.88	11.88	6	0	5 0	5	6.655	41	24.573	0	19	0.39	6	4	65	0.33	16	4	7.04	7.07	7.07	882.03	0	12.42	5.39	0	39	26	188.8	ELBASVIR	2016	4.69	6.91	8.12	7	882	4	16	188.8	17	49	19	0.39	6
COC[C@H]1C[C@H](N(C1)C(=O)[C@H](N=C(O)OC)C2=CC=CC=C2)C3=NC=C([NH]3)C4=CC5=C(C=C4)C6=C(OC5)C=C7C(=C6)C=CC8=C7[NH]C(=N8)[C@@H]9CC[C@H](C)N9C(=O)[C@@H](N=C(O)OC)C(C)C	5.33	5.6	11.6	6	0	6 2	8	5.766	59	24.353	0	19	0.39	11	4	65	0.33	16	4	2.69	1.12	4.26	883.02	0	3.74	5.98	0	38	27	200.08	VELPATASVIR	2016	4.42	5.77	8.14	8.3	883	4	16	200.1	15	49	19	0.39	6
CC(O)C[N]1C(=NC=C1[N](=O)=O)C	1.54	0.29	1.29	1	0	1 0	1	-0.148	0	4.527	0	4	0.57	3	1	13	0.86	6	1	-0.04	-0.04	-0.04	185.18	0	14	2.8	0	7	5	83.87	SECNIDAZOLE	2017	0.22	-0.15	0.48	0.11	185.2	1	6	83.9	3	7	4	0.57	1
O=C(C[N]1C=CN=C1[N](=O)=O)NCC2=CC=CC=C2	2.63	2.03	4.03	2	0	0 0	0	0.9	0	6.825	0	2	0.17	3	1	19	0.58	7	1	1.32	1.32	1.32	260.25	0	13.55	0	0	15	3	92.74	BENZNIDAZOLE	2017	0.74	0.9	1.11	0.5	260.2	1	7	92.7	6	12	2	0.17	2
CC(NCC1=CC=C(OCC2=CC(=CC=C2)F)C=C1)C(N)=O	4.48	4.27	6.27	2	0	1 0	1	2.49	41	8.46	0	4	0.24	1	2	22	0.24	4	2	1.04	1.84	2.48	302.35	0	14	7.93	1	14	8	64.35	SAFINAMIDE MESYLATE	2017	2.44	2.49	2.37	1.7	302.3	2	4	64.4	7	17	4	0.24	2
COC1=CC2=C(C=C1OC)C3CC(=O)C(CC(C)C)CN3CC2	6.18	6.05	7.05	1	0	2 0	2	3.465	0	9.074	0	12	0.63	1	0	23	0.21	4	0	2.52	3.14	3.4	317.43	0	14	7.33	1	8	15	38.77	DEUTETRABENAZINE	2017	2.36	3.46	3.24	2.9	317.4	0	4	38.8	4	19	12	0.63	1
NC(=O)C1=CC=CC2=C[N](N=C12)C3=CC=C(C=C3)C4CCCNC4	3.67	2.15	5.15	3	0	1 0	1	2.722	0	9.485	0	5	0.26	2	2	24	0.26	5	2	-0.61	-0.11	2.47	320.4	0	14	10.08	1	17	7	72.94	NIRAPARIB	2017	2.4	2.72	2.59	2.2	320.4	2	5	72.9	3	19	5	0.26	3
COC1=C(OC)C=C2C3CC(OC(=O)C(N)C(C)C)C(CC(C)C)CN3CCC2=C1	6.49	5.41	6.41	1	0	4 0	4	3.974	0	11.915	0	17	0.71	1	1	30	0.25	6	1	0.78	2.3	3.65	418.58	0	14	8.41	2	8	22	74.02	VALBENAZINE	2017	3.52	3.97	3.56	3.4	418.6	1	6	74	8	24	17	0.71	1
CN(C)C(=O)C1=CC2=CN=C(NC3=CC=C(C=N3)N4CCNCC4)N=C2[N]1C5CCCC5	3.06	2.55	5.55	3	0	0 0	0	1.804	0	12.405	0	11	0.48	4	2	32	0.39	9	2	0.07	0.91	2.38	434.55	0	11.57	8.86	1	17	15	91.21	RIBOCICLIB	2017	2.2	1.95	2.8	3	434.5	2	9	91.2	6	23	11	0.48	3
NC1=NC(=C(F)C=C1F)[N]2C=C(C(O)=O)[C](=O)C3=CC(=C(N4CC(O)C4)C(=C23)Cl)F	2.79	2.2	5.2	3	0	0 0	0	1.254	0	9.974	0	3	0.17	4	2	30	0.44	8	3	1.62	0.78	2.56	440.76	1	5.62	0	1	19	11	121.68	DELAFLOXACIN MEGLUMINE	2017	1.65	1.95	1.92	2.5	440.8	3	8	121.7	3	18	3	0.17	3
CC(=O)OCC(=O)[C@@]12N=C(C)O[C@@H]1C[C@H]3[C@@H]4CCC5=CC(=O)C=C[C@]5(C)[C@H]4[C@@H](O)C[C@]23C	4.6	5.01	5.01	0	0	8 0	8	2.86	40	11.744	0	17	0.68	6	1	32	0.28	7	1	1.8	1.8	1.8	441.52	0	14	0.48	0	12	20	102.26	DEFLAZACORT	2017	2.23	2.86	2.56	3.2	441.5	1	7	102.3	4	25	17	0.68	0
COC1=CC=C(NC(=O)C2=CC=C(C=C2)C(=N)N(C)C)C(=C1)C(=O)NC3=CC=C(Cl)C=N3	4.6	2.08	5.08	3	0	0 0	0	3.609	59	12.296	0	3	0.13	3	3	32	0.35	8	3	1.03	1.05	3.44	451.91	0	13.92	11.06	1	24	8	107.41	BETRIXABAN	2017	2.91	3.61	4.14	4.1	451.9	3	8	107.4	9	23	3	0.13	3
CC#CC(=O)N1CCCC1C2=NC(=C3[N]2C=CN=C3N)C4=CC=C(C=C4)C(=O)NC5=CC=CC=N5	3.03	3.72	7.72	4	0	1 0	1	1.581	40	13.319	0	5	0.19	5	2	35	0.35	9	2	2.56	2.56	2.56	465.52	0	14	4.63	0	25	8	118.51	ACALABRUTINIB	2017	2.08	1.58	3.31	2.3	465.5	2	9	118.5	7	26	5	0.19	4
CC(C)(O)CNC1=NC(=NC(=N1)NC2=CC(=NC=C2)C(F)(F)F)C3=NC(=CC=C3)C(F)(F)F	5.23	5.14	8.14	3	0	0 0	0	3.756	0	10.422	0	6	0.32	6	3	33	0.42	8	3	4.59	4.59	4.59	473.38	0	11.37	3.82	0	18	15	108.74	ENASIDENIB MESYLATE	2017	3.5	3.91	4.29	4.3	473.4	3	8	108.7	8	19	6	0.32	3
CCN1CCN(CC1)CC2=CC=C(NC3=NC=C(F)C(=N3)C4=CC(=C5N=C(C)[N](C(C)C)C5=C4)F)N=C2	5.76	4.52	8.52	4	0	0 0	0	4.765	0	14.046	0	11	0.41	4	1	37	0.3	8	1	2.95	3.76	4.42	506.61	0	10.27	7.94	1	21	16	75	ABEMACICLIB	2017	4.22	4.92	4.94	4.8	506.6	1	8	75	7	27	11	0.41	4
CC1=N[N](C=C1)C2=CC(=CC=C2C(OC3=NC(=NC(=C3)C4=CC=C(CC(N)C(O)=O)C=C4)N)C(F)(F)F)Cl	3.86	2.03	6.03	4	0	2 0	2	2.293	41	13.418	0	5	0.2	5	2	38	0.36	9	3	2.77	2.77	2.77	546.94	1	1.63	9.42	1	25	13	142.17	TELOTRISTAT ETHYL	2017	2.26	2.29	4.51	3.7	546.9	3	9	142.2	9	25	5	0.2	4
CCOC1=C(NC(=O)\C=C\CN(C)C)C=C2C(=C1)N=CC(=C2NC3=CC=C(OCC4=CC=CC=N4)C(=C3)Cl)C#N	5.28	4.55	8.55	4	0	0 1	1	4.997	41	15.619	0	6	0.2	4	2	40	0.3	9	2	2.19	3.05	4.47	557.05	0	12.55	8.81	1	26	12	112.4	NERATINIB MALEATE	2017	4.02	5.15	5.93	4.5	557	2	9	112.4	13	30	6	0.2	4
CC(C)(NC(=O)C1=C(O)[C@@H]2OC3=C4C(=CC=C3O)C[C@H]5N(CC[C@@]24[C@@]5(O)C1)CC6CC6)C7=NC(=NO7)C8=CC=CC=C8	4.45	3.01	6.01	3	0	4 0	4	2.825	41	15.44	0	15	0.47	6	4	42	0.31	10	4	0.27	1.13	2.43	570.65	0	9.86	9.05	1	21	21	141.18	NALDEMEDINE TOSYLATE	2017	3.09	2.82	3.48	2	570.6	4	10	141.2	7	32	15	0.47	3
COC1C(CC2O[C@]1(C)[N]3C4=C(C=CC=C4)C5=C3C6=C(C7=C(C=CC=C7)[N]26)C8=C5CNC8=O)N(C)C(=O)C9=CC=CC=C9	6.42	5.86	11.86	6	0	4 0	4	5.491	30	16.495	0	9	0.26	4	1	43	0.23	8	1	5.43	5.43	5.43	570.65	0	13.53	0	0	30	13	77.73	MIDOSTAURIN	2017	4.7	5.49	5.91	3.6	570.6	1	8	77.7	4	35	9	0.26	6
COC1=CC=CC(=C1)N2CCN(CC2)C3=NC4=C(C=CC=C4F)C(CC(O)=O)N3C5=CC(=CC=C5OC)C(F)(F)F	7.39	4.31	7.31	3	0	1 0	1	7.058	59	14.312	0	9	0.31	2	0	41	0.28	8	1	4.58	4.22	4.64	572.56	1	3.75	7.15	1	22	19	77.84	LETERMOVIR	2017	4.29	7.06	5.71	4.4	572.6	1	8	77.8	8	29	9	0.31	3
COC1=CC(=CC=C1NC2=NC=C(Cl)C(=N2)NC3=CC=CC=C3[P](C)(C)=O)N4CCC(CC4)N5CCN(C)CC5		4.05	7.05	3	0	0 0	0	1.724	42	16.242	0	13	0.45	3	2	40	0.31	9	2	1.62	2.49	3.66	584.1	0	12.88	8.54	1	20	20	85.86	BRIGATINIB	2017	4.6	2.02	5.09	5.8	584.1	2	9	85.9	8	29	13	0.45	3
CC(C)(C)C1NC(=O)OC2CCCC2OCC=CC(F)(F)C3=NC4=C(C=CC=C4)N=C3OC5CC(N(C5)C1=O)C(=O)N[C@@]6(CC6C(F)F)C(=O)N[S](=O)(=O)C7(C)CC7	4.74	3.43	5.43	2	0	8 1	9	4.002	41	20.047	0	24	0.63	9	3	58	0.42	15	3	3.02	3.01	3.95	838.87	1	3.74	0	0	22	35	195.22	GLECAPREVIR	2017	4.31	4	3.86	5.5	838.9	3	15	195.2	9	38	24	0.63	2
CCC1C2CN(C1C(=O)N[C@@]3(CC3C(F)F)C(=O)N[S](=O)(=O)C4(C)CC4)C(=O)C(NC(=O)OC5CC5CCCCC(F)(F)C6=C(O2)N=C7C=C(OC)C=CC7=N6)C(C)(C)C	6.85	4.67	6.67	2	0	9 0	9	6.69	41	21.04	0	28	0.7	8	3	60	0.4	15	3	3.97	3.96	4.9	868.94	1	3.74	0	0	20	39	195.22	VOXILAPREVIR	2017	5.03	6.69	4.96	6.9	868.9	3	15	195.2	11	40	28	0.7	2
CO[C@H](C)[C@H](N=C(O)OC)C(=O)N1CCC[C@H]1C2=NC3=C([NH]2)C=C(F)C(=C3)[C@H]4CC[C@@H](N4C5=CC(=C(N6CCC(CC6)C7=CC=C(F)C=C7)C(=C5)F)F)C8=CC9=C([NH]C(=N9)[C@@H]%10CCCN%10C(=O)[C@@H](N=C(O)OC)[C@@H](C)OC)C=C8F				6	0	8 2	10	7.254	59	28.628	0	27	0.47	12	4	80	0.32	18	4	4.39	2.95	6.93	1113.2	0	3.58	5.34	0	38	42	206.56	PIBRENTASVIR	2017	4.9	7.25	9.86	9	1113	4	18	206.6	19	57	27	0.47	6
CC(C)C[C@H](N=C(O)[C@@H]1CSSC[C@@H]2N=C(O)[C@H](CC(C)C)N=C(O)[C@H](CCC(O)=O)N=C(O)[C@H](CSSC[C@H](N=C(O)[C@H](C)N=C(O)[C@@H](N=C(O)[C@H](CC(O)=N)N=C(O)[C@@H](N=C2O)C(C)C)C(C)C)C(=N[C@@H]([C@@H](C)O)C(=NCC(=N1)O)O)O)N=C(O)[C@H](CCC(O)=O)N=C(O)[C@H](CC(O)=O)N=C(O)[C@@H](N)CC(O)=N)C(O)=O				0	0	16 15	31	0.124	59	40.327	0	44	0.68	43	21	113	0.74	44	25	-19.67	-23.28	3.71	1681.89	4	2.43	0	1	42	71	772.46	PLECANATIDE	2017	-1.41	0.12	6.56	0	1682	25	44	772.5	28	65	44	0.68	0

## Sheet: Classifications
SMILES	TBR Class	SUBSTANCENAME
N[C@@H](CCC(N)=O)C(O)=O	AA	GLUTAMINE
NCCCCCC(O)=O	AA	AMINOCAPROIC ACID
NC(C(O)C1=CC(O)=C(O)C=C1)C(O)=O	AA	DROXIDOPA
NC(CC1=CC(O)=C(O)C=C1)C(O)=O	AA	LEVODOPA
C[C@](N)(CC1=CC=C(O)C(O)=C1)C(O)=O	AA	METHYLDOPA
NC(CCC(O)=O)C=C	AA	VIGABATRIN
NC1=NC2=C(N=CN2COC(CO)CO)C(=O)N1	AA	GANCICLOVIR
C[C@](N)(CC1=CC=C(O)C=C1)C(O)=O	AA	METYROSINE
CC(C)(S)[C@@H](N)C(O)=O	AA	PENICILLAMINE
NCC1CCC(CC1)C(O)=O	AA	TRANEXAMIC ACID
NCC1(CC(O)=O)CCCCC1	AA	GABAPENTIN
CC(C)CC(CN)CC(O)=O	AA	PREGABALIN
NC(=O)NC(CCC(O)=O)C(O)=O	AA	CARGLUMIC ACID
CC(C)C(N)C(=O)OCC(CO)OCN1C=NC2=C1NC(N)=NC2=O	AA	VALGANCICLOVIR HYDROCHLORIDE
NCC(CC(O)=O)C1=CC=C(Cl)C=C1	AA	BACLOFEN
CC(=O)NC(CS)C(O)=O	AA	ACETYLCYSTEINE
COC1=CC(C(O)CNC(=O)CN)=C(OC)C=C1	AA	MIDODRINE HYDROCHLORIDE
CCC(N1CCCC1=O)C(N)=O	AA	LEVETIRACETAM
NC(CC1=CC=C(C=C1)N(CCCl)CCCl)C(O)=O	AA	MELPHALAN
C[C@@](CC1=CC(O)=C(O)C=C1)(NN)C(O)=O	AA	CARBIDOPA
COCC(NC(C)=O)C(=O)NCC1=CC=CC=C1	AA	LACOSAMIDE
CC(CS)C(=O)N1CCCC1C(O)=O	AA	CAPTOPRIL
CO\N=C(/C(=O)NC1[C@H]2SCC(C=CC3=C(C)N=CS3)=C(N2C1=O)C(O)=O)C1=CSC(N)=N1	AntiB	CEFDITOREN PIVOXIL
CC1=C(N2[C@H](SC1)C(NC(=O)C(N)C1=CC=C(O)C=C1)C2=O)C(O)=O	AntiB	CEFADROXIL HEMIHYDRATE
CC1(C)S[C@@H]2C(NC(=O)C(N)C3=CC=C(O)C=C3)C(=O)N2C1C(O)=O	AntiB	AMOXICILLIN
NC(C(=O)NC1[C@H]2SCC(Cl)=C(N2C1=O)C(O)=O)C1=CC=CC=C1	AntiB	CEFACLOR
CC1=C(N2[C@H](SC1)C(NC(=O)C(N)C1=CC=CC=C1)C2=O)C(O)=O	AntiB	CEPHALEXIN
CC=CC1=C(N2[C@H](SC1)[C@H](NC(=O)C(N)C1=CC=C(O)C=C1)C2=O)C(O)=O	AntiB	CEFPROZIL
NC1=NC(=CS1)C(=N\OCC(O)=O)\C(=O)NC1[C@H]2SCC(C=C)=C(N2C1=O)C(O)=O	AntiB	CEFIXIME
NC1=NC(=CS1)C(=CCC(O)=O)C(=O)NC1[C@H]2SCC=C(N2C1=O)C(O)=O	AntiB	CEFTIBUTEN DIHYDRATE
COCC1=C(N2[C@H](SC1)C(NC(=O)C(=N/OC)\C1=CSC(N)=N1)C2=O)C(O)=O	AntiB	CEFPODOXIME PROXETIL
NC1=NC(=CS1)C(=N\O)\C(=O)NC1[C@H]2SCC(C=C)=C(N2C1=O)C(O)=O	AntiB	CEFDINIR
CO\N=C(/C(=O)NC1[C@H]2SCC(COC(N)=O)=C(N2C1=O)C(O)=O)C1=CC=CO1	AntiB	CEFUROXIME AXETIL
CC1(C)S[C@@H]2[C@H](NC(=O)COC3=CC=CC=C3)C(=O)N2[C@H]1C(O)=O	AntiB	PENICILLIN V POTASSIUM
CC1=C(C(=O)NC2[C@H]3SC(C)(C)C(N3C2=O)C(O)=O)C(=NO1)C1=C(Cl)C=CC=C1Cl	AntiB	DICLOXACILLIN SODIUM
NCC1OC(OC2C(CO)OC(OC3C(O)C(N)CC(N)C3OC3OC(CO)C(O)C(O)C3N)C2O)C(N)C(O)C1O	AntiB	PAROMOMYCIN SULFATE
NC[C@@H]1O[C@H](O[C@@H]2[C@@H](CO)O[C@@H](O[C@@H]3[C@@H](O)[C@H](N)C[C@H](N)[C@H]3O[C@H]3O[C@H](CN)[C@@H](O)[C@H](O)[C@H]3N)[C@@H]2O)[C@H](N)[C@@H](O)[C@@H]1O	AntiB	NEOMYCIN SULFATE
NCC1OC(OC2C(N)CC(N)C(OC3OC(CO)C(O)C(N)C3O)C2O)C(N)CC1O	AntiB	TOBRAMYCIN
CNC(CC(C)C)C(=O)NC1C(O)C2=CC=C(OC3=C(OC4OC(CO)C(O)C(O)C4OC4C[C@](C)(N)C(O)C(C)O4)C4=CC(=C3)C(NC(=O)C(CC(N)=O)NC1=O)C(=O)NC1C3=CC(=C(O)C=C3)C3=C(O)C=C(O)C=C3C(NC(=O)C(NC1=O)C(O)C1=CC(Cl)=C(O4)C=C1)C(O)=O)C(Cl)=C2	AntiB	VANCOMYCIN HYDROCHLORIDE
CCOC1=CC=C(CC2=C(Cl)C=CC(=C2)C2OC(CO)C(O)C(O)C2O)C=C1	AntiB	DAPAGLIFLOZIN PROPANEDIOL
CCC1OC(=O)C(C)C(O[C@H]2C[C@@](C)(OC)C(O)C(C)O2)C(C)C(O[C@@H]2OC(C)CC(C2O)N(C)C)[C@@](C)(CC(C)C(=O)C(C)C(O)[C@]1(C)O)OC	AntiB	CLARITHROMYCIN
CCC1OC(=O)C(C)C(OC2C[C@@](C)(OC)C(O)C(C)O2)C(C)C(OC2OC(C)CC(C2O)N(C)C)[C@](C)(O)CC(C)CN(C)C(C)C(O)[C@]1(C)O	AntiB	AZITHROMYCIN DIHYDRATE
CC[C@H](C)[C@H]1O[C@]2(CC[C@@H]1C)C[C@@H]1C[C@@H](C\C=C(C)\[C@@H](O[C@H]3C[C@H](OC)[C@@H](O[C@H]4C[C@H](OC)[C@@H](O)[C@H](C)O4)[C@H](C)O3)[C@@H](C)\C=C\C=C3/CO[C@@H]4[C@H](O)C(C)=C[C@@H](C(=O)O1)[C@]34O)O2	AntiB	IVERMECTIN
CN(C)C1[C@@H]2C[C@H]3C(=C(O)[C@]2(O)C(=O)C(C(N)=O)=C1O)C(=O)C1=C(O)C=CC=C1[C@@]3(C)O	AntiB	TETRACYCLINE HYDROCHLORIDE
CC1(C)S[C@@H]2C(NC(=O)C(N)C3=CC=CC=C3)C(=O)N2C1C(O)=O	AntiB	AMPICILLIN TRIHYDRATE
CO\N=C1/CN(CC1CN)C1=NC2=C(C=C1F)C(=O)C(=CN2C1CC1)C(O)=O	AntiB	GEMIFLOXACIN MESYLATE
CC1OC1P(O)(O)=O	AntiB	FOSFOMYCIN TROMETHAMINE
CC1=NC=C(N1CCO)N(=O)=O	AntiB	METRONIDAZOLE
O=C1CN(\N=C\C2=CC=C(O2)N(=O)=O)C(=O)N1	AntiB	NITROFURANTOIN
COC1=C2N(C=C(C(O)=O)C(=O)C2=CC(F)=C1N1C[C@@H]2CCCN[C@@H]2C1)C1CC1	AntiB	MOXIFLOXACIN HYDROCHLORIDE
CC1[C@H]2C(O)[C@H]3C(N(C)C)C(O)=C(C(N)=O)C(=O)[C@@]3(O)C(O)=C2C(=O)C2=C1C=CC=C2O	AntiB	DOXYCYCLINE HYCLATE
CC(O)CN1C(C)=NC=C1N(=O)=O	AntiB	SECNIDAZOLE
CN(C)C1[C@@H]2C[C@@H]3C(O)C4=C(C(O)=CC=C4Cl)C(=O)C3=C(O)[C@]2(O)C(=O)C(C(N)=O)=C1O	AntiB	DEMECLOCYCLINE HYDROCHLORIDE
O=C(CN1C=CN=C1N(=O)=O)NCC1=CC=CC=C1	AntiB	BENZNIDAZOLE
CC1=CC(NS(=O)(=O)C2=CC=C(N)C=C2)=NO1	AntiB	SULFAMETHOXAZOLE
CN1N=NC(=N1)C1=CC=C(C=N1)C1=CC=C(C=C1F)N1CC(COP(O)(O)=O)OC1=O	AntiB	TEDIZOLID PHOSPHATE
COC1=CC(CC2=CN=C(N)N=C2N)=CC(OC)=C1OC	AntiB	TRIMETHOPRIM
NC1=NC(N2C=C(C(O)=O)C(=O)C3=CC(F)=C(N4CC(O)C4)C(Cl)=C23)=C(F)C=C1F	AntiB	DELAFLOXACIN MEGLUMINE
CCC[C@@H]1C[C@H](N(C)C1)C(O)=N[C@H]([C@H](C)Cl)[C@H]1O[C@H](SC)[C@H](O)[C@@H](O)[C@H]1O	AntiB	CLINDAMYCIN HYDROCHLORIDE
CC(=O)OC1=CC=CC=C1C(=O)NC1=NC=C(S1)N(=O)=O	AntiB	NITAZOXANIDE
CCC1OC(=O)C(C)C(=O)C(C)C(OC2OC(C)CC(C2O)N(C)C)[C@@](C)(CC(C)C(=O)C(C)[C@H]2N(CCCCN3C=NC(=C3)C3=CC=CN=C3)C(=O)O[C@]12C)OC	AntiB	TELITHROMYCIN
CC[C@@H]([C@H](C)O)N1N=CN(C1=O)C1=CC=C(C=C1)N1CCN(CC1)C1=CC=C(OC[C@@H]2CO[C@](CN3C=NC=N3)(C2)C2=C(F)C=C(F)C=C2)C=C1	AntiB	POSACONAZOLE
C[C@H]1O[C@H](O[C@@H]2[C@@H](CO)O[C@H](O[C@H]([C@H](O)CO)[C@H](O)[C@@H](O)C=O)[C@H](O)[C@H]2O)[C@H](O)[C@@H](O)[C@@H]1N[C@H]1C=C(CO)[C@@H](O)[C@H](O)[C@H]1O	Carb	ACARBOSE
OCC1O[C@](O)(CO)C(O)C1OC1OC(CO)C(O)C(O)C1O	Carb	LACTULOSE
OC1COC(OC2COC(O)C(OS(O)(=O)=O)C2OS(O)(=O)=O)C(OS(O)(=O)=O)C1OS(O)(=O)=O	Carb	PENTOSAN POLYSULFATE SODIUM
OCCN1CC(O)C(O)C(O)C1CO	Carb	MIGLITOL
CC1OC(OC2CC(O)C(C(O)CC(=O)CC(O)C(O)CCC(O)CC(O)CC(O)CC(=O)OC(C)C(C)C(O)C(C)C=CC=CCCC=CC=CC=CC=C2)C(O)=O)C(O)C(N)C1O	Carb	NYSTATIN
CCCCN1CC(O)C(O)C(O)C1CO	Carb	MIGLUSTAT
CC1(C)O[C@@H]2CO[C@@]3(COS(N)(=O)=O)OC(C)(C)O[C@H]3[C@@H]2O1	Carb	TOPIRAMATE
CC1=CC=C(C=C1CC1=CC=C(S1)C1=CC=C(F)C=C1)[C@@H]1OC(CO)C(O)C(O)C1O	Carb	CANAGLIFLOZIN
CC1OC(CC(O)C1O)OC1C(O)CC(OC2C(O)CC(OC3CC[C@@]4(C)[C@H](CC[C@@H]5[C@@H]4CC(O)[C@]4(C)C(CC[C@]54O)C4=CC(=O)OC4)C3)OC2C)OC1C	Carb	DIGOXIN
NC(=O)C1=NN(C=N1)C1OC(CO)C(O)C1O	Nucleo	RIBAVIRIN
NC1=NC(=O)C2=C(N1)N(COCCO)C=N2	Nucleo	ACYCLOVIR
CC1=CN(C2CC(O)C(CO)O2)C(=O)NC1=O	Nucleo	TELBIVUDINE
NC1=NC(=O)N(C=C1)C1CSC(CO)O1	Nucleo	LAMIVUDINE
NC1=NC(=O)C2=C(N1)N(C=N2)C1CC(O)C(CO)C1=C	Nucleo	ENTECAVIR
NC1=NC(=O)N(C=C1F)C1CSC(CO)O1	Nucleo	EMTRICITABINE
CC1=CN(C2OC(CO)C=C2)C(=O)NC1=O	Nucleo	STAVUDINE
OCC1CCC(O1)N1C=NC2=C1NC=NC2=O	Nucleo	DIDANOSINE
CC(C)C(N)C(=O)OCCOCN1C=NC2=C1NC(N)=NC2=O	Nucleo	VALACYCLOVIR HYDROCHLORIDE
OCC1OC(CC1O)N1C=C(C(=O)NC1=O)C(F)(F)F	Nucleo	TRIFLURIDINE
CC1=CN(C2CC(N=[N+]=[N-])C(CO)O2)C(=O)NC1=O	Nucleo	ZIDOVUDINE
CC(=O)OCC1OC(C(OC(C)=O)C1OC(C)=O)N1C=CC(=O)NC1=O	Nucleo	URIDINE TRIACETATE
CC(=O)OCC(CCN1C=NC2=CN=C(N)N=C12)COC(C)=O	Nucleo	FAMCICLOVIR
CC(C)OC(=O)C(C)N[P@](=O)(OCC1OC(N2C=CC(=O)NC2=O)[C@](C)(F)C1O)OC1=CC=CC=C1	Nucleo	SOFOSBUVIR
CCCCCOC(=O)NC1=NC(=O)N(C=C1F)C1OC(C)C(O)C1O	Nucleo	CAPECITABINE
NC1=NC(NC2CC2)=C2N=CN(C3CC(COC(=O)CO)C=C3)C2=N1	Nucleo	ABACAVIR SULFATE
CC(C)C[C@H](N=C(O)[C@@H]1CSSC[C@@H]2N=C(O)[C@H](CC(C)C)N=C(O)[C@H](CCC(O)=O)N=C(O)[C@H](CSSC[C@H](N=C(O)[C@H](C)N=C(O)[C@@H](N=C(O)[C@H](CC(O)=N)N=C(O)[C@@H](N=C2O)C(C)C)C(C)C)C(O)=N[C@@H]([C@@H](C)O)C(O)=NCC(O)=N1)N=C(O)[C@H](CCC(O)=O)N=C(O)[C@H](CC(O)=O)N=C(O)[C@@H](N)CC(O)=N)C(O)=O	Peptide	PLECANATIDE
NC(=O)CCC1NC(=O)C(CC2=CC=CC=C2)NC(=O)C(CC2=CC=C(O)C=C2)NC(=O)CCSSCC(NC(=O)C(CC(N)=O)NC1=O)C(=O)N1CCCC1C(=O)NC(CCCNC(N)=N)C(=O)NCC(N)=O	Peptide	DESMOPRESSIN ACETATE
CC(O)[C@@H]1NC(=O)C2CSSCC3NC(=O)C(N)CSSCC(NC(=O)[C@H](CSSC[C@H](NC(=O)CNC1=O)C(=O)NC(CC1=CC=C(O)C=C1)C(O)=O)NC(=O)C(CC1=CC=C(O)C=C1)NC(=O)C(CCC(O)=O)NC3=O)C(=O)NC(CC(N)=O)C(=O)N1CCCC1C(=O)NC(C)C(=O)N2	Peptide	LINACLOTIDE
CCCC(NC(C)C(=O)N1[C@H]2CCCC[C@H]2CC1C(O)=O)C(=O)OCC	Peptide	PERINDOPRIL ERBUMINE
CCOC(=O)C(CCC1=CC=CC=C1)NC(C)C(=O)N1CCCC1C(O)=O	Peptide	ENALAPRIL MALEATE
CCC1NC(=O)C(C(O)C(C)CC=CC)N(C)C(=O)C(C(C)C)N(C)C(=O)C(CC(C)C)N(C)C(=O)C(CC(C)C)N(C)C(=O)C(C)NC(=O)C(C)NC(=O)C(CC(C)C)N(C)C(=O)C(NC(=O)C(CC(C)C)N(C)C(=O)CN(C)C1=O)C(C)C	Peptide	CYCLOSPORINE
CC(=O)NCC1CN(C(=O)O1)C1=CC(F)=C(C=C1)N1CCOCC1	TB Drug	LINEZOLID
NC1CONC1=O	TB Drug	CYCLOSERINE
CCC1OC(=O)C(C)C(OC2C[C@@](C)(OC)C(O)C(C)O2)C(C)C(OC2OC(C)CC(C2O)N(C)C)[C@](C)(O)CC(C)C(=O)C(C)C(O)[C@]1(C)O	AntiB	ERYTHROMYCIN STEARATE
NC(=O)C1=NC=CN=C1	TB Drug	PYRAZINAMIDE
OC(=O)C1=CN(C2CC2)C2=CC(N3CCNCC3)=C(F)C=C2C1=O	TB Drug	CIPROFLOXACIN HYDROCHLORIDE
NNC(=O)C1=CC=NC=C1	TB Drug	ISONIAZID
CCC(CO)NCCNC(CC)CO	TB Drug	ETHAMBUTOL HYDROCHLORIDE
CC1COC2=C3N1C=C(C(O)=O)C(=O)C3=CC(F)=C2N1CCN(C)CC1	TB Drug	LEVOFLOXACIN
NC1=CC(O)=C(C=C1)C(O)=O	TB Drug	AMINOSALICYLIC ACID
CCC1=NC=CC(=C1)C(N)=S	TB Drug	ETHIONAMIDE
CO[C@H]1C=CO[C@@]2(C)OC3=C(C2=O)C2=C(O)C(\C=N\N4CCN(C)CC4)=C(NC(=O)\C(C)=C/C=C\[C@H](C)[C@H](O)[C@@H](C)[C@@H](O)[C@@H](C)[C@H](OC(C)=O)[C@@H]1C)C(O)=C2C(O)=C3C	TB Drug	RIFAMPIN
COC1=NC2=C(C=C(Br)C=C2)C=C1C(C1=CC=CC=C1)[C@@](O)(CCN(C)C)C1=CC=CC2=C1C=CC=C2	TB Drug	BEDAQUILINE FUMARATE
	TB Drug	Delamanid
	TB Drug	Rifamycin
	TB Drug	Kanamycin
	TB Drug	Pretomanid
	TB Drug	Streptomycin
	TB Pipeline	GSK-656
	TB Pipeline	Delpazolid
	TB Pipeline	SQ109
	TB Pipeline	Sutezolid
	TB Pipeline	TBA-7371
	TB Pipeline	TBI-223
	TB Pipeline	Contezolid
	TB Pipeline	BTZ043
	TB Pipeline	Macozinone
	TB Pipeline	OPC-167832
	TB Pipeline	SPR720
	TB Pipeline	Telacebec
	TB Pipeline	Riminophenazine

## Sheet: Drug Table
SMILES	class	TB Drug	Class	MW	clog P	HBD	HBA	Lip vio	cmr	Chrom logD	PFI
N[C@@H]1CONC1=O	1	Cycloserine	SHM	102	-1.2	2	4	0	2.3	-0.1	-0.1
NC(=O)C1=NC=CN=C1	1	Pyrazinamide	SHM	123	-0.7	1	4	0	3.1	-0.6	0.4
NNC(=O)C1=CC=NC=C1	1	Isoniazid	SHM	137	-0.7	2	4	0	3.7	-0.6	0.4
NC1=CC(=C(C=C1)C(O)=O)O	1	p-amino salicylic acid	SHM	153	1.1	3	4	0	3.9	-1.3	-0.3
CCc1cc(ccn1)C(N)=S	1	Ethionamide	SHM	166	1.7	1	2	0	5.1	2.3	3.3
CC[C@H](CO)NCCN[C@H](CC)CO	1	Ethambutol	SHM	204	0.1	4	4	0	5.9	-0.1	-0.1
OC(=O)c1cn(C2CC2)c2cc(N3CCNCC3)c(F)cc2c1=O	2	Ciprofloxacin	fluoroquinilone	331	-0.7	2	6	0	8.7	0.8	2.8
CC1COc2c(N3CCN(C)CC3)c(F)cc3c2n1cc(C(O)=O)c3=O	2	Oflaxacin	fluoroquinilone	361	-0.5	1	7	0	9.3	1	3
CC(=O)NCC1CN(C(=O)O1)C2=CC(=C(C=C2)N3CCOCC3)F	3	Linezolid	Oxazolidinone	338	0.2	1	7	0	8.5	2	3
[O-][N+](=O)c1cn2c(n1)OC[C@H](C2)OCc1ccc(cc1)OC(F)(F)F	4	Pretomanid	nitroimidazole	359	2.8	0	8	0	7.7	6	8
C[C@]1(COc2ccc(cc2)N2CCC(CC2)Oc2ccc(OC(F)(F)F)cc2)Cn2cc(nc2O1)[N+]([O-])=O	4	Delamanid	nitroimidazole	534	5.3	0	10	3	12.9	8	11
CN(C)CC[C@](O)([C@H](c1ccccc1)c1cnc2ccc(Br)cc2c1)c1cccc2ccccc12	4	Bedaquiline	Arylquinoline	556	6.9	1	3	2	15	6	11.9
NC[C@H]1O[C@H](O[C@@H]2[C@@H](N)C[C@@H](N)[C@H](O[C@H]3O[C@H](CO)[C@@H](O)[C@H](N)[C@H]3O)[C@H]2O)[C@H](O)[C@@H](O)[C@@H]1O	5	Kanamycin	Aminoglycoside	484	-3.9	11	15	2	11.2	0.9	0.9
C[C@H]1[C@@](C=O)(O)[C@@H](O[C@H]2[C@@H](NC)[C@H](O)[C@@H](O)[C@H](CO)O2)[C@H](O[C@@H]3[C@@H](NC(N)=N)[C@H](O)[C@@H](NC(N)=N)[C@H](O)[C@H]3O)O1	5	Streptomycin	Aminoglycoside	571	-3.5	14	19	3	13.3	-5	-5
CO[C@H]1\C=C\O[C@@]2(C)Oc3c(C)c(O)c4c(O)c(NC(=O)\C(=C/C=C/[C@H](C)[C@H](O)[C@@H](C)[C@@H](O)[C@@H](C)[C@H](OC(=O)C)[C@@H]1C)\C)cc(O)c4c3C2=O	6	Rifamycin	Rifamycin	698	4.2	13	6	3	18.2	4.6	6.6
CO[C@H]1\C=C\O[C@@]2(C)Oc3c(C)c(O)c4c(O)c(NC(=O)\C(C)=C/C=C/[C@H](C)[C@H](O)[C@@H](C)[C@@H](O)[C@@H](C)[C@H](OC(C)=O)[C@@H]1C)c(\C=N\N1CCN(C)CC1)c(O)c4c3C2=O	6	Rifampicin	Rifamycin	823	3.7	6	16	3	22	4.3	6.3

## Sheet: Pipeline table
	TB Drug	class	MW	clog P	HBD	HBA	Lip vio	cmr	Chrom logD	PFI
1	GSK-656	Boronate	257	0.2	3	5	0	6.3	0	1	GSK-656	OCCOc1ccc(c2c1B(O)O[C@@H]2CN)Cl
1	Delpazolid	Oxazol	308	1.4	1	7	0	7.9	1.8	2.8	Delpazolid	OC[C@H]1CN(C(=O)O1)c1ccc(c(c1)F)N1CCN(N=C1)C
1	Sutezolid	Oxazol	353	1	1	6	0	9.1	3.7	4.7	Sutezolid	CC(=O)NC[C@@H]1OC(=O)N(C1)c1ccc(c(c1)F)N1CCSCC1
1	TBI-223	Oxazol	365	0.7	1	8	0	8.9	3.1	4.1	TBI-223	COC(=O)NC[C@@H]1OC(=O)N(C1)c1ccc(c(c1)F)N1CC2(C1)COC2
1	Contezolid	Oxazol	408	2.3	1	8	0	9.4	3.1	5.1	Contezolid	O=C1CCN(C=C1)c1c(F)cc(c(c1F)F)N1C[C@@H](OC1=O)CNc1ccon1
1	OPC-167832	DprE1	457	3.3	3	6	0	10.8	3.9	5.9	OPC-167832	O=C1CCc2c(N1)c(F)ccc2OC[C@]1(O)CCN(C[C@H]1O)c1c(F)cc(cc1F)Cl
2	TBA-7371	DprE1	355	1.2	2	7	0	9.6	2.4	5.4	TBA-7371	OCCNC(=O)c1cn(c2c1ncc(c2)C)Cc1ncnc(c1C)OC
2	BTZ043	DprE1	431	2.5	0	8	0	9.7	6.8	8.8	BTZ043	C[C@H]1COC2(O1)CCN(CC2)c1nc(=O)c2c(s1)c(cc(c2)C(F)(F)F)[N+](=O)[O-]
2	Macozinone	DprE1	456	5.1	0	7	1	11.2	8.9	10.9	Macozinone	[O-][N+](=O)c1cc(cc2c1sc(nc2=O)N1CCN(CC1)CC1CCCCC1)C(F)(F)F
3	SPR720	Benzimidazoylurea	508	-0.4	5	11	3	12.3	0.7	3.7	SPR720	CCNC(=O)Nc1nc2c([nH]1)cc(c(c2C1CCCO1)F)c1cnc(nc1)C(OP(=O)(O)O)(C)C
4	SQ109	Adaman	331	6.8	2	2	1	10.5	6.3	6.3	SQ109	C/C(=C\CNCCNC1C2CC3CC1CC(C2)C3)/CCC=C(C)C
5	Telacebec	Imidazopyrdine	557	7.6	1	6	2	14.5	8.6	12.6	Telacebec	CCc1nc2n(c1C(=O)NCc1ccc(cc1)N1CCC(CC1)c1ccc(cc1)OC(F)(F)F)cc(cc2)Cl
6	Riminophenazine	Clofazimine	590	6.7	1	8	2	15.8	8.3	12.3	Riminophenazine	CO[C@@H]1CC[C@H](CC1)/N=c/1\cc2c(cc1Nc1cccnc1OC)nc1c(n2c2ccc(cc2)OC(F)(F)F)cccc1
