# Supplementary material for: Physicochemical properties and Mycobacterium tuberculosis transporters: keys to efficacious antitubercular drugs?
Source: Royal Society of Chemistry journal article supplement (doi:10.1039/d0md00265h), 2020-12-07
Supplement: d0md00265h2.pdf [file d0md00265h2.pdf]

*Supplementary Data for*

**Physicochemical properties and *Mycobacterium tuberculosis*  
transporters: keys to efficacious antitubercular drugs?**

Elizabeth Fullam and Robert J. Young

Blue Burgundy Ltd, Ampthill, Bedford, MK45 2AD, UK

Correspondence: [rob@blue-burgundy.co.uk](mailto:rob@blue-burgundy.co.uk)

# Supplementary data

## Section 1

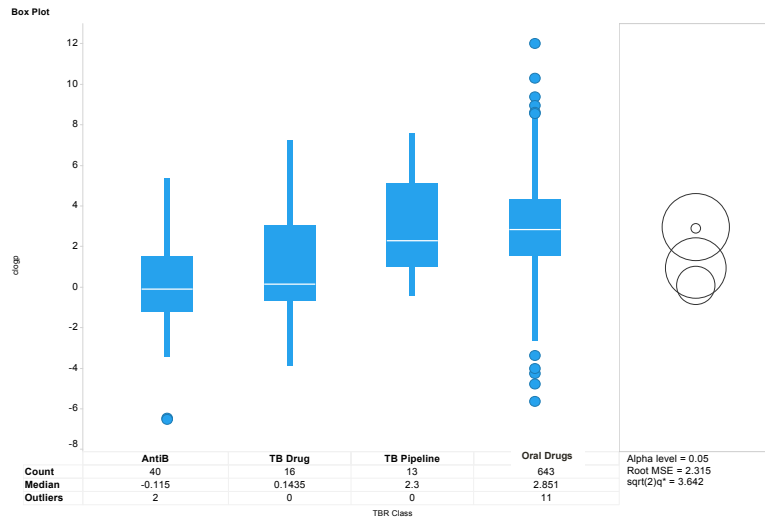

A

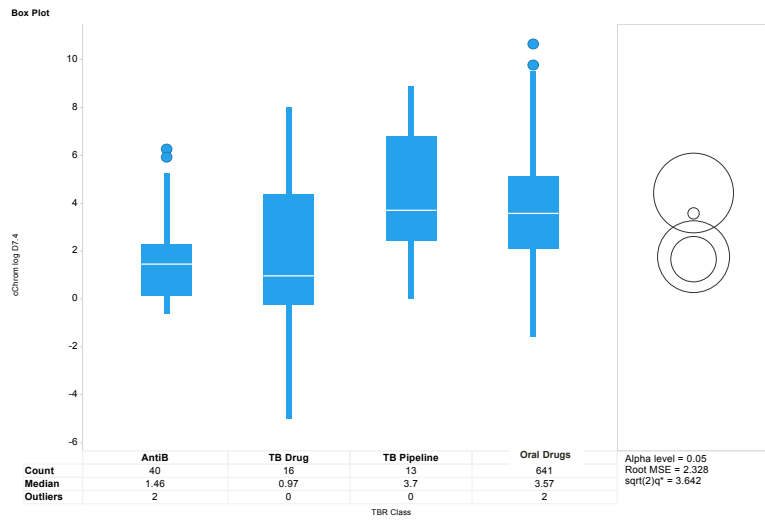

B

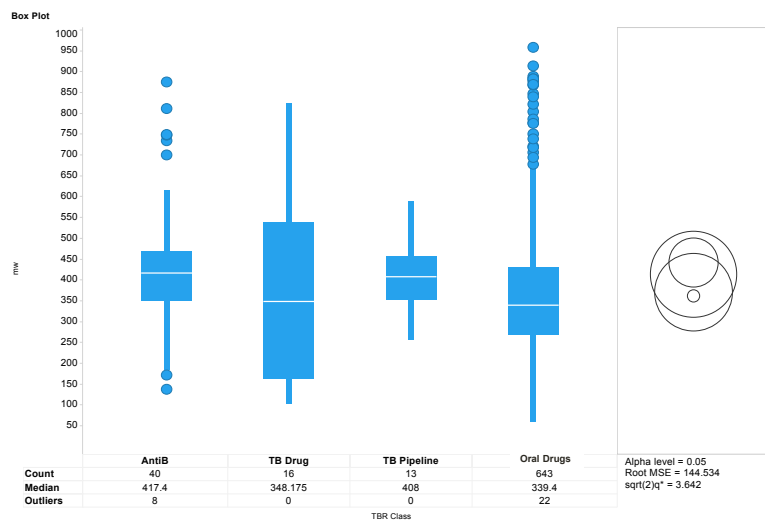

C

Figure S1 Box plot distributions of A) clog P, B) c Chrom log  $D_{7.4}$  and C) molecular weight of oral antibacterials, TB drugs, molecules within the TB pipeline and oral drugs.
